# Supplementary material
Source: PubMed Central journal article supplement (PMC4539580)
Supplement: NIHMS62963-supplement-2.pdf [file NIHMS62963-supplement-2.pdf]

MALE

| Protein Name                                                        | Accession Number | Molecular Weight |      |      |      |      |       |       |         |      | H    |            | PDAC        | t-test |     | PDAC/H | PDAC/CP |
|---------------------------------------------------------------------|------------------|------------------|------|------|------|------|-------|-------|---------|------|------|------------|-------------|--------|-----|--------|---------|
|                                                                     |                  |                  | CP1  | CP2  | H1   | H2   | PDAC1 | PDAC2 | CP Mean | Mean | Mean | PDAC vs. H | PDAC vs. CP |        |     |        |         |
| - 22 kDa protein                                                    | IPI00219910      | 22 kDa           |      | 7    | 5    | 4    | 8     | 1     | 0       | 6    | 6    | 1          | 0.1126      | 0.0456 | 0.1 | 0.1    |         |
| - Cold agglutinin FS-1 L-chain (Fragment)                           | IPI00827773      | 12 kDa           | 32   | 39   | 34   | 26   | 53    | 57    | 36      | 30   | 55   | 0.0309     | 0.0388      | 1.8    | 1.5 |        |         |
| - HRV Fab 027-VL (Fragment)                                         | IPI00827643      | 12 kDa           | 4    | 6    | 0    | 0    | 0     | 0     | 5       | 0    | 0    | -          | 0.0574      | -      | 0.0 |        |         |
| - REV25-2 (Fragment)                                                | IPI00816794      | 15 kDa           | 8    | 12   | 5    | 7    | 8     | 9     | 10      | 6    | 8    | 0.2225     | 0.3844      | 1.3    | 0.8 |        |         |
| A1BG Alpha-1B-glycoprotein precursor                                | IPI00022895      | 54 kDa           | 115  | 109  | 106  | 112  | 111   | 100   | 112     | 109  | 105  | 0.6497     | 0.4138      | 1.0    | 0.9 |        |         |
| A2M Alpha-2-macroglobulin precursor                                 | IPI00478003      | 163 kDa          | 62   | 63   | 86   | 72   | 14    | 18    | 63      | 79   | 16   | 0.0120     | 0.0019      | 0.2    | 0.3 |        |         |
| ABCB1 Multidrug resistance protein 1                                | IPI00027481      | 141 kDa          | 41   | 46   | 23   | 26   | 52    | 64    | 43      | 25   | 58   | 0.0355     | 0.1660      | 2.4    | 1.3 |        |         |
| ABHD14B Isoform 1 of Abhydrolase domain-containing prc              | IPI00063827      | 22 kDa           | 19   | 15   | 19   | 17   | 15    | 9     | 17      | 18   | 12   | 0.2502     | 0.3306      | 0.7    | 0.7 |        |         |
| ABP1 Isoform 1 of Amiloride-sensitive amine oxidase [cop            | IPI00020982      | 85 kDa           | 1    | 5    | 8    | 8    | 0     | 0     | 3       | 8    | 0    | 0.0001     | 0.2445      | 0.0    | 0.0 |        |         |
| ACAN aggrecan isoform 2 precursor                                   | IPI00027377      | 250 kDa          | 38   | 30   | 17   | 28   | 34    | 24    | 34      | 22   | 29   | 0.4877     | 0.5109      | 1.3    | 0.8 |        |         |
| ACE Isoform Somatic-1 of Angiotensin-converting enzyme, IPI00437751 | IPI00437751      | 150 kDa          | 48   | 34   | 67   | 56   | 28    | 38    | 41      | 61   | 33   | 0.0600     | 0.4301      | 0.5    | 0.8 |        |         |
| ACE2 Isoform 1 of Angiotensin-converting enzyme 2 precu             | IPI00465187      | 92 kDa           | 11   | 16   | 20   | 30   | 4     | 5     | 13      | 25   | 5    | 0.0557     | 0.0847      | 0.2    | 0.4 |        |         |
| ACO1 Cytoplasmic aconitate hydratase                                | IPI00008485      | 98 kDa           | 2    | 2    | 0    | 0    | 0     | 0     | 2       | 0    | 0    | -          | 0.0081      | -      | 0.0 |        |         |
| ACP2 Lysosomal acid phosphatase precursor                           | IPI00003807      | 48 kDa           | 48   | 49   | 56   | 48   | 26    | 20    | 48      | 52   | 23   | 0.0318     | 0.0145      | 0.5    | 0.5 |        |         |
| ACPP ACPP protein                                                   | IPI00289983      | 48 kDa           | 85   | 101  | 136  | 143  | 46    | 36    | 93      | 139  | 41   | 0.0038     | 0.0309      | 0.3    | 0.4 |        |         |
| ACSL4 Isoform Long of Long-chain-fatty-acid--CoA ligase 4           | IPI00029737      | 79 kDa           | 1    | 3    | 0    | 1    | 1     | 1     | 2       | 1    | 1    | 0.3863     | 0.3777      | 2.1    | 0.5 |        |         |
| ACTG1 Actin, cytoplasmic 2                                          | IPI00021440      | 42 kDa           | 126  | 129  | 161  | 112  | 75    | 77    | 127     | 136  | 76   | 0.1338     | 0.0015      | 0.6    | 0.6 |        |         |
| ACTN4 Alpha-actinin-4                                               | IPI00013808      | 105 kDa          | 20   | 31   | 36   | 29   | 1     | 5     | 26      | 32   | 3    | 0.0191     | 0.0592      | 0.1    | 0.1 |        |         |
| ACTR2 Actin-related protein 2                                       | IPI00005159      | 45 kDa           | 2    | 3    | 0    | 3    | 0     | 0     | 3       | 2    | 0    | 0.4226     | 0.0122      | 0.0    | 0.0 |        |         |
| ACTR3 Actin-related protein 3                                       | IPI00028091      | 47 kDa           | 4    | 2    | 2    | 4    | 0     | 0     | 3       | 3    | 0    | 0.0905     | 0.0727      | 0.0    | 0.0 |        |         |
| ACVR1B Isoform 1 of Activin receptor type-1B precursor              | IPI00005732      | 57 kDa           | 22   | 19   | 15   | 20   | 12    | 13    | 20      | 17   | 12   | 0.1922     | 0.0286      | 0.7    | 0.6 |        |         |
| ACY1 Aminoacylase-1                                                 | IPI00009268      | 46 kDa           | 22   | 13   | 22   | 19   | 3     | 2     | 17      | 20   | 3    | 0.0112     | 0.0781      | 0.1    | 0.2 |        |         |
| ACY3 Aspartoacylase-2                                               | IPI00063025      | 35 kDa           | 1    | 2    | 4    | 3    | 0     | 0     | 2       | 4    | 0    | 0.0229     | 0.0574      | 0.0    | 0.0 |        |         |
| ADAMTSL2 ADAMTS-like protein 2 precursor                            | IPI00644346      | 105 kDa          | 7    | 9    | 5    | 7    | 0     | 0     | 8       | 6    | 0    | 0.0234     | 0.0122      | 0.0    | 0.0 |        |         |
| ADH5 Alcohol dehydrogenase class-3                                  | IPI00746777      | 40 kDa           | 2    | 0    | 3    | 2    | 0     | 1     | 1       | 3    | 1    | 0.1136     | 0.6642      | 0.2    | 0.4 |        |         |
| ADM ADM precursor                                                   | IPI00017968      | 20 kDa           | 2    | 0    | 0    | 0    | 0     | 0     | 1       | 0    | 0    | -          | 0.4226      | -      | 0.0 |        |         |
| AFM Afamin precursor                                                | IPI00019943      | 69 kDa           | 36   | 43   | 26   | 27   | 86    | 69    | 39      | 27   | 77   | 0.0275     | 0.0551      | 2.9    | 2.0 |        |         |
| AGA N                                                               | IPI00026259      | 37 kDa           | 12   | 17   | 3    | 3    | 10    | 6     | 14      | 3    | 8    | 0.1008     | 0.1735      | 2.6    | 0.6 |        |         |
| AGRN Agrin precursor                                                | IPI00374563      | 215 kDa          | 129  | 111  | 50   | 49   | 39    | 62    | 120     | 49   | 50   | 0.9305     | 0.0434      | 1.0    | 0.4 |        |         |
| AGT Angiotensinogen precursor                                       | IPI00032220      | 53 kDa           | 17   | 11   | 28   | 34   | 26    | 16    | 14      | 31   | 21   | 0.2579     | 0.3390      | 0.7    | 1.5 |        |         |
| AHCY Adenosylhomocysteinase                                         | IPI00012007      | 48 kDa           | 11   | 10   | 8    | 11   | 1     | 1     | 10      | 10   | 1    | 0.0261     | 0.0018      | 0.1    | 0.1 |        |         |
| AHSG Alpha-2-HS-glycoprotein precursor                              | IPI00022431      | 39 kDa           | 121  | 115  | 143  | 146  | 224   | 244   | 118     | 144  | 234  | 0.0116     | 0.0075      | 1.6    | 2.0 |        |         |
| AKR1A1 Alcohol dehydrogenase                                        | IPI00220271      | 37 kDa           | 14   | 11   | 13   | 21   | 8     | 5     | 13      | 17   | 7    | 0.1347     | 0.0958      | 0.4    | 0.5 |        |         |
| AKR1B1 Aldose reductase                                             | IPI00413641      | 36 kDa           | 13   | 10   | 12   | 11   | 6     | 6     | 12      | 12   | 6    | 0.0076     | 0.0774      | 0.5    | 0.5 |        |         |
| AKR1C3 Aldo-keto reductase family 1 member C3                       | IPI00291483      | 37 kDa           | 1    | 2    | 1    | 1    | 0     | 0     | 2       | 1    | 0    | 0.0001     | 0.0574      | 0.0    | 0.0 |        |         |
| AKR7A2 Aflatoxin B1 aldehyde reductase member 2                     | IPI00305978      | 40 kDa           | 2    | 1    | 2    | 0    | 0     | 0     | 2       | 1    | 0    | 0.4226     | 0.1357      | 0.0    | 0.0 |        |         |
| ALAD delta-aminolevulinic acid dehydratase isoform a                | IPI00442121      | 39 kDa           | 2    | 3    | 1    | 1    | 0     | 0     | 3       | 1    | 0    | 0.0001     | 0.0122      | 0.0    | 0.0 |        |         |
| ALB Isoform 1 of Serum albumin precursor                            | IPI00745872      | 69 kDa           | 2741 | 3015 | 2844 | 2517 | 4574  | 3838  | 2878    | 2681 | 4206 | 0.0632     | 0.0775      | 1.6    | 1.5 |        |         |
| ALDH1A1 Retinal dehydrogenase 1                                     | IPI00218914      | 55 kDa           | 8    | 11   | 10   | 18   | 7     | 11    | 10      | 14   | 9    | 0.3930     | 0.7148      | 0.6    | 0.9 |        |         |
| ALDH1L1 10-formyltetrahydrofolate dehydrogenase                     | IPI00290553      | 99 kDa           | 2    | 6    | 0    | 0    | 0     | 0     | 4       | 0    | 0    | -          | 0.1450      | -      | 0.0 |        |         |
| ALDH7A1 aldehyde dehydrogenase 7 family, member A1                  | IPI00221234      | 58 kDa           | 5    | 3    | 0    | 0    | 0     | 0     | 4       | 0    | 0    | -          | 0.0492      | -      | 0.0 |        |         |
| ALDH9A1 aldehyde dehydrogenase 9A1                                  | IPI00479877      | 56 kDa           | 2    | 2    | 0    | 4    | 0     | 1     | 2       | 2    | 1    | 0.5478     | 0.1010      | 0.3    | 0.2 |        |         |
| ALDOA Fructose-bisphosphate aldolase A                              | IPI00465439      | 39 kDa           | 13   | 14   | 13   | 14   | 4     | 0     | 14      | 14   | 2    | 0.0408     | 0.0365      | 0.2    | 0.2 |        |         |

|                                                                           |             |         |      |      |      |      |      |      |      |      |      |        |        |     |      |
|---------------------------------------------------------------------------|-------------|---------|------|------|------|------|------|------|------|------|------|--------|--------|-----|------|
| ALDOB Fructose-bisphosphate aldolase B                                    | IPI00218407 | 39 kDa  | 48   | 54   | 36   | 55   | 24   | 19   | 51   | 45   | 22   | 0.1358 | 0.0172 | 0.5 | 0.4  |
| AMBP AMBP protein precursor                                               | IPI00022426 | 39 kDa  | 1303 | 1189 | 1154 | 1360 | 2204 | 2385 | 1246 | 1257 | 2295 | 0.0171 | 0.0103 | 1.8 | 1.8  |
| AMICA1 Isoform 2 of Junctional adhesion molecule-like protein 1 precursor | IPI00183703 | 43 kDa  | 0    | 1    | 0    | 3    | 0    | 0    | 1    | 2    | 0    | 0.4226 | 0.4226 | 0.0 | 0.0  |
| AMY1A;AMY1B;AMY1C;AMY2A Alpha-amylase 1 precursor                         | IPI00300786 | 58 kDa  | 378  | 404  | 179  | 202  | 162  | 181  | 391  | 190  | 172  | 0.3384 | 0.0056 | 0.9 | 0.4  |
| AMY1A;AMY1B;AMY1C;AMY2A Pancreatic alpha-amylase 1 precursor              | IPI00025476 | 58 kDa  | 441  | 475  | 188  | 204  | 188  | 203  | 458  | 196  | 196  | 0.9534 | 0.0049 | 1.0 | 0.4  |
| AMY2B Alpha-amylase 2B precursor                                          | IPI00021447 | 58 kDa  | 378  | 406  | 178  | 194  | 157  | 176  | 392  | 186  | 167  | 0.2590 | 0.0056 | 0.9 | 0.4  |
| ANG Angiogenin precursor                                                  | IPI00008554 | 17 kDa  | 5    | 4    | 4    | 9    | 1    | 0    | 4    | 7    | 1    | 0.1389 | 0.0298 | 0.1 | 0.1  |
| ANGPTL2 Angiotensin-related protein 2 precursor                           | IPI00007800 | 57 kDa  | 41   | 39   | 42   | 39   | 9    | 4    | 40   | 41   | 7    | 0.0062 | 0.0052 | 0.2 | 0.2  |
| ANPEP Aminopeptidase N                                                    | IPI00221224 | 110 kDa | 360  | 373  | 323  | 391  | 275  | 291  | 366  | 357  | 283  | 0.1688 | 0.0151 | 0.8 | 0.8  |
| ANTXR1 Isoform 1 of Anthrax toxin receptor 1 precursor                    | IPI00030431 | 63 kDa  | 12   | 10   | 12   | 18   | 7    | 11   | 11   | 15   | 9    | 0.2419 | 0.4172 | 0.6 | 0.8  |
| ANXA1 Annexin A1                                                          | IPI00218918 | 39 kDa  | 6    | 3    | 17   | 19   | 1    | 1    | 4    | 18   | 1    | 0.0026 | 0.1505 | 0.1 | 0.2  |
| ANXA11 Annexin A11                                                        | IPI00414320 | 54 kDa  | 16   | 17   | 29   | 29   | 19   | 20   | 16   | 29   | 20   | 0.0087 | 0.0979 | 0.7 | 1.2  |
| ANXA2 Annexin A2                                                          | IPI00455315 | 39 kDa  | 25   | 16   | 32   | 25   | 22   | 19   | 21   | 28   | 21   | 0.1757 | 0.9889 | 0.7 | 1.0  |
| ANXA3 Annexin A3                                                          | IPI00024095 | 36 kDa  | 4    | 2    | 7    | 2    | 0    | 0    | 3    | 5    | 0    | 0.2179 | 0.0727 | 0.0 | 0.0  |
| ANXA4 annexin IV                                                          | IPI00793199 | 36 kDa  | 8    | 13   | 3    | 4    | 4    | 1    | 11   | 4    | 3    | 0.6479 | 0.1073 | 0.7 | 0.3  |
| ANXA5 Annexin A5                                                          | IPI00329801 | 36 kDa  | 8    | 9    | 2    | 1    | 6    | 1    | 9    | 2    | 3    | 0.5312 | 0.1366 | 2.1 | 0.4  |
| ANXA6 annexin VI isoform 2                                                | IPI00002459 | 75 kDa  | 17   | 12   | 2    | 2    | 1    | 0    | 14   | 2    | 1    | 0.1071 | 0.0300 | 0.3 | 0.0  |
| ANXA7 Isoform 1 of Annexin A7                                             | IPI00002460 | 53 kDa  | 5    | 5    | 1    | 9    | 4    | 5    | 5    | 5    | 5    | 0.9484 | 0.9805 | 0.9 | 1.0  |
| AOX1 aldehyde oxidase 1                                                   | IPI00872655 | 148 kDa | 14   | 19   | 16   | 20   | 0    | 0    | 17   | 18   | 0    | 0.0112 | 0.0186 | 0.0 | 0.0  |
| APCS Serum amyloid P-component precursor                                  | IPI00022391 | 25 kDa  | 5    | 4    | 4    | 5    | 2    | 3    | 4    | 5    | 3    | 0.1026 | 0.1209 | 0.6 | 0.6  |
| APEH Acylamino-acid-releasing enzyme                                      | IPI00337741 | 81 kDa  | 1    | 4    | 2    | 2    | 0    | 0    | 3    | 2    | 0    | 0.0001 | 0.2046 | 0.0 | 0.0  |
| APLP2 Isoform 1 of Amyloid-like protein 2 precursor                       | IPI00031030 | 87 kDa  | 16   | 24   | 3    | 2    | 3    | 4    | 20   | 3    | 4    | 0.2551 | 0.0635 | 1.4 | 0.2  |
| APOA1 Apolipoprotein A-I precursor                                        | IPI00021841 | 31 kDa  | 52   | 43   | 58   | 67   | 9    | 3    | 47   | 63   | 6    | 0.0087 | 0.0150 | 0.1 | 0.1  |
| APOA2 Apolipoprotein A-II precursor                                       | IPI00021854 | 11 kDa  | 4    | 14   | 19   | 11   | 8    | 3    | 9    | 15   | 5    | 0.1591 | 0.6154 | 0.4 | 0.6  |
| APOA4 Apolipoprotein A-IV precursor                                       | IPI00304273 | 45 kDa  | 19   | 19   | 30   | 34   | 4    | 0    | 19   | 32   | 2    | 0.0111 | 0.0166 | 0.1 | 0.1  |
| APOD Apolipoprotein D precursor                                           | IPI00006662 | 21 kDa  | 331  | 294  | 383  | 345  | 256  | 253  | 312  | 364  | 255  | 0.0300 | 0.0897 | 0.7 | 0.8  |
| APOE Apolipoprotein E precursor                                           | IPI00021842 | 36 kDa  | 56   | 57   | 19   | 28   | 8    | 12   | 57   | 24   | 10   | 0.1069 | 0.0020 | 0.4 | 0.2  |
| APOH Beta-2-glycoprotein 1 precursor                                      | IPI00298828 | 38 kDa  | 74   | 58   | 55   | 59   | 81   | 94   | 66   | 57   | 88   | 0.0453 | 0.1726 | 1.5 | 1.3  |
| APOM Apolipoprotein M                                                     | IPI00030739 | 21 kDa  | 7    | 3    | 1    | 2    | 6    | 1    | 5    | 2    | 3    | 0.5273 | 0.6131 | 2.1 | 0.6  |
| APP Isoform APP770 of Amyloid beta A4 protein precursor                   | IPI00006608 | 87 kDa  | 53   | 54   | 24   | 31   | 34   | 31   | 53   | 28   | 33   | 0.3123 | 0.0060 | 1.2 | 0.6  |
| AQP1 Aquaporin-1                                                          | IPI00024689 | 29 kDa  | 4    | 4    | 3    | 7    | 0    | 0    | 4    | 5    | 0    | 0.1246 | 0.0028 | 0.0 | 0.0  |
| AQP2 Aquaporin-2                                                          | IPI00012818 | 29 kDa  | 1    | 1    | 2    | 9    | 21   | 18   | 1    | 6    | 20   | 0.0688 | 0.0052 | 3.4 | 17.8 |
| ARF1 ADP-ribosylation factor 1                                            | IPI00215914 | 21 kDa  | 12   | 8    | 6    | 8    | 3    | 2    | 10   | 7    | 3    | 0.0549 | 0.0728 | 0.4 | 0.3  |
| ARF6 ADP-ribosylation factor 6                                            | IPI00215920 | 20 kDa  | 4    | 7    | 2    | 4    | 3    | 2    | 5    | 3    | 3    | 0.7609 | 0.2883 | 0.9 | 0.5  |
| ARG1 Isoform 1 of Arginase-1                                              | IPI00291560 | 35 kDa  | 0    | 0    | 0    | 3    | 0    | 0    | 0    | 2    | 0    | 0.4226 | -      | 0.0 | -    |
| ARHGDI1 Rho GDP-dissociation inhibitor 1                                  | IPI00003815 | 23 kDa  | 2    | 3    | 1    | 2    | 0    | 0    | 3    | 2    | 0    | 0.0905 | 0.0122 | 0.0 | 0.0  |
| ARHGDI2 Rho GDP-dissociation inhibitor 2                                  | IPI00003817 | 23 kDa  | 0    | 1    | 2    | 1    | 0    | 0    | 1    | 2    | 0    | 0.1004 | 0.4226 | 0.0 | 0.0  |
| ARHGEF10L Isoform 2 of Rho guanine nucleotide exchange factor 10L         | IPI00478817 | 136 kDa | 0    | 4    | 0    | 0    | 0    | 0    | 2    | 0    | 0    | -      | 0.4226 | -   | 0.0  |
| ARL8B ADP-ribosylation factor-like protein 8B                             | IPI00018871 | 22 kDa  | 1    | 2    | 0    | 1    | 0    | 0    | 2    | 1    | 0    | 0.4226 | 0.0574 | 0.0 | 0.0  |
| ARPC3 Actin-related protein 2/3 complex subunit 3                         | IPI00005162 | 21 kDa  | 4    | 1    | 3    | 5    | 0    | 0    | 2    | 4    | 0    | 0.0528 | 0.2187 | 0.0 | 0.0  |
| ARRDC1 Arrestin domain-containing protein 1                               | IPI00166858 | 46 kDa  | 1    | 1    | 0    | 1    | 2    | 2    | 1    | 1    | 2    | 0.0856 | 0.0091 | 4.2 | 2.0  |
| ARSA Putative uncharacterized protein DKFZp686G12235                      | IPI00329685 | 54 kDa  | 37   | 37   | 42   | 40   | 15   | 20   | 37   | 41   | 18   | 0.0128 | 0.0165 | 0.4 | 0.5  |
| ARSB Arylsulfatase B precursor                                            | IPI00306576 | 60 kDa  | 2    | 7    | 2    | 4    | 2    | 2    | 5    | 3    | 2    | 0.4446 | 0.3870 | 0.7 | 0.5  |
| ARSF Arylsulfatase F precursor                                            | IPI00008405 | 66 kDa  | 1    | 2    | 0    | 0    | 0    | 0    | 2    | 0    | 0    | -      | 0.0574 | -   | 0.0  |
| ART1 GPI-linked NAD                                                       | IPI00006067 | 36 kDa  | 0    | 0    | 2    | 3    | 0    | 0    | 0    | 3    | 0    | 0.0340 | -      | 0.0 | -    |
| ART3 Isoform 3 of Ecto-ADP-ribosyltransferase 3 precursor                 | IPI00013682 | 44 kDa  | 0    | 0    | 0    | 0    | 2    | 0    | 0    | 0    | 1    | 0.4226 | 0.4226 | -   | -    |
| ASAH1 Acid ceramidase precursor                                           | IPI00013698 | 45 kDa  | 42   | 44   | 33   | 27   | 43   | 30   | 43   | 30   | 36   | 0.4486 | 0.4232 | 1.2 | 0.8  |

|                                                             |             |         |     |     |     |     |     |     |     |     |     |        |        |     |     |
|-------------------------------------------------------------|-------------|---------|-----|-----|-----|-----|-----|-----|-----|-----|-----|--------|--------|-----|-----|
| ASAM Adipocyte adhesion molecule precursor                  | IPI00024929 | 41 kDa  | 0   | 2   | 2   | 2   | 0   | 0   | 1   | 2   | 0   | 0.0001 | 0.4226 | 0.0 | 0.0 |
| ASL Argininosuccinate lyase                                 | IPI00220267 | 52 kDa  | 0   | 1   | 2   | 0   | 0   | 0   | 1   | 1   | 0   | 0.4226 | 0.4226 | 0.0 | 0.0 |
| ASS1 Argininosuccinate synthase                             | IPI00020632 | 51 kDa  | 16  | 16  | 6   | 9   | 0   | 2   | 16  | 8   | 1   | 0.0661 | 0.0055 | 0.1 | 0.1 |
| ATP1A1 Isoform Long of Sodium/potassium-transporting A      | IPI00006482 | 113 kDa | 7   | 12  | 0   | 0   | 1   | 2   | 10  | 0   | 2   | 0.0901 | 0.0834 | -   | 0.2 |
| ATP1B1 Isoform 1 of Sodium/potassium-transporting ATPa      | IPI00747849 | 35 kDa  | 2   | 1   | 0   | 0   | 0   | 0   | 2   | 0   | 0   | -      | 0.1357 | -   | 0.0 |
| ATP5B ATP synthase subunit beta, mitochondrial precursor    | IPI00303476 | 57 kDa  | 2   | 0   | 0   | 0   | 0   | 0   | 1   | 0   | 0   | -      | 0.4226 | -   | 0.0 |
| ATP6AP1 Vacuolar ATP synthase subunit S1 precursor          | IPI00784119 | 52 kDa  | 6   | 1   | 4   | 6   | 0   | 0   | 3   | 5   | 0   | 0.0340 | 0.2964 | 0.0 | 0.0 |
| ATP6AP2 Renin receptor precursor                            | IPI00168884 | 39 kDa  | 5   | 7   | 3   | 5   | 0   | 0   | 6   | 4   | 0   | 0.0528 | 0.0332 | 0.0 | 0.0 |
| ATP6V0A4 Vacuolar proton translocating ATPase 116 kDa s     | IPI00009852 | 96 kDa  | 1   | 2   | 0   | 0   | 0   | 0   | 2   | 0   | 0   | -      | 0.0574 | -   | 0.0 |
| ATP6V0D1 Vacuolar proton pump subunit d 1                   | IPI00034159 | 40 kDa  | 1   | 0   | 1   | 0   | 2   | 0   | 1   | 1   | 1   | 0.6862 | 0.7280 | 2.1 | 1.8 |
| ATP6V1A Vacuolar ATP synthase catalytic subunit A           | IPI00007682 | 68 kDa  | 1   | 4   | 1   | 1   | 0   | 0   | 3   | 1   | 0   | 0.0001 | 0.2046 | 0.0 | 0.0 |
| ATP6V1B1 Vacuolar ATP synthase subunit B, kidney isoform    | IPI00304911 | 57 kDa  | 2   | 3   | 0   | 0   | 3   | 1   | 3   | 0   | 2   | 0.1885 | 0.7007 | -   | 0.8 |
| ATP6V1E1 Vacuolar proton pump subunit E 1                   | IPI00003856 | 26 kDa  | 0   | 3   | 0   | 0   | 1   | 0   | 2   | 0   | 1   | 0.4226 | 0.6125 | -   | 0.4 |
| ATP6V1G1 Vacuolar proton pump subunit G 1                   | IPI00025285 | 14 kDa  | 4   | 3   | 0   | 2   | 1   | 0   | 3   | 1   | 1   | 0.7192 | 0.0481 | 0.5 | 0.2 |
| ATRN Isoform 2 of Attractin precursor                       | IPI00162735 | 141 kDa | 270 | 256 | 274 | 306 | 243 | 274 | 263 | 290 | 258 | 0.2871 | 0.8162 | 0.9 | 1.0 |
| AXL AXL receptor tyrosine kinase isoform 1                  | IPI00296992 | 98 kDa  | 60  | 55  | 51  | 42  | 69  | 60  | 57  | 47  | 65  | 0.1009 | 0.3000 | 1.4 | 1.1 |
| AZGP1 alpha-2-glycoprotein 1, zinc                          | IPI00166729 | 34 kDa  | 336 | 273 | 327 | 347 | 734 | 785 | 304 | 337 | 759 | 0.0041 | 0.0078 | 2.3 | 2.5 |
| AZU1 Azurocidin precursor                                   | IPI00022246 | 27 kDa  | 0   | 0   | 13  | 6   | 0   | 0   | 0   | 9   | 0   | 0.1004 | -      | 0.0 | -   |
| B3GNT1 N-acetyllactosaminide beta-1,3-N-acetylglucosam      | IPI00009997 | 47 kDa  | 16  | 11  | 6   | 13  | 4   | 2   | 13  | 10  | 3   | 0.2171 | 0.0593 | 0.3 | 0.2 |
| B4GALT1 Isoform Long of Beta-1,4-galactosyltransferase 1    | IPI00215767 | 44 kDa  | 2   | 3   | 5   | 4   | 1   | 0   | 3   | 5   | 1   | 0.0347 | 0.0756 | 0.1 | 0.2 |
| BAIAP2 Isoform 5 of Brain-specific angiogenesis inhibitor 1 | IPI00180292 | 57 kDa  | 0   | 1   | 0   | 0   | 0   | 2   | 1   | 0   | 1   | 0.4226 | 0.6760 | -   | 2.1 |
| BAMBI BMP and activin membrane-bound inhibitor homol        | IPI00011899 | 29 kDa  | 5   | 4   | 5   | 3   | 4   | 4   | 4   | 4   | 4   | 0.9054 | 0.9116 | 1.0 | 1.0 |
| BASP1 Brain acid soluble protein 1                          | IPI00299024 | 23 kDa  | 2   | 8   | 5   | 7   | 12  | 9   | 5   | 6   | 10  | 0.1799 | 0.2599 | 1.6 | 2.0 |
| BBOX1 Gamma-butyrobetaine dioxygenase                       | IPI00027416 | 45 kDa  | 1   | 2   | 2   | 4   | 0   | 0   | 2   | 3   | 0   | 0.0905 | 0.0574 | 0.0 | 0.0 |
| BCAM Lutheran blood group glycoprotein precursor            | IPI00002406 | 67 kDa  | 31  | 34  | 31  | 25  | 1   | 3   | 33  | 28  | 2   | 0.0145 | 0.0034 | 0.1 | 0.1 |
| BDH2 Isoform 1 of 3-hydroxybutyrate dehydrogenase type      | IPI00607799 | 27 kDa  | 5   | 4   | 2   | 1   | 1   | 1   | 4   | 2   | 1   | 0.4612 | 0.0142 | 0.7 | 0.2 |
| BGN Biglycan precursor                                      | IPI00010790 | 42 kDa  | 20  | 30  | 17  | 23  | 8   | 6   | 25  | 20  | 7   | 0.0504 | 0.0648 | 0.4 | 0.3 |
| BHMT Betaine--homocysteine S-methyltransferase 1            | IPI00004101 | 45 kDa  | 34  | 31  | 14  | 11  | 2   | 4   | 32  | 13  | 3   | 0.0276 | 0.0032 | 0.3 | 0.1 |
| BID Isoform 1 of BH3-interacting domain death agonist       | IPI00413587 | 22 kDa  | 7   | 2   | 4   | 4   | 0   | 1   | 5   | 4   | 1   | 0.0211 | 0.2654 | 0.1 | 0.1 |
| BSG Isoform 2 of Basigin precursor                          | IPI00019906 | 29 kDa  | 11  | 9   | 5   | 8   | 6   | 11  | 10  | 7   | 8   | 0.7021 | 0.5863 | 1.2 | 0.8 |
| BST1 ADP-ribosyl cyclase 2 precursor                        | IPI00026240 | 36 kDa  | 7   | 4   | 4   | 4   | 8   | 3   | 6   | 4   | 5   | 0.6274 | 0.9652 | 1.3 | 1.0 |
| BTD biotinidase precursor                                   | IPI00218413 | 61 kDa  | 35  | 42  | 36  | 39  | 45  | 19  | 38  | 38  | 32  | 0.7156 | 0.6903 | 0.9 | 0.8 |
| BTN2A1 butyrophilin, subfamily 2, member A1 isoform 2 p     | IPI00019862 | 38 kDa  | 73  | 58  | 46  | 43  | 34  | 21  | 66  | 45  | 28  | 0.1207 | 0.0619 | 0.6 | 0.4 |
| BTNL3 Isoform 2 of Butyrophilin-like protein 3 precursor    | IPI00009151 | 48 kDa  | 2   | 1   | 4   | 2   | 0   | 0   | 2   | 3   | 0   | 0.1004 | 0.1357 | 0.0 | 0.0 |
| C11orf52 Uncharacterized protein C11orf52                   | IPI00059185 | 14 kDa  | 2   | 2   | 2   | 0   | 1   | 0   | 2   | 1   | 1   | 0.7113 | 0.1062 | 0.5 | 0.3 |
| C11orf54 Isoform 1 of Ester hydrolase C11orf54              | IPI00072044 | 35 kDa  | 19  | 18  | 14  | 8   | 7   | 5   | 19  | 11  | 6   | 0.2148 | 0.0046 | 0.5 | 0.3 |
| C17orf37 Uncharacterized protein C17orf37                   | IPI00878073 | 12 kDa  | 4   | 4   | 2   | 3   | 6   | 4   | 4   | 3   | 5   | 0.0994 | 0.2263 | 1.9 | 1.3 |
| C17orf61 UPF0451 protein C17orf61 precursor                 | IPI00166483 | 12 kDa  | 4   | 4   | 0   | 0   | 0   | 0   | 4   | 0   | 0   | -      | 0.0028 | -   | 0.0 |
| C19orf10 UPF0556 protein C19orf10 precursor                 | IPI00056357 | 19 kDa  | 2   | 8   | 7   | 0   | 6   | 8   | 5   | 4   | 7   | 0.5416 | 0.7031 | 1.8 | 1.3 |
| C1orf58 BRO1 domain-containing protein BROX                 | IPI00065500 | 46 kDa  | 20  | 19  | 16  | 9   | 11  | 15  | 20  | 13  | 13  | 0.9241 | 0.0884 | 1.0 | 0.7 |
| C1orf68;LOC100129271 Skin-specific protein 32               | IPI00023078 | 26 kDa  | 8   | 6   | 5   | 2   | 0   | 2   | 7   | 4   | 1   | 0.3103 | 0.0625 | 0.3 | 0.1 |
| C1R Complement C1r subcomponent precursor                   | IPI00296165 | 80 kDa  | 4   | 7   | 8   | 10  | 4   | 1   | 5   | 9   | 3   | 0.0731 | 0.3944 | 0.3 | 0.5 |
| C1RL Complement C1r subcomponent-like protein precurs       | IPI00009793 | 53 kDa  | 61  | 63  | 54  | 57  | 70  | 49  | 62  | 55  | 60  | 0.7174 | 0.8559 | 1.1 | 1.0 |
| C1S Complement C1s subcomponent precursor                   | IPI00017696 | 77 kDa  | 6   | 7   | 6   | 7   | 6   | 4   | 6   | 7   | 5   | 0.1268 | 0.1786 | 0.7 | 0.8 |
| C2 Complement C2 precursor (Fragment)                       | IPI00303963 | 83 kDa  | 2   | 6   | 4   | 4   | 1   | 2   | 4   | 4   | 2   | 0.0395 | 0.3034 | 0.4 | 0.4 |
| C20orf114 Isoform 1 of Long palate, lung and nasal epithel  | IPI00291410 | 52 kDa  | 0   | 0   | 1   | 3   | 0   | 0   | 0   | 2   | 0   | 0.1789 | -      | 0.0 | -   |
| C3 Complement C3 precursor (Fragment)                       | IPI00783987 | 187 kDa | 103 | 119 | 157 | 155 | 39  | 26  | 111 | 156 | 32  | 0.0027 | 0.0162 | 0.2 | 0.3 |

|                                                           |             |         |     |    |     |     |     |     |     |     |     |        |        |     |      |
|-----------------------------------------------------------|-------------|---------|-----|----|-----|-----|-----|-----|-----|-----|-----|--------|--------|-----|------|
| C4B complement component 4B preproprotein                 | IPI00418163 | 193 kDa | 95  | 82 | 122 | 116 | 41  | 34  | 88  | 119 | 38  | 0.0028 | 0.0190 | 0.3 | 0.4  |
| C5 Complement C5 precursor                                | IPI00032291 | 188 kDa | 7   | 11 | 2   | 2   | 0   | 0   | 9   | 2   | 0   | 0.0001 | 0.0411 | 0.0 | 0.0  |
| C5orf15 Keratinocytes-associated transmembrane protein    | IPI00550571 | 29 kDa  | 0   | 0  | 5   | 0   | 0   | 0   | 0   | 3   | 0   | 0.4226 | -      | 0.0 | -    |
| C5orf32 UPF0467 protein C5orf32                           | IPI00382821 | 11 kDa  | 0   | 4  | 2   | 2   | 3   | 1   | 2   | 2   | 2   | 0.9411 | 0.9423 | 1.0 | 1.1  |
| C6 Complement component 6 precursor                       | IPI00879709 | 106 kDa | 4   | 6  | 8   | 6   | 1   | 1   | 5   | 7   | 1   | 0.0311 | 0.0908 | 0.1 | 0.2  |
| C6orf108 c-Myc-responsive protein Rcl                     | IPI00007926 | 19 kDa  | 1   | 2  | 0   | 2   | 0   | 1   | 2   | 1   | 1   | 0.7106 | 0.2534 | 0.5 | 0.3  |
| C6orf120 Uncharacterized protein C6orf120 precursor       | IPI00376035 | 21 kDa  | 2   | 2  | 3   | 4   | 1   | 0   | 2   | 4   | 1   | 0.0512 | 0.1062 | 0.2 | 0.3  |
| C7 Complement component C7 precursor                      | IPI00296608 | 94 kDa  | 40  | 31 | 25  | 38  | 32  | 26  | 35  | 32  | 29  | 0.7131 | 0.3459 | 0.9 | 0.8  |
| C7orf24 Uncharacterized protein C7orf24                   | IPI00031564 | 21 kDa  | 7   | 6  | 6   | 14  | 2   | 3   | 7   | 10  | 3   | 0.2008 | 0.0385 | 0.3 | 0.4  |
| C8G Complement component C8 gamma chain precursor         | IPI00011261 | 22 kDa  | 5   | 1  | 2   | 1   | 0   | 0   | 3   | 2   | 0   | 0.1004 | 0.2663 | 0.0 | 0.0  |
| C9 Complement component C9 precursor                      | IPI00022395 | 63 kDa  | 12  | 15 | 14  | 6   | 1   | 1   | 13  | 10  | 1   | 0.1425 | 0.0144 | 0.1 | 0.1  |
| C9orf58 Isoform 1 of Ionized calcium-binding adapter mole | IPI00034205 | 17 kDa  | 2   | 5  | 1   | 0   | 1   | 0   | 4   | 1   | 1   | 0.9809 | 0.1556 | 1.0 | 0.1  |
| CA1 Carbonic anhydrase 1                                  | IPI00215983 | 29 kDa  | 2   | 2  | 7   | 6   | 41  | 19  | 2   | 7   | 30  | 0.1626 | 0.1215 | 4.4 | 13.7 |
| CA2 Carbonic anhydrase 2                                  | IPI00218414 | 29 kDa  | 12  | 10 | 10  | 6   | 3   | 3   | 11  | 8   | 3   | 0.1089 | 0.0162 | 0.4 | 0.3  |
| CA4 Carbonic anhydrase 4 precursor                        | IPI00027466 | 35 kDa  | 6   | 4  | 0   | 0   | 1   | 1   | 5   | 0   | 1   | 0.0002 | 0.0593 | -   | 0.2  |
| CAB39 Calcium-binding protein 39                          | IPI00032561 | 40 kDa  | 12  | 5  | 10  | 5   | 10  | 5   | 8   | 7   | 8   | 0.9368 | 0.8556 | 1.0 | 0.9  |
| CACNA2D1 Dihydropyridine receptor alpha 2 subunit         | IPI00470535 | 125 kDa | 13  | 15 | 5   | 5   | 6   | 4   | 14  | 5   | 5   | 0.6335 | 0.0137 | 0.9 | 0.3  |
| CADM1 Isoform 1 of Cell adhesion molecule 1 precursor     | IPI00003813 | 49 kDa  | 22  | 32 | 25  | 16  | 36  | 14  | 27  | 20  | 25  | 0.7397 | 0.9053 | 1.2 | 0.9  |
| CADM3 Isoform 2 of Cell adhesion molecule 3 precursor     | IPI00009619 | 47 kDa  | 6   | 5  | 11  | 9   | 9   | 9   | 5   | 10  | 9   | 0.1903 | 0.0244 | 0.9 | 1.6  |
| CADM4 Cell adhesion molecule 4 precursor                  | IPI00176427 | 43 kDa  | 56  | 54 | 48  | 45  | 50  | 55  | 55  | 46  | 52  | 0.1861 | 0.3998 | 1.1 | 0.9  |
| CALB1 Calbindin                                           | IPI00220361 | 30 kDa  | 5   | 9  | 4   | 6   | 3   | 2   | 7   | 5   | 3   | 0.1605 | 0.1956 | 0.5 | 0.4  |
| CALM2;CALM1;CALM3 Calmodulin                              | IPI00075248 | 17 kDa  | 13  | 13 | 5   | 9   | 10  | 5   | 13  | 7   | 8   | 0.9235 | 0.1379 | 1.0 | 0.6  |
| CALML5 Calmodulin-like protein 5                          | IPI00021536 | 16 kDa  | 2   | 1  | 5   | 4   | 0   | 0   | 2   | 5   | 0   | 0.0146 | 0.1357 | 0.0 | 0.0  |
| CALR Calreticulin precursor                               | IPI00020599 | 48 kDa  | 2   | 3  | 7   | 5   | 4   | 0   | 3   | 6   | 2   | 0.2391 | 0.8433 | 0.3 | 0.8  |
| CALU Isoform 2 of Calumenin precursor                     | IPI00045396 | 37 kDa  | 4   | 2  | 0   | 1   | 0   | 0   | 3   | 1   | 0   | 0.4226 | 0.0727 | 0.0 | 0.0  |
| CAMP Cathelicidin antimicrobial peptide precursor         | IPI00292532 | 20 kDa  | 6   | 6  | 11  | 9   | 10  | 8   | 6   | 10  | 9   | 0.4546 | 0.1512 | 0.9 | 1.5  |
| CAND1 Isoform 1 of Cullin-associated NEDD8-dissociated p  | IPI00100160 | 136 kDa | 6   | 1  | 1   | 0   | 0   | 0   | 3   | 1   | 0   | 0.4226 | 0.2964 | 0.0 | 0.0  |
| CANT1 Isoform 1 of Soluble calcium-activated nucleotidase | IPI00103175 | 45 kDa  | 4   | 7  | 1   | 6   | 0   | 0   | 5   | 4   | 0   | 0.2937 | 0.0895 | 0.0 | 0.0  |
| CAP1 Adenylyl cyclase-associated protein 1                | IPI00008274 | 52 kDa  | 0   | 0  | 3   | 0   | 0   | 0   | 0   | 2   | 0   | 0.4226 | -      | 0.0 | -    |
| CAPG Macrophage-capping protein                           | IPI00027341 | 39 kDa  | 7   | 10 | 4   | 6   | 10  | 2   | 9   | 5   | 6   | 0.8599 | 0.5965 | 1.2 | 0.7  |
| CAPNS cDNA FLJ46245 fis, clone TEST14020596, highly simil | IPI00643994 | 77 kDa  | 4   | 6  | 3   | 1   | 1   | 2   | 5   | 2   | 2   | 0.7248 | 0.1364 | 0.8 | 0.3  |
| CAPN7 Calpain-7                                           | IPI00003765 | 93 kDa  | 7   | 15 | 6   | 4   | 11  | 3   | 11  | 5   | 7   | 0.6902 | 0.5448 | 1.4 | 0.6  |
| CAPNS1 Calpain small subunit 1                            | IPI00025084 | 28 kDa  | 1   | 1  | 1   | 2   | 0   | 0   | 1   | 2   | 0   | 0.0905 | 0.0081 | 0.0 | 0.0  |
| CAPZA2 F-actin-capping protein subunit alpha-2            | IPI00026182 | 33 kDa  | 4   | 0  | 0   | 1   | 1   | 0   | 2   | 1   | 1   | 0.9696 | 0.5751 | 1.1 | 0.3  |
| CASP14 Caspase-14 precursor                               | IPI00013885 | 28 kDa  | 8   | 10 | 37  | 42  | 0   | 0   | 9   | 40  | 0   | 0.0046 | 0.0075 | 0.0 | 0.0  |
| CAT Catalase                                              | IPI00465436 | 60 kDa  | 13  | 12 | 4   | 4   | 0   | 0   | 13  | 4   | 0   | 0.0001 | 0.0022 | 0.0 | 0.0  |
| CBR1 Carbonyl reductase [NADPH] 1                         | IPI00295386 | 30 kDa  | 6   | 6  | 1   | 1   | 0   | 0   | 6   | 1   | 0   | 0.0001 | 0.0000 | 0.0 | 0.0  |
| CD109 Isoform 1 of CD109 antigen precursor                | IPI00152540 | 162 kDa | 4   | 3  | 1   | 1   | 0   | 0   | 3   | 1   | 0   | 0.0001 | 0.0081 | 0.0 | 0.0  |
| CD14 Monocyte differentiation antigen CD14 precursor      | IPI00029260 | 40 kDa  | 98  | 95 | 134 | 121 | 175 | 147 | 97  | 128 | 161 | 0.1648 | 0.0444 | 1.3 | 1.7  |
| CD160 CD160 antigen precursor                             | IPI00296067 | 20 kDa  | 5   | 4  | 4   | 2   | 7   | 0   | 4   | 3   | 3   | 0.9700 | 0.7728 | 1.0 | 0.8  |
| CD163 Isoform 1 of Scavenger receptor cysteine-rich type  | IPI00104074 | 125 kDa | 2   | 3  | 2   | 1   | 6   | 0   | 3   | 2   | 3   | 0.7160 | 0.9868 | 1.7 | 1.0  |
| CD177 Isoform 1 of CD177 antigen precursor                | IPI00297444 | 46 kDa  | 5   | 1  | 4   | 2   | 1   | 2   | 3   | 3   | 2   | 0.3313 | 0.5838 | 0.5 | 0.6  |
| CD209 Isoform 1 of CD209 antigen                          | IPI00028136 | 46 kDa  | 1   | 3  | 2   | 4   | 2   | 4   | 2   | 3   | 3   | 0.9429 | 0.4933 | 1.0 | 1.5  |
| CD248 Isoform 1 of Endosialin precursor                   | IPI00006971 | 81 kDa  | 110 | 94 | 114 | 118 | 130 | 114 | 102 | 116 | 122 | 0.5653 | 0.2278 | 1.0 | 1.2  |
| CD27 CD27 antigen precursor                               | IPI00002435 | 29 kDa  | 30  | 28 | 16  | 18  | 26  | 44  | 29  | 17  | 35  | 0.1720 | 0.5551 | 2.1 | 1.2  |
| CD276 Isoform 1 of CD276 antigen precursor                | IPI00410488 | 57 kDa  | 17  | 16 | 14  | 14  | 15  | 13  | 16  | 14  | 14  | 0.9932 | 0.2306 | 1.0 | 0.9  |
| CD2AP CD2-associated protein                              | IPI00412771 | 71 kDa  | 6   | 3  | 1   | 0   | 2   | 1   | 4   | 1   | 2   | 0.2884 | 0.2157 | 3.1 | 0.4  |

|                                                                                    |             |         |     |     |     |     |     |     |     |     |     |        |        |     |     |
|------------------------------------------------------------------------------------|-------------|---------|-----|-----|-----|-----|-----|-----|-----|-----|-----|--------|--------|-----|-----|
| CD300A Isoform 1 of CMRF35-like molecule 8 precursor                               | IPI00414784 | 33 kDa  | 24  | 11  | 17  | 11  | 26  | 24  | 17  | 14  | 25  | 0.0732 | 0.3747 | 1.8 | 1.4 |
| CD300E Immune receptor expressed on myeloid cells 2                                | IPI00376457 | 26 kDa  | 2   | 2   | 0   | 1   | 7   | 1   | 2   | 1   | 4   | 0.3592 | 0.6143 | 7.4 | 1.7 |
| CD300LG Isoform 1 of CMRF35-like molecule 9 precursor                              | IPI00152018 | 36 kDa  | 80  | 64  | 88  | 106 | 79  | 58  | 72  | 97  | 69  | 0.1788 | 0.8148 | 0.7 | 1.0 |
| CD320 CD320 antigen precursor                                                      | IPI00641251 | 29 kDa  | 6   | 3   | 4   | 1   | 3   | 3   | 4   | 3   | 3   | 0.7338 | 0.4958 | 1.2 | 0.7 |
| CD33 Myeloid cell surface antigen CD33 precursor                                   | IPI00022203 | 40 kDa  | 8   | 8   | 11  | 5   | 1   | 1   | 8   | 8   | 1   | 0.1287 | 0.0008 | 0.1 | 0.1 |
| CD40 Isoform I of Tumor necrosis factor receptor superfamily 1B member 1 precursor | IPI00018282 | 31 kDa  | 2   | 2   | 1   | 2   | 4   | 2   | 2   | 2   | 3   | 0.3007 | 0.4467 | 2.1 | 1.5 |
| CD44 Isoform 12 of CD44 antigen precursor                                          | IPI00297160 | 39 kDa  | 179 | 168 | 127 | 134 | 160 | 192 | 173 | 130 | 176 | 0.1115 | 0.8965 | 1.3 | 1.0 |
| CD46 Isoform A of Membrane cofactor protein precursor                              | IPI00012035 | 44 kDa  | 0   | 0   | 1   | 0   | 1   | 4   | 0   | 1   | 3   | 0.3265 | 0.2333 | 5.1 | -   |
| CD55 Decay-accelerating factor splicing variant 4                                  | IPI00152418 | 56 kDa  | 79  | 71  | 127 | 97  | 163 | 148 | 75  | 112 | 155 | 0.1209 | 0.0107 | 1.4 | 2.1 |
| CD58 Isoform 1 of Lymphocyte function-associated antigen 3 precursor               | IPI00017529 | 28 kDa  | 11  | 5   | 8   | 9   | 10  | 9   | 8   | 9   | 9   | 0.6977 | 0.6940 | 1.0 | 1.2 |
| CD59 CD59 glycoprotein precursor                                                   | IPI00011302 | 14 kDa  | 263 | 249 | 202 | 225 | 256 | 327 | 256 | 213 | 292 | 0.1698 | 0.4233 | 1.4 | 1.1 |
| CD5L CD5 antigen-like precursor                                                    | IPI00025204 | 38 kDa  | 5   | 11  | 3   | 6   | 8   | 9   | 8   | 5   | 8   | 0.1607 | 0.9443 | 1.7 | 1.0 |
| CD63 CD63 antigen                                                                  | IPI00215998 | 26 kDa  | 22  | 15  | 12  | 16  | 10  | 11  | 18  | 14  | 10  | 0.2411 | 0.1381 | 0.8 | 0.6 |
| CD7 T-cell antigen CD7 precursor                                                   | IPI00015199 | 25 kDa  | 5   | 4   | 4   | 2   | 3   | 4   | 4   | 3   | 4   | 0.6428 | 0.4449 | 1.2 | 0.9 |
| CD84 Isoform 3 of SLAM family member 5 precursor                                   | IPI00022039 | 37 kDa  | 30  | 15  | 22  | 22  | 28  | 26  | 22  | 22  | 27  | 0.0360 | 0.6374 | 1.2 | 1.2 |
| CD9 CD9 antigen                                                                    | IPI00215997 | 25 kDa  | 12  | 14  | 14  | 14  | 6   | 11  | 13  | 14  | 8   | 0.1506 | 0.2240 | 0.6 | 0.6 |
| CD93 Complement component C1q receptor precursor                                   | IPI00299485 | 69 kDa  | 4   | 0   | 3   | 3   | 2   | 4   | 2   | 3   | 3   | 0.9287 | 0.5583 | 1.0 | 1.8 |
| CDC42 Isoform 2 of Cell division control protein 42 homolog 1 precursor            | IPI00016786 | 21 kDa  | 5   | 7   | 6   | 7   | 8   | 4   | 6   | 7   | 6   | 0.6934 | 0.9652 | 0.9 | 1.0 |
| CDH1 Epithelial cadherin precursor                                                 | IPI00025861 | 97 kDa  | 43  | 47  | 48  | 48  | 107 | 76  | 45  | 48  | 91  | 0.1028 | 0.0945 | 1.9 | 2.0 |
| CDH11 Isoform 2 of Cadherin-11 precursor                                           | IPI00293539 | 76 kDa  | 35  | 41  | 58  | 56  | 43  | 23  | 38  | 57  | 33  | 0.1408 | 0.6760 | 0.6 | 0.9 |
| CDH13 Cadherin-13 precursor                                                        | IPI00024046 | 78 kDa  | 38  | 38  | 50  | 53  | 51  | 64  | 38  | 51  | 58  | 0.4710 | 0.1073 | 1.1 | 1.5 |
| CDH15 Cadherin-15 precursor                                                        | IPI00024048 | 89 kDa  | 4   | 2   | 6   | 8   | 1   | 0   | 3   | 7   | 1   | 0.0259 | 0.1463 | 0.1 | 0.2 |
| CDH19 Cadherin-19 precursor                                                        | IPI00028135 | 87 kDa  | 8   | 8   | 8   | 2   | 1   | 0   | 8   | 5   | 1   | 0.2832 | 0.0058 | 0.1 | 0.1 |
| CDH2 Cadherin-2 precursor                                                          | IPI00290085 | 100 kDa | 35  | 33  | 31  | 25  | 53  | 45  | 34  | 28  | 49  | 0.0487 | 0.0628 | 1.8 | 1.4 |
| CDH3 Isoform 2 of Cadherin-3 precursor                                             | IPI00645614 | 87 kDa  | 7   | 6   | 3   | 5   | 0   | 0   | 7   | 4   | 0   | 0.0528 | 0.0081 | 0.0 | 0.0 |
| CDH5 Cadherin-5 precursor                                                          | IPI00012792 | 88 kDa  | 0   | 0   | 2   | 2   | 0   | 1   | 0   | 2   | 1   | 0.1012 | 0.4226 | 0.3 | -   |
| CDH6 Isoform 1 of Cadherin-6 precursor                                             | IPI00024035 | 88 kDa  | 11  | 8   | 19  | 18  | 10  | 13  | 9   | 18  | 11  | 0.0527 | 0.4311 | 0.6 | 1.2 |
| CEACAM5 Protein                                                                    | IPI00880101 | 76 kDa  | 0   | 0   | 15  | 9   | 0   | 0   | 0   | 12  | 0   | 0.0483 | -      | 0.0 | -   |
| CEACAM6 Carcinoembryonic antigen-related cell adhesion molecule 6 precursor        | IPI00027412 | 37 kDa  | 4   | 4   | 0   | 2   | 3   | 1   | 4   | 1   | 2   | 0.5278 | 0.2905 | 2.1 | 0.6 |
| CEACAM8 Carcinoembryonic antigen-related cell adhesion molecule 8 precursor        | IPI00013972 | 38 kDa  | 23  | 16  | 15  | 11  | 12  | 12  | 19  | 13  | 12  | 0.5733 | 0.1598 | 0.9 | 0.6 |
| CEL carboxyl ester lipase precursor                                                | IPI00099670 | 80 kDa  | 77  | 79  | 70  | 77  | 67  | 74  | 78  | 73  | 71  | 0.6377 | 0.1850 | 1.0 | 0.9 |
| CETP Isoform 1 of Cholesteryl ester transfer protein precursor                     | IPI00006173 | 55 kDa  | 6   | 7   | 23  | 25  | 2   | 0   | 6   | 24  | 1   | 0.0034 | 0.0467 | 0.0 | 0.2 |
| CFB Isoform 1 of Complement factor B precursor (Fragment B)                        | IPI00019591 | 86 kDa  | 35  | 30  | 48  | 59  | 19  | 23  | 32  | 53  | 21  | 0.0320 | 0.0616 | 0.4 | 0.6 |
| CFH Isoform 1 of Complement factor H precursor                                     | IPI00029739 | 139 kDa | 52  | 45  | 41  | 49  | 6   | 9   | 48  | 45  | 7   | 0.0109 | 0.0076 | 0.2 | 0.1 |
| CFHR1 Complement factor H-related protein 1 precursor                              | IPI00011264 | 38 kDa  | 28  | 31  | 24  | 30  | 20  | 9   | 29  | 27  | 14  | 0.1746 | 0.1236 | 0.5 | 0.5 |
| CFHR2 Isoform Long of Complement factor H-related protein 2 precursor              | IPI00006154 | 31 kDa  | 19  | 20  | 12  | 10  | 13  | 8   | 20  | 11  | 10  | 0.8463 | 0.0847 | 0.9 | 0.5 |
| CFI Complement factor I precursor                                                  | IPI00291867 | 66 kDa  | 59  | 53  | 50  | 30  | 34  | 26  | 56  | 40  | 30  | 0.4509 | 0.0361 | 0.8 | 0.5 |
| CFL1 Cofilin-1                                                                     | IPI00012011 | 19 kDa  | 12  | 10  | 6   | 5   | 2   | 6   | 11  | 6   | 4   | 0.5790 | 0.1042 | 0.7 | 0.4 |
| CHGA Chromogranin-A precursor                                                      | IPI00290315 | 51 kDa  | 6   | 5   | 13  | 6   | 7   | 4   | 5   | 9   | 5   | 0.3645 | 0.9721 | 0.6 | 1.0 |
| CHL1 Isoform 2 of Neural cell adhesion molecule L1-like protein 1 precursor        | IPI00299059 | 137 kDa | 115 | 130 | 108 | 92  | 41  | 56  | 123 | 100 | 48  | 0.0419 | 0.0198 | 0.5 | 0.4 |
| CHMP1B Charged multivesicular body protein 1b                                      | IPI00156984 | 22 kDa  | 11  | 4   | 3   | 1   | 2   | 5   | 7   | 2   | 4   | 0.4726 | 0.4368 | 1.8 | 0.5 |
| CHMP2A Charged multivesicular body protein 2a                                      | IPI00004416 | 25 kDa  | 7   | 8   | 7   | 3   | 3   | 1   | 8   | 5   | 2   | 0.3327 | 0.0447 | 0.4 | 0.3 |
| CHMP2B Charged multivesicular body protein 2b                                      | IPI00550181 | 24 kDa  | 7   | 4   | 2   | 1   | 0   | 3   | 6   | 2   | 2   | 0.9860 | 0.2208 | 1.0 | 0.3 |
| CHMP4B Charged multivesicular body protein 4b                                      | IPI00025974 | 25 kDa  | 7   | 8   | 4   | 4   | 2   | 4   | 8   | 4   | 3   | 0.4638 | 0.0605 | 0.8 | 0.4 |
| CHMP5 Charged multivesicular body protein 5                                        | IPI00100796 | 25 kDa  | 8   | 10  | 5   | 7   | 2   | 2   | 9   | 6   | 2   | 0.0524 | 0.0129 | 0.3 | 0.2 |
| CHODL Isoform 1 of Chondrolectin precursor                                         | IPI00017202 | 30 kDa  | 4   | 1   | 1   | 0   | 0   | 1   | 2   | 1   | 1   | 0.9932 | 0.3366 | 1.0 | 0.2 |
| CILP Cartilage intermediate layer protein 1 precursor                              | IPI00289275 | 133 kDa | 6   | 10  | 22  | 19  | 14  | 19  | 8   | 20  | 17  | 0.3616 | 0.1110 | 0.8 | 2.1 |

|                                                               |             |         |     |     |     |     |     |     |     |     |     |        |        |     |      |
|---------------------------------------------------------------|-------------|---------|-----|-----|-----|-----|-----|-----|-----|-----|-----|--------|--------|-----|------|
| CLP2 Cartilage intermediate layer protein 2 precursor         | IPI00216780 | 127 kDa | 8   | 4   | 26  | 25  | 0   | 0   | 6   | 26  | 0   | 0.0010 | 0.1060 | 0.0 | 0.0  |
| CKB Creatine kinase B-type                                    | IPI00022977 | 43 kDa  | 11  | 11  | 0   | 5   | 0   | 0   | 11  | 3   | 0   | 0.4226 | 0.0001 | 0.0 | 0.0  |
| CLEC14A C-type lectin domain family 14 member A precursor     | IPI00240345 | 52 kDa  | 13  | 18  | 43  | 28  | 10  | 6   | 16  | 36  | 8   | 0.0739 | 0.1292 | 0.2 | 0.5  |
| CLEC3B Tetranectin precursor                                  | IPI00009028 | 23 kDa  | 40  | 42  | 23  | 36  | 31  | 38  | 41  | 30  | 34  | 0.6061 | 0.2080 | 1.1 | 0.8  |
| CLEC4G C-type lectin domain family 4 member G                 | IPI00243602 | 33 kDa  | 10  | 10  | 7   | 9   | 4   | 2   | 10  | 8   | 3   | 0.0747 | 0.0295 | 0.4 | 0.3  |
| CLIC1 Chloride intracellular channel protein 1                | IPI00010896 | 27 kDa  | 5   | 6   | 6   | 7   | 0   | 0   | 5   | 7   | 0   | 0.0043 | 0.0122 | 0.0 | 0.0  |
| CLIC4 Chloride intracellular channel protein 4                | IPI00001960 | 29 kDa  | 5   | 7   | 16  | 12  | 0   | 0   | 6   | 14  | 0   | 0.0146 | 0.0332 | 0.0 | 0.0  |
| CLN5 ceroid-lipofuscinosis, neuronal 5                        | IPI00026050 | 46 kDa  | 8   | 16  | 5   | 9   | 4   | 6   | 12  | 7   | 5   | 0.4912 | 0.2275 | 0.7 | 0.4  |
| CLPS Colipase precursor                                       | IPI00022232 | 12 kDa  | 11  | 22  | 2   | 2   | 2   | 5   | 16  | 2   | 4   | 0.3977 | 0.1627 | 1.8 | 0.2  |
| CLSTN1 Isoform 2 of Calsyntenin-1 precursor (Fragment)        | IPI00007257 | 109 kDa | 1   | 2   | 1   | 1   | 3   | 2   | 2   | 1   | 3   | 0.1008 | 0.2505 | 2.6 | 1.7  |
| CLTC Isoform 1 of Clathrin heavy chain 1                      | IPI00024067 | 192 kDa | 5   | 12  | 1   | 4   | 1   | 2   | 8   | 3   | 2   | 0.6095 | 0.2038 | 0.6 | 0.2  |
| CLU Clusterin precursor                                       | IPI00291262 | 52 kDa  | 181 | 133 | 128 | 117 | 102 | 96  | 157 | 123 | 99  | 0.0685 | 0.1390 | 0.8 | 0.6  |
| CMBL Carboxymethylenebutenolidase homolog                     | IPI00383046 | 28 kDa  | 2   | 3   | 4   | 1   | 0   | 0   | 3   | 3   | 0   | 0.2413 | 0.0122 | 0.0 | 0.0  |
| CMPK1 cDNA, FLJ93091, Homo sapiens UMP-CMP kinase (I          | IPI00219953 | 26 kDa  | 4   | 0   | 0   | 2   | 0   | 0   | 2   | 1   | 0   | 0.4226 | 0.4226 | 0.0 | 0.0  |
| CNDP1 Beta-Ala-His dipeptidase precursor                      | IPI00064667 | 57 kDa  | 0   | 0   | 2   | 2   | 0   | 0   | 0   | 2   | 0   | 0.0001 | -      | 0.0 | -    |
| CNDP2 Cytosolic non-specific dipeptidase                      | IPI00177728 | 53 kDa  | 5   | 4   | 3   | 5   | 3   | 3   | 4   | 4   | 3   | 0.4566 | 0.1046 | 0.8 | 0.7  |
| CNP Isoform CNPI of 2',3'-cyclic-nucleotide 3'-phosphodies    | IPI00220993 | 45 kDa  | 4   | 2   | 1   | 5   | 3   | 0   | 3   | 3   | 2   | 0.6341 | 0.5951 | 0.5 | 0.6  |
| CNTR Ciliary neurotrophic factor receptor alpha precursor     | IPI00003102 | 41 kDa  | 38  | 31  | 66  | 43  | 19  | 24  | 35  | 55  | 21  | 0.0987 | 0.0925 | 0.4 | 0.6  |
| CNTN1 Isoform 1 of Contactin-1 precursor                      | IPI00029751 | 113 kDa | 84  | 106 | 67  | 79  | 63  | 72  | 95  | 73  | 67  | 0.5501 | 0.1469 | 0.9 | 0.7  |
| CNTN6 Contactin-6 precursor                                   | IPI00004433 | 114 kDa | 0   | 3   | 0   | 0   | 0   | 0   | 2   | 0   | 0   | -      | 0.4226 | -   | 0.0  |
| COCH Cochlin precursor                                        | IPI00012386 | 59 kDa  | 8   | 8   | 6   | 11  | 14  | 9   | 8   | 9   | 11  | 0.5687 | 0.3743 | 1.3 | 1.4  |
| COL12A1 Isoform 4 of Collagen alpha-1(XII) chain precursor    | IPI00302944 | 325 kDa | 22  | 23  | 5   | 12  | 9   | 12  | 22  | 9   | 10  | 0.7444 | 0.0187 | 1.2 | 0.5  |
| COL14A1 Isoform 1 of Collagen alpha-1(XIV) chain precursor    | IPI00176193 | 194 kDa | 0   | 0   | 0   | 2   | 0   | 0   | 0   | 1   | 0   | 0.4226 | -      | 0.0 | -    |
| COL15A1 Collagen alpha-1(XV) chain precursor                  | IPI00295414 | 142 kDa | 31  | 23  | 49  | 49  | 28  | 23  | 27  | 49  | 25  | 0.0108 | 0.7084 | 0.5 | 0.9  |
| COL18A1 Isoform 2 of Collagen alpha-1(XVIII) chain precursor  | IPI00022822 | 154 kDa | 48  | 48  | 28  | 26  | 13  | 18  | 48  | 27  | 16  | 0.0538 | 0.0061 | 0.6 | 0.3  |
| COL1A2 Collagen alpha-2(I) chain precursor                    | IPI00304962 | 129 kDa | 12  | 10  | 7   | 9   | 8   | 3   | 11  | 8   | 5   | 0.3553 | 0.1526 | 0.7 | 0.5  |
| COL28A1 Isoform 1 of Collagen alpha-1(XXVIII) chain precursor | IPI00657936 | 117 kDa | 14  | 6   | 4   | 4   | 2   | 0   | 10  | 4   | 1   | 0.1071 | 0.1709 | 0.3 | 0.1  |
| COL4A1 Uncharacterized protein COL4A1                         | IPI00743696 | 161 kDa | 18  | 13  | 15  | 10  | 8   | 10  | 15  | 13  | 9   | 0.2506 | 0.1260 | 0.7 | 0.6  |
| COL4A2 Collagen alpha-2(IV) chain precursor                   | IPI00306322 | 168 kDa | 56  | 60  | 39  | 34  | 23  | 41  | 58  | 37  | 32  | 0.6585 | 0.1009 | 0.9 | 0.5  |
| COL4A6 Isoform B of Collagen alpha-6(IV) chain precursor      | IPI00472200 | 164 kDa | 2   | 4   | 1   | 1   | 0   | 0   | 3   | 1   | 0   | 0.0001 | 0.0574 | 0.0 | 0.0  |
| COL5A3 Collagen alpha-3(V) chain precursor                    | IPI00018279 | 172 kDa | 1   | 4   | 2   | 4   | 3   | 2   | 3   | 3   | 3   | 0.7609 | 0.9420 | 0.9 | 1.0  |
| COL6A1 Collagen alpha-1(VI) chain precursor                   | IPI00291136 | 109 kDa | 273 | 278 | 297 | 297 | 202 | 248 | 276 | 297 | 225 | 0.0879 | 0.1581 | 0.8 | 0.8  |
| COL6A2 Isoform 2C2A of Collagen alpha-2(VI) chain precursor   | IPI00220613 | 97 kDa  | 2   | 5   | 2   | 4   | 3   | 0   | 4   | 3   | 2   | 0.5247 | 0.4325 | 0.5 | 0.4  |
| COL6A3 alpha 3 type VI collagen isoform 1 precursor           | IPI00022200 | 344 kDa | 68  | 60  | 32  | 57  | 37  | 32  | 64  | 44  | 35  | 0.5350 | 0.0269 | 0.8 | 0.5  |
| COLEC12 Isoform 1 of Collectin-12                             | IPI00414467 | 82 kDa  | 2   | 2   | 11  | 10  | 11  | 9   | 2   | 10  | 10  | 0.6335 | 0.0250 | 0.9 | 4.5  |
| COMP Cartilage oligomeric matrix protein precursor            | IPI00028030 | 83 kDa  | 6   | 16  | 7   | 8   | 6   | 4   | 11  | 8   | 5   | 0.0581 | 0.3497 | 0.6 | 0.4  |
| COPB2 Coatamer subunit beta'                                  | IPI00220219 | 102 kDa | 2   | 3   | 1   | 2   | 0   | 0   | 3   | 2   | 0   | 0.0905 | 0.0122 | 0.0 | 0.0  |
| CORO1A Coronin-1A                                             | IPI00010133 | 51 kDa  | 0   | 0   | 1   | 2   | 0   | 0   | 0   | 2   | 0   | 0.0905 | -      | 0.0 | -    |
| COTL1 Coactosin-like protein                                  | IPI00017704 | 16 kDa  | 11  | 19  | 8   | 11  | 9   | 5   | 15  | 10  | 7   | 0.3340 | 0.2213 | 0.7 | 0.5  |
| CP Ceruloplasmin precursor                                    | IPI00017601 | 122 kDa | 327 | 368 | 279 | 238 | 306 | 305 | 348 | 258 | 305 | 0.1452 | 0.1732 | 1.2 | 0.9  |
| CPA1 Carboxypeptidase A1 precursor                            | IPI00009823 | 47 kDa  | 1   | 0   | 0   | 0   | 13  | 8   | 1   | 0   | 10  | 0.0678 | 0.0784 | -   | 17.3 |
| CPD Carboxypeptidase D precursor                              | IPI00027078 | 153 kDa | 2   | 2   | 1   | 1   | 0   | 0   | 2   | 1   | 0   | 0.0001 | 0.0081 | 0.0 | 0.0  |
| CPE Carboxypeptidase E precursor                              | IPI00031121 | 64 kDa  | 19  | 22  | 7   | 20  | 19  | 13  | 21  | 14  | 16  | 0.7716 | 0.2762 | 1.2 | 0.8  |
| CPM Carboxypeptidase M precursor                              | IPI00026270 | 51 kDa  | 47  | 45  | 43  | 69  | 21  | 31  | 46  | 56  | 26  | 0.1613 | 0.0620 | 0.5 | 0.6  |
| CPN2 Carboxypeptidase N subunit 2 precursor                   | IPI00479116 | 61 kDa  | 47  | 50  | 52  | 47  | 55  | 39  | 48  | 49  | 47  | 0.8058 | 0.8698 | 1.0 | 1.0  |
| CPNE3 Copine-3                                                | IPI00024403 | 60 kDa  | 6   | 3   | 8   | 6   | 2   | 2   | 4   | 7   | 2   | 0.0447 | 0.2610 | 0.3 | 0.5  |
| CPNE8 Copine-8                                                | IPI00384746 | 63 kDa  | 4   | 2   | 0   | 2   | 0   | 1   | 3   | 1   | 1   | 0.7106 | 0.1431 | 0.5 | 0.2  |



|                                                            |             |         |      |      |      |      |     |     |      |      |     |        |        |     |     |
|------------------------------------------------------------|-------------|---------|------|------|------|------|-----|-----|------|------|-----|--------|--------|-----|-----|
| CPVL Probable serine carboxypeptidase CPVL precursor       | IPI00301395 | 54 kDa  | 25   | 27   | 16   | 19   | 4   | 6   | 26   | 17   | 5   | 0.0203 | 0.0043 | 0.3 | 0.2 |
| CPZ Isoform 2 of Carboxypeptidase Z precursor              | IPI00179185 | 73 kDa  | 4    | 4    | 2    | 1    | 3   | 2   | 4    | 2    | 3   | 0.2841 | 0.2208 | 1.7 | 0.7 |
| CR1 Complement receptor type 1 precursor                   | IPI00412546 | 273 kDa | 13   | 6    | 2    | 0    | 0   | 0   | 10   | 1    | 0   | 0.4226 | 0.1164 | 0.0 | 0.0 |
| CRABP2 Cellular retinoic acid-binding protein 2            | IPI00216088 | 16 kDa  | 2    | 3    | 2    | 3    | 1   | 0   | 3    | 3    | 1   | 0.1081 | 0.0756 | 0.2 | 0.2 |
| CRB2 Isoform 1 of Crumbs homolog 2 precursor               | IPI00410585 | 134 kDa | 16   | 15   | 13   | 10   | 6   | 10  | 15   | 12   | 8   | 0.2403 | 0.0668 | 0.7 | 0.5 |
| CRIM1 Cysteine-rich motor neuron 1 protein precursor       | IPI00009294 | 114 kDa | 6    | 10   | 3    | 7    | 3   | 8   | 8    | 5    | 5   | 0.9528 | 0.4669 | 1.0 | 0.7 |
| CRISPLD1 Cysteine-rich secretory protein LCCL domain-con   | IPI00027806 | 57 kDa  | 1    | 0    | 2    | 0    | 0   | 0   | 1    | 1    | 0   | 0.4226 | 0.4226 | 0.0 | 0.0 |
| CRISPLD2 Isoform 1 of Cysteine-rich secretory protein LCCL | IPI00027821 | 56 kDa  | 10   | 6    | 7    | 4    | 2   | 0   | 8    | 6    | 1   | 0.1410 | 0.0863 | 0.2 | 0.1 |
| CRP Isoform 1 of C-reactive protein precursor              | IPI00022389 | 25 kDa  | 6    | 8    | 0    | 2    | 1   | 0   | 7    | 1    | 1   | 0.7192 | 0.0300 | 0.5 | 0.1 |
| CRTAC1 Isoform 1 of Cartilage acidic protein 1 precursor   | IPI00451624 | 71 kDa  | 0    | 0    | 5    | 6    | 1   | 1   | 0    | 6    | 1   | 0.0095 | 0.0002 | 0.2 | -   |
| CRYAB Alpha-crystallin B chain                             | IPI00021369 | 20 kDa  | 5    | 7    | 6    | 8    | 0   | 0   | 6    | 7    | 0   | 0.0169 | 0.0332 | 0.0 | 0.0 |
| CRYL1 Lambda-crystallin homolog                            | IPI00006443 | 35 kDa  | 10   | 6    | 6    | 3    | 0   | 1   | 8    | 5    | 1   | 0.1338 | 0.0607 | 0.1 | 0.1 |
| CRYM Mu-crystallin homolog                                 | IPI00000949 | 34 kDa  | 1    | 0    | 2    | 2    | 0   | 0   | 1    | 2    | 0   | 0.0001 | 0.4226 | 0.0 | 0.0 |
| CRYZ Quinone oxidoreductase                                | IPI00000792 | 35 kDa  | 5    | 2    | 6    | 5    | 2   | 2   | 3    | 6    | 2   | 0.0259 | 0.4736 | 0.4 | 0.6 |
| CSF1 Isoform 1 of Macrophage colony-stimulating factor 1   | IPI00015881 | 60 kDa  | 34   | 37   | 33   | 35   | 58  | 71  | 35   | 34   | 65  | 0.0409 | 0.0458 | 1.9 | 1.8 |
| CSPG4 Chondroitin sulfate proteoglycan 4 precursor         | IPI00019157 | 250 kDa | 31   | 22   | 32   | 27   | 18  | 11  | 27   | 29   | 14  | 0.0690 | 0.1626 | 0.5 | 0.5 |
| CST3;CST2 Cystatin-C precursor                             | IPI00032293 | 16 kDa  | 46   | 39   | 30   | 36   | 23  | 27  | 42   | 33   | 25  | 0.1697 | 0.0444 | 0.8 | 0.6 |
| CST4 Cystatin-S precursor                                  | IPI00032294 | 16 kDa  | 4    | 4    | 7    | 6    | 12  | 8   | 4    | 7    | 10  | 0.3338 | 0.1208 | 1.4 | 2.6 |
| CST6 Cystatin-M precursor                                  | IPI00019954 | 17 kDa  | 26   | 28   | 38   | 29   | 55  | 50  | 27   | 34   | 53  | 0.0641 | 0.0089 | 1.6 | 1.9 |
| CSTA Cystatin-A                                            | IPI00032325 | 11 kDa  | 18   | 25   | 13   | 9    | 15  | 20  | 21   | 11   | 18  | 0.1499 | 0.4918 | 1.6 | 0.8 |
| CSTB Cystatin-B                                            | IPI00021828 | 11 kDa  | 6    | 7    | 4    | 3    | 1   | 0   | 6    | 4    | 1   | 0.0583 | 0.0153 | 0.1 | 0.1 |
| CTBS Di-N-acetylchitobiase precursor                       | IPI00007778 | 44 kDa  | 55   | 45   | 46   | 37   | 76  | 75  | 50   | 41   | 76  | 0.0145 | 0.0378 | 1.8 | 1.5 |
| CTGF Isoform 1 of Connective tissue growth factor precurs  | IPI00020977 | 38 kDa  | 4    | 9    | 4    | 8    | 8   | 4   | 6    | 6    | 6   | 0.9304 | 0.9336 | 1.0 | 1.0 |
| CTSA Lysosomal protective protein precursor                | IPI00021794 | 54 kDa  | 29   | 30   | 21   | 18   | 11  | 13  | 29   | 19   | 12  | 0.0664 | 0.0041 | 0.6 | 0.4 |
| CTSB Cathepsin B precursor                                 | IPI00295741 | 38 kDa  | 53   | 39   | 28   | 34   | 42  | 48  | 46   | 31   | 45  | 0.0922 | 0.9241 | 1.5 | 1.0 |
| CTSC Dipeptidyl-peptidase 1 precursor                      | IPI00022810 | 52 kDa  | 36   | 40   | 22   | 25   | 17  | 15  | 38   | 24   | 16  | 0.0352 | 0.0092 | 0.7 | 0.4 |
| CTSD Cathepsin D precursor                                 | IPI00011229 | 45 kDa  | 70   | 75   | 48   | 46   | 57  | 57  | 72   | 47   | 57  | 0.0102 | 0.0308 | 1.2 | 0.8 |
| CTSH Cathepsin H precursor                                 | IPI00297487 | 37 kDa  | 20   | 30   | 13   | 13   | 14  | 14  | 25   | 13   | 14  | 0.1274 | 0.1483 | 1.1 | 0.6 |
| CTSL1 Cathepsin L1 precursor                               | IPI00012887 | 38 kDa  | 10   | 13   | 10   | 8    | 18  | 17  | 11   | 9    | 17  | 0.0060 | 0.0711 | 2.0 | 1.5 |
| CTSS Cathepsin S precursor                                 | IPI00299150 | 37 kDa  | 5    | 3    | 4    | 2    | 2   | 2   | 4    | 3    | 2   | 0.4612 | 0.1950 | 0.7 | 0.6 |
| CTSZ Cathepsin Z precursor                                 | IPI00002745 | 34 kDa  | 11   | 14   | 14   | 5    | 26  | 18  | 12   | 9    | 22  | 0.1621 | 0.1516 | 2.4 | 1.8 |
| CTTN Src substrate cortactin                               | IPI00029601 | 62 kDa  | 0    | 1    | 2    | 2    | 2   | 2   | 1    | 2    | 2   | 0.1562 | 0.0790 | 1.0 | 4.3 |
| CUBN Cubilin precursor                                     | IPI00160130 | 399 kDa | 1209 | 1201 | 1164 | 1210 | 760 | 881 | 1205 | 1187 | 821 | 0.0299 | 0.0240 | 0.7 | 0.7 |
| CUTA Isoform A of Protein CutA precursor                   | IPI00034319 | 21 kDa  | 2    | 6    | 0    | 3    | 2   | 0   | 4    | 2    | 1   | 0.8342 | 0.2798 | 0.7 | 0.3 |
| CXCL12 chemokine (C-X-C motif) ligand 12 (stromal cell-de  | IPI00413781 | 14 kDa  | 7    | 6    | 7    | 2    | 6   | 4   | 7    | 5    | 5   | 0.9597 | 0.1833 | 1.0 | 0.7 |
| CYCS Cytochrome c                                          | IPI00465315 | 12 kDa  | 5    | 7    | 8    | 5    | 2   | 2   | 6    | 7    | 2   | 0.1060 | 0.0776 | 0.3 | 0.4 |
| CYFIP1 Isoform 1 of Cytoplasmic FMR1-interacting protein   | IPI00644231 | 145 kDa | 5    | 3    | 0    | 3    | 8   | 11  | 4    | 2    | 9   | 0.0717 | 0.0944 | 5.9 | 2.4 |
| DAG1 Dystroglycan precursor                                | IPI00028911 | 98 kDa  | 38   | 31   | 41   | 33   | 10  | 3   | 35   | 37   | 7   | 0.0284 | 0.0299 | 0.2 | 0.2 |
| DAK Dihydroxyacetone kinase                                | IPI00551024 | 59 kDa  | 5    | 2    | 1    | 3    | 0   | 0   | 3    | 2    | 0   | 0.1789 | 0.1357 | 0.0 | 0.0 |
| DBI Isoform a 1 of Acyl-CoA-binding protein                | IPI00010182 | 10 kDa  | 11   | 6    | 5    | 3    | 7   | 4   | 8    | 4    | 5   | 0.5150 | 0.3831 | 1.3 | 0.6 |
| DCD Dermcidin precursor                                    | IPI00027547 | 11 kDa  | 1    | 6    | 6    | 5    | 6   | 1   | 4    | 6    | 3   | 0.3925 | 0.9326 | 0.6 | 0.9 |
| DCHS1 Protocadherin-16 precursor                           | IPI00064262 | 346 kDa | 38   | 30   | 22   | 20   | 3   | 5   | 34   | 21   | 4   | 0.0097 | 0.0202 | 0.2 | 0.1 |
| DCXR L-xylulose reductase                                  | IPI00448095 | 26 kDa  | 5    | 4    | 4    | 2    | 0   | 0   | 4    | 3    | 0   | 0.1004 | 0.0081 | 0.0 | 0.0 |
| DDAH1 N(G),N(G)-dimethylarginine dimethylaminohydrola      | IPI00220342 | 31 kDa  | 2    | 1    | 0    | 0    | 2   | 1   | 2    | 0    | 2   | 0.1009 | 0.9513 | -   | 1.0 |
| DDAH2 N(G),N(G)-dimethylarginine dimethylaminohydrola      | IPI00000760 | 30 kDa  | 4    | 8    | 14   | 13   | 6   | 6   | 6    | 14   | 6   | 0.0042 | 0.9458 | 0.4 | 1.0 |
| DDC Aromatic-L-amino-acid decarboxylase                    | IPI00025394 | 54 kDa  | 16   | 11   | 7    | 6    | 1   | 2   | 13   | 7    | 2   | 0.0228 | 0.0383 | 0.2 | 0.1 |
| DDR1 Isoform 1 of Epithelial discoidin domain-containing r | IPI00001477 | 101 kDa | 1    | 5    | 4    | 7    | 1   | 0   | 3    | 6    | 1   | 0.0836 | 0.3265 | 0.1 | 0.2 |

|                                                               |             |         |     |     |     |     |     |     |     |     |     |        |        |     |     |
|---------------------------------------------------------------|-------------|---------|-----|-----|-----|-----|-----|-----|-----|-----|-----|--------|--------|-----|-----|
| DDR2 Discoidin domain-containing receptor 2 precursor         | IPI00004409 | 97 kDa  | 0   | 2   | 4   | 3   | 0   | 0   | 1   | 4   | 0   | 0.0229 | 0.4226 | 0.0 | 0.0 |
| DDT D-dopachrome decarboxylase                                | IPI00293867 | 13 kDa  | 8   | 4   | 2   | 8   | 3   | 1   | 6   | 5   | 2   | 0.4550 | 0.2451 | 0.4 | 0.4 |
| DEFA1;LOC728358 Neutrophil defensin 1 precursor               | IPI00005721 | 10 kDa  | 16  | 8   | 104 | 60  | 8   | 25  | 12  | 82  | 16  | 0.1073 | 0.6826 | 0.2 | 1.4 |
| DEFB1 Beta-defensin 1 precursor                               | IPI00022290 | 7 kDa   | 11  | 13  | 7   | 6   | 7   | 12  | 12  | 7   | 9   | 0.4650 | 0.4418 | 1.4 | 0.8 |
| DKFzP686O24166 hypothetical protein LOC374383                 | IPI00398918 | 70 kDa  | 2   | 4   | 1   | 2   | 4   | 1   | 3   | 2   | 3   | 0.5696 | 0.8259 | 1.7 | 0.9 |
| DLK1 Isoform Long of Delta-like protein precursor             | IPI00160384 | 41 kDa  | 22  | 12  | 22  | 23  | 21  | 24  | 17  | 23  | 22  | 0.8750 | 0.3865 | 1.0 | 1.3 |
| DLK2 Isoform 1 of Delta-like protein 2 precursor              | IPI00028381 | 41 kDa  | 4   | 3   | 3   | 3   | 4   | 5   | 3   | 3   | 5   | 0.0693 | 0.1079 | 1.6 | 1.5 |
| DLST Full-length cDNA 5-PRIME end of clone CS0DJ009YL1        | IPI00384016 | 30 kDa  | 2   | 2   | 2   | 4   | 1   | 0   | 2   | 3   | 1   | 0.1544 | 0.1062 | 0.2 | 0.3 |
| DMBT1 Isoform 1 of Deleted in malignant brain tumors 1 p      | IPI00099110 | 261 kDa | 1   | 2   | 35  | 27  | 2   | 4   | 2   | 31  | 3   | 0.0217 | 0.2793 | 0.1 | 2.0 |
| DNASE1 Deoxyribonuclease-1 precursor                          | IPI00031065 | 31 kDa  | 46  | 24  | 46  | 43  | 32  | 32  | 35  | 45  | 32  | 0.0069 | 0.8241 | 0.7 | 0.9 |
| DNASE1L1 Deoxyribonuclease I-like 1 precursor                 | IPI00026125 | 34 kDa  | 0   | 2   | 1   | 0   | 1   | 0   | 1   | 1   | 1   | 0.9809 | 0.7315 | 1.0 | 0.6 |
| DNASE2 Deoxyribonuclease-2-alpha precursor                    | IPI00010348 | 40 kDa  | 7   | 8   | 4   | 4   | 2   | 0   | 8   | 4   | 1   | 0.1071 | 0.0310 | 0.3 | 0.1 |
| DNER Delta and Notch-like epidermal growth factor-relate      | IPI00333140 | 78 kDa  | 10  | 7   | 8   | 6   | 11  | 10  | 8   | 7   | 10  | 0.1506 | 0.2976 | 1.4 | 1.2 |
| DPEP1 Dipeptidase 1 precursor                                 | IPI00059476 | 46 kDa  | 24  | 32  | 13  | 21  | 24  | 20  | 28  | 17  | 22  | 0.3339 | 0.3286 | 1.3 | 0.8 |
| DPP4 Dipeptidyl peptidase 4                                   | IPI00018953 | 88 kDa  | 137 | 156 | 138 | 155 | 105 | 116 | 146 | 146 | 110 | 0.0746 | 0.0845 | 0.8 | 0.8 |
| DPP7 Dipeptidyl-peptidase 2 precursor                         | IPI00296141 | 54 kDa  | 52  | 56  | 16  | 17  | 13  | 9   | 54  | 16  | 11  | 0.1497 | 0.0055 | 0.7 | 0.2 |
| DPT Dermatopontin precursor                                   | IPI00292130 | 24 kDa  | 28  | 23  | 21  | 28  | 26  | 18  | 25  | 25  | 22  | 0.7140 | 0.5915 | 0.9 | 0.9 |
| DSC1 desmocollin 1 isoform Dsc1b preproprotein                | IPI00007425 | 94 kDa  | 1   | 2   | 3   | 2   | 2   | 0   | 2   | 3   | 1   | 0.3416 | 0.7114 | 0.4 | 0.7 |
| DSC2 Isoform 2A of Desmocollin-2 precursor                    | IPI00025846 | 100 kDa | 42  | 47  | 33  | 33  | 55  | 53  | 44  | 33  | 54  | 0.0034 | 0.0791 | 1.6 | 1.2 |
| DSC3 Isoform 3A of Desmocollin-3 precursor                    | IPI00031549 | 100 kDa | 1   | 0   | 2   | 2   | 0   | 0   | 1   | 2   | 0   | 0.0001 | 0.4226 | 0.0 | 0.0 |
| DSG1 Desmoglein-1 precursor                                   | IPI00025753 | 114 kDa | 7   | 14  | 17  | 8   | 6   | 4   | 11  | 13  | 5   | 0.2197 | 0.2409 | 0.4 | 0.5 |
| DSG2 Desmoglein-2 precursor                                   | IPI00028931 | 122 kDa | 2   | 4   | 2   | 1   | 2   | 2   | 3   | 2   | 2   | 0.3854 | 0.3292 | 1.4 | 0.7 |
| DSG4 Isoform 2 of Desmoglein-4 precursor                      | IPI00428691 | 115 kDa | 0   | 0   | 0   | 0   | 0   | 5   | 0   | 0   | 3   | 0.4226 | 0.4226 | -   | -   |
| DSP Isoform DPI of Desmoplakin                                | IPI00013933 | 332 kDa | 30  | 19  | 34  | 8   | 22  | 45  | 24  | 21  | 34  | 0.5448 | 0.5519 | 1.6 | 1.4 |
| DSTN Destrin                                                  | IPI00473014 | 19 kDa  | 4   | 4   | 0   | 3   | 0   | 0   | 4   | 2   | 0   | 0.4226 | 0.0028 | 0.0 | 0.0 |
| DYNC1H1 Cytoplasmic dynein 1 heavy chain 1                    | IPI00456969 | 532 kDa | 0   | 3   | 0   | 0   | 0   | 0   | 2   | 0   | 0   | -      | 0.4226 | -   | 0.0 |
| DYNLL1 Dynein light chain 1, cytoplasmic                      | IPI00019329 | 10 kDa  | 0   | 0   | 2   | 1   | 0   | 0   | 0   | 2   | 0   | 0.1004 | -      | 0.0 | -   |
| EEF1A1 Elongation factor 1-alpha 1                            | IPI00396485 | 50 kDa  | 12  | 15  | 8   | 8   | 7   | 3   | 13  | 8   | 5   | 0.1773 | 0.0630 | 0.6 | 0.4 |
| EEF2 Elongation factor 2                                      | IPI00186290 | 95 kDa  | 2   | 1   | 0   | 0   | 0   | 0   | 2   | 0   | 0   | -      | 0.1357 | -   | 0.0 |
| EFEMP1 Isoform 1 of EGF-containing fibulin-like extracellul   | IPI00029658 | 55 kDa  | 133 | 125 | 154 | 147 | 166 | 179 | 129 | 150 | 173 | 0.0923 | 0.0298 | 1.1 | 1.3 |
| EFEMP2 EGF-containing fibulin-like extracellular matrix prc   | IPI00296058 | 49 kDa  | 18  | 13  | 19  | 14  | 11  | 10  | 15  | 17  | 10  | 0.1136 | 0.1836 | 0.6 | 0.7 |
| EFNA1 Isoform 1 of Ephrin-A1 precursor                        | IPI00025840 | 24 kDa  | 2   | 4   | 2   | 9   | 1   | 2   | 3   | 6   | 2   | 0.3773 | 0.2414 | 0.3 | 0.5 |
| EFNB1 Ephrin-B1 precursor                                     | IPI00024307 | 38 kDa  | 14  | 8   | 13  | 11  | 17  | 16  | 11  | 12  | 16  | 0.0253 | 0.2514 | 1.4 | 1.5 |
| EGF Pro-epidermal growth factor precursor                     | IPI00000073 | 134 kDa | 532 | 547 | 496 | 562 | 371 | 392 | 540 | 529 | 381 | 0.0517 | 0.0065 | 0.7 | 0.7 |
| EHD4 EH domain-containing protein 4                           | IPI00005578 | 61 kDa  | 5   | 1   | 2   | 1   | 1   | 0   | 3   | 2   | 1   | 0.3149 | 0.3568 | 0.3 | 0.2 |
| EIF5A Isoform 2 of Eukaryotic translation initiation factor 5 | IPI00376005 | 20 kDa  | 2   | 2   | 0   | 2   | 1   | 0   | 2   | 1   | 1   | 0.7192 | 0.1062 | 0.5 | 0.3 |
| EIF6 Eukaryotic translation initiation factor 6               | IPI00010105 | 27 kDa  | 11  | 8   | 6   | 11  | 9   | 4   | 9   | 9   | 7   | 0.5628 | 0.3952 | 0.7 | 0.7 |
| ELA2 Leukocyte elastase precursor                             | IPI00027769 | 29 kDa  | 0   | 0   | 37  | 39  | 2   | 5   | 0   | 38  | 4   | 0.0032 | 0.1394 | 0.1 | -   |
| ELFN1 extracellular leucine-rich repeat and fibronectin typ   | IPI00248596 | 88 kDa  | 2   | 2   | 3   | 4   | 1   | 1   | 2   | 4   | 1   | 0.0334 | 0.0307 | 0.3 | 0.5 |
| ENDOD1 Endonuclease domain-containing 1 protein precu         | IPI00001952 | 55 kDa  | 30  | 16  | 50  | 30  | 28  | 30  | 23  | 40  | 29  | 0.3804 | 0.5003 | 0.7 | 1.3 |
| ENG Isoform Long of Endoglin precursor                        | IPI00017567 | 71 kDa  | 5   | 10  | 7   | 4   | 4   | 2   | 7   | 6   | 3   | 0.3348 | 0.2831 | 0.6 | 0.4 |
| ENO1 Isoform alpha-enolase of Alpha-enolase                   | IPI00465248 | 47 kDa  | 54  | 42  | 41  | 37  | 15  | 23  | 48  | 39  | 19  | 0.0384 | 0.0531 | 0.5 | 0.4 |
| ENPEP Glutamyl aminopeptidase                                 | IPI00014375 | 109 kDa | 140 | 146 | 89  | 104 | 99  | 105 | 143 | 96  | 102 | 0.5354 | 0.0104 | 1.1 | 0.7 |
| ENPP2 Isoform 1 of Ectonucleotide pyrophosphatase/phos        | IPI00156171 | 99 kDa  | 5   | 8   | 4   | 7   | 0   | 1   | 6   | 6   | 1   | 0.0828 | 0.0740 | 0.1 | 0.1 |
| EPDR1 Isoform 1 of Mammalian ependymin-related protei         | IPI00259102 | 25 kDa  | 0   | 2   | 0   | 0   | 1   | 0   | 1   | 0   | 1   | 0.4226 | 0.7315 | -   | 0.6 |
| EPHA1 Ephrin type-A receptor 1 precursor                      | IPI00294250 | 108 kDa | 4   | 6   | 3   | 3   | 3   | 4   | 5   | 3   | 4   | 0.3183 | 0.5218 | 1.2 | 0.8 |
| EPHA7 Isoform 1 of Ephrin type-A receptor 7 precursor         | IPI00016645 | 112 kDa | 2   | 4   | 3   | 7   | 6   | 2   | 3   | 5   | 4   | 0.6513 | 0.7686 | 0.7 | 1.2 |



|                                                            |             |         |     |     |     |     |    |     |     |     |     |        |        |     |     |
|------------------------------------------------------------|-------------|---------|-----|-----|-----|-----|----|-----|-----|-----|-----|--------|--------|-----|-----|
| EPHB2 Isoform 1 of Ephrin type-B receptor 2 precursor      | IPI00021275 | 117 kDa | 11  | 14  | 4   | 6   | 9  | 6   | 12  | 5   | 8   | 0.2597 | 0.1388 | 1.5 | 0.6 |
| EPHB3 Ephrin type-B receptor 3 precursor                   | IPI00289329 | 110 kDa | 7   | 2   | 10  | 8   | 1  | 1   | 5   | 9   | 1   | 0.0063 | 0.3091 | 0.1 | 0.2 |
| EPHB4 Ephrin receptor                                      | IPI00186826 | 103 kDa | 20  | 23  | 47  | 37  | 12 | 16  | 22  | 42  | 14  | 0.0317 | 0.0865 | 0.3 | 0.7 |
| EPHB6 Ephrin type-B receptor 6 precursor                   | IPI00005222 | 109 kDa | 7   | 11  | 14  | 22  | 4  | 5   | 9   | 18  | 5   | 0.0851 | 0.1651 | 0.3 | 0.5 |
| EPS8 Epidermal growth factor receptor kinase substrate 8   | IPI00290337 | 92 kDa  | 6   | 6   | 12  | 14  | 25 | 31  | 6   | 13  | 28  | 0.0429 | 0.0167 | 2.2 | 4.7 |
| EPS8L1 Isoform 1 of Epidermal growth factor receptor kina  | IPI00301250 | 80 kDa  | 0   | 0   | 1   | 0   | 2  | 1   | 0   | 1   | 2   | 0.2884 | 0.1009 | 3.1 | -   |
| EPS8L2 Isoform 1 of Epidermal growth factor receptor kina  | IPI00414315 | 81 kDa  | 7   | 11  | 8   | 3   | 23 | 14  | 9   | 6   | 19  | 0.1382 | 0.1973 | 3.2 | 2.0 |
| ERAP1 Isoform 2 of Endoplasmic reticulum aminopeptidase    | IPI00165949 | 108 kDa | 4   | 4   | 2   | 4   | 0  | 2   | 4   | 3   | 1   | 0.2980 | 0.1300 | 0.3 | 0.3 |
| ESAM Endothelial cell-selective adhesion molecule precurs  | IPI00303161 | 41 kDa  | 8   | 5   | 17  | 14  | 22 | 23  | 7   | 16  | 22  | 0.0347 | 0.0119 | 1.4 | 3.3 |
| EVPL Envoplakin                                            | IPI00023711 | 232 kDa | 0   | 0   | 0   | 0   | 10 | 18  | 0   | 0   | 14  | 0.0778 | 0.0778 | -   | -   |
| EZR Ezrin                                                  | IPI00746388 | 69 kDa  | 59  | 60  | 78  | 60  | 79 | 68  | 59  | 69  | 73  | 0.7345 | 0.1375 | 1.1 | 1.2 |
| F11 Isoform 1 of Coagulation factor XI precursor           | IPI00008556 | 70 kDa  | 2   | 2   | 6   | 6   | 0  | 0   | 2   | 6   | 0   | 0.0001 | 0.0081 | 0.0 | 0.0 |
| F11R Junctional adhesion molecule A precursor              | IPI00001754 | 33 kDa  | 13  | 12  | 4   | 10  | 13 | 8   | 13  | 7   | 10  | 0.5395 | 0.5222 | 1.4 | 0.8 |
| F13B Coagulation factor XIII B chain precursor             | IPI00007240 | 76 kDa  | 2   | 1   | 2   | 0   | 0  | 0   | 2   | 1   | 0   | 0.4226 | 0.1357 | 0.0 | 0.0 |
| F2 Prothrombin precursor (Fragment)                        | IPI00019568 | 70 kDa  | 83  | 130 | 106 | 62  | 99 | 127 | 106 | 84  | 113 | 0.3812 | 0.8348 | 1.3 | 1.1 |
| FABP1 FABP1 protein (Fragment)                             | IPI00010290 | 15 kDa  | 5   | 7   | 2   | 6   | 13 | 8   | 6   | 4   | 10  | 0.2192 | 0.2812 | 2.5 | 1.8 |
| FABP2 Fatty acid-binding protein, intestinal               | IPI00218477 | 15 kDa  | 0   | 1   | 1   | 1   | 2  | 1   | 1   | 1   | 2   | 0.4051 | 0.2703 | 1.6 | 3.3 |
| FABP3 Fatty acid-binding protein, heart                    | IPI00219684 | 15 kDa  | 17  | 15  | 12  | 14  | 20 | 11  | 16  | 13  | 15  | 0.6891 | 0.9052 | 1.2 | 1.0 |
| FABP5;FABP5L7 Fatty acid-binding protein, epidermal        | IPI00007797 | 15 kDa  | 13  | 14  | 11  | 10  | 1  | 1   | 14  | 10  | 1   | 0.0002 | 0.0011 | 0.1 | 0.1 |
| FABP7 Putative uncharacterized protein DKFZp547J2313       | IPI00027429 | 19 kDa  | 0   | 0   | 0   | 0   | 3  | 2   | 0   | 0   | 3   | 0.0421 | 0.0421 | -   | -   |
| FAH Fumarylacetoacetase                                    | IPI00031708 | 46 kDa  | 8   | 4   | 3   | 8   | 4  | 1   | 6   | 6   | 3   | 0.4296 | 0.3361 | 0.5 | 0.4 |
| FAM151A Isoform 1 of Protein FAM151A                       | IPI00300865 | 64 kDa  | 6   | 5   | 3   | 3   | 0  | 1   | 5   | 3   | 1   | 0.0401 | 0.0211 | 0.2 | 0.1 |
| FAM171A1 UPF0560 protein C10orf38 precursor                | IPI00000265 | 98 kDa  | 2   | 2   | 4   | 3   | 0  | 0   | 2   | 4   | 0   | 0.0229 | 0.0081 | 0.0 | 0.0 |
| FAM3C Protein FAM3C precursor                              | IPI00334282 | 25 kDa  | 23  | 22  | 16  | 14  | 21 | 12  | 22  | 15  | 16  | 0.8234 | 0.3172 | 1.1 | 0.7 |
| FASN Fatty acid synthase                                   | IPI00026781 | 273 kDa | 2   | 6   | 1   | 0   | 0  | 0   | 4   | 1   | 0   | 0.4226 | 0.1450 | 0.0 | 0.0 |
| FAT2 Protocadherin Fat 2 precursor                         | IPI00302641 | 479 kDa | 4   | 7   | 0   | 0   | 0  | 0   | 5   | 0   | 0   | -      | 0.0895 | -   | 0.0 |
| FAT4 Isoform 1 of Protocadherin Fat 4 precursor            | IPI00852735 | 543 kDa | 134 | 170 | 77  | 85  | 6  | 12  | 152 | 81  | 9   | 0.0046 | 0.0156 | 0.1 | 0.1 |
| FBLN1 Isoform C of Fibulin-1 precursor                     | IPI00296537 | 74 kDa  | 35  | 43  | 40  | 45  | 17 | 23  | 39  | 42  | 20  | 0.0252 | 0.0630 | 0.5 | 0.5 |
| FBLN2 fibulin 2 precursor, isoform a                       | IPI00465038 | 132 kDa | 49  | 29  | 67  | 69  | 75 | 77  | 39  | 68  | 76  | 0.0475 | 0.0678 | 1.1 | 1.9 |
| FBLN5 Fibulin-5 precursor                                  | IPI00294615 | 50 kDa  | 28  | 22  | 23  | 18  | 35 | 26  | 25  | 20  | 30  | 0.2104 | 0.4079 | 1.5 | 1.2 |
| FBLN7 Isoform 1 of Fibulin-7 precursor                     | IPI00167710 | 47 kDa  | 7   | 3   | 6   | 5   | 7  | 6   | 5   | 6   | 7   | 0.3310 | 0.5673 | 1.1 | 1.3 |
| FBN1 Fibrillin-1 precursor                                 | IPI00328113 | 312 kDa | 92  | 112 | 93  | 85  | 97 | 103 | 102 | 89  | 100 | 0.1704 | 0.8496 | 1.1 | 1.0 |
| FBP1 Fructose-1,6-bisphosphatase 1                         | IPI00073772 | 37 kDa  | 24  | 11  | 26  | 19  | 8  | 9   | 17  | 23  | 8   | 0.0674 | 0.2874 | 0.4 | 0.5 |
| FCER2 Isoform A of Low affinity immunoglobulin epsilon Fc  | IPI00027491 | 36 kDa  | 14  | 3   | 13  | 11  | 37 | 27  | 9   | 12  | 32  | 0.0638 | 0.0946 | 2.7 | 3.7 |
| FCGBP IgGfC-binding protein precursor                      | IPI00242956 | 572 kDa | 25  | 25  | 268 | 312 | 19 | 14  | 25  | 290 | 16  | 0.0064 | 0.0664 | 0.1 | 0.7 |
| FCGR3A Low affinity immunoglobulin gamma Fc region rec     | IPI00218834 | 29 kDa  | 67  | 69  | 55  | 48  | 63 | 61  | 68  | 51  | 62  | 0.1079 | 0.0365 | 1.2 | 0.9 |
| FCGR3B Fc-gamma receptor IIIb                              | IPI00023858 | 30 kDa  | 34  | 38  | 31  | 29  | 26 | 31  | 36  | 30  | 29  | 0.7093 | 0.1625 | 1.0 | 0.8 |
| FCN2 Isoform 1 of Ficolin-2 precursor                      | IPI00017530 | 34 kDa  | 6   | 3   | 6   | 5   | 4  | 2   | 4   | 6   | 3   | 0.1892 | 0.5809 | 0.6 | 0.7 |
| FDX1 Adrenodoxin, mitochondrial precursor                  | IPI00019326 | 19 kDa  | 1   | 3   | 2   | 1   | 3  | 2   | 2   | 2   | 3   | 0.2841 | 0.6184 | 1.7 | 1.3 |
| FER1L3 Isoform 1 of Myoferlin                              | IPI00021048 | 235 kDa | 2   | 4   | 0   | 1   | 0  | 1   | 3   | 1   | 1   | 0.9819 | 0.1100 | 1.0 | 0.2 |
| FGA Isoform 1 of Fibrinogen alpha chain precursor          | IPI00021885 | 95 kDa  | 53  | 59  | 46  | 41  | 40 | 46  | 56  | 43  | 43  | 0.8931 | 0.1029 | 1.0 | 0.8 |
| FGB Fibrinogen beta chain precursor                        | IPI00298497 | 56 kDa  | 8   | 5   | 2   | 3   | 0  | 0   | 7   | 3   | 0   | 0.0340 | 0.0586 | 0.0 | 0.0 |
| FGFR1 Isoform 1 of Basic fibroblast growth factor receptor | IPI00005142 | 92 kDa  | 1   | 0   | 1   | 0   | 2  | 0   | 1   | 1   | 1   | 0.6862 | 0.7280 | 2.1 | 1.8 |
| FGFR2 Isoform 1 of Fibroblast growth factor receptor 2 pre | IPI00010680 | 92 kDa  | 1   | 4   | 1   | 2   | 1  | 3   | 3   | 2   | 2   | 0.6625 | 0.8259 | 1.4 | 0.8 |
| FGG Isoform Gamma-B of Fibrinogen gamma chain precurs      | IPI00021891 | 52 kDa  | 19  | 16  | 2   | 8   | 0  | 2   | 18  | 5   | 1   | 0.3335 | 0.0132 | 0.2 | 0.1 |
| FLG Filaggrin                                              | IPI00026256 | 435 kDa | 2   | 1   | 62  | 60  | 0  | 0   | 2   | 61  | 0   | 0.0004 | 0.1357 | 0.0 | 0.0 |
| FLG2 Filaggrin-2                                           | IPI00397801 | 248 kDa | 4   | 5   | 7   | 3   | 1  | 2   | 4   | 5   | 2   | 0.2426 | 0.0925 | 0.3 | 0.4 |

|                                                            |             |         |     |     |     |     |     |     |     |     |     |        |        |     |     |
|------------------------------------------------------------|-------------|---------|-----|-----|-----|-----|-----|-----|-----|-----|-----|--------|--------|-----|-----|
| FLJ11151 Isoform 1 of Uncharacterized metallophosphoest    | IPI00305010 | 36 kDa  | 0   | 0   | 2   | 0   | 0   | 0   | 0   | 1   | 0   | 0.4226 | -      | 0.0 | -   |
| FLJ22222 Isoform 1 of PKHD domain-containing transmembr    | IPI0002884  | 36 kDa  | 0   | 0   | 5   | 2   | 0   | 0   | 0   | 4   | 0   | 0.1497 | -      | 0.0 | -   |
| FLNA filamin A, alpha isoform 1                            | IPI00302592 | 280 kDa | 20  | 10  | 4   | 7   | 7   | 3   | 15  | 6   | 5   | 0.7489 | 0.2004 | 0.9 | 0.3 |
| FLNB Isoform 1 of Filamin-B                                | IPI00289334 | 278 kDa | 5   | 14  | 1   | 5   | 8   | 6   | 9   | 3   | 7   | 0.2077 | 0.6662 | 2.3 | 0.8 |
| FLNC Isoform 1 of Filamin-C                                | IPI00178352 | 291 kDa | 10  | 13  | 4   | 9   | 17  | 13  | 11  | 7   | 15  | 0.1265 | 0.3052 | 2.2 | 1.3 |
| FLOT1 Flotillin-1                                          | IPI00027438 | 47 kDa  | 2   | 8   | 0   | 3   | 0   | 0   | 5   | 2   | 0   | 0.4226 | 0.2046 | 0.0 | 0.0 |
| FLOT2 flotillin 2                                          | IPI00789008 | 47 kDa  | 0   | 1   | 0   | 2   | 0   | 0   | 1   | 1   | 0   | 0.4226 | 0.4226 | 0.0 | 0.0 |
| FN1 fibronectin 1 isoform 4 preproprotein                  | IPI00414283 | 257 kDa | 199 | 238 | 253 | 291 | 240 | 244 | 219 | 272 | 242 | 0.2527 | 0.3568 | 0.9 | 1.1 |
| FOLH1 Isoform PSMA-1 of Glutamate carboxypeptidase 2       | IPI00028514 | 84 kDa  | 6   | 7   | 0   | 2   | 0   | 0   | 6   | 1   | 0   | 0.4226 | 0.0059 | 0.0 | 0.0 |
| FOLR1 Folate receptor alpha precursor                      | IPI00441498 | 30 kDa  | 65  | 44  | 31  | 40  | 36  | 30  | 54  | 36  | 33  | 0.7216 | 0.1896 | 0.9 | 0.6 |
| FREM1 Isoform 1 of FRAS1-related extracellular matrix pro  | IPI00477820 | 244 kDa | 4   | 3   | 0   | 0   | 0   | 0   | 3   | 0   | 0   | -      | 0.0081 | -   | 0.0 |
| FREM2 Isoform 1 of FRAS1-related extracellular matrix pro  | IPI00180707 | 351 kDa | 135 | 159 | 130 | 134 | 21  | 29  | 147 | 132 | 25  | 0.0017 | 0.0102 | 0.2 | 0.2 |
| FRK Tyrosine-protein kinase FRK                            | IPI00000885 | 58 kDa  | 0   | 0   | 1   | 0   | 0   | 5   | 0   | 1   | 3   | 0.5135 | 0.4226 | 5.1 | -   |
| FSTL1 Follistatin-related protein 1 precursor              | IPI00029723 | 35 kDa  | 16  | 12  | 13  | 8   | 9   | 3   | 14  | 10  | 6   | 0.3351 | 0.1436 | 0.6 | 0.4 |
| FTH1 Ferritin heavy chain                                  | IPI00554521 | 21 kDa  | 13  | 17  | 22  | 17  | 17  | 28  | 15  | 19  | 22  | 0.7026 | 0.3584 | 1.1 | 1.5 |
| FTL Ferritin light chain                                   | IPI00738499 | 20 kDa  | 25  | 21  | 28  | 26  | 32  | 57  | 23  | 27  | 44  | 0.2931 | 0.2345 | 1.7 | 1.9 |
| FUCA1 Tissue alpha-L-fucosidase precursor                  | IPI00843910 | 54 kDa  | 4   | 4   | 2   | 1   | 2   | 0   | 4   | 2   | 1   | 0.7351 | 0.1373 | 0.7 | 0.3 |
| FURIN Furin precursor                                      | IPI00018387 | 87 kDa  | 2   | 1   | 3   | 0   | 0   | 0   | 2   | 2   | 0   | 0.4226 | 0.1357 | 0.0 | 0.0 |
| FZD2 Frizzled-2 precursor                                  | IPI00016027 | 64 kDa  | 2   | 3   | 2   | 3   | 3   | 5   | 3   | 3   | 4   | 0.2715 | 0.2680 | 1.7 | 1.6 |
| FZD4 Frizzled-4 precursor                                  | IPI00297420 | 60 kDa  | 1   | 4   | 2   | 6   | 2   | 2   | 3   | 4   | 2   | 0.4333 | 0.7899 | 0.5 | 0.8 |
| GAA acid alpha-glucosidase preproprotein                   | IPI00883772 | 105 kDa | 330 | 370 | 262 | 321 | 187 | 180 | 350 | 291 | 184 | 0.0692 | 0.0148 | 0.6 | 0.5 |
| GAA Lysosomal alpha-glucosidase precursor                  | IPI00293088 | 105 kDa | 372 | 402 | 290 | 336 | 184 | 175 | 387 | 313 | 179 | 0.0296 | 0.0057 | 0.6 | 0.5 |
| GALM Aldose 1-epimerase                                    | IPI00060200 | 38 kDa  | 4   | 3   | 2   | 5   | 0   | 0   | 3   | 4   | 0   | 0.1399 | 0.0081 | 0.0 | 0.0 |
| GALNS N-acetylgalactosamine-6-sulfatase precursor          | IPI00029605 | 58 kDa  | 14  | 8   | 8   | 12  | 3   | 2   | 11  | 10  | 3   | 0.0643 | 0.1208 | 0.3 | 0.2 |
| GALNTL4 Isoform 1 of Putative polypeptide N-acetylgalact   | IPI00168626 | 70 kDa  | 8   | 4   | 2   | 1   | 0   | 0   | 6   | 2   | 0   | 0.1004 | 0.1060 | 0.0 | 0.0 |
| GANAB Isoform 1 of Neutral alpha-glucosidase AB precurs    | IPI00383581 | 107 kDa | 2   | 6   | 2   | 3   | 0   | 0   | 4   | 3   | 0   | 0.0340 | 0.1450 | 0.0 | 0.0 |
| GAPDH Glyceraldehyde-3-phosphate dehydrogenase             | IPI00219018 | 36 kDa  | 48  | 31  | 37  | 33  | 23  | 18  | 39  | 35  | 21  | 0.0439 | 0.1667 | 0.6 | 0.5 |
| GAS6 Isoform 2 of Growth arrest-specific protein 6 precurs | IPI00032532 | 75 kDa  | 6   | 9   | 3   | 2   | 0   | 0   | 7   | 3   | 0   | 0.0417 | 0.0379 | 0.0 | 0.0 |
| GATM Isoform Mitochondrial of Glycine amidinotransferas    | IPI00032103 | 48 kDa  | 6   | 6   | 0   | 0   | 0   | 0   | 6   | 0   | 0   | -      | 0.0000 | -   | 0.0 |
| GBA Isoform Long of Glucosylceramidase precursor           | IPI00021807 | 60 kDa  | 1   | 2   | 4   | 2   | 0   | 0   | 2   | 3   | 0   | 0.1004 | 0.0574 | 0.0 | 0.0 |
| GC vitamin D-binding protein precursor                     | IPI00742696 | 53 kDa  | 62  | 42  | 48  | 53  | 58  | 70  | 52  | 50  | 64  | 0.1588 | 0.4162 | 1.3 | 1.2 |
| GCHFR GTP cyclohydrolase 1 feedback regulatory protein     | IPI00217253 | 10 kDa  | 32  | 22  | 19  | 19  | 12  | 14  | 27  | 19  | 13  | 0.0256 | 0.1151 | 0.7 | 0.5 |
| GDF15 Growth/differentiation factor 15 precursor           | IPI00306543 | 34 kDa  | 16  | 15  | 11  | 7   | 9   | 11  | 15  | 9   | 10  | 0.7027 | 0.0318 | 1.1 | 0.6 |
| GDI2 Rab GDP dissociation inhibitor beta                   | IPI00031461 | 51 kDa  | 7   | 12  | 4   | 11  | 4   | 3   | 10  | 8   | 4   | 0.3847 | 0.1443 | 0.5 | 0.4 |
| GGH Gamma-glutamyl hydrolase precursor                     | IPI00023728 | 36 kDa  | 52  | 36  | 50  | 40  | 28  | 27  | 44  | 45  | 27  | 0.0628 | 0.1666 | 0.6 | 0.6 |
| GGT1 Isoform 1 of Gamma-glutamyltranspeptidase 1 precu     | IPI00018901 | 61 kDa  | 17  | 19  | 25  | 19  | 9   | 8   | 18  | 22  | 8   | 0.0567 | 0.0169 | 0.4 | 0.5 |
| GGT6 Isoform 1 of Gamma-glutamyltransferase 6 precurs      | IPI00440764 | 51 kDa  | 4   | 3   | 3   | 3   | 0   | 0   | 3   | 3   | 0   | 0.0001 | 0.0081 | 0.0 | 0.0 |
| GLA Alpha-galactosidase A precursor                        | IPI00025869 | 49 kDa  | 36  | 21  | 15  | 13  | 7   | 12  | 28  | 14  | 9   | 0.2080 | 0.1355 | 0.7 | 0.3 |
| GLB1 galactosidase, beta 1 isoform b                       | IPI00797646 | 73 kDa  | 78  | 86  | 44  | 57  | 19  | 34  | 82  | 51  | 27  | 0.1368 | 0.0243 | 0.5 | 0.3 |
| GLG1 golgi apparatus protein 1                             | IPI00414717 | 137 kDa | 24  | 38  | 23  | 29  | 23  | 25  | 31  | 26  | 24  | 0.5267 | 0.4206 | 0.9 | 0.8 |
| GLO1 Lactoylglutathione lyase                              | IPI00220766 | 21 kDa  | 7   | 4   | 2   | 5   | 0   | 1   | 6   | 4   | 1   | 0.1950 | 0.0953 | 0.1 | 0.1 |
| GLOD4 Uncharacterized protein C17orf25                     | IPI00007102 | 55 kDa  | 7   | 2   | 1   | 3   | 0   | 0   | 5   | 2   | 0   | 0.1789 | 0.2187 | 0.0 | 0.0 |
| GLRX Glutaredoxin-1                                        | IPI00219025 | 12 kDa  | 6   | 4   | 2   | 3   | 3   | 4   | 5   | 3   | 4   | 0.2326 | 0.3941 | 1.5 | 0.8 |
| GLTP Glycolipid transfer protein                           | IPI00184363 | 24 kDa  | 2   | 2   | 1   | 2   | 2   | 0   | 2   | 2   | 1   | 0.7382 | 0.4294 | 0.7 | 0.5 |
| GM2A Ganglioside GM2 activator precursor                   | IPI00018236 | 21 kDa  | 82  | 72  | 39  | 59  | 67  | 56  | 77  | 49  | 61  | 0.3915 | 0.1743 | 1.3 | 0.8 |
| GMFB GMFB protein                                          | IPI00412987 | 18 kDa  | 0   | 2   | 2   | 0   | 0   | 0   | 1   | 1   | 0   | 0.4226 | 0.4226 | 0.0 | 0.0 |
| GMPR2 GMP reductase 2                                      | IPI00009844 | 38 kDa  | 2   | 1   | 0   | 0   | 0   | 0   | 2   | 0   | 0   | -      | 0.1357 | -   | 0.0 |

|                                                             |             |         |     |     |     |     |     |     |     |     |     |        |        |     |     |
|-------------------------------------------------------------|-------------|---------|-----|-----|-----|-----|-----|-----|-----|-----|-----|--------|--------|-----|-----|
| GNA11 Guanine nucleotide-binding protein subunit alpha-     | IPI00305551 | 42 kDa  | 4   | 2   | 2   | 3   | 11  | 9   | 3   | 3   | 10  | 0.0314 | 0.0402 | 3.8 | 3.5 |
| GNA13 Guanine nucleotide-binding protein alpha-13 subu      | IPI00290928 | 44 kDa  | 6   | 4   | 5   | 6   | 10  | 6   | 5   | 6   | 8   | 0.3093 | 0.2530 | 1.4 | 1.6 |
| GNAI1 Guanine nucleotide-binding protein G(i), alpha-1 su   | IPI00337415 | 40 kDa  | 8   | 6   | 8   | 7   | 15  | 8   | 7   | 8   | 11  | 0.4624 | 0.4097 | 1.5 | 1.6 |
| GNAI2 Isoform 1 of Guanine nucleotide-binding protein G(i)  | IPI00748145 | 40 kDa  | 8   | 6   | 6   | 8   | 14  | 10  | 7   | 7   | 12  | 0.2046 | 0.2083 | 1.6 | 1.7 |
| GNAI3 Guanine nucleotide-binding protein G                  | IPI00220578 | 41 kDa  | 7   | 6   | 8   | 10  | 14  | 10  | 7   | 9   | 12  | 0.4127 | 0.1537 | 1.3 | 1.8 |
| GNAQ Guanine nucleotide binding protein                     | IPI00288947 | 42 kDa  | 2   | 2   | 0   | 0   | 7   | 2   | 2   | 0   | 4   | 0.1885 | 0.4333 | -   | 2.0 |
| GNAS Isoform XLas-1 of Guanine nucleotide-binding protei    | IPI00095891 | 111 kDa | 8   | 8   | 6   | 8   | 10  | 13  | 8   | 7   | 11  | 0.1486 | 0.1673 | 1.6 | 1.4 |
| GNB1 Guanine nucleotide-binding protein G(I)/G(S)/G(T) s1   | IPI00026268 | 37 kDa  | 12  | 13  | 13  | 16  | 15  | 14  | 12  | 14  | 15  | 0.7573 | 0.1318 | 1.0 | 1.2 |
| GNB2 Guanine nucleotide-binding protein G(I)/G(S)/G(T) s1   | IPI00003348 | 37 kDa  | 14  | 13  | 13  | 13  | 15  | 17  | 14  | 13  | 16  | 0.0795 | 0.1474 | 1.2 | 1.2 |
| GNG12 Guanine nucleotide-binding protein G(I)/G(S)/G(O)     | IPI00221232 | 8 kDa   | 4   | 7   | 5   | 3   | 4   | 3   | 5   | 4   | 4   | 0.7837 | 0.4957 | 0.9 | 0.7 |
| GNS N-acetylglucosamine-6-sulfatase precursor               | IPI00012102 | 62 kDa  | 100 | 111 | 67  | 62  | 101 | 90  | 105 | 64  | 96  | 0.0347 | 0.3532 | 1.5 | 0.9 |
| GOLM1 Golgi membrane protein 1                              | IPI00171411 | 46 kDa  | 55  | 63  | 78  | 54  | 53  | 33  | 59  | 66  | 43  | 0.2793 | 0.2672 | 0.7 | 0.7 |
| GOT1 Aspartate aminotransferase, cytoplasmic                | IPI00219029 | 46 kDa  | 11  | 10  | 5   | 5   | 1   | 1   | 10  | 5   | 1   | 0.0002 | 0.0018 | 0.2 | 0.1 |
| GP1BA platelet glycoprotein Ib alpha polypeptide precurs    | IPI00748955 | 70 kDa  | 8   | 11  | 7   | 7   | 15  | 15  | 10  | 7   | 15  | 0.0007 | 0.0525 | 2.1 | 1.6 |
| GP2 zymogen granule membrane glycoprotein 2 isoform 2       | IPI00470823 | 59 kDa  | 2   | 2   | 4   | 2   | 4   | 0   | 2   | 3   | 2   | 0.7351 | 0.9995 | 0.7 | 1.0 |
| GP5 Platelet glycoprotein V precursor                       | IPI00027410 | 61 kDa  | 2   | 3   | 1   | 2   | 0   | 0   | 3   | 2   | 0   | 0.0905 | 0.0122 | 0.0 | 0.0 |
| GP6 Isoform 3 of Platelet glycoprotein VI precursor         | IPI00102300 | 67 kDa  | 23  | 22  | 16  | 21  | 22  | 18  | 22  | 18  | 20  | 0.6097 | 0.3595 | 1.1 | 0.9 |
| GPC1 Glypican-1 precursor                                   | IPI00015688 | 62 kDa  | 24  | 20  | 8   | 10  | 10  | 3   | 22  | 9   | 7   | 0.4978 | 0.0581 | 0.7 | 0.3 |
| GPC3 Glypican-3 precursor                                   | IPI00019907 | 66 kDa  | 26  | 41  | 13  | 14  | 11  | 14  | 34  | 14  | 12  | 0.5823 | 0.1046 | 0.9 | 0.4 |
| GPC4 Glypican-4 precursor                                   | IPI00232571 | 62 kDa  | 13  | 6   | 12  | 12  | 2   | 0   | 10  | 12  | 1   | 0.0112 | 0.1523 | 0.1 | 0.1 |
| GPD1 Glycerol-3-phosphate dehydrogenase [NAD+], cytop       | IPI00295777 | 38 kDa  | 6   | 7   | 7   | 7   | 4   | 1   | 6   | 7   | 3   | 0.1102 | 0.1630 | 0.4 | 0.4 |
| GPI Glucose-6-phosphate isomerase                           | IPI00027497 | 63 kDa  | 8   | 3   | 3   | 3   | 0   | 3   | 6   | 3   | 2   | 0.4421 | 0.3229 | 0.5 | 0.3 |
| GPR116 Isoform 1 of Probable G-protein coupled receptor     | IPI00437186 | 149 kDa | 12  | 16  | 8   | 10  | 10  | 11  | 14  | 9   | 10  | 0.4711 | 0.2145 | 1.1 | 0.7 |
| GPR180 Integral membrane protein GPR180 precursor           | IPI00646291 | 49 kDa  | 7   | 6   | 7   | 8   | 0   | 2   | 7   | 8   | 1   | 0.0280 | 0.0461 | 0.1 | 0.2 |
| GPR56 G protein-coupled receptor 56 isoform b               | IPI00397949 | 77 kDa  | 4   | 2   | 1   | 3   | 0   | 0   | 3   | 2   | 0   | 0.1789 | 0.0727 | 0.0 | 0.0 |
| GPR98 Isoform 1 of G-protein coupled receptor 98 precurs    | IPI00165934 | 693 kDa | 0   | 2   | 0   | 0   | 0   | 0   | 1   | 0   | 0   | -      | 0.4226 | -   | 0.0 |
| GPRC5B G-protein coupled receptor family C group 5 mem      | IPI00008239 | 45 kDa  | 37  | 28  | 16  | 21  | 29  | 42  | 33  | 18  | 35  | 0.1383 | 0.7733 | 1.9 | 1.1 |
| GPRC5C CDNA FLJ20242 fis, clone COLF6369                    | IPI00004901 | 18 kDa  | 55  | 77  | 56  | 63  | 91  | 114 | 66  | 60  | 103 | 0.0677 | 0.1453 | 1.7 | 1.6 |
| GPX3 Glutathione peroxidase 3 precursor                     | IPI00026199 | 26 kDa  | 32  | 26  | 25  | 22  | 7   | 3   | 29  | 24  | 5   | 0.0174 | 0.0214 | 0.2 | 0.2 |
| GRHPR Glyoxylate reductase/hydroxypyruvate reductase        | IPI00037448 | 36 kDa  | 1   | 0   | 2   | 2   | 0   | 0   | 1   | 2   | 0   | 0.0001 | 0.4226 | 0.0 | 0.0 |
| GRN Isoform 1 of Granulins precursor                        | IPI00296713 | 64 kDa  | 47  | 84  | 59  | 41  | 45  | 65  | 65  | 50  | 55  | 0.7504 | 0.6816 | 1.1 | 0.8 |
| GSN Isoform 2 of Gelsolin precursor                         | IPI00646773 | 81 kDa  | 78  | 84  | 138 | 115 | 152 | 148 | 81  | 126 | 150 | 0.1760 | 0.0026 | 1.2 | 1.9 |
| GSR Isoform Mitochondrial of Glutathione reductase, mito    | IPI00016862 | 56 kDa  | 2   | 2   | 0   | 1   | 0   | 0   | 2   | 1   | 0   | 0.4226 | 0.0081 | 0.0 | 0.0 |
| GSS Glutathione synthetase                                  | IPI00010706 | 52 kDa  | 2   | 2   | 2   | 2   | 0   | 1   | 2   | 2   | 1   | 0.1012 | 0.1010 | 0.3 | 0.2 |
| GSTA1 Glutathione S-transferase A1                          | IPI00657682 | 26 kDa  | 12  | 13  | 3   | 11  | 2   | 2   | 12  | 7   | 2   | 0.3394 | 0.0024 | 0.3 | 0.2 |
| GSTM3 Glutathione S-transferase Mu 3                        | IPI00246975 | 27 kDa  | 10  | 2   | 5   | 10  | 4   | 1   | 6   | 8   | 3   | 0.2349 | 0.5374 | 0.3 | 0.5 |
| GSTO1 Glutathione transferase omega-1                       | IPI00019755 | 28 kDa  | 2   | 2   | 2   | 1   | 0   | 1   | 2   | 2   | 1   | 0.3058 | 0.1010 | 0.3 | 0.2 |
| GSTP1 Glutathione S-transferase P                           | IPI00219757 | 23 kDa  | 16  | 15  | 6   | 19  | 3   | 4   | 15  | 12  | 4   | 0.2935 | 0.0025 | 0.3 | 0.2 |
| GUCA2A Guanylin precursor                                   | IPI00026926 | 12 kDa  | 14  | 12  | 21  | 14  | 19  | 20  | 13  | 18  | 20  | 0.6684 | 0.0491 | 1.1 | 1.5 |
| GUCA2B Guanylate cyclase activator 2B precursor             | IPI00003437 | 12 kDa  | 1   | 0   | 1   | 0   | 4   | 4   | 1   | 1   | 4   | 0.0189 | 0.0248 | 8.2 | 7.3 |
| GUSB Isoform Long of Beta-glucuronidase precursor           | IPI00027745 | 75 kDa  | 34  | 33  | 19  | 25  | 10  | 10  | 33  | 22  | 10  | 0.0522 | 0.0002 | 0.4 | 0.3 |
| HAVCR2 Isoform 2 of Hepatitis A virus cellular receptor 2 p | IPI00383032 | 16 kDa  | 42  | 33  | 43  | 33  | 57  | 57  | 37  | 38  | 57  | 0.0676 | 0.0487 | 1.5 | 1.5 |
| HBA2;HBA1 Hemoglobin subunit alpha                          | IPI00410714 | 15 kDa  | 22  | 18  | 24  | 20  | 2   | 1   | 20  | 22  | 2   | 0.0137 | 0.0105 | 0.1 | 0.1 |
| HBB Hemoglobin subunit beta                                 | IPI00654755 | 16 kDa  | 35  | 33  | 43  | 39  | 0   | 0   | 34  | 41  | 0   | 0.0024 | 0.0007 | 0.0 | 0.0 |
| HEBP1 Heme-binding protein 1                                | IPI00148063 | 21 kDa  | 8   | 1   | 0   | 3   | 1   | 0   | 5   | 2   | 1   | 0.6047 | 0.3828 | 0.4 | 0.1 |
| HEG1 Isoform 1 of Protein HEG homolog 1 precursor           | IPI00297263 | 147 kDa | 13  | 15  | 4   | 5   | 17  | 11  | 14  | 5   | 14  | 0.0928 | 0.8896 | 2.9 | 1.0 |
| HEXA Beta-hexosaminidase subunit alpha precursor            | IPI00027851 | 61 kDa  | 17  | 13  | 7   | 8   | 10  | 14  | 15  | 8   | 12  | 0.1877 | 0.3970 | 1.5 | 0.8 |

|                                                             |             |         |     |     |     |     |     |     |     |     |     |        |        |     |     |
|-------------------------------------------------------------|-------------|---------|-----|-----|-----|-----|-----|-----|-----|-----|-----|--------|--------|-----|-----|
| HEXB Beta-hexosaminidase subunit beta precursor             | IPI00012585 | 63 kDa  | 20  | 22  | 10  | 7   | 12  | 6   | 21  | 8   | 9   | 0.7996 | 0.0559 | 1.1 | 0.4 |
| HGFAC Hepatocyte growth factor activator precursor          | IPI00029193 | 71 kDa  | 12  | 15  | 19  | 20  | 8   | 5   | 13  | 19  | 7   | 0.0087 | 0.0674 | 0.3 | 0.5 |
| HIBCH Isoform 1 of 3-hydroxyisobutyryl-CoA hydrolase, mi    | IPI00419802 | 43 kDa  | 1   | 2   | 0   | 0   | 0   | 0   | 2   | 0   | 0   | -      | 0.0574 | -   | 0.0 |
| HIST1H1B Histone H1.5                                       | IPI00217468 | 23 kDa  | 0   | 0   | 6   | 17  | 2   | 2   | 0   | 11  | 2   | 0.2106 | 0.0002 | 0.2 | -   |
| HIST1H1C Histone H1.2                                       | IPI00217465 | 21 kDa  | 7   | 7   | 10  | 18  | 9   | 4   | 7   | 14  | 7   | 0.2683 | 0.8305 | 0.5 | 0.9 |
| HIST1H2AE;HIST1H2AB Histone H2A type 1-B                    | IPI00026272 | 14 kDa  | 6   | 7   | 11  | 7   | 4   | 2   | 6   | 9   | 3   | 0.1074 | 0.1206 | 0.4 | 0.5 |
| HIST1H2BL Histone H2B type 1-L                              | IPI00018534 | 14 kDa  | 4   | 9   | 2   | 7   | 2   | 3   | 6   | 5   | 3   | 0.5295 | 0.3218 | 0.6 | 0.4 |
| HIST2H3A;HIST2H3C;HIST2H3D Histone H3.2                     | IPI00171611 | 15 kDa  | 8   | 6   | 10  | 8   | 3   | 4   | 7   | 9   | 4   | 0.0235 | 0.1197 | 0.4 | 0.5 |
| HIST2H4A;HIST1H4C;HIST1H4A;HIST1H4I;HIST1H4E;HIST1H         | IPI00453473 | 11 kDa  | 24  | 23  | 19  | 22  | 12  | 12  | 23  | 20  | 12  | 0.0245 | 0.0020 | 0.6 | 0.5 |
| HK3 Hexokinase-3                                            | IPI00005118 | 99 kDa  | 0   | 0   | 2   | 2   | 0   | 0   | 0   | 2   | 0   | 0.0001 | -      | 0.0 | -   |
| HMCN1 Hemicentin 1                                          | IPI00045512 | 614 kDa | 31  | 21  | 24  | 18  | 31  | 27  | 26  | 21  | 29  | 0.1832 | 0.6661 | 1.4 | 1.1 |
| HMCN2 similar to hemicentin 2                               | IPI00889133 | 406 kDa | 1   | 5   | 4   | 6   | 4   | 5   | 3   | 5   | 5   | 0.7867 | 0.4588 | 0.9 | 1.6 |
| HNT Neurotrimin variant 3                                   | IPI00442294 | 39 kDa  | 12  | 10  | 12  | 13  | 12  | 13  | 11  | 13  | 12  | 0.9561 | 0.2960 | 1.0 | 1.1 |
| HP Haptoglobin precursor                                    | IPI00641737 | 47 kDa  | 62  | 53  | 78  | 74  | 127 | 146 | 58  | 76  | 136 | 0.0265 | 0.0183 | 1.8 | 2.4 |
| HPD 4-hydroxyphenylpyruvate dioxygenase                     | IPI00218297 | 45 kDa  | 6   | 4   | 5   | 2   | 0   | 0   | 5   | 4   | 0   | 0.1497 | 0.0376 | 0.0 | 0.0 |
| HPN Serine protease hepsin                                  | IPI00395826 | 45 kDa  | 2   | 5   | 2   | 1   | 0   | 0   | 4   | 2   | 0   | 0.1004 | 0.1046 | 0.0 | 0.0 |
| HPRT1 Hypoxanthine-guanine phosphoribosyltransferase        | IPI00218493 | 25 kDa  | 4   | 1   | 1   | 1   | 0   | 0   | 2   | 1   | 0   | 0.0001 | 0.2187 | 0.0 | 0.0 |
| HPX Hemopexin precursor                                     | IPI00022488 | 52 kDa  | 157 | 147 | 122 | 107 | 136 | 109 | 152 | 114 | 123 | 0.6280 | 0.1806 | 1.1 | 0.8 |
| HRG Histidine-rich glycoprotein precursor                   | IPI00022371 | 60 kDa  | 7   | 10  | 3   | 7   | 11  | 4   | 9   | 5   | 8   | 0.5980 | 0.8186 | 1.5 | 0.9 |
| HRNR Hornerin                                               | IPI00398625 | 282 kDa | 17  | 32  | 20  | 13  | 13  | 24  | 24  | 17  | 18  | 0.8177 | 0.5829 | 1.1 | 0.8 |
| HRSP12 Ribonuclease UK114                                   | IPI00005038 | 14 kDa  | 6   | 6   | 4   | 6   | 4   | 4   | 6   | 5   | 4   | 0.4692 | 0.0011 | 0.8 | 0.7 |
| HSP90AA1 heat shock protein 90kDa alpha (cytosolic), clas   | IPI00382470 | 98 kDa  | 11  | 12  | 3   | 3   | 1   | 0   | 11  | 3   | 1   | 0.0424 | 0.0056 | 0.2 | 0.0 |
| HSP90B1 Endoplasmic precursor                               | IPI00027230 | 92 kDa  | 4   | 8   | 1   | 1   | 0   | 0   | 6   | 1   | 0   | 0.0001 | 0.1190 | 0.0 | 0.0 |
| HSPA1B;HSPA1A Heat shock 70 kDa protein 1                   | IPI00304925 | 70 kDa  | 13  | 14  | 13  | 12  | 4   | 8   | 14  | 13  | 6   | 0.0517 | 0.0416 | 0.5 | 0.4 |
| HSPA5 HSPA5 protein                                         | IPI00003362 | 72 kDa  | 23  | 21  | 10  | 9   | 3   | 0   | 22  | 9   | 2   | 0.0424 | 0.0085 | 0.2 | 0.1 |
| HSPA8 Isoform 1 of Heat shock cognate 71 kDa protein        | IPI00003865 | 71 kDa  | 35  | 43  | 24  | 21  | 12  | 13  | 39  | 23  | 12  | 0.0329 | 0.0237 | 0.6 | 0.3 |
| HSPB1 Heat shock protein beta-1                             | IPI00025512 | 23 kDa  | 4   | 4   | 4   | 3   | 1   | 1   | 4   | 4   | 1   | 0.0447 | 0.0055 | 0.3 | 0.3 |
| HSPE1 10 kDa heat shock protein, mitochondrial              | IPI00220362 | 11 kDa  | 5   | 2   | 3   | 2   | 2   | 1   | 3   | 3   | 2   | 0.3379 | 0.3631 | 0.6 | 0.5 |
| HSPG2 Basement membrane-specific heparan sulfate prot       | IPI00024284 | 469 kDa | 382 | 362 | 435 | 506 | 388 | 390 | 372 | 471 | 389 | 0.1481 | 0.2431 | 0.8 | 1.0 |
| HYAL1 Isoform 2 of Hyaluronidase-1 precursor                | IPI00168847 | 45 kDa  | 6   | 4   | 10  | 7   | 1   | 0   | 5   | 8   | 1   | 0.0252 | 0.0598 | 0.1 | 0.1 |
| ICAM1 Intercellular adhesion molecule 1 precursor           | IPI00008494 | 58 kDa  | 36  | 32  | 18  | 20  | 31  | 15  | 34  | 19  | 23  | 0.6581 | 0.3068 | 1.2 | 0.7 |
| ICAM2 Intercellular adhesion molecule 2 precursor           | IPI00009477 | 31 kDa  | 14  | 9   | 12  | 9   | 11  | 10  | 12  | 10  | 10  | 0.9209 | 0.6723 | 1.0 | 0.9 |
| ICOSLG Isoform 1 of ICOS ligand precursor                   | IPI00219131 | 33 kDa  | 26  | 36  | 26  | 34  | 41  | 40  | 31  | 30  | 40  | 0.1253 | 0.2030 | 1.3 | 1.3 |
| IDH1 Isocitrate dehydrogenase [NADP] cytoplasmic            | IPI00027223 | 47 kDa  | 10  | 16  | 7   | 11  | 2   | 4   | 13  | 9   | 3   | 0.1114 | 0.1053 | 0.3 | 0.3 |
| IDS Isoform Short of Iduronate 2-sulfatase precursor        | IPI00006121 | 38 kDa  | 0   | 1   | 0   | 0   | 2   | 0   | 1   | 0   | 1   | 0.4226 | 0.6686 | -   | 2.2 |
| IFNAR2 Isoform 1 of Interferon-alpha/beta receptor beta c   | IPI00010193 | 58 kDa  | 1   | 3   | 3   | 1   | 3   | 0   | 2   | 2   | 2   | 0.8384 | 0.8335 | 0.8 | 0.8 |
| IGF2R Cation-independent mannose-6-phosphate receptor       | IPI00289819 | 274 kDa | 96  | 93  | 113 | 87  | 41  | 60  | 94  | 100 | 50  | 0.0933 | 0.0462 | 0.5 | 0.5 |
| IGFALS Insulin-like growth factor-binding protein complex   | IPI00020996 | 66 kDa  | 1   | 1   | 14  | 6   | 0   | 0   | 1   | 10  | 0   | 0.1182 | 0.0081 | 0.0 | 0.0 |
| IGFBP2 Insulin-like growth factor-binding protein 2 precurs | IPI00297284 | 35 kDa  | 34  | 24  | 24  | 26  | 11  | 10  | 29  | 25  | 10  | 0.0047 | 0.0622 | 0.4 | 0.4 |
| IGFBP3 Insulin-like growth factor-binding protein 3 precurs | IPI00018305 | 32 kDa  | 4   | 4   | 2   | 3   | 2   | 2   | 4   | 3   | 2   | 0.4692 | 0.0153 | 0.8 | 0.6 |
| IGFBP6 Insulin-like growth factor-binding protein 6 precurs | IPI00029235 | 25 kDa  | 4   | 2   | 3   | 2   | 1   | 3   | 3   | 3   | 2   | 0.7357 | 0.6781 | 0.8 | 0.8 |
| IGFBP7 Insulin-like growth factor-binding protein 7 precurs | IPI00016915 | 29 kDa  | 137 | 116 | 104 | 77  | 111 | 125 | 126 | 90  | 118 | 0.2096 | 0.5610 | 1.3 | 0.9 |
| IGHG1 IGHG1 protein                                         | IPI00448925 | 60 kDa  | 343 | 324 | 435 | 426 | 334 | 288 | 333 | 430 | 311 | 0.0379 | 0.4690 | 0.7 | 0.9 |
| IGHG1 IGHG1 protein                                         | IPI00815926 | 52 kDa  | 370 | 361 | 460 | 462 | 359 | 311 | 366 | 461 | 335 | 0.0338 | 0.3312 | 0.7 | 0.9 |
| IGHG1 Putative uncharacterized protein DKFz686O01196        | IPI00423463 | 53 kDa  | 319 | 305 | 389 | 387 | 309 | 271 | 312 | 388 | 290 | 0.0368 | 0.3944 | 0.7 | 0.9 |
| IGHG2 Putative uncharacterized protein                      | IPI00784807 | 51 kDa  | 330 | 351 | 429 | 429 | 407 | 390 | 340 | 429 | 398 | 0.0735 | 0.0518 | 0.9 | 1.2 |
| IGHG3 IGHG3 protein                                         | IPI00472345 | 57 kDa  | 247 | 265 | 333 | 321 | 288 | 275 | 256 | 327 | 282 | 0.0365 | 0.1510 | 0.9 | 1.1 |

|                                                                  |             |         |     |     |     |     |     |     |     |     |     |        |        |      |      |
|------------------------------------------------------------------|-------------|---------|-----|-----|-----|-----|-----|-----|-----|-----|-----|--------|--------|------|------|
| IGHG4 IGHG4 protein                                              | IPI00550640 | 52 kDa  | 167 | 171 | 204 | 212 | 200 | 192 | 169 | 208 | 196 | 0.1650 | 0.0270 | 0.9  | 1.2  |
| IGHM IGHM protein                                                | IPI00472610 | 53 kDa  | 421 | 427 | 523 | 535 | 458 | 434 | 424 | 529 | 446 | 0.0250 | 0.2211 | 0.8  | 1.1  |
| IGHM IGHM protein                                                | IPI00477090 | 67 kDa  | 78  | 87  | 133 | 167 | 138 | 121 | 82  | 150 | 129 | 0.3807 | 0.0370 | 0.9  | 1.6  |
| IGHV3OR16-13;IGHA1 IGH A1 protein                                | IPI00430842 | 53 kDa  | 212 | 216 | 330 | 340 | 183 | 213 | 214 | 335 | 198 | 0.0127 | 0.3876 | 0.6  | 0.9  |
| IGHV3OR16-13;IGHA1 IGH A1 protein                                | IPI00166866 | 53 kDa  | 207 | 211 | 327 | 316 | 169 | 198 | 209 | 321 | 183 | 0.0119 | 0.2107 | 0.6  | 0.9  |
| IGHV3OR16-13;IGHA1 IGH A1 protein                                | IPI00744561 | 53 kDa  | 182 | 170 | 299 | 280 | 0   | 173 | 176 | 289 | 86  | 0.1450 | 0.4092 | 0.3  | 0.5  |
| IGHV4-31 IGHV4-31 protein                                        | IPI00784822 | 51 kDa  | 307 | 283 | 377 | 358 | 286 | 252 | 295 | 368 | 269 | 0.0365 | 0.3391 | 0.7  | 0.9  |
| IGJ immunoglobulin J chain                                       | IPI00178926 | 18 kDa  | 22  | 18  | 17  | 25  | 11  | 14  | 20  | 21  | 12  | 0.1842 | 0.0877 | 0.6  | 0.6  |
| IGK@ IGK@ protein                                                | IPI00784865 | 26 kDa  | 631 | 573 | 618 | 676 | 943 | 885 | 602 | 647 | 914 | 0.0229 | 0.0169 | 1.4  | 1.5  |
| IGKC IGKC protein                                                | IPI00472961 | 26 kDa  | 621 | 566 | 606 | 662 | 915 | 872 | 594 | 634 | 894 | 0.0181 | 0.0135 | 1.4  | 1.5  |
| IGKC IGKC protein                                                | IPI00845354 | 25 kDa  | 565 | 515 | 558 | 591 | 827 | 802 | 540 | 575 | 815 | 0.0075 | 0.0102 | 1.4  | 1.5  |
| IGKC IGKC protein                                                | IPI00746963 | 26 kDa  | 615 | 559 | 603 | 659 | 910 | 0   | 587 | 631 | 455 | 0.7366 | 0.7993 | 0.7  | 0.8  |
| IGKV1-5 IGKV1-5 protein                                          | IPI00419424 | 26 kDa  | 632 | 579 | 624 | 674 | 945 | 906 | 605 | 649 | 926 | 0.0130 | 0.0104 | 1.4  | 1.5  |
| IGKV1-5 IGKV1-5 protein                                          | IPI00478600 | 26 kDa  | 0   | 556 | 603 | 659 | 910 | 861 | 278 | 631 | 885 | 0.0211 | 0.1615 | 1.4  | 3.2  |
| IGKV2-24 IGKV2-24 protein                                        | IPI00440577 | 26 kDa  | 619 | 568 | 606 | 664 | 931 | 866 | 593 | 635 | 899 | 0.0259 | 0.0176 | 1.4  | 1.5  |
| IGKV3-20 IGK@ protein                                            | IPI00889156 | 26 kDa  | 645 | 586 | 646 | 701 | 967 | 909 | 616 | 673 | 938 | 0.0220 | 0.0160 | 1.4  | 1.5  |
| IGL@ IGL@ protein                                                | IPI00829626 | 25 kDa  | 222 | 188 | 206 | 211 | 336 | 323 | 205 | 209 | 329 | 0.0030 | 0.0203 | 1.6  | 1.6  |
| IGL@ IGL@ protein                                                | IPI00745660 | 25 kDa  | 170 | 150 | 162 | 170 | 212 | 206 | 160 | 166 | 209 | 0.0130 | 0.0436 | 1.3  | 1.3  |
| IGL@ IGL@ protein                                                | IPI00829877 | 25 kDa  | 181 | 163 | 166 | 169 | 279 | 245 | 172 | 168 | 262 | 0.0322 | 0.0441 | 1.6  | 1.5  |
| IGLV1-40 V1-13 protein (Fragment)                                | IPI00789259 | 10 kDa  | 1   | 1   | 2   | 1   | 3   | 4   | 1   | 2   | 4   | 0.0942 | 0.0335 | 2.4  | 3.5  |
| IGLV1-44 Anti-streptococcal/anti-myosin immunoglobulin           | IPI00827522 | 12 kDa  | 5   | 12  | 0   | 10  | 15  | 13  | 8   | 5   | 14  | 0.2344 | 0.2712 | 2.7  | 1.7  |
| IGLV2-18 V1-5 protein                                            | IPI00553215 | 13 kDa  | 4   | 2   | 2   | 5   | 8   | 8   | 3   | 4   | 8   | 0.1227 | 0.0268 | 2.1  | 2.7  |
| IGLV3-27 V2-19 protein                                           | IPI00552852 | 12 kDa  | 0   | 3   | 3   | 1   | 6   | 8   | 2   | 2   | 7   | 0.0957 | 0.1092 | 3.1  | 4.3  |
| IGLV7-46 V3-3 protein                                            | IPI00553092 | 12 kDa  | 0   | 1   | 0   | 1   | 8   | 5   | 1   | 1   | 7   | 0.0422 | 0.0415 | 12.6 | 13.1 |
| IGSF8 Isoform 1 of Immunoglobulin superfamily member 8           | IPI00056478 | 65 kDa  | 32  | 23  | 29  | 22  | 24  | 33  | 28  | 25  | 29  | 0.5936 | 0.8862 | 1.1  | 1.0  |
| IL10RB Protein                                                   | IPI00788962 | 34 kDa  | 7   | 9   | 10  | 9   | 6   | 3   | 8   | 9   | 4   | 0.0476 | 0.1240 | 0.5  | 0.5  |
| IL18BP interleukin 18 binding protein precursor                  | IPI00220525 | 21 kDa  | 30  | 25  | 16  | 16  | 23  | 14  | 27  | 16  | 19  | 0.6003 | 0.2276 | 1.2  | 0.7  |
| IL1R2 Interleukin-1 receptor type II precursor                   | IPI00021382 | 45 kDa  | 2   | 2   | 1   | 5   | 1   | 4   | 2   | 3   | 3   | 0.8866 | 0.7862 | 0.9  | 1.2  |
| IL1RN Isoform 1 of Interleukin-1 receptor antagonist protein     | IPI00000045 | 20 kDa  | 0   | 2   | 0   | 0   | 0   | 0   | 1   | 0   | 0   | -      | 0.4226 | -    | 0.0  |
| IL2RB Interleukin-2 receptor subunit beta precursor              | IPI00027510 | 61 kDa  | 4   | 0   | 2   | 2   | 3   | 0   | 2   | 2   | 2   | 0.8132 | 0.9572 | 0.8  | 0.9  |
| IL6ST Isoform 1 of Interleukin-6 receptor subunit beta precursor | IPI00297124 | 104 kDa | 24  | 21  | 19  | 23  | 30  | 27  | 22  | 21  | 28  | 0.0886 | 0.1077 | 1.4  | 1.3  |
| INADL Isoform 2 of InaD-like protein                             | IPI00170791 | 174 kDa | 0   | 1   | 0   | 0   | 2   | 4   | 1   | 0   | 3   | 0.0901 | 0.1414 | -    | 6.5  |
| IQGAP1 Ras GTPase-activating-like protein IQGAP1                 | IPI00009342 | 189 kDa | 6   | 9   | 2   | 2   | 6   | 10  | 7   | 2   | 8   | 0.1187 | 0.9769 | 3.6  | 1.0  |
| ISLR Immunoglobulin superfamily containing leucine-rich repeats  | IPI00023648 | 46 kDa  | 23  | 14  | 19  | 9   | 11  | 14  | 18  | 14  | 12  | 0.7689 | 0.3300 | 0.9  | 0.7  |
| ITFG1 T-cell immunomodulatory protein precursor                  | IPI00006547 | 68 kDa  | 6   | 7   | 11  | 5   | 6   | 4   | 6   | 8   | 5   | 0.3943 | 0.1786 | 0.6  | 0.8  |
| ITFG3 Protein                                                    | IPI00658177 | 21 kDa  | 5   | 3   | 4   | 2   | 0   | 0   | 4   | 3   | 0   | 0.1004 | 0.0492 | 0.0  | 0.0  |
| ITGA3 Isoform Alpha-3A of Integrin alpha-3 precursor             | IPI00215995 | 117 kDa | 4   | 3   | 1   | 2   | 2   | 2   | 3   | 2   | 2   | 0.3523 | 0.0642 | 1.4  | 0.7  |
| ITGAV Isoform 1 of Integrin alpha-V precursor                    | IPI00027505 | 116 kDa | 1   | 1   | 0   | 0   | 1   | 2   | 1   | 0   | 2   | 0.0901 | 0.4289 | -    | 1.5  |
| ITGB1 integrin beta 1 isoform 1A precursor                       | IPI00645194 | 88 kDa  | 2   | 10  | 6   | 3   | 9   | 4   | 6   | 5   | 7   | 0.5800 | 0.9442 | 1.4  | 1.1  |
| ITIH1 Inter-alpha-trypsin inhibitor heavy chain H1 precursor     | IPI00292530 | 101 kDa | 10  | 6   | 4   | 2   | 0   | 1   | 8   | 3   | 1   | 0.1628 | 0.0607 | 0.2  | 0.1  |
| ITIH2 Inter-alpha-trypsin inhibitor heavy chain H2 precursor     | IPI00305461 | 106 kDa | 7   | 9   | 11  | 5   | 0   | 0   | 8   | 8   | 0   | 0.1004 | 0.0122 | 0.0  | 0.0  |
| ITIH3 Isoform 1 of Inter-alpha-trypsin inhibitor heavy chain H3  | IPI00028413 | 100 kDa | 2   | 0   | 3   | 0   | 0   | 0   | 1   | 2   | 0   | 0.4226 | 0.4226 | 0.0  | 0.0  |
| ITIH4 inter-alpha (globulin) inhibitor H4                        | IPI00896419 | 103 kDa | 221 | 158 | 187 | 184 | 132 | 112 | 189 | 186 | 122 | 0.0250 | 0.1770 | 0.7  | 0.6  |
| ITIH5 inter-alpha trypsin inhibitor heavy chain precursor 5      | IPI00328829 | 106 kDa | 7   | 5   | 3   | 2   | 0   | 0   | 6   | 3   | 0   | 0.0417 | 0.0309 | 0.0  | 0.0  |
| ITLN1 Intellectin-1 precursor                                    | IPI00291737 | 35 kDa  | 4   | 0   | 2   | 1   | 0   | 0   | 2   | 2   | 0   | 0.1004 | 0.4226 | 0.0  | 0.0  |
| ITM2B Integral membrane protein 2B                               | IPI00031821 | 30 kDa  | 4   | 3   | 3   | 2   | 2   | 1   | 3   | 3   | 2   | 0.3379 | 0.1211 | 0.6  | 0.5  |
| IVL Involucrin                                                   | IPI00011692 | 68 kDa  | 5   | 13  | 5   | 4   | 1   | 2   | 9   | 5   | 2   | 0.0579 | 0.2206 | 0.3  | 0.2  |

|                                                          |             |         |     |     |     |     |     |     |     |     |     |        |        |      |      |
|----------------------------------------------------------|-------------|---------|-----|-----|-----|-----|-----|-----|-----|-----|-----|--------|--------|------|------|
| JAG1 Protein jagged-1 precursor                          | IPI00099650 | 134 kDa | 6   | 6   | 3   | 5   | 2   | 2   | 6   | 4   | 2   | 0.1832 | 0.0000 | 0.5  | 0.4  |
| JUP JUP protein                                          | IPI00789324 | 82 kDa  | 7   | 9   | 16  | 5   | 6   | 13  | 8   | 11  | 9   | 0.8559 | 0.8003 | 0.9  | 1.1  |
| KHK Isoform C of Ketohexokinase                          | IPI00216136 | 33 kDa  | 4   | 4   | 0   | 0   | 0   | 0   | 4   | 0   | 0   | -      | 0.0028 | -    | 0.0  |
| KIAA0174 Isoform 1 of Uncharacterized protein KIAA0174   | IPI00024660 | 40 kDa  | 44  | 39  | 21  | 34  | 23  | 25  | 42  | 28  | 24  | 0.6223 | 0.0238 | 0.9  | 0.6  |
| KIAA1549 Isoform 1 of UPF0606 protein KIAA1549           | IPI00896475 | 203 kDa | 12  | 14  | 6   | 4   | 7   | 14  | 13  | 5   | 10  | 0.3204 | 0.5500 | 2.0  | 0.8  |
| KIF12 Kinesin-like protein KIF12                         | IPI00062047 | 71 kDa  | 5   | 5   | 1   | 2   | 0   | 0   | 5   | 2   | 0   | 0.0905 | 0.0004 | 0.0  | 0.0  |
| KIRREL Isoform 1 of Kin of IRRE-like protein 1 precursor | IPI00470360 | 84 kDa  | 12  | 13  | 8   | 13  | 3   | 4   | 12  | 11  | 4   | 0.1062 | 0.0066 | 0.3  | 0.3  |
| KIT Mast/stem cell growth factor receptor precursor      | IPI00022296 | 110 kDa | 5   | 4   | 2   | 0   | 0   | 0   | 4   | 1   | 0   | 0.4226 | 0.0081 | 0.0  | 0.0  |
| KL Isoform 1 of Klotho precursor                         | IPI00295265 | 116 kDa | 10  | 3   | 3   | 3   | 3   | 8   | 6   | 3   | 5   | 0.3947 | 0.8415 | 1.7  | 0.9  |
| KLK1 Kallikrein-1 precursor                              | IPI00304808 | 29 kDa  | 66  | 53  | 69  | 67  | 119 | 97  | 59  | 68  | 108 | 0.0706 | 0.0642 | 1.6  | 1.8  |
| KLK11 Isoform 1 of Kallikrein-11 precursor               | IPI00002818 | 27 kDa  | 2   | 4   | 2   | 1   | 2   | 8   | 3   | 2   | 5   | 0.3499 | 0.6107 | 3.1  | 1.5  |
| KLK2 Isoform 1 of Kallikrein-2 precursor                 | IPI00022227 | 29 kDa  | 20  | 15  | 0   | 0   | 0   | 0   | 18  | 0   | 0   | -      | 0.0224 | -    | 0.0  |
| KLK3 Prostate-specific antigen precursor                 | IPI00010858 | 29 kDa  | 153 | 126 | 173 | 155 | 53  | 44  | 140 | 164 | 48  | 0.0070 | 0.0240 | 0.3  | 0.3  |
| KLKB1 Plasma kallikrein precursor                        | IPI00654888 | 71 kDa  | 0   | 1   | 2   | 1   | 0   | 0   | 1   | 2   | 0   | 0.1004 | 0.4226 | 0.0  | 0.0  |
| KNG1 Isoform LMW of Kininogen-1 precursor                | IPI00215894 | 48 kDa  | 675 | 743 | 556 | 573 | 555 | 641 | 709 | 564 | 598 | 0.5259 | 0.1800 | 1.1  | 0.8  |
| KPRP Keratinocyte proline-rich protein                   | IPI00514908 | 64 kDa  | 8   | 10  | 6   | 7   | 3   | 4   | 9   | 7   | 4   | 0.0461 | 0.0293 | 0.6  | 0.4  |
| KREMEN1 Isoform 1 of Kremen protein 1 precursor          | IPI00140177 | 52 kDa  | 4   | 2   | 1   | 3   | 0   | 0   | 3   | 2   | 0   | 0.1789 | 0.0727 | 0.0  | 0.0  |
| KRT1 Keratin, type II cytoskeletal 1                     | IPI00220327 | 66 kDa  | 608 | 608 | 743 | 591 | 538 | 588 | 608 | 667 | 563 | 0.3235 | 0.2165 | 0.8  | 0.9  |
| KRT10 Keratin, type I cytoskeletal 10                    | IPI00009865 | 60 kDa  | 529 | 464 | 582 | 522 | 440 | 436 | 496 | 552 | 438 | 0.0642 | 0.2137 | 0.8  | 0.9  |
| KRT14 Keratin, type I cytoskeletal 14                    | IPI00384444 | 52 kDa  | 163 | 153 | 206 | 193 | 218 | 188 | 158 | 200 | 203 | 0.8591 | 0.1052 | 1.0  | 1.3  |
| KRT16 Keratin, type I cytoskeletal 16                    | IPI00217963 | 51 kDa  | 150 | 133 | 191 | 187 | 208 | 179 | 141 | 189 | 194 | 0.7795 | 0.0884 | 1.0  | 1.4  |
| KRT17 Keratin, type I cytoskeletal 17                    | IPI00450768 | 48 kDa  | 103 | 100 | 129 | 117 | 125 | 113 | 102 | 123 | 119 | 0.6933 | 0.1159 | 1.0  | 1.2  |
| KRT2 Keratin, type II cytoskeletal 2 epidermal           | IPI00021304 | 66 kDa  | 452 | 454 | 402 | 378 | 382 | 406 | 453 | 390 | 394 | 0.8514 | 0.0389 | 1.0  | 0.9  |
| KRT27 Keratin, type I cytoskeletal 27                    | IPI00328103 | 50 kDa  | 60  | 48  | 59  | 57  | 0   | 0   | 54  | 58  | 0   | 0.0004 | 0.0120 | 0.0  | 0.0  |
| KRT28 Keratin 25D                                        | IPI00418663 | 53 kDa  | 96  | 83  | 96  | 91  | 0   | 0   | 89  | 94  | 0   | 0.0008 | 0.0052 | 0.0  | 0.0  |
| KRT31 Keratin, type I cuticular Ha1                      | IPI00032513 | 47 kDa  | 0   | 37  | 40  | 49  | 0   | 96  | 19  | 44  | 48  | 0.9511 | 0.6254 | 1.1  | 2.6  |
| KRT32 Keratin, type I cuticular Ha2                      | IPI00291540 | 50 kDa  | 0   | 32  | 0   | 0   | 0   | 60  | 16  | 0   | 30  | 0.4226 | 0.7198 | -    | 1.9  |
| KRT33B Keratin, type I cuticular Ha3-II                  | IPI00031423 | 46 kDa  | 0   | 0   | 0   | 0   | 0   | 86  | 0   | 0   | 43  | 0.4226 | 0.4226 | -    | -    |
| KRT34 keratin 34                                         | IPI00292715 | 49 kDa  | 0   | 0   | 4   | 9   | 0   | 59  | 0   | 7   | 30  | 0.5230 | 0.4226 | 4.4  | -    |
| KRT35 46 kDa protein                                     | IPI00798228 | 46 kDa  | 0   | 5   | 2   | 11  | 0   | 77  | 3   | 7   | 39  | 0.4987 | 0.4492 | 5.7  | 15.5 |
| KRT35 keratin 35                                         | IPI00294649 | 50 kDa  | 0   | 0   | 0   | 0   | 0   | 56  | 0   | 0   | 28  | 0.4226 | 0.4226 | -    | -    |
| KRT36 Keratin, type I cuticular Ha6                      | IPI00008692 | 52 kDa  | 0   | 0   | 40  | 46  | 0   | 0   | 43  | 0   | 0   | 0.0038 | -      | 0.0  | -    |
| KRT38 Keratin, type I cuticular Ha8                      | IPI00297641 | 50 kDa  | 0   | 0   | 0   | 0   | 0   | 52  | 0   | 0   | 26  | 0.4226 | 0.4226 | -    | -    |
| KRT40;LOC728760 Keratin, type I cytoskeletal 40          | IPI00552959 | 48 kDa  | 0   | 0   | 0   | 0   | 0   | 12  | 0   | 0   | 6   | 0.4226 | 0.4226 | -    | -    |
| KRT5 Keratin, type II cytoskeletal 5                     | IPI00009867 | 62 kDa  | 199 | 186 | 256 | 186 | 223 | 219 | 193 | 221 | 221 | 0.9973 | 0.0530 | 1.0  | 1.1  |
| KRT6A Keratin, type II cytoskeletal 6A                   | IPI00300725 | 60 kDa  | 191 | 173 | 238 | 179 | 240 | 210 | 182 | 209 | 225 | 0.6680 | 0.1277 | 1.1  | 1.2  |
| KRT6C Keratin, type II cytoskeletal 6C                   | IPI00299145 | 60 kDa  | 191 | 173 | 238 | 178 | 235 | 211 | 182 | 208 | 223 | 0.6833 | 0.1075 | 1.1  | 1.2  |
| KRT71 Keratin, type II cytoskeletal 71                   | IPI00061200 | 57 kDa  | 34  | 29  | 35  | 19  | 21  | 24  | 31  | 27  | 22  | 0.6388 | 0.0769 | 0.8  | 0.7  |
| KRT75 Keratin, type II cytoskeletal 75                   | IPI00005859 | 60 kDa  | 73  | 77  | 93  | 60  | 0   | 83  | 75  | 77  | 41  | 0.5111 | 0.5005 | 0.5  | 0.6  |
| KRT77 Keratin 77                                         | IPI00376379 | 62 kDa  | 0   | 65  | 83  | 57  | 0   | 62  | 33  | 70  | 31  | 0.3699 | 0.9785 | 0.4  | 1.0  |
| KRT78 Isoform 1 of Keratin, type II cytoskeletal 78      | IPI00477227 | 57 kDa  | 14  | 17  | 24  | 12  | 0   | 0   | 16  | 18  | 0   | 0.0911 | 0.0069 | 0.0  | 0.0  |
| KRT8 Keratin, type II cytoskeletal 8                     | IPI00554648 | 54 kDa  | 102 | 101 | 108 | 93  | 78  | 0   | 101 | 101 | 39  | 0.2618 | 0.2513 | 0.4  | 0.4  |
| KRT80 Isoform 3 of Keratin, type II cytoskeletal 80      | IPI00375843 | 54 kDa  | 0   | 12  | 21  | 6   | 12  | 12  | 6   | 14  | 12  | 0.8378 | 0.4256 | 0.9  | 2.0  |
| KRT81 Keratin type II cuticular Hb1                      | IPI00760863 | 55 kDa  | 0   | 0   | 0   | 0   | 0   | 147 | 0   | 0   | 74  | 0.4226 | 0.4226 | -    | -    |
| KRT82 Keratin type II cuticular Hb2                      | IPI00300053 | 57 kDa  | 0   | 0   | 0   | 0   | 0   | 50  | 0   | 0   | 25  | 0.4226 | 0.4226 | -    | -    |
| KRT84 Keratin type II cuticular Hb4                      | IPI00300052 | 65 kDa  | 0   | 0   | 0   | 25  | 0   | 60  | 0   | 12  | 30  | 0.6420 | 0.4226 | 2.4  | -    |
| KRT85 Keratin type II cuticular Hb5                      | IPI00032541 | 56 kDa  | 0   | 5   | 5   | 9   | 1   | 151 | 3   | 7   | 76  | 0.4559 | 0.4301 | 10.4 | 30.5 |



|                                                                        |             |         |     |     |     |     |     |     |     |     |     |        |        |     |      |
|------------------------------------------------------------------------|-------------|---------|-----|-----|-----|-----|-----|-----|-----|-----|-----|--------|--------|-----|------|
| KRT86 Keratin type II cuticular Hb6                                    | IPI00182655 | 53 kDa  | 0   | 7   | 7   | 22  | 0   | 184 | 4   | 15  | 92  | 0.4899 | 0.4379 | 6.3 | 26.2 |
| KRT9 Keratin, type I cytoskeletal 9                                    | IPI00019359 | 62 kDa  | 278 | 300 | 401 | 264 | 315 | 284 | 289 | 333 | 300 | 0.6842 | 0.6300 | 0.9 | 1.0  |
| KRTAP11-1 Keratin-associated protein 11-1                              | IPI00216711 | 17 kDa  | 0   | 0   | 0   | 0   | 0   | 4   | 0   | 0   | 2   | 0.4226 | 0.4226 | -   | -    |
| KRTAP13-2 Keratin-associated protein 13-2                              | IPI00373959 | 19 kDa  | 0   | 0   | 0   | 1   | 0   | 4   | 0   | 1   | 2   | 0.5375 | 0.4226 | 4.1 | -    |
| KRTAP24-1 Keratin-associated protein 24-1                              | IPI00414750 | 28 kDa  | 0   | 0   | 0   | 0   | 0   | 3   | 0   | 0   | 2   | 0.4226 | 0.4226 | -   | -    |
| KRTAP3-1;LOC100132802 Keratin-associated protein 3-1                   | IPI00011212 | 11 kDa  | 0   | 0   | 0   | 0   | 0   | 5   | 0   | 0   | 3   | 0.4226 | 0.4226 | -   | -    |
| KRTAP4-3 Keratin-associated protein 4-3                                | IPI00457200 | 21 kDa  | 0   | 0   | 0   | 0   | 0   | 3   | 0   | 0   | 2   | 0.4226 | 0.4226 | -   | -    |
| KRTAP4-4 Keratin-associated protein 4-4                                | IPI00000143 | 18 kDa  | 0   | 0   | 0   | 0   | 0   | 2   | 0   | 0   | 1   | 0.4226 | 0.4226 | -   | -    |
| KRTAP9-3 Keratin-associated protein 9-3                                | IPI00011222 | 17 kDa  | 0   | 0   | 0   | 0   | 0   | 5   | 0   | 0   | 3   | 0.4226 | 0.4226 | -   | -    |
| L1CAM Isoform 1 of Neural cell adhesion molecule L1 precursor          | IPI00027087 | 140 kDa | 36  | 50  | 51  | 31  | 21  | 24  | 43  | 41  | 22  | 0.2020 | 0.1012 | 0.5 | 0.5  |
| LAIR1 Isoform 2 of Leukocyte-associated immunoglobulin-like receptor 1 | IPI00028015 | 30 kDa  | 59  | 50  | 39  | 31  | 48  | 45  | 54  | 35  | 47  | 0.1178 | 0.2448 | 1.3 | 0.9  |
| LAMA5 Laminin subunit alpha-5 precursor                                | IPI00783665 | 400 kDa | 13  | 15  | 10  | 14  | 6   | 3   | 14  | 12  | 4   | 0.1073 | 0.0217 | 0.4 | 0.3  |
| LAMB1 Laminin subunit beta-1 precursor                                 | IPI00013976 | 198 kDa | 2   | 5   | 3   | 4   | 0   | 3   | 4   | 4   | 2   | 0.3471 | 0.4192 | 0.4 | 0.4  |
| LAMB2 Laminin subunit beta-2 precursor                                 | IPI00296922 | 196 kDa | 4   | 6   | 6   | 11  | 3   | 4   | 5   | 9   | 4   | 0.1866 | 0.5218 | 0.4 | 0.8  |
| LAMC1 Laminin subunit gamma-1 precursor                                | IPI00298281 | 178 kDa | 14  | 21  | 15  | 13  | 2   | 4   | 18  | 14  | 3   | 0.0129 | 0.0531 | 0.2 | 0.2  |
| LAMP1 lysosomal-associated membrane protein 1                          | IPI00004503 | 45 kDa  | 28  | 26  | 23  | 21  | 21  | 27  | 27  | 22  | 24  | 0.6218 | 0.4422 | 1.1 | 0.9  |
| LAMP2 Isoform LAMP-2A of Lysosome-associated membrane protein 2        | IPI00009030 | 45 kDa  | 60  | 45  | 43  | 39  | 63  | 50  | 52  | 41  | 57  | 0.1429 | 0.7121 | 1.4 | 1.1  |
| LAYN Isoform 2 of Layilin precursor                                    | IPI00744423 | 42 kDa  | 0   | 3   | 2   | 3   | 3   | 2   | 2   | 3   | 3   | 0.8963 | 0.5259 | 1.0 | 1.8  |
| LBP Lipopolysaccharide-binding protein precursor                       | IPI00032311 | 53 kDa  | 6   | 3   | 2   | 3   | 0   | 0   | 4   | 3   | 0   | 0.0340 | 0.0953 | 0.0 | 0.0  |
| LCAT Phosphatidylcholine-sterol acyltransferase precursor              | IPI00022331 | 50 kDa  | 12  | 7   | 15  | 12  | 8   | 5   | 9   | 14  | 7   | 0.0515 | 0.3950 | 0.5 | 0.7  |
| LCN1 Lipocalin-1 precursor                                             | IPI00009650 | 19 kDa  | 7   | 6   | 4   | 2   | 2   | 2   | 7   | 3   | 2   | 0.4612 | 0.0178 | 0.7 | 0.3  |
| LCN2 Neutrophil gelatinase-associated lipocalin precursor              | IPI00299547 | 23 kDa  | 20  | 13  | 53  | 74  | 13  | 12  | 17  | 63  | 13  | 0.0389 | 0.3812 | 0.2 | 0.7  |
| LCP1 Plastin-2                                                         | IPI00010471 | 70 kDa  | 1   | 0   | 3   | 3   | 0   | 0   | 1   | 3   | 0   | 0.0001 | 0.4226 | 0.0 | 0.0  |
| LDHA Isoform 1 of L-lactate dehydrogenase A chain                      | IPI00217966 | 37 kDa  | 12  | 13  | 11  | 12  | 0   | 12  | 12  | 0   | 0   | 0.0063 | 0.0016 | 0.0 | 0.0  |
| LDHB L-lactate dehydrogenase B chain                                   | IPI00219217 | 37 kDa  | 38  | 40  | 30  | 25  | 14  | 15  | 39  | 27  | 15  | 0.0353 | 0.0013 | 0.5 | 0.4  |
| LDLR Low-density lipoprotein receptor precursor                        | IPI00000070 | 95 kDa  | 5   | 3   | 1   | 3   | 0   | 2   | 4   | 2   | 1   | 0.5665 | 0.1811 | 0.5 | 0.3  |
| LEAP2 Liver-expressed antimicrobial peptide 2 precursor                | IPI00056309 | 9 kDa   | 13  | 16  | 10  | 7   | 15  | 23  | 15  | 8   | 19  | 0.1058 | 0.3719 | 2.3 | 1.3  |
| LGALS1 Galectin-1                                                      | IPI00219219 | 15 kDa  | 0   | 3   | 1   | 0   | 1   | 0   | 2   | 1   | 1   | 0.9809 | 0.6125 | 1.0 | 0.4  |
| LGALS3 Galectin-3                                                      | IPI00465431 | 26 kDa  | 12  | 11  | 11  | 6   | 0   | 1   | 11  | 8   | 1   | 0.0732 | 0.0044 | 0.1 | 0.0  |
| LGALS3BP Galectin-3-binding protein precursor                          | IPI00023673 | 65 kDa  | 315 | 317 | 243 | 283 | 196 | 190 | 316 | 263 | 193 | 0.0753 | 0.0006 | 0.7 | 0.6  |
| LGALS9 Isoform Long of Galectin-9                                      | IPI00010477 | 40 kDa  | 13  | 15  | 7   | 9   | 7   | 3   | 14  | 8   | 5   | 0.2170 | 0.0410 | 0.6 | 0.3  |
| LGMN Legumain precursor                                                | IPI00293303 | 49 kDa  | 5   | 2   | 1   | 2   | 3   | 2   | 3   | 2   | 3   | 0.2700 | 0.6994 | 1.7 | 0.8  |
| LIFR Leukemia inhibitory factor receptor precursor                     | IPI00444272 | 124 kDa | 2   | 5   | 6   | 8   | 1   | 5   | 4   | 7   | 3   | 0.2232 | 0.8695 | 0.4 | 0.9  |
| LILRA5 Isoform 1 of Leukocyte immunoglobulin-like receptor 5           | IPI00158145 | 33 kDa  | 13  | 10  | 15  | 10  | 0   | 0   | 12  | 13  | 0   | 0.0301 | 0.0184 | 0.0 | 0.0  |
| LILRB4 leukocyte immunoglobulin-like receptor, subfamily B             | IPI00289926 | 49 kDa  | 5   | 4   | 3   | 5   | 6   | 1   | 4   | 4   | 3   | 0.7494 | 0.6704 | 0.8 | 0.7  |
| LMAN2 Vesicular integral-membrane protein VIP36 precursor              | IPI00009950 | 40 kDa  | 168 | 130 | 216 | 173 | 92  | 89  | 149 | 194 | 91  | 0.0409 | 0.0922 | 0.5 | 0.6  |
| LMNA Isoform A of Lamin-A/C                                            | IPI00021405 | 74 kDa  | 0   | 0   | 0   | 2   | 0   | 1   | 0   | 1   | 1   | 0.7106 | 0.4226 | 0.5 | -    |
| LNPEP Isoform 2 of Leucyl-cystinyl aminopeptidase                      | IPI00221240 | 116 kDa | 1   | 11  | 7   | 9   | 1   | 10  | 6   | 8   | 5   | 0.5664 | 0.9221 | 0.6 | 0.9  |
| LOC100126583 cDNA FLJ41981 fis, clone SMINT2011888, h                  | IPI00784830 | 53 kDa  | 152 | 151 | 223 | 239 | 131 | 143 | 152 | 231 | 137 | 0.0107 | 0.1311 | 0.6 | 0.9  |
| LOC100134370 Keratin 83                                                | IPI00889599 | 54 kDa  | 0   | 0   | 0   | 0   | 0   | 129 | 0   | 0   | 64  | 0.4226 | 0.4226 | -   | -    |
| LOC124220 Uncharacterized protein UNQ773/PRO1567 precursor             | IPI00060800 | 23 kDa  | 36  | 34  | 40  | 48  | 22  | 19  | 35  | 44  | 21  | 0.0273 | 0.0132 | 0.5 | 0.6  |
| LOC130576 Isoform 2 of Ly6/PLAUR domain-containing protein 1           | IPI00217542 | 23 kDa  | 4   | 3   | 2   | 2   | 0   | 0   | 3   | 2   | 0   | 0.0001 | 0.0081 | 0.0 | 0.0  |
| LOC284422 Transmembrane protein HSPC323 precursor                      | IPI00024925 | 15 kDa  | 2   | 5   | 3   | 4   | 1   | 0   | 4   | 4   | 1   | 0.0512 | 0.1556 | 0.2 | 0.1  |
| LOC284889;MIF Macrophage migration inhibitory factor                   | IPI00293276 | 12 kDa  | 5   | 3   | 4   | 2   | 4   | 3   | 4   | 3   | 4   | 0.6472 | 0.9428 | 1.2 | 1.0  |
| LOC402665 Ig-like domain-containing protein ENSP000002                 | IPI00455667 | 37 kDa  | 1   | 1   | 0   | 2   | 2   | 1   | 1   | 1   | 2   | 0.6605 | 0.4467 | 1.6 | 1.5  |
| LOC442497;SLC3A2 4F2 cell-surface antigen heavy chain                  | IPI00027493 | 58 kDa  | 8   | 4   | 12  | 11  | 0   | 1   | 6   | 12  | 1   | 0.0025 | 0.1294 | 0.0 | 0.1  |
| LOC642103 similar to hCG1811191                                        | IPI00741768 | 170 kDa | 319 | 291 | 290 | 192 | 140 | 191 | 305 | 241 | 165 | 0.3077 | 0.0412 | 0.7 | 0.5  |

|                                                               |             |         |      |      |      |      |      |      |      |      |      |        |        |     |     |
|---------------------------------------------------------------|-------------|---------|------|------|------|------|------|------|------|------|------|--------|--------|-----|-----|
| LOC643635;ABHD6;CAPS calcyphosine isoform b                   | IPI00103067 | 27 kDa  | 6    | 1    | 0    | 0    | 0    | 0    | 3    | 0    | 0    | -      | 0.2964 | -   | 0.0 |
| LOC652113 Immunglobulin heavy chain variable region (Fr       | IPI00745363 | 14 kDa  | 16   | 25   | 16   | 38   | 25   | 21   | 20   | 27   | 23   | 0.7754 | 0.6045 | 0.9 | 1.2 |
| LOC653240 Uncharacterized protein ENSP00000375232             | IPI00871819 | 21 kDa  | 0    | 0    | 0    | 0    | 0    | 2    | 0    | 0    | 1    | 0.4226 | 0.4226 | -   | -   |
| LOC728285;LOC728934;KRTAP2-4;LOC644350;LOC730755; IPI00013265 |             | 13 kDa  | 0    | 0    | 0    | 0    | 0    | 5    | 0    | 0    | 3    | 0.4226 | 0.4226 | -   | -   |
| LOC728765;KRT39 Keratin, type I cytoskeletal 39               | IPI00741855 | 56 kDa  | 0    | 0    | 0    | 0    | 0    | 5    | 0    | 0    | 3    | 0.4226 | 0.4226 | -   | -   |
| LOC729968 Conserved hypothetical protein                      | IPI00884334 | 15 kDa  | 0    | 0    | 0    | 0    | 0    | 2    | 0    | 0    | 1    | 0.4226 | 0.4226 | -   | -   |
| LPA Apolipoprotein                                            | IPI00029168 | 501 kDa | 71   | 89   | 46   | 51   | 50   | 55   | 80   | 48   | 52   | 0.3915 | 0.1000 | 1.1 | 0.7 |
| LPHN1 Isoform 1 of Latrophilin-1 precursor                    | IPI00183445 | 163 kDa | 10   | 5    | 5    | 8    | 2    | 2    | 7    | 7    | 2    | 0.0908 | 0.1554 | 0.3 | 0.3 |
| LRG1 Leucine-rich alpha-2-glycoprotein precursor              | IPI00022417 | 38 kDa  | 132  | 123  | 70   | 84   | 239  | 240  | 127  | 77   | 240  | 0.0019 | 0.0016 | 3.1 | 1.9 |
| LRP1 Prolow-density lipoprotein receptor-related protein 1    | IPI00020557 | 505 kDa | 12   | 12   | 7    | 9    | 4    | 2    | 12   | 8    | 3    | 0.0747 | 0.0163 | 0.4 | 0.3 |
| LRP2 Low-density lipoprotein receptor-related protein 2 pr    | IPI00024292 | 522 kDa | 1694 | 1531 | 1411 | 1260 | 1064 | 1354 | 1613 | 1335 | 1209 | 0.5197 | 0.1358 | 0.9 | 0.7 |
| LRRC15 Leucine-rich repeat-containing protein 15 precurs      | IPI00152871 | 64 kDa  | 10   | 9    | 6    | 3    | 0    | 5    | 9    | 5    | 3    | 0.5812 | 0.1340 | 0.6 | 0.3 |
| LRRC19 Leucine-rich repeat-containing protein 19 precurs      | IPI00009653 | 42 kDa  | 0    | 5    | 1    | 0    | 2    | 0    | 3    | 1    | 1    | 0.6862 | 0.6593 | 2.1 | 0.4 |
| LRRN4 Uncharacterized protein C20orf75 precursor              | IPI00216345 | 79 kDa  | 11   | 8    | 1    | 4    | 0    | 0    | 9    | 3    | 0    | 0.2336 | 0.0214 | 0.0 | 0.0 |
| LSAMP Limbic system-associated membrane protein precu         | IPI00013303 | 37 kDa  | 0    | 1    | 1    | 7    | 0    | 0    | 1    | 4    | 0    | 0.3116 | 0.4226 | 0.0 | 0.0 |
| LTBP1 latent transforming growth factor beta binding prot     | IPI00302679 | 153 kDa | 2    | 7    | 5    | 5    | 8    | 10   | 5    | 5    | 9    | 0.0724 | 0.2523 | 1.7 | 1.8 |
| LTBP2 Latent-transforming growth factor beta-binding pro      | IPI00292150 | 195 kDa | 67   | 76   | 51   | 50   | 46   | 64   | 72   | 50   | 55   | 0.6354 | 0.2493 | 1.1 | 0.8 |
| LTBP4 Isoform 2 of Latent-transforming growth factor beta     | IPI00783492 | 166 kDa | 12   | 14   | 12   | 10   | 15   | 13   | 13   | 11   | 14   | 0.1570 | 0.5504 | 1.3 | 1.1 |
| LTF Lactotransferrin precursor                                | IPI00848342 | 78 kDa  | 18   | 24   | 271  | 195  | 85   | 62   | 21   | 233  | 73   | 0.0572 | 0.0457 | 0.3 | 3.5 |
| LUM Lumican precursor                                         | IPI00020986 | 38 kDa  | 17   | 15   | 33   | 37   | 42   | 47   | 16   | 35   | 45   | 0.1140 | 0.0098 | 1.3 | 2.8 |
| LY6D Lymphocyte antigen 6D precursor                          | IPI00029510 | 13 kDa  | 1    | 5    | 1    | 1    | 9    | 8    | 3    | 1    | 8    | 0.0081 | 0.1278 | 7.8 | 2.6 |
| LY6H Lymphocyte antigen 6H precursor                          | IPI00014964 | 17 kDa  | 6    | 8    | 4    | 10   | 7    | 6    | 7    | 7    | 7    | 0.8241 | 0.6826 | 0.9 | 0.9 |
| LYNX1 Ly-6 neurotoxin-like protein 1 isoform a                | IPI00218851 | 14 kDa  | 13   | 34   | 13   | 11   | 9    | 24   | 24   | 12   | 16   | 0.6320 | 0.6216 | 1.3 | 0.7 |
| LYPLA3 1-O-acylceramide synthase precursor                    | IPI00301459 | 47 kDa  | 8    | 5    | 7    | 11   | 0    | 2    | 7    | 9    | 1    | 0.0664 | 0.1073 | 0.1 | 0.2 |
| LYVE1 Lymphatic vessel endothelial hyaluronic acid recept     | IPI00290856 | 35 kDa  | 34   | 36   | 28   | 29   | 61   | 56   | 35   | 28   | 58   | 0.0067 | 0.0125 | 2.1 | 1.7 |
| LYZ Lysozyme C precursor                                      | IPI00019038 | 17 kDa  | 13   | 15   | 15   | 22   | 11   | 11   | 14   | 18   | 11   | 0.1654 | 0.0720 | 0.6 | 0.8 |
| MADCAM1 Isoform 1 of Mucosal addressin cell adhesion r        | IPI00289931 | 43 kDa  | 19   | 16   | 15   | 16   | 18   | 15   | 18   | 15   | 16   | 0.4834 | 0.5970 | 1.1 | 0.9 |
| MAN1A1 MAN1A1 protein                                         | IPI00439446 | 75 kDa  | 22   | 21   | 18   | 20   | 3    | 5    | 21   | 19   | 4    | 0.0083 | 0.0040 | 0.2 | 0.2 |
| MAN1C1 Mannosyl-oligosaccharide 1,2-alpha-mannosidas          | IPI00745251 | 71 kDa  | 0    | 3    | 0    | 2    | 0    | 0    | 2    | 1    | 0    | 0.4226 | 0.4226 | 0.0 | 0.0 |
| MAN2A1 Alpha-mannosidase 2                                    | IPI00003802 | 131 kDa | 24   | 27   | 18   | 16   | 1    | 1    | 25   | 17   | 1    | 0.0062 | 0.0038 | 0.1 | 0.0 |
| MAN2A2 Isoform Long of Alpha-mannosidase IIx                  | IPI00027703 | 129 kDa | 4    | 2    | 2    | 5    | 0    | 0    | 3    | 4    | 0    | 0.1399 | 0.0727 | 0.0 | 0.0 |
| MAN2B1 Lysosomal alpha-mannosidase precursor                  | IPI00012989 | 114 kDa | 5    | 5    | 0    | 0    | 1    | 0    | 5    | 0    | 1    | 0.4226 | 0.0162 | -   | 0.1 |
| MAN2B2 Isoform 1 of Epididymis-specific alpha-mannosid        | IPI00328488 | 114 kDa | 30   | 21   | 20   | 8    | 12   | 9    | 25   | 14   | 10   | 0.5961 | 0.0881 | 0.7 | 0.4 |
| MANBA Beta-mannosidase precursor                              | IPI00298793 | 101 kDa | 42   | 57   | 30   | 33   | 35   | 41   | 49   | 31   | 38   | 0.1822 | 0.2886 | 1.2 | 0.8 |
| MARCKS Myristoylated alanine-rich C-kinase substrate          | IPI00219301 | 32 kDa  | 0    | 2    | 1    | 0    | 0    | 2    | 1    | 1    | 1    | 0.6940 | 0.9646 | 2.0 | 1.1 |
| MASP2 Isoform 1 of Mannan-binding lectin serine proteas       | IPI00294713 | 76 kDa  | 177  | 161  | 215  | 211  | 39   | 55   | 169  | 213  | 47   | 0.0025 | 0.0088 | 0.2 | 0.3 |
| MATN4 matrilin 4 isoform 3 precursor                          | IPI00012325 | 55 kDa  | 0    | 3    | 2    | 2    | 0    | 0    | 2    | 2    | 0    | 0.0001 | 0.4226 | 0.0 | 0.0 |
| MCAM Isoform 1 of Cell surface glycoprotein MUC18 prec        | IPI00016334 | 72 kDa  | 28   | 27   | 49   | 51   | 33   | 19   | 27   | 50   | 26   | 0.0765 | 0.8849 | 0.5 | 1.0 |
| MDH1 Malate dehydrogenase, cytoplasmic                        | IPI00291005 | 36 kDa  | 10   | 6    | 8    | 8    | 2    | 0    | 8    | 8    | 1    | 0.0223 | 0.0863 | 0.1 | 0.1 |
| MDH2 Malate dehydrogenase, mitochondrial precursor            | IPI00291006 | 36 kDa  | 1    | 3    | 0    | 3    | 0    | 0    | 2    | 2    | 0    | 0.4226 | 0.1450 | 0.0 | 0.0 |
| MEGF8 multiple EGF-like-domains 8                             | IPI00607580 | 296 kDa | 85   | 82   | 89   | 82   | 17   | 34   | 84   | 85   | 25   | 0.0248 | 0.0234 | 0.3 | 0.3 |
| MEGF9 Multiple epidermal growth factor-like domains 9 pl      | IPI00401283 | 63 kDa  | 6    | 16   | 5    | 5    | 8    | 14   | 11   | 5    | 11   | 0.2156 | 0.9798 | 2.1 | 1.0 |
| MFI2 Isoform 1 of Melanotransferrin precursor                 | IPI00029275 | 80 kDa  | 24   | 34   | 46   | 42   | 15   | 8    | 29   | 44   | 11   | 0.0165 | 0.1108 | 0.3 | 0.4 |
| MGAM Maltase-glucoamylase, intestinal                         | IPI00220143 | 210 kDa | 435  | 410  | 352  | 233  | 217  | 305  | 423  | 292  | 261  | 0.7118 | 0.0717 | 0.9 | 0.6 |
| MGAT5 Alpha-1,6-mannosylglycoprotein 6-beta-N-acetylgl        | IPI00020407 | 85 kDa  | 4    | 5    | 2    | 1    | 0    | 0    | 4    | 2    | 0    | 0.1004 | 0.0256 | 0.0 | 0.0 |
| MGC45438 hypothetical protein LOC146556 isoform 2             | IPI00166766 | 45 kDa  | 11   | 8    | 2    | 2    | 10   | 4    | 9    | 2    | 7    | 0.2163 | 0.5397 | 3.4 | 0.8 |
| MIA2 melanoma inhibitory activity 2                           | IPI00044351 | 74 kDa  | 2    | 4    | 3    | 0    | 0    | 0    | 3    | 2    | 0    | 0.4226 | 0.0574 | 0.0 | 0.0 |

|                                                                 |             |          |     |     |     |     |    |    |     |     |    |        |        |     |      |
|-----------------------------------------------------------------|-------------|----------|-----|-----|-----|-----|----|----|-----|-----|----|--------|--------|-----|------|
| MI A3 Isoform 1 of Melanoma inhibitory activity protein 3 f     | IPI00455473 | 214 kDa  | 1   | 2   | 2   | 3   | 1  | 1  | 2   | 3   | 1  | 0.0909 | 0.3292 | 0.4 | 0.7  |
| MINPP1 Isoform 1 of Multiple inositol polyphosphate phosphatase | IPI00293748 | 55 kDa   | 0   | 3   | 7   | 7   | 0  | 0  | 2   | 7   | 0  | 0.0001 | 0.4226 | 0.0 | 0.0  |
| MME Neprilysin                                                  | IPI00247063 | 86 kDa   | 73  | 79  | 62  | 66  | 43 | 47 | 76  | 64  | 45 | 0.0214 | 0.0135 | 0.7 | 0.6  |
| MMP7 Matrilysin precursor                                       | IPI00013400 | 30 kDa   | 4   | 1   | 7   | 5   | 2  | 3  | 2   | 6   | 3  | 0.1002 | 0.7956 | 0.4 | 1.2  |
| MMP9 Matrix metalloproteinase-9 precursor                       | IPI00027509 | 78 kDa   | 1   | 5   | 15  | 14  | 2  | 2  | 3   | 15  | 2  | 0.0002 | 0.6744 | 0.1 | 0.7  |
| MMRN1 Multimerin-1 precursor                                    | IPI00012269 | 138 kDa  | 7   | 3   | 6   | 3   | 0  | 1  | 5   | 5   | 1  | 0.1338 | 0.1697 | 0.1 | 0.1  |
| MMRN2 Multimerin-2 precursor                                    | IPI00015525 | 104 kDa  | 19  | 17  | 21  | 23  | 9  | 10 | 18  | 22  | 9  | 0.0050 | 0.0171 | 0.4 | 0.5  |
| MOBK1B Isoform 1 of Mps one binder kinase activator-like        | IPI00301518 | 25 kDa   | 2   | 0   | 0   | 0   | 0  | 0  | 1   | 0   | 0  | -      | 0.4226 | -   | 0.0  |
| MOC52 Molybdenum cofactor synthesis protein 2 small subunit     | IPI00002968 | 10 kDa   | 2   | 5   | 1   | 1   | 2  | 4  | 4   | 1   | 3  | 0.1703 | 0.8121 | 3.1 | 0.9  |
| MPO Isoform H17 of Myeloperoxidase precursor                    | IPI00007244 | 84 kDa   | 0   | 0   | 13  | 20  | 0  | 0  | 0   | 16  | 0  | 0.0433 | -      | 0.0 | -    |
| MRC2 Macrophage mannose receptor 2 precursor                    | IPI00005707 | 167 kDa  | 1   | 7   | 1   | 2   | 1  | 2  | 4   | 2   | 2  | 0.9429 | 0.4893 | 1.0 | 0.4  |
| MSLN Isoform 2 of Mesothelin precursor                          | IPI00025110 | 68 kDa   | 10  | 6   | 16  | 14  | 9  | 11 | 8   | 15  | 10 | 0.0450 | 0.4354 | 0.6 | 1.3  |
| MSMB Isoform PSP94 of Beta-microseminoprotein precursor         | IPI00414609 | 13 kDa   | 10  | 20  | 10  | 8   | 14 | 8  | 15  | 9   | 11 | 0.6204 | 0.5955 | 1.2 | 0.7  |
| MSN Moesin                                                      | IPI00219365 | 68 kDa   | 64  | 63  | 68  | 49  | 65 | 45 | 63  | 58  | 55 | 0.8372 | 0.4921 | 0.9 | 0.9  |
| MST1 Hepatocyte growth factor-like protein precursor            | IPI00292218 | 80 kDa   | 5   | 1   | 2   | 1   | 1  | 1  | 3   | 2   | 1  | 0.4612 | 0.4407 | 0.7 | 0.4  |
| MTHFD1 C-1-tetrahydrofolate synthase, cytoplasmic               | IPI00218342 | 102 kDa  | 0   | 2   | 0   | 2   | 0  | 0  | 1   | 1   | 0  | 0.4226 | 0.4226 | 0.0 | 0.0  |
| MUC1 Isoform 1 of Mucin-1 precursor                             | IPI00013955 | 122 kDa  | 76  | 60  | 54  | 59  | 61 | 71 | 68  | 57  | 66 | 0.2512 | 0.8439 | 1.2 | 1.0  |
| MUC16 Mucin-16                                                  | IPI00103552 | 2353 kDa | 0   | 0   | 3   | 2   | 0  | 0  | 0   | 3   | 0  | 0.0417 | -      | 0.0 | -    |
| MUC20 Isoform 2 of Mucin-20 precursor                           | IPI00166450 | 57 kDa   | 29  | 38  | 34  | 38  | 40 | 49 | 33  | 36  | 44 | 0.2577 | 0.2401 | 1.2 | 1.3  |
| MUC4 Isoform 1 of Mucin-4 precursor                             | IPI00302162 | 232 kDa  | 1   | 2   | 13  | 16  | 2  | 1  | 2   | 14  | 2  | 0.0145 | 0.9616 | 0.1 | 1.0  |
| MUC5AC Mucin-5AC precursor (Fragment)                           | IPI00103397 | 527 kDa  | 1   | 3   | 7   | 8   | 8  | 9  | 2   | 8   | 8  | 0.6791 | 0.0265 | 1.0 | 3.9  |
| MUC5B mucin 5, subtype B, tracheobronchial                      | IPI00855918 | 597 kDa  | 6   | 7   | 19  | 23  | 67 | 64 | 6   | 21  | 66 | 0.0026 | 0.0006 | 3.1 | 10.1 |
| MUC6 mucin 6, gastric                                           | IPI00401776 | 257 kDa  | 18  | 14  | 48  | 53  | 36 | 30 | 16  | 50  | 33 | 0.0521 | 0.0435 | 0.7 | 2.1  |
| MUPCDH Isoform 3 of Mucin and cadherin-like protein precursor   | IPI00180687 | 53 kDa   | 7   | 16  | 15  | 14  | 7  | 4  | 12  | 15  | 5  | 0.0156 | 0.3093 | 0.4 | 0.5  |
| MVP Major vault protein                                         | IPI00000105 | 99 kDa   | 4   | 8   | 0   | 1   | 0  | 0  | 6   | 1   | 0  | 0.4226 | 0.1190 | 0.0 | 0.0  |
| MXRA5 Matrix-remodeling-associated protein 5 precursor          | IPI00012347 | 312 kDa  | 4   | 6   | 0   | 1   | 0  | 0  | 5   | 1   | 0  | 0.4226 | 0.0574 | 0.0 | 0.0  |
| MXRA8 Isoform 2 of Matrix-remodeling-associated protein         | IPI00153049 | 50 kDa   | 65  | 47  | 79  | 68  | 10 | 6  | 56  | 74  | 8  | 0.0077 | 0.0341 | 0.1 | 0.1  |
| MYH9 Myosin-9                                                   | IPI00019502 | 227 kDa  | 16  | 13  | 2   | 2   | 1  | 3  | 14  | 2   | 2  | 0.9560 | 0.0185 | 1.0 | 0.2  |
| MYL6;MYL6B Isoform Non-muscle of Myosin light polypeptide chain | IPI00335168 | 17 kDa   | 5   | 7   | 5   | 4   | 1  | 2  | 6   | 5   | 2  | 0.0579 | 0.0727 | 0.3 | 0.3  |
| MYL9 myosin regulatory light chain 9 isoform b                  | IPI00030929 | 14 kDa   | 0   | 0   | 0   | 4   | 0  | 0  | 0   | 2   | 0  | 0.4226 | -      | 0.0 | -    |
| MYLK Isoform 2 of Myosin light chain kinase, smooth muscle      | IPI00221255 | 203 kDa  | 4   | 5   | 5   | 4   | 2  | 2  | 4   | 5   | 2  | 0.0478 | 0.0940 | 0.5 | 0.5  |
| MYO1C myosin IC isoform a                                       | IPI00743335 | 122 kDa  | 14  | 21  | 7   | 21  | 33 | 27 | 18  | 14  | 30 | 0.1628 | 0.1139 | 2.1 | 1.7  |
| MYO1D Isoform 1 of Myosin-Id                                    | IPI00329719 | 116 kDa  | 6   | 4   | 6   | 0   | 2  | 11 | 5   | 3   | 6  | 0.5992 | 0.7692 | 2.0 | 1.3  |
| NAGA Alpha-N-acetylgalactosaminidase precursor                  | IPI00414909 | 47 kDa   | 17  | 21  | 5   | 5   | 8  | 8  | 19  | 5   | 8  | 0.0022 | 0.0332 | 1.5 | 0.4  |
| NAGLU Alpha-N-acetylglucosaminidase precursor                   | IPI00008787 | 82 kDa   | 104 | 113 | 133 | 118 | 40 | 40 | 109 | 126 | 40 | 0.0079 | 0.0039 | 0.3 | 0.4  |
| NAPSA Napsin-A precursor                                        | IPI00014055 | 45 kDa   | 18  | 13  | 16  | 13  | 15 | 12 | 15  | 15  | 14 | 0.6718 | 0.6019 | 0.9 | 0.9  |
| NBL1 Neuroblastoma, suppression of tumorigenicity 1             | IPI00013299 | 19 kDa   | 0   | 3   | 1   | 1   | 1  | 2  | 2   | 1   | 2  | 0.3856 | 0.9451 | 1.6 | 1.1  |
| NCAM1 Isoform N-CAM 120 of Neural cell adhesion molecule        | IPI00220737 | 84 kDa   | 14  | 17  | 18  | 12  | 26 | 18 | 16  | 15  | 22 | 0.2866 | 0.2615 | 1.5 | 1.4  |
| NCAM2 Neural cell adhesion molecule 2 precursor                 | IPI00376427 | 93 kDa   | 1   | 1   | 0   | 2   | 0  | 0  | 1   | 1   | 0  | 0.4226 | 0.0081 | 0.0 | 0.0  |
| NCKAP1 Nck-associated protein 1                                 | IPI00031982 | 129 kDa  | 0   | 2   | 0   | 3   | 1  | 3  | 1   | 2   | 2  | 0.7773 | 0.5094 | 1.4 | 2.2  |
| NCSTN Isoform 1 of Nicastrin precursor                          | IPI00021983 | 78 kDa   | 4   | 4   | 1   | 1   | 1  | 2  | 4   | 1   | 2  | 0.3856 | 0.0605 | 1.6 | 0.4  |
| NEGR1 Neuronal growth regulator 1 precursor                     | IPI00176221 | 39 kDa   | 34  | 23  | 20  | 32  | 32 | 35 | 28  | 26  | 34 | 0.3494 | 0.4360 | 1.3 | 1.2  |
| NEO1 Isoform 1 of Neogenin precursor                            | IPI00023814 | 160 kDa  | 7   | 15  | 13  | 14  | 14 | 2  | 11  | 14  | 8  | 0.4739 | 0.7294 | 0.6 | 0.7  |
| NEU1 Sialidase-1 precursor                                      | IPI00029817 | 45 kDa   | 28  | 25  | 35  | 17  | 7  | 5  | 26  | 26  | 6  | 0.1650 | 0.0049 | 0.2 | 0.2  |
| NGFR Tumor necrosis factor receptor superfamily member 1        | IPI00027436 | 45 kDa   | 24  | 21  | 21  | 21  | 23 | 27 | 22  | 21  | 25 | 0.1654 | 0.4077 | 1.2 | 1.1  |
| NHLRC3 NHL repeat-containing protein 3 precursor                | IPI00552937 | 38 kDa   | 20  | 9   | 11  | 5   | 15 | 9  | 15  | 8   | 12 | 0.4444 | 0.7239 | 1.5 | 0.8  |
| NID1 Isoform 1 of Nidogen-1 precursor                           | IPI00026944 | 136 kDa  | 56  | 48  | 47  | 52  | 41 | 23 | 52  | 49  | 32 | 0.2042 | 0.1762 | 0.6 | 0.6  |

|                                                             |             |         |     |     |     |     |     |     |     |     |     |        |        |     |     |
|-------------------------------------------------------------|-------------|---------|-----|-----|-----|-----|-----|-----|-----|-----|-----|--------|--------|-----|-----|
| NME2 Nucleoside diphosphate kinase                          | IPI00604590 | 33 kDa  | 8   | 7   | 5   | 5   | 2   | 0   | 8   | 5   | 1   | 0.0642 | 0.0368 | 0.2 | 0.1 |
| NOMO1;NOMO3 Nodal modulator 1 precursor                     | IPI00329352 | 134 kDa | 5   | 7   | 3   | 4   | 0   | 0   | 6   | 4   | 0   | 0.0169 | 0.0332 | 0.0 | 0.0 |
| NOV Protein NOV homolog precursor                           | IPI00011140 | 39 kDa  | 16  | 19  | 12  | 19  | 9   | 12  | 17  | 15  | 10  | 0.3313 | 0.0916 | 0.7 | 0.6 |
| NP CDNA FLJ25678 fis, clone TST04067, highly similar to PU  | IPI00017672 | 33 kDa  | 2   | 2   | 2   | 2   | 0   | 0   | 2   | 2   | 0   | 0.0001 | 0.0081 | 0.0 | 0.0 |
| NPC2 Epididymal secretory protein E1 precursor              | IPI00301579 | 17 kDa  | 61  | 60  | 30  | 41  | 47  | 35  | 61  | 36  | 41  | 0.5573 | 0.0846 | 1.2 | 0.7 |
| NPR3 Isoform 1 of Atrial natriuretic peptide clearance rece | IPI00013826 | 60 kDa  | 1   | 0   | 1   | 2   | 0   | 0   | 1   | 2   | 0   | 0.0905 | 0.4226 | 0.0 | 0.0 |
| NQO2 Ribosylidihyronicotinamide dehydrogenase               | IPI00219129 | 26 kDa  | 0   | 0   | 3   | 4   | 0   | 0   | 0   | 4   | 0   | 0.0169 | -      | 0.0 | -   |
| NRAS GTPase NRas precursor                                  | IPI00000005 | 21 kDa  | 1   | 2   | 0   | 1   | 0   | 0   | 2   | 1   | 0   | 0.4226 | 0.0574 | 0.0 | 0.0 |
| NRCAM Isoform 1 of Neuronal cell adhesion molecule prec     | IPI00333776 | 144 kDa | 8   | 8   | 3   | 6   | 4   | 4   | 8   | 5   | 4   | 0.8406 | 0.0028 | 0.9 | 0.5 |
| NT5C Isoform 1 of 5'(3')-deoxyribonucleotidase, cytosolic t | IPI00005573 | 23 kDa  | 0   | 0   | 0   | 3   | 0   | 0   | 0   | 2   | 0   | 0.4226 | -      | 0.0 | -   |
| NUCB1 Nucleobindin-1 precursor                              | IPI00295542 | 54 kDa  | 13  | 10  | 22  | 21  | 0   | 1   | 12  | 21  | 1   | 0.0020 | 0.0224 | 0.0 | 0.0 |
| NUCB2 Nucleobindin-2 precursor                              | IPI00009123 | 50 kDa  | 1   | 0   | 3   | 0   | 0   | 0   | 1   | 2   | 0   | 0.4226 | 0.4226 | 0.0 | 0.0 |
| NUDT1 Isoform p26 of 7,8-dihydro-8-oxoguanine triphosph     | IPI00004392 | 23 kDa  | 10  | 9   | 5   | 8   | 6   | 4   | 9   | 7   | 5   | 0.3614 | 0.0226 | 0.7 | 0.5 |
| NUTF2 Nuclear transport factor 2                            | IPI00009901 | 14 kDa  | 12  | 10  | 19  | 16  | 7   | 5   | 11  | 17  | 6   | 0.0263 | 0.0505 | 0.3 | 0.5 |
| OAF Out at first protein homolog precursor                  | IPI00328703 | 31 kDa  | 2   | 1   | 2   | 1   | 0   | 1   | 2   | 2   | 1   | 0.3058 | 0.3180 | 0.3 | 0.3 |
| ODZ4 Tenascin-4                                             | IPI00737429 | 308 kDa | 4   | 9   | 10  | 11  | 0   | 0   | 6   | 10  | 0   | 0.0078 | 0.1450 | 0.0 | 0.0 |
| OIT3 Isoform 1 of Oncoprotein-induced transcript 3 protei   | IPI00328215 | 60 kDa  | 0   | 2   | 0   | 0   | 4   | 1   | 1   | 0   | 3   | 0.2417 | 0.4652 | -   | 2.7 |
| OLFM4 Olfactomedin-4 precursor                              | IPI00022255 | 57 kDa  | 25  | 25  | 119 | 94  | 21  | 16  | 25  | 106 | 19  | 0.0194 | 0.1114 | 0.2 | 0.7 |
| OLR1 Oxidized low-density lipoprotein receptor 1            | IPI00001759 | 31 kDa  | 8   | 6   | 8   | 4   | 1   | 0   | 7   | 6   | 1   | 0.1234 | 0.0371 | 0.1 | 0.1 |
| OPCML Opioid-binding protein/cell adhesion molecule pre     | IPI00001662 | 38 kDa  | 8   | 9   | 8   | 8   | 13  | 6   | 9   | 8   | 10  | 0.7108 | 0.7717 | 1.2 | 1.1 |
| ORM1 orosomucoid 1 precursor                                | IPI00884926 | 24 kDa  | 180 | 196 | 115 | 121 | 333 | 392 | 188 | 118 | 363 | 0.0141 | 0.0288 | 3.1 | 1.9 |
| ORM2 Alpha-1-acid glycoprotein 2 precursor                  | IPI00020091 | 24 kDa  | 141 | 116 | 94  | 104 | 226 | 287 | 129 | 99  | 256 | 0.0365 | 0.0613 | 2.6 | 2.0 |
| OSCAR Isoform 6 of Osteoclast associated immunoglobulin     | IPI00107731 | 28 kDa  | 35  | 31  | 24  | 23  | 35  | 35  | 33  | 24  | 35  | 0.0046 | 0.3267 | 1.5 | 1.1 |
| P4HB Protein disulfide-isomerase precursor                  | IPI00010796 | 57 kDa  | 5   | 8   | 8   | 5   | 0   | 0   | 6   | 7   | 0   | 0.0536 | 0.0574 | 0.0 | 0.0 |
| P76 Putative phospholipase B-like 2 precursor               | IPI00169285 | 65 kDa  | 31  | 31  | 15  | 11  | 24  | 13  | 31  | 13  | 19  | 0.4552 | 0.1572 | 1.4 | 0.6 |
| PAM peptidylglycine alpha-amidating monooxygenase isof      | IPI00177543 | 108 kDa | 1   | 4   | 0   | 0   | 0   | 0   | 3   | 0   | 0   | -      | 0.2046 | -   | 0.0 |
| PAPPA2 Isoform 1 of Pappalysin-2 precursor                  | IPI00013569 | 199 kDa | 138 | 133 | 118 | 94  | 67  | 93  | 135 | 106 | 80  | 0.2821 | 0.0539 | 0.8 | 0.6 |
| PARK7 Protein DJ-1                                          | IPI00298547 | 20 kDa  | 11  | 8   | 8   | 8   | 3   | 1   | 9   | 8   | 2   | 0.0311 | 0.0562 | 0.3 | 0.2 |
| PCBP1 Poly(rC)-binding protein 1                            | IPI00016610 | 37 kDa  | 4   | 4   | 2   | 3   | 1   | 1   | 4   | 3   | 1   | 0.0909 | 0.0055 | 0.4 | 0.3 |
| PCDH1 Isoform 1 of Protocadherin-1 precursor                | IPI00000024 | 111 kDa | 37  | 34  | 32  | 36  | 22  | 20  | 36  | 34  | 21  | 0.0327 | 0.0149 | 0.6 | 0.6 |
| PCDH12 PCDH12 protein                                       | IPI00009851 | 129 kDa | 8   | 9   | 5   | 11  | 4   | 2   | 9   | 8   | 3   | 0.2591 | 0.0433 | 0.4 | 0.4 |
| PCDH19 Isoform 2 of Protocadherin-19 precursor              | IPI00290350 | 121 kDa | 0   | 0   | 3   | 5   | 0   | 0   | 0   | 4   | 0   | 0.0528 | -      | 0.0 | -   |
| PCDH24 Protocadherin-24 precursor                           | IPI00307446 | 142 kDa | 78  | 76  | 64  | 46  | 96  | 114 | 77  | 55  | 105 | 0.0588 | 0.0923 | 1.9 | 1.4 |
| PCDH9 Protocadherin-9 precursor                             | IPI00006967 | 132 kDa | 6   | 8   | 2   | 5   | 4   | 5   | 7   | 4   | 5   | 0.5212 | 0.1980 | 1.3 | 0.7 |
| PCDHA10 Isoform 1 of Protocadherin alpha-10 precursor       | IPI00001513 | 103 kDa | 0   | 4   | 3   | 3   | 0   | 0   | 2   | 3   | 0   | 0.0001 | 0.4226 | 0.0 | 0.0 |
| PCDHGC3;PCDHGA12 Isoform 1 of Protocadherin gamma-C         | IPI00001872 | 101 kDa | 17  | 22  | 17  | 14  | 9   | 5   | 19  | 16  | 7   | 0.0548 | 0.0587 | 0.5 | 0.4 |
| PCOLCE Procollagen C-endopeptidase enhancer 1 precurs       | IPI00299738 | 48 kDa  | 24  | 17  | 12  | 16  | 15  | 18  | 20  | 14  | 17  | 0.3107 | 0.4336 | 1.2 | 0.8 |
| PCOLCE2 Procollagen C-endopeptidase enhancer 2 precurs      | IPI00002543 | 46 kDa  | 1   | 3   | 3   | 1   | 1   | 0   | 2   | 2   | 1   | 0.3254 | 0.2798 | 0.3 | 0.3 |
| PCSK1N ProSAAS precursor                                    | IPI00002280 | 27 kDa  | 7   | 4   | 3   | 4   | 1   | 2   | 6   | 4   | 2   | 0.1036 | 0.1418 | 0.4 | 0.3 |
| PDCD1LG2 Isoform 1 of Programmed cell death 1 ligand 2      | IPI00414542 | 31 kDa  | 13  | 8   | 7   | 16  | 10  | 14  | 11  | 11  | 12  | 0.9288 | 0.7244 | 1.0 | 1.1 |
| PDCD6 Programmed cell death protein 6                       | IPI00025277 | 22 kDa  | 12  | 7   | 5   | 9   | 1   | 2   | 9   | 7   | 2   | 0.1118 | 0.0908 | 0.2 | 0.2 |
| PDCD6IP Dopamine receptor interacting protein 4             | IPI00871576 | 97 kDa  | 72  | 82  | 61  | 57  | 65  | 61  | 77  | 59  | 63  | 0.3152 | 0.1220 | 1.1 | 0.8 |
| PDGFRB Beta-type platelet-derived growth factor receptor    | IPI00015902 | 124 kDa | 12  | 9   | 18  | 10  | 11  | 13  | 10  | 14  | 12  | 0.6275 | 0.4985 | 0.8 | 1.1 |
| PDXK Isoform 1 of Pyridoxal kinase                          | IPI00013004 | 35 kDa  | 2   | 0   | 2   | 1   | 0   | 0   | 1   | 2   | 0   | 0.1004 | 0.4226 | 0.0 | 0.0 |
| PDZK1 PDZ domain-containing protein 1                       | IPI00298067 | 57 kDa  | 1   | 1   | 3   | 4   | 0   | 0   | 1   | 4   | 0   | 0.0169 | 0.0081 | 0.0 | 0.0 |
| PDZK1IP1 PDZK1-interacting protein 1                        | IPI00011858 | 12 kDa  | 1   | 3   | 5   | 7   | 1   | 0   | 2   | 6   | 1   | 0.0363 | 0.2798 | 0.1 | 0.3 |
| PEBP1 Phosphatidylethanolamine-binding protein 1            | IPI00219446 | 21 kDa  | 30  | 21  | 29  | 31  | 11  | 9   | 25  | 30  | 10  | 0.0073 | 0.0776 | 0.3 | 0.4 |

|                                                                  |             |         |     |     |     |     |     |     |     |     |     |        |        |     |     |
|------------------------------------------------------------------|-------------|---------|-----|-----|-----|-----|-----|-----|-----|-----|-----|--------|--------|-----|-----|
| PEBP4 Phosphatidylethanolamine-binding protein 4 precursor       | IPI00163563 | 26 kDa  | 8   | 10  | 5   | 4   | 0   | 0   | 9   | 5   | 0   | 0.0146 | 0.0075 | 0.0 | 0.0 |
| PEPD Xaa-Pro dipeptidase                                         | IPI00257882 | 55 kDa  | 1   | 2   | 1   | 0   | 0   | 0   | 2   | 1   | 0   | 0.4226 | 0.0574 | 0.0 | 0.0 |
| PFN1 Profilin-1                                                  | IPI00216691 | 15 kDa  | 12  | 12  | 17  | 19  | 12  | 6   | 12  | 18  | 9   | 0.1022 | 0.4377 | 0.5 | 0.8 |
| PFN2 Isoform IIb of Profilin-2                                   | IPI00107555 | 15 kDa  | 1   | 1   | 1   | 2   | 1   | 1   | 1   | 2   | 1   | 0.4446 | 0.9116 | 0.7 | 1.0 |
| PGA5;PGA3;PGA4 pepsinogen 3, group I                             | IPI00736755 | 42 kDa  | 119 | 102 | 75  | 71  | 134 | 145 | 110 | 73  | 140 | 0.0072 | 0.0983 | 1.9 | 1.3 |
| PGC Gastric precusor                                             | IPI00022213 | 42 kDa  | 1   | 1   | 3   | 3   | 6   | 6   | 1   | 3   | 6   | 0.0266 | 0.0096 | 1.9 | 5.4 |
| PGCP 60 kDa protein                                              | IPI00005794 | 60 kDa  | 16  | 25  | 12  | 21  | 21  | 20  | 20  | 16  | 21  | 0.4280 | 0.9464 | 1.3 | 1.0 |
| PGD 6-phosphogluconate dehydrogenase, decarboxylating            | IPI00219525 | 53 kDa  | 2   | 2   | 0   | 4   | 0   | 0   | 2   | 2   | 0   | 0.4226 | 0.0081 | 0.0 | 0.0 |
| PGK1 Phosphoglycerate kinase 1                                   | IPI00169383 | 45 kDa  | 26  | 24  | 16  | 12  | 3   | 4   | 25  | 14  | 4   | 0.0289 | 0.0036 | 0.3 | 0.2 |
| PGLS 6-phosphogluconolactonase                                   | IPI00029997 | 28 kDa  | 20  | 13  | 22  | 18  | 6   | 4   | 17  | 20  | 5   | 0.0245 | 0.0876 | 0.2 | 0.3 |
| PGLYRP1 Peptidoglycan recognition protein precursor              | IPI00021085 | 22 kDa  | 47  | 33  | 53  | 69  | 33  | 40  | 40  | 61  | 36  | 0.1077 | 0.6911 | 0.6 | 0.9 |
| PGLYRP2 Isoform 1 of N-acetylmuramoyl-L-alanine amidase          | IPI00163207 | 62 kDa  | 24  | 26  | 43  | 38  | 13  | 4   | 25  | 41  | 9   | 0.0246 | 0.0708 | 0.2 | 0.4 |
| PGM1 Isoform 1 of Phosphoglucomutase-1                           | IPI00219526 | 61 kDa  | 5   | 3   | 0   | 4   | 0   | 1   | 4   | 2   | 1   | 0.5478 | 0.0847 | 0.3 | 0.1 |
| PHPT1 14 kDa phosphohistidine phosphatase                        | IPI00299977 | 14 kDa  | 2   | 8   | 5   | 9   | 3   | 1   | 5   | 7   | 2   | 0.1559 | 0.4230 | 0.3 | 0.4 |
| PI16 Isoform 1 of Peptidase inhibitor 16 precursor               | IPI00301143 | 49 kDa  | 66  | 83  | 76  | 65  | 163 | 141 | 74  | 71  | 152 | 0.0226 | 0.0313 | 2.1 | 2.0 |
| PI3 Elafin precursor                                             | IPI00021434 | 12 kDa  | 5   | 7   | 11  | 5   | 8   | 9   | 6   | 8   | 8   | 0.9326 | 0.1990 | 1.0 | 1.4 |
| PIGR Polymeric immunoglobulin receptor precursor                 | IPI00004573 | 83 kDa  | 263 | 287 | 439 | 401 | 342 | 272 | 275 | 420 | 307 | 0.1068 | 0.4806 | 0.7 | 1.1 |
| PIK3IP1 Isoform 1 of Phosphoinositide-3-kinase-interacting       | IPI00298388 | 28 kDa  | 67  | 48  | 66  | 43  | 83  | 54  | 58  | 55  | 68  | 0.5346 | 0.6050 | 1.2 | 1.2 |
| PIP Prolactin-inducible protein precursor                        | IPI00022974 | 17 kDa  | 25  | 21  | 54  | 36  | 19  | 14  | 23  | 45  | 16  | 0.0887 | 0.1661 | 0.4 | 0.7 |
| PKD1 Isoform 3 of Polycystin-1 precursor                         | IPI00028786 | 462 kDa | 4   | 12  | 1   | 4   | 2   | 2   | 8   | 3   | 2   | 0.8081 | 0.3125 | 0.8 | 0.3 |
| PKHD1 Isoform 1 of Fibrocystin precursor                         | IPI00293274 | 447 kDa | 1   | 5   | 3   | 0   | 0   | 1   | 3   | 2   | 1   | 0.5946 | 0.3239 | 0.3 | 0.2 |
| PKM2 Isoform M2 of Pyruvate kinase isozymes M1/M2                | IPI00479186 | 58 kDa  | 14  | 19  | 6   | 12  | 0   | 2   | 17  | 9   | 1   | 0.1229 | 0.0255 | 0.1 | 0.1 |
| PKP1 Isoform 2 of Plakophilin-1                                  | IPI00071509 | 83 kDa  | 4   | 4   | 2   | 2   | 1   | 12  | 4   | 2   | 6   | 0.5010 | 0.6692 | 3.1 | 1.7 |
| PLAU Urokinase-type plasminogen activator precursor              | IPI00296180 | 49 kDa  | 52  | 40  | 38  | 37  | 2   | 1   | 46  | 38  | 2   | 0.0004 | 0.0169 | 0.0 | 0.0 |
| PLAUR Isoform 1 of Urokinase plasminogen activator surface       | IPI00010676 | 37 kDa  | 10  | 8   | 5   | 4   | 11  | 8   | 9   | 5   | 9   | 0.1320 | 0.8318 | 2.0 | 1.1 |
| PLD3 Phospholipase D3                                            | IPI00328243 | 55 kDa  | 13  | 8   | 11  | 12  | 8   | 5   | 11  | 12  | 7   | 0.0788 | 0.2897 | 0.6 | 0.6 |
| PLEKHB1 Isoform 2 of Pleckstrin homology domain-containing       | IPI00006009 | 23 kDa  | 1   | 1   | 2   | 1   | 1   | 1   | 1   | 2   | 1   | 0.4612 | 0.9116 | 0.7 | 1.0 |
| PLG Plasminogen precursor                                        | IPI00019580 | 91 kDa  | 50  | 47  | 128 | 105 | 64  | 46  | 49  | 116 | 55  | 0.0530 | 0.5553 | 0.5 | 1.1 |
| PLSCR1 Phospholipid scramblase 1                                 | IPI00005181 | 35 kDa  | 4   | 1   | 7   | 3   | 6   | 5   | 2   | 5   | 5   | 0.9426 | 0.1374 | 1.0 | 2.4 |
| PLXDC1 Isoform 1 of Plexin domain-containing protein 1 precursor | IPI00410122 | 56 kDa  | 1   | 2   | 4   | 7   | 1   | 1   | 2   | 6   | 1   | 0.0906 | 0.3292 | 0.2 | 0.7 |
| PLXDC2 Isoform 1 of Plexin domain-containing protein 2 precursor | IPI00044369 | 60 kDa  | 14  | 23  | 12  | 8   | 21  | 16  | 19  | 10  | 19  | 0.1005 | 0.9728 | 1.9 | 1.0 |
| PLXNB2 Plexin-B2 precursor                                       | IPI00853369 | 205 kDa | 6   | 3   | 0   | 4   | 0   | 2   | 4   | 2   | 1   | 0.7106 | 0.2042 | 0.5 | 0.2 |
| PODXL Podocalyxin-like protein 1 precursor                       | IPI00299116 | 56 kDa  | 43  | 45  | 37  | 39  | 40  | 42  | 44  | 38  | 41  | 0.2544 | 0.1483 | 1.1 | 0.9 |
| PPIA Peptidyl-prolyl cis-trans isomerase A                       | IPI00419585 | 18 kDa  | 18  | 21  | 12  | 13  | 4   | 6   | 19  | 13  | 5   | 0.0347 | 0.0163 | 0.4 | 0.3 |
| PPIB peptidylprolyl isomerase B precursor                        | IPI00646304 | 24 kDa  | 19  | 17  | 15  | 22  | 8   | 3   | 18  | 18  | 5   | 0.0896 | 0.0368 | 0.3 | 0.3 |
| PPIC Peptidyl-prolyl cis-trans isomerase C                       | IPI00024129 | 23 kDa  | 4   | 2   | 5   | 5   | 1   | 0   | 3   | 5   | 1   | 0.0137 | 0.1463 | 0.1 | 0.2 |
| PPL Perioplakin                                                  | IPI00298057 | 205 kDa | 0   | 0   | 0   | 0   | 3   | 5   | 0   | 0   | 4   | 0.0524 | 0.0524 | -   | -   |
| PPT1 Palmitoyl-protein thioesterase 1 precursor                  | IPI00002412 | 34 kDa  | 6   | 5   | 2   | 0   | 0   | 0   | 5   | 1   | 0   | 0.4226 | 0.0081 | 0.0 | 0.0 |
| PPT2 Isoform 1 of Lysosomal thioesterase PPT2 precursor          | IPI00021421 | 34 kDa  | 2   | 2   | 4   | 1   | 0   | 0   | 2   | 3   | 0   | 0.2413 | 0.0081 | 0.0 | 0.0 |
| PRCP Lysosomal Pro-X carboxypeptidase precursor                  | IPI00001593 | 56 kDa  | 26  | 25  | 26  | 25  | 10  | 10  | 26  | 26  | 10  | 0.0027 | 0.0019 | 0.4 | 0.4 |
| PRDX1 Peroxiredoxin-1                                            | IPI00000874 | 22 kDa  | 29  | 19  | 12  | 13  | 9   | 5   | 24  | 13  | 7   | 0.1063 | 0.0834 | 0.6 | 0.3 |
| PRDX2 Peroxiredoxin-2                                            | IPI00027350 | 22 kDa  | 17  | 17  | 10  | 13  | 9   | 2   | 17  | 11  | 5   | 0.2596 | 0.0755 | 0.5 | 0.3 |
| PRDX3 Thioredoxin-dependent peroxide reductase, mitochondrial    | IPI00024919 | 28 kDa  | 4   | 3   | 2   | 3   | 0   | 1   | 3   | 3   | 1   | 0.1045 | 0.0461 | 0.2 | 0.2 |
| PRDX5 Isoform of Mitochondrial Peroxiredoxin-5, mitochondrial    | IPI00024915 | 22 kDa  | 8   | 7   | 3   | 0   | 2   | 1   | 8   | 2   | 2   | 0.9796 | 0.0212 | 1.0 | 0.2 |
| PRDX6 Peroxiredoxin-6                                            | IPI00220301 | 25 kDa  | 12  | 7   | 5   | 5   | 2   | 0   | 9   | 5   | 1   | 0.0642 | 0.0913 | 0.2 | 0.1 |
| PRG2 Bone marrow proteoglycan precursor                          | IPI00010341 | 25 kDa  | 36  | 37  | 64  | 56  | 65  | 79  | 36  | 60  | 72  | 0.2682 | 0.0392 | 1.2 | 2.0 |
| PRG4 Isoform A of Proteoglycan-4 precursor                       | IPI00024825 | 151 kDa | 5   | 7   | 8   | 9   | 13  | 10  | 6   | 9   | 11  | 0.2981 | 0.1175 | 1.3 | 1.9 |



|                                                                       |             |         |     |     |     |     |     |     |     |     |     |        |        |      |     |
|-----------------------------------------------------------------------|-------------|---------|-----|-----|-----|-----|-----|-----|-----|-----|-----|--------|--------|------|-----|
| PRKCSH Glucosidase 2 subunit beta precursor                           | IPI00026154 | 59 kDa  | 17  | 21  | 14  | 13  | 18  | 15  | 19  | 14  | 16  | 0.1724 | 0.4064 | 1.2  | 0.9 |
| PRND Prion-like protein doppel precursor                              | IPI00018275 | 20 kDa  | 4   | 2   | 3   | 0   | 2   | 1   | 3   | 2   | 2   | 0.9796 | 0.3567 | 1.0  | 0.6 |
| PRNP Major prion protein precursor                                    | IPI00022284 | 28 kDa  | 14  | 17  | 16  | 16  | 15  | 15  | 16  | 16  | 15  | 0.1979 | 0.7521 | 1.0  | 1.0 |
| PROCR Endothelial protein C receptor precursor                        | IPI00009276 | 31 kDa  | 71  | 62  | 64  | 60  | 56  | 50  | 66  | 62  | 53  | 0.1248 | 0.1285 | 0.9  | 0.8 |
| PROM1 Prominin-1 precursor                                            | IPI00012540 | 97 kDa  | 56  | 53  | 70  | 70  | 35  | 48  | 55  | 70  | 42  | 0.0494 | 0.1962 | 0.6  | 0.8 |
| PROM2 Isoform 1 of Prominin-2 precursor                               | IPI00295988 | 92 kDa  | 16  | 19  | 13  | 14  | 21  | 19  | 17  | 14  | 20  | 0.0320 | 0.2725 | 1.5  | 1.2 |
| PROZ Isoform 1 of Vitamin K-dependent protein Z precursor             | IPI00027843 | 45 kDa  | 36  | 66  | 72  | 59  | 9   | 15  | 51  | 66  | 12  | 0.0176 | 0.1257 | 0.2  | 0.2 |
| PRSS2 Protease serine 2 isoform B                                     | IPI00011695 | 28 kDa  | 4   | 5   | 0   | 1   | 11  | 13  | 4   | 1   | 12  | 0.0087 | 0.0227 | 23.1 | 2.8 |
| PRSS8 Prostatic precursor                                             | IPI00329538 | 36 kDa  | 18  | 15  | 18  | 17  | 20  | 16  | 16  | 17  | 18  | 0.7679 | 0.6014 | 1.0  | 1.1 |
| PRTN3 Myeloblastin precursor                                          | IPI00027409 | 28 kDa  | 0   | 0   | 4   | 10  | 0   | 0   | 0   | 7   | 0   | 0.1399 | -      | 0.0  | -   |
| PSAP Isoform Sap-mu-0 of Proactivator polypeptide precursor           | IPI00012503 | 58 kDa  | 112 | 136 | 87  | 98  | 95  | 109 | 124 | 93  | 102 | 0.4201 | 0.2692 | 1.1  | 0.8 |
| PSCA Prostate stem cell antigen precursor                             | IPI00013446 | 13 kDa  | 38  | 28  | 46  | 37  | 34  | 36  | 33  | 41  | 35  | 0.2920 | 0.7287 | 0.9  | 1.1 |
| PSMB5 29 kDa protein                                                  | IPI00375704 | 29 kDa  | 5   | 8   | 0   | 4   | 1   | 0   | 6   | 2   | 1   | 0.5515 | 0.0746 | 0.3  | 0.1 |
| PSMB6 Proteasome subunit beta type-6 precursor                        | IPI00000811 | 25 kDa  | 4   | 7   | 4   | 4   | 0   | 0   | 5   | 4   | 0   | 0.0001 | 0.0895 | 0.0  | 0.0 |
| PTER Phosphotriesterase-related protein                               | IPI00100933 | 39 kDa  | 5   | 2   | 1   | 1   | 0   | 0   | 3   | 1   | 0   | 0.0001 | 0.1357 | 0.0  | 0.0 |
| PTGDS Prostaglandin-H2 D-isomerase precursor                          | IPI00013179 | 21 kDa  | 159 | 132 | 130 | 142 | 256 | 261 | 146 | 136 | 259 | 0.0026 | 0.0149 | 1.9  | 1.8 |
| PTGFRN Prostaglandin F2 receptor negative regulator precursor         | IPI00022048 | 99 kDa  | 0   | 1   | 2   | 3   | 0   | 0   | 1   | 3   | 0   | 0.0340 | 0.4226 | 0.0  | 0.0 |
| PTGR1 NADP-dependent leukotriene B4 12-hydroxydehydratase             | IPI00292657 | 36 kDa  | 14  | 8   | 10  | 11  | 3   | 8   | 11  | 10  | 5   | 0.1595 | 0.2696 | 0.5  | 0.5 |
| PTK7 PTK7 protein tyrosine kinase 7 isoform c precursor               | IPI00168813 | 104 kDa | 7   | 4   | 1   | 2   | 0   | 0   | 6   | 2   | 0   | 0.0905 | 0.0727 | 0.0  | 0.0 |
| PTPN13 Isoform 3 of Tyrosine-protein phosphatase non-receptor type 13 | IPI00006714 | 275 kDa | 1   | 3   | 0   | 0   | 6   | 5   | 2   | 0   | 5   | 0.0002 | 0.0661 | -    | 2.6 |
| PTPRF Receptor-type tyrosine-protein phosphatase F precursor          | IPI00107831 | 212 kDa | 2   | 6   | 1   | 3   | 4   | 1   | 4   | 2   | 3   | 0.7693 | 0.6116 | 1.3  | 0.7 |
| PTPRG Isoform 1 of Receptor-type tyrosine-protein phosphatase G       | IPI00011651 | 162 kDa | 2   | 3   | 11  | 10  | 0   | 1   | 3   | 10  | 1   | 0.0030 | 0.0723 | 0.1  | 0.2 |
| PTPRJ Receptor-type tyrosine-protein phosphatase eta precursor        | IPI00290328 | 152 kDa | 64  | 56  | 52  | 40  | 59  | 72  | 60  | 46  | 66  | 0.1483 | 0.5042 | 1.4  | 1.1 |
| PTPRK Isoform 1 of Receptor-type tyrosine-protein phosphatase K       | IPI00015756 | 162 kDa | 2   | 6   | 7   | 9   | 2   | 3   | 4   | 8   | 3   | 0.0346 | 0.5099 | 0.3  | 0.6 |
| PTPRM Receptor-type tyrosine-protein phosphatase mu precursor         | IPI00293849 | 164 kDa | 6   | 6   | 3   | 4   | 1   | 3   | 6   | 4   | 2   | 0.3270 | 0.0686 | 0.6  | 0.4 |
| PTPRS Isoform PTPS of Receptor-type tyrosine-protein phosphatase S    | IPI00289831 | 217 kDa | 22  | 26  | 20  | 30  | 14  | 15  | 24  | 25  | 15  | 0.1711 | 0.0553 | 0.6  | 0.6 |
| Putative uncharacterized protein                                      | IPI00785200 | 25 kDa  | 185 | 164 | 168 | 170 | 270 | 257 | 174 | 169 | 263 | 0.0048 | 0.0184 | 1.6  | 1.5 |
| PVR Isoform Beta of Poliovirus receptor precursor                     | IPI00219425 | 40 kDa  | 65  | 78  | 76  | 84  | 83  | 64  | 71  | 80  | 73  | 0.5716 | 0.8692 | 0.9  | 1.0 |
| PVRL1 Isoform Delta of Poliovirus receptor-related protein 1          | IPI00003648 | 57 kDa  | 8   | 4   | 10  | 4   | 2   | 2   | 6   | 7   | 2   | 0.2258 | 0.2085 | 0.3  | 0.4 |
| PVRL2 Isoform Delta of Poliovirus receptor-related protein 2          | IPI00022661 | 58 kDa  | 38  | 32  | 29  | 33  | 22  | 26  | 35  | 31  | 24  | 0.1414 | 0.0924 | 0.8  | 0.7 |
| PVRL4 Poliovirus receptor-related protein 4 precursor                 | IPI00043992 | 55 kDa  | 34  | 18  | 33  | 35  | 25  | 23  | 26  | 34  | 24  | 0.0311 | 0.8359 | 0.7  | 0.9 |
| PYGM Glycogen phosphorylase, muscle form                              | IPI00218130 | 97 kDa  | 0   | 3   | 1   | 1   | 2   | 2   | 2   | 1   | 2   | 0.0007 | 0.6973 | 2.1  | 1.4 |
| QPCT Glutaminyl-peptide cyclotransferase precursor                    | IPI00003919 | 41 kDa  | 96  | 85  | 137 | 152 | 89  | 98  | 90  | 144 | 93  | 0.0291 | 0.7124 | 0.6  | 1.0 |
| QPR1 Nicotinate-nucleotide pyrophosphorylase                          | IPI00300086 | 31 kDa  | 12  | 12  | 7   | 3   | 0   | 0   | 12  | 5   | 0   | 0.1346 | 0.0000 | 0.0  | 0.0 |
| QSOX1 Isoform 1 of Sulfhydryl oxidase 1 precursor                     | IPI00003590 | 83 kDa  | 70  | 51  | 84  | 78  | 39  | 35  | 60  | 81  | 37  | 0.0059 | 0.1314 | 0.5  | 0.6 |
| RAB10 Ras-related protein Rab-10                                      | IPI00016513 | 23 kDa  | 5   | 13  | 5   | 8   | 4   | 4   | 9   | 7   | 4   | 0.2441 | 0.3829 | 0.6  | 0.5 |
| RAB11B Ras-related protein Rab-11B                                    | IPI00020436 | 24 kDa  | 5   | 0   | 2   | 3   | 2   | 1   | 2   | 3   | 2   | 0.3230 | 0.7866 | 0.6  | 0.7 |
| RAB13 Ras-related protein Rab-13                                      | IPI00016373 | 23 kDa  | 4   | 3   | 0   | 3   | 2   | 0   | 3   | 2   | 1   | 0.8342 | 0.1936 | 0.7  | 0.3 |
| RAB1B Ras-related protein Rab-1B                                      | IPI00008964 | 22 kDa  | 10  | 6   | 0   | 7   | 0   | 0   | 8   | 4   | 0   | 0.4226 | 0.0492 | 0.0  | 0.0 |
| RAB21 Ras-related protein Rab-21                                      | IPI00007755 | 24 kDa  | 1   | 4   | 2   | 2   | 2   | 0   | 3   | 2   | 1   | 0.4618 | 0.4885 | 0.5  | 0.4 |
| RAB35 Ras-related protein Rab-35                                      | IPI00300096 | 23 kDa  | 7   | 0   | 0   | 7   | 0   | 0   | 4   | 4   | 0   | 0.4226 | 0.4226 | 0.0  | 0.0 |
| RAB5C Ras-related protein Rab-5C                                      | IPI00016339 | 23 kDa  | 5   | 4   | 3   | 2   | 1   | 1   | 4   | 3   | 1   | 0.1089 | 0.0142 | 0.4  | 0.2 |
| RAB7A Ras-related protein Rab-7a                                      | IPI00016342 | 23 kDa  | 4   | 3   | 0   | 2   | 1   | 0   | 3   | 1   | 1   | 0.7192 | 0.0481 | 0.5  | 0.2 |
| RAC1 Isoform A of Ras-related C3 botulinum toxin substrate 1          | IPI00010271 | 21 kDa  | 8   | 9   | 12  | 11  | 6   | 4   | 9   | 12  | 5   | 0.0086 | 0.0302 | 0.4  | 0.6 |
| RALB Ras-related protein Ral-B precursor                              | IPI00004397 | 23 kDa  | 0   | 2   | 0   | 3   | 2   | 0   | 1   | 2   | 1   | 0.8342 | 0.9524 | 0.7  | 1.1 |
| RAP1A Ras-related protein Rap-1A precursor                            | IPI00019345 | 21 kDa  | 5   | 6   | 3   | 8   | 4   | 4   | 5   | 6   | 4   | 0.6425 | 0.2244 | 0.8  | 0.8 |
| RARRES1 Isoform 2 of Retinoic acid receptor responder protein 1       | IPI00410240 | 33 kDa  | 0   | 0   | 29  | 35  | 3   | 0   | 0   | 32  | 2   | 0.0146 | 0.4226 | 0.1  | -   |



|                                                                |             |         |     |     |     |     |     |     |     |     |     |        |        |     |     |
|----------------------------------------------------------------|-------------|---------|-----|-----|-----|-----|-----|-----|-----|-----|-----|--------|--------|-----|-----|
| RARRES2 Retinoic acid receptor responder protein 2 precursor   | IPI00019176 | 19 kDa  | 7   | 13  | 11  | 7   | 7   | 1   | 10  | 9   | 4   | 0.2564 | 0.2588 | 0.4 | 0.4 |
| RBP2 Retinol-binding protein II, cellular                      | IPI00419986 | 16 kDa  | 1   | 1   | 0   | 0   | 2   | 1   | 1   | 0   | 2   | 0.1009 | 0.4467 | -   | 1.5 |
| RBP4 Plasma retinol-binding protein precursor                  | IPI00022420 | 23 kDa  | 96  | 90  | 53  | 76  | 77  | 92  | 93  | 64  | 85  | 0.2737 | 0.4186 | 1.3 | 0.9 |
| RBP5 Retinol-binding protein III, cellular                     | IPI00219782 | 16 kDa  | 5   | 7   | 5   | 1   | 2   | 0   | 6   | 3   | 1   | 0.4798 | 0.0912 | 0.3 | 0.2 |
| RDX Radixin isoform b                                          | IPI00017367 | 71 kDa  | 48  | 38  | 53  | 39  | 52  | 44  | 43  | 46  | 48  | 0.8464 | 0.5190 | 1.0 | 1.1 |
| RECK Reversion-inducing cysteine-rich protein with Kazal n     | IPI00028082 | 106 kDa | 1   | 1   | 3   | 0   | 0   | 0   | 1   | 2   | 0   | 0.4226 | 0.0081 | 0.0 | 0.0 |
| REG1A Lithostathine-1-alpha precursor                          | IPI00009027 | 19 kDa  | 83  | 62  | 76  | 82  | 145 | 130 | 72  | 79  | 138 | 0.0189 | 0.0370 | 1.7 | 1.9 |
| REG1B Lithostathine-1-beta precursor                           | IPI00009197 | 19 kDa  | 0   | 0   | 0   | 0   | 84  | 62  | 0   | 0   | 73  | 0.0208 | 0.0208 | -   | -   |
| RELT Tumor necrosis factor receptor superfamily member         | IPI00064377 | 46 kDa  | 20  | 22  | 14  | 9   | 12  | 10  | 21  | 12  | 11  | 0.8192 | 0.0196 | 0.9 | 0.5 |
| RETN Resistin precursor                                        | IPI00006988 | 11 kDa  | 18  | 19  | 14  | 12  | 19  | 26  | 18  | 13  | 22  | 0.1260 | 0.4041 | 1.7 | 1.2 |
| RGMA Isoform 2 of Repulsive guidance molecule A precursor      | IPI00015049 | 53 kDa  | 0   | 0   | 2   | 1   | 0   | 0   | 0   | 2   | 0   | 0.1004 | -      | 0.0 | -   |
| RHOA Transforming protein RhoA precursor                       | IPI00478231 | 22 kDa  | 16  | 11  | 7   | 11  | 2   | 3   | 13  | 9   | 3   | 0.0826 | 0.0459 | 0.3 | 0.2 |
| RHOF Isoform 1 of Rho-related GTP-binding protein RhoF         | IPI00307458 | 24 kDa  | 6   | 3   | 1   | 0   | 0   | 0   | 4   | 1   | 0   | 0.4226 | 0.0953 | 0.0 | 0.0 |
| RNASE1 Ribonuclease pancreatic precursor                       | IPI00014048 | 18 kDa  | 291 | 291 | 281 | 366 | 469 | 503 | 291 | 324 | 486 | 0.0725 | 0.0078 | 1.5 | 1.7 |
| RNASE4 Ribonuclease 4 precursor                                | IPI00029699 | 17 kDa  | 5   | 3   | 3   | 3   | 2   | 1   | 4   | 3   | 2   | 0.1167 | 0.1666 | 0.5 | 0.4 |
| RNASE6 Ribonuclease K6 precursor                               | IPI00004114 | 17 kDa  | 1   | 3   | 1   | 0   | 2   | 2   | 2   | 1   | 2   | 0.0901 | 0.9418 | 4.1 | 1.0 |
| RNASE7 Ribonuclease 7 precursor                                | IPI00000270 | 17 kDa  | 0   | 1   | 0   | 3   | 0   | 0   | 1   | 2   | 0   | 0.4226 | 0.4226 | 0.0 | 0.0 |
| RNASF2 Isoform 1 of Ribonuclease T2 precursor                  | IPI00414896 | 29 kDa  | 44  | 23  | 31  | 23  | 34  | 16  | 34  | 27  | 25  | 0.8831 | 0.6018 | 0.9 | 0.7 |
| RNF13 RING finger protein 13                                   | IPI00151036 | 43 kDa  | 2   | 4   | 1   | 0   | 2   | 0   | 3   | 1   | 1   | 0.6862 | 0.2630 | 2.1 | 0.3 |
| RNF167 E3 ubiquitin-protein ligase RNF167 precursor            | IPI00023511 | 38 kDa  | 5   | 2   | 0   | 0   | 1   | 0   | 3   | 0   | 1   | 0.4226 | 0.1985 | -   | 0.2 |
| RNH1 Ribonuclease inhibitor                                    | IPI00550069 | 50 kDa  | 4   | 4   | 3   | 4   | 0   | 1   | 4   | 4   | 1   | 0.0495 | 0.0295 | 0.1 | 0.1 |
| ROBO4 Isoform 1 of Roundabout homolog 4 precursor              | IPI00103871 | 107 kDa | 161 | 140 | 158 | 151 | 55  | 49  | 150 | 154 | 52  | 0.0018 | 0.0117 | 0.3 | 0.3 |
| ROR1 receptor tyrosine kinase-like orphan receptor 1 isoform   | IPI00644416 | 44 kDa  | 11  | 6   | 13  | 20  | 4   | 1   | 8   | 16  | 3   | 0.0733 | 0.1919 | 0.2 | 0.3 |
| ROR2 Tyrosine-protein kinase transmembrane receptor RC         | IPI00304999 | 105 kDa | 13  | 14  | 8   | 12  | 11  | 8   | 14  | 10  | 9   | 0.6961 | 0.1365 | 0.9 | 0.7 |
| RP11-151A6.2 hypothetical protein LOC87769                     | IPI00042295 | 39 kDa  | 2   | 3   | 2   | 0   | 2   | 4   | 3   | 1   | 3   | 0.2794 | 0.6646 | 3.1 | 1.2 |
| RPS27A;UBC;UBB ubiquitin and ribosomal protein S27a precursor  | IPI00179330 | 18 kDa  | 133 | 141 | 94  | 121 | 105 | 160 | 137 | 108 | 132 | 0.5090 | 0.8795 | 1.2 | 1.0 |
| RPS6 40S ribosomal protein S6                                  | IPI00021840 | 29 kDa  | 0   | 2   | 0   | 0   | 0   | 0   | 1   | 0   | 0   | -      | 0.4226 | -   | 0.0 |
| RRAS2 Ras-related protein R-Ras2 precursor                     | IPI00012512 | 23 kDa  | 2   | 2   | 1   | 2   | 1   | 2   | 2   | 2   | 2   | 0.9429 | 0.4122 | 1.0 | 0.7 |
| RTN4R Reticulon-4 receptor precursor                           | IPI00289204 | 51 kDa  | 8   | 1   | 3   | 2   | 0   | 0   | 5   | 3   | 0   | 0.0417 | 0.3317 | 0.0 | 0.0 |
| RTN4RL2 Reticulon-4 receptor-like 2 precursor                  | IPI00328746 | 46 kDa  | 30  | 29  | 25  | 35  | 15  | 12  | 29  | 30  | 14  | 0.0851 | 0.0135 | 0.4 | 0.5 |
| S100A11 Protein S100-A11                                       | IPI00013895 | 12 kDa  | 14  | 14  | 4   | 9   | 10  | 9   | 14  | 7   | 9   | 0.4462 | 0.0186 | 1.4 | 0.7 |
| S100A6 Protein S100-A6                                         | IPI00027463 | 10 kDa  | 5   | 13  | 4   | 5   | 7   | 3   | 9   | 5   | 5   | 0.9177 | 0.4637 | 1.0 | 0.6 |
| S100A7 Protein S100-A7                                         | IPI00219806 | 11 kDa  | 11  | 17  | 19  | 19  | 1   | 0   | 14  | 19  | 1   | 0.0010 | 0.0515 | 0.0 | 0.0 |
| S100A8 Protein S100-A8                                         | IPI00007047 | 11 kDa  | 17  | 21  | 48  | 47  | 19  | 18  | 19  | 47  | 18  | 0.0004 | 0.8626 | 0.4 | 1.0 |
| S100A9 Protein S100-A9                                         | IPI00027462 | 13 kDa  | 14  | 19  | 41  | 52  | 14  | 16  | 17  | 47  | 15  | 0.0275 | 0.6082 | 0.3 | 0.9 |
| S100P Protein S100-P                                           | IPI00017526 | 10 kDa  | 4   | 5   | 2   | 3   | 1   | 3   | 4   | 3   | 2   | 0.7366 | 0.2346 | 0.8 | 0.5 |
| SAA4 Serum amyloid A-4 protein precursor                       | IPI00019399 | 15 kDa  | 0   | 1   | 2   | 0   | 0   | 0   | 1   | 1   | 0   | 0.4226 | 0.4226 | 0.0 | 0.0 |
| SCARB2 Lysosome membrane protein 2                             | IPI00217766 | 54 kDa  | 4   | 7   | 2   | 3   | 2   | 1   | 5   | 3   | 2   | 0.3230 | 0.1778 | 0.6 | 0.3 |
| SCGB1A1 Uteroglobin precursor                                  | IPI00006705 | 10 kDa  | 12  | 14  | 20  | 14  | 19  | 30  | 13  | 17  | 24  | 0.3803 | 0.1869 | 1.4 | 1.9 |
| SCGB1D2 Secretoglobulin family 1D member 2 precursor           | IPI00001469 | 10 kDa  | 2   | 2   | 4   | 3   | 1   | 1   | 2   | 4   | 1   | 0.0447 | 0.0307 | 0.3 | 0.5 |
| SCIN Isoform 1 of Adseverin                                    | IPI00002606 | 80 kDa  | 5   | 7   | 0   | 1   | 3   | 1   | 6   | 1   | 2   | 0.3070 | 0.1414 | 4.2 | 0.4 |
| SCNN1G Amiloride-sensitive sodium channel subunit gamma        | IPI00016450 | 74 kDa  | 1   | 3   | 3   | 3   | 1   | 0   | 2   | 3   | 1   | 0.0424 | 0.2798 | 0.2 | 0.3 |
| SCPEP1 Isoform 1 of Retinoid-inducible serine carboxypeptidase | IPI00012426 | 51 kDa  | 35  | 28  | 11  | 11  | 17  | 10  | 31  | 11  | 13  | 0.6051 | 0.0627 | 1.2 | 0.4 |
| SCUBE1 SCUBE1 protein                                          | IPI00395866 | 37 kDa  | 7   | 2   | 5   | 6   | 2   | 9   | 5   | 6   | 5   | 0.9216 | 0.8643 | 0.9 | 1.2 |
| SCUBE2 Isoform 1 of Signal peptide, CUB and EGF-like domain    | IPI00024880 | 110 kDa | 7   | 6   | 7   | 5   | 7   | 13  | 7   | 6   | 10  | 0.4097 | 0.4289 | 1.5 | 1.5 |
| SDC4 Syndecan-4 precursor                                      | IPI00011564 | 22 kDa  | 38  | 42  | 23  | 31  | 65  | 65  | 40  | 27  | 65  | 0.0103 | 0.0054 | 2.4 | 1.6 |
| SDCBP Syntenin-1                                               | IPI00299086 | 32 kDa  | 20  | 10  | 13  | 11  | 12  | 11  | 15  | 12  | 11  | 0.5762 | 0.5461 | 0.9 | 0.8 |

|                                                               |             |         |     |     |     |     |     |     |     |     |        |        |        |     |      |
|---------------------------------------------------------------|-------------|---------|-----|-----|-----|-----|-----|-----|-----|-----|--------|--------|--------|-----|------|
| SDF4 45 kDa calcium-binding protein precursor                 | IPI00106646 | 42 kDa  | 19  | 14  | 13  | 14  | 1   | 0   | 17  | 14  | 1      | 0.0064 | 0.0262 | 0.0 | 0.0  |
| SDK1 Isoform 3 of Protein sidekick-1 precursor                | IPI00383951 | 240 kDa | 2   | 2   | 3   | 0   | 1   | 0   | 2   | 2   | 1      | 0.5998 | 0.1062 | 0.3 | 0.3  |
| SECTM1 Secreted and transmembrane protein 1 precursor         | IPI00170635 | 27 kDa  | 79  | 76  | 119 | 105 | 99  | 102 | 78  | 112 | 101    | 0.2624 | 0.0087 | 0.9 | 1.3  |
| SELENBP1 Selenium-binding protein 1                           | IPI00012303 | 52 kDa  | 16  | 12  | 8   | 14  | 12  | 10  | 14  | 11  | 11     | 0.8704 | 0.3117 | 0.9 | 0.8  |
| SELL L-selectin precursor                                     | IPI00218795 | 44 kDa  | 0   | 1   | 2   | 4   | 1   | 2   | 1   | 3   | 2      | 0.3171 | 0.2608 | 0.5 | 3.2  |
| SEMA5A Semaphorin-5A precursor                                | IPI00013880 | 121 kDa | 7   | 10  | 4   | 10  | 4   | 8   | 9   | 7   | 6      | 0.7345 | 0.3350 | 0.8 | 0.7  |
| SEMG1 Isoform 1 of Semenogelin-1 precursor                    | IPI00023020 | 52 kDa  | 0   | 1   | 191 | 204 | 19  | 13  | 1   | 197 | 16     | 0.0016 | 0.0353 | 0.1 | 31.6 |
| SEMG2 Semenogelin-2 precursor                                 | IPI00025415 | 65 kDa  | 1   | 0   | 230 | 208 | 29  | 19  | 1   | 219 | 24     | 0.0036 | 0.0379 | 0.1 | 40.0 |
| SERPINA1 Isoform 1 of Alpha-1-antitrypsin precursor           | IPI00553177 | 47 kDa  | 438 | 431 | 414 | 419 | 489 | 485 | 434 | 417 | 487    | 0.0019 | 0.0049 | 1.2 | 1.1  |
| SERPINA3 Alpha-1-antichymotrypsin precursor                   | IPI00550991 | 51 kDa  | 203 | 211 | 144 | 152 | 153 | 199 | 207 | 148 | 176    | 0.3552 | 0.3128 | 1.2 | 0.8  |
| SERPINA4 Kallistatin precursor                                | IPI00328609 | 49 kDa  | 12  | 12  | 17  | 10  | 1   | 2   | 12  | 14  | 2      | 0.0691 | 0.0025 | 0.1 | 0.1  |
| SERPINA5 Plasma serine protease inhibitor precursor           | IPI00007221 | 46 kDa  | 155 | 152 | 126 | 128 | 113 | 100 | 153 | 127 | 107    | 0.0950 | 0.0210 | 0.8 | 0.7  |
| SERPINA6 Corticosteroid-binding globulin precursor            | IPI00027482 | 45 kDa  | 30  | 23  | 41  | 32  | 32  | 30  | 26  | 37  | 31     | 0.3477 | 0.3389 | 0.8 | 1.2  |
| SERPINA7 Thyroxine-binding globulin precursor                 | IPI00292946 | 46 kDa  | 62  | 60  | 59  | 67  | 68  | 97  | 61  | 63  | 82     | 0.3243 | 0.2744 | 1.3 | 1.3  |
| SERPINB1 Leukocyte elastase inhibitor                         | IPI00027444 | 43 kDa  | 7   | 5   | 11  | 16  | 6   | 6   | 6   | 13  | 6      | 0.1061 | 0.9257 | 0.5 | 1.0  |
| SERPINB12 SERPINB12 protein                                   | IPI00643202 | 48 kDa  | 4   | 4   | 23  | 18  | 1   | 1   | 4   | 20  | 1      | 0.0210 | 0.0055 | 0.1 | 0.3  |
| SERPINB3 Isoform 1 of Serpin B3                               | IPI00022204 | 45 kDa  | 19  | 14  | 43  | 43  | 2   | 0   | 17  | 43  | 1      | 0.0007 | 0.0315 | 0.0 | 0.1  |
| SERPINB3 SCCA2/SCCA1 fusion protein isoform 1                 | IPI00896442 | 45 kDa  | 0   | 0   | 39  | 43  | 0   | 0   | 0   | 41  | 0      | 0.0027 | -      | 0.0 | -    |
| SERPINB6 Putative uncharacterized protein DKFZp686I042        | IPI00413451 | 46 kDa  | 2   | 1   | 2   | 2   | 0   | 0   | 2   | 2   | 0      | 0.0001 | 0.1357 | 0.0 | 0.0  |
| SERPINF1 Pigment epithelium-derived factor precursor          | IPI00006114 | 46 kDa  | 11  | 10  | 8   | 10  | 1   | 1   | 10  | 9   | 1      | 0.0125 | 0.0018 | 0.1 | 0.1  |
| SERPINF2 SERPINF2 protein                                     | IPI00029863 | 55 kDa  | 14  | 14  | 34  | 21  | 7   | 5   | 14  | 27  | 6      | 0.0844 | 0.0062 | 0.2 | 0.4  |
| SERPING1 Plasma protease C1 inhibitor precursor               | IPI00291866 | 55 kDa  | 273 | 312 | 277 | 320 | 259 | 239 | 293 | 299 | 249    | 0.1665 | 0.1799 | 0.8 | 0.9  |
| SERPINI1 Neuroserpin precursor                                | IPI00016150 | 46 kDa  | 12  | 6   | 13  | 13  | 9   | 18  | 9   | 13  | 14     | 0.9341 | 0.5029 | 1.0 | 1.5  |
| SEZGL2 Isoform 3 of Seizure 6-like protein 2 precursor        | IPI00018276 | 92 kDa  | 11  | 16  | 4   | 13  | 11  | 8   | 13  | 9   | 9      | 0.9411 | 0.3178 | 1.0 | 0.7  |
| SFN Isoform 1 of 14-3-3 protein sigma                         | IPI00013890 | 28 kDa  | 5   | 3   | 2   | 0   | 0   | 2   | 4   | 1   | 1      | 0.9932 | 0.1811 | 1.0 | 0.3  |
| SGSH N-sulphoglucosamine sulphohydrolase precursor            | IPI00019988 | 57 kDa  | 43  | 50  | 33  | 37  | 0   | 2   | 47  | 35  | 1      | 0.0052 | 0.0061 | 0.0 | 0.0  |
| SH3BGRL3 SH3 domain-binding glutamic acid-rich-like prote     | IPI00025318 | 13 kDa  | 0   | 2   | 2   | 0   | 4   | 0   | 1   | 1   | 2      | 0.6862 | 0.6686 | 2.1 | 2.2  |
| SH3BGRL3 SH3 domain-binding glutamic acid-rich-like prot      | IPI00746352 | 10 kDa  | 19  | 22  | 18  | 14  | 36  | 26  | 21  | 16  | 31     | 0.1169 | 0.1958 | 1.9 | 1.5  |
| SHBG Isoform 1 of Sex hormone-binding globulin precursor      | IPI00023019 | 44 kDa  | 0   | 0   | 2   | 0   | 0   | 0   | 0   | 1   | 0      | 0.4226 | -      | 0.0 | -    |
| SHISA2 Protein shisa-2 homolog precursor                      | IPI00244512 | 31 kDa  | 1   | 2   | 0   | 0   | 1   | 2   | 0   | 1   | 0.0002 | 0.3292 | -      | 0.7 |      |
| SHISA5 Isoform 1 of Protein shisa-5 precursor                 | IPI00166039 | 26 kDa  | 12  | 12  | 6   | 7   | 11  | 13  | 12  | 7   | 12     | 0.0386 | 0.9605 | 1.8 | 1.0  |
| SHMT1 Isoform 1 of Serine hydroxymethyltransferase, cytc      | IPI00002519 | 53 kDa  | 6   | 4   | 2   | 1   | 1   | 0   | 5   | 2   | 1      | 0.3149 | 0.0598 | 0.3 | 0.1  |
| SIAE Isoform 1 of Sialate O-acetyltransferase precursor       | IPI00010949 | 58 kDa  | 54  | 40  | 34  | 35  | 14  | 15  | 47  | 35  | 15     | 0.0014 | 0.0437 | 0.4 | 0.3  |
| SIRPA signal-regulatory protein alpha precursor               | IPI00332887 | 55 kDa  | 68  | 56  | 58  | 88  | 80  | 82  | 62  | 73  | 81     | 0.6515 | 0.0940 | 1.1 | 1.3  |
| SIRPB1 Isoform 1 of Signal regulatory protein beta-1 precu    | IPI00299724 | 43 kDa  | 32  | 35  | 22  | 35  | 57  | 42  | 34  | 29  | 50     | 0.1739 | 0.1787 | 1.7 | 1.5  |
| SIRPB2 Isoform 1 of Signal-regulatory protein beta-2 precu    | IPI00552528 | 37 kDa  | 10  | 4   | 2   | 3   | 1   | 0   | 7   | 3   | 1      | 0.1081 | 0.1597 | 0.2 | 0.1  |
| SLC12A1 Solute carrier family 12 member 1                     | IPI00443898 | 121 kDa | 167 | 162 | 85  | 67  | 140 | 191 | 164 | 76  | 165    | 0.0809 | 0.9704 | 2.2 | 1.0  |
| SLC12A3 Solute carrier family 12 member 3                     | IPI00216438 | 113 kDa | 47  | 59  | 32  | 39  | 10  | 17  | 53  | 36  | 14     | 0.0524 | 0.0312 | 0.4 | 0.3  |
| SLC13A2 Solute carrier family 13 member 2                     | IPI00011981 | 64 kDa  | 0   | 0   | 2   | 0   | 0   | 0   | 0   | 1   | 0      | 0.4226 | -      | 0.0 | -    |
| SLC23A1 Isoform 2 of Solute carrier family 23 member 1        | IPI00220368 | 65 kDa  | 0   | 1   | 8   | 5   | 0   | 0   | 1   | 7   | 0      | 0.0536 | 0.4226 | 0.0 | 0.0  |
| SLC26A4 Pendrin                                               | IPI00012842 | 86 kDa  | 2   | 3   | 0   | 2   | 0   | 2   | 3   | 1   | 1      | 0.9819 | 0.2822 | 1.0 | 0.4  |
| SLC2A5 Solute carrier family 2, facilitated glucose transport | IPI00027452 | 55 kDa  | 7   | 2   | 8   | 9   | 0   | 0   | 5   | 9   | 0      | 0.0023 | 0.2187 | 0.0 | 0.0  |
| SLC38A10 Isoform 1 of Putative sodium-coupled neutral ar      | IPI00443799 | 120 kDa | 2   | 1   | 1   | 0   | 0   | 0   | 2   | 1   | 0      | 0.4226 | 0.1357 | 0.0 | 0.0  |
| SLC3A1 Neutral and basic amino acid transport protein rBA     | IPI00029268 | 79 kDa  | 1   | 2   | 0   | 0   | 0   | 0   | 2   | 0   | 0      | -      | 0.0574 | -   | 0.0  |
| SLC44A2 Isoform 1 of Choline transporter-like protein 2       | IPI00549521 | 80 kDa  | 16  | 16  | 12  | 7   | 18  | 15  | 16  | 9   | 16     | 0.1146 | 0.7270 | 1.7 | 1.0  |
| SLC44A4 Isoform 2 of Choline transporter-like protein 4       | IPI00641073 | 79 kDa  | 8   | 30  | 13  | 25  | 20  | 26  | 19  | 19  | 23     | 0.6135 | 0.7792 | 1.2 | 1.2  |
| SLC5A1 SLC5A1 protein (Fragment)                              | IPI00010866 | 74 kDa  | 0   | 0   | 10  | 5   | 0   | 0   | 0   | 7   | 0      | 0.0776 | -      | 0.0 | -    |

|                                                                |                 |         |     |     |     |     |     |     |     |     |     |        |        |     |      |
|----------------------------------------------------------------|-----------------|---------|-----|-----|-----|-----|-----|-----|-----|-----|-----|--------|--------|-----|------|
| SLC5A10 Isoform 1 of Sodium/glucose cotransporter 5            | IPI00441079     | 64 kDa  | 0   | 0   | 15  | 19  | 0   | 0   | 0   | 17  | 0   | 0.0127 | -      | 0.0 | -    |
| SLC9A3R1 Ezrin-radixin-moesin-binding phosphoprotein 5         | IPI00003527     | 39 kDa  | 16  | 9   | 32  | 39  | 8   | 11  | 12  | 36  | 9   | 0.0232 | 0.4857 | 0.3 | 0.7  |
| SLIT2 Isoform 1 of Slit homolog 2 protein precursor            | IPI00006288     | 170 kDa | 0   | 2   | 0   | 0   | 0   | 0   | 1   | 0   | 0   | -      | 0.4226 | -   | 0.0  |
| SLK Isoform 1 of STE20-like serine/threonine-protein kinase    | IPI00022827     | 143 kDa | 1   | 5   | 1   | 1   | 7   | 8   | 3   | 1   | 7   | 0.0057 | 0.1801 | 6.7 | 2.3  |
| SLPI Antileukoproteinase precursor                             | IPI00008580     | 14 kDa  | 6   | 7   | 7   | 6   | 6   | 4   | 6   | 7   | 5   | 0.1535 | 0.1786 | 0.7 | 0.8  |
| SLURP1 Secreted Ly-6/uPAR-related protein 1 precursor          | IPI00022620     | 11 kDa  | 17  | 19  | 22  | 20  | 28  | 38  | 18  | 21  | 33  | 0.1554 | 0.1047 | 1.6 | 1.8  |
| SMPD1 sphingomyelin phosphodiesterase 1, acid lysosomal        | IPI00218784     | 65 kDa  | 1   | 2   | 1   | 2   | 0   | 0   | 2   | 2   | 0   | 0.0905 | 0.0574 | 0.0 | 0.0  |
| SNCG Gamma-synuclein                                           | IPI00297714     | 13 kDa  | 1   | 1   | 0   | 0   | 2   | 1   | 1   | 0   | 2   | 0.1009 | 0.4467 | -   | 1.5  |
| SNX18 Sorting nexin-18                                         | IPI00045219     | 69 kDa  | 4   | 2   | 2   | 1   | 1   | 2   | 3   | 2   | 2   | 0.9559 | 0.3436 | 1.0 | 0.6  |
| SOD1 Superoxide dismutase                                      | IPI00218733     | 16 kDa  | 12  | 9   | 3   | 2   | 2   | 2   | 10  | 3   | 2   | 0.5018 | 0.0308 | 0.8 | 0.2  |
| SOD3 Extracellular superoxide dismutase [Cu-Zn] precursor      | IPI00027827     | 26 kDa  | 25  | 26  | 29  | 31  | 7   | 10  | 26  | 30  | 8   | 0.0081 | 0.0081 | 0.3 | 0.3  |
| SORD Sorbitol dehydrogenase                                    | IPI00216057     | 38 kDa  | 19  | 10  | 11  | 7   | 4   | 2   | 15  | 9   | 3   | 0.1074 | 0.1390 | 0.4 | 0.2  |
| SORL1 Sortilin-related receptor precursor                      | IPI00022608     | 248 kDa | 150 | 127 | 111 | 108 | 86  | 107 | 138 | 109 | 97  | 0.3600 | 0.1167 | 0.9 | 0.7  |
| SORT1 Sortilin precursor                                       | IPI00217882     | 92 kDa  | 1   | 2   | 2   | 0   | 1   | 0   | 2   | 1   | 1   | 0.7113 | 0.2630 | 0.5 | 0.3  |
| sp_ALBU_BOVIN                                                  | IPIsp_ALBU_BOVI | 69 kDa  | 255 | 257 | 256 | 240 | 431 | 399 | 256 | 248 | 415 | 0.0113 | 0.0100 | 1.7 | 1.6  |
| sp_ANT3_HUMAN                                                  | IPIsp_ANT3_HUM  | 53 kDa  | 38  | 29  | 37  | 43  | 56  | 68  | 34  | 40  | 62  | 0.0819 | 0.0629 | 1.5 | 1.8  |
| sp_B2MG_HUMAN                                                  | IPIsp_B2MG_HUM  | 14 kDa  | 52  | 57  | 49  | 46  | 61  | 85  | 54  | 47  | 73  | 0.1725 | 0.2777 | 1.5 | 1.3  |
| sp_K2M2_SHEEP                                                  | IPIsp_K2M2_SHEE | 54 kDa  | 0   | 6   | 0   | 0   | 0   | 73  | 3   | 0   | 36  | 0.4226 | 0.4569 | -   | 12.2 |
| sp_PEPa_PIG                                                    | IPIsp_PEPa_PIG  | 41 kDa  | 5   | 2   | 1   | 3   | 1   | 6   | 3   | 2   | 4   | 0.6148 | 0.9129 | 1.8 | 1.1  |
| sp_TRYP_PIG                                                    | IPIsp_TRYP_PIG  | 24 kDa  | 605 | 537 | 586 | 562 | 604 | 526 | 571 | 574 | 565 | 0.8482 | 0.9158 | 1.0 | 1.0  |
| SPARCL1 15 kDa protein                                         | IPI00793166     | 15 kDa  | 0   | 1   | 13  | 3   | 6   | 5   | 1   | 8   | 5   | 0.6579 | 0.0103 | 0.7 | 10.9 |
| SPARCL1 SPARC-like protein 1 precursor                         | IPI00296777     | 75 kDa  | 43  | 53  | 97  | 86  | 63  | 63  | 48  | 92  | 63  | 0.0381 | 0.0937 | 0.7 | 1.3  |
| SPINK1 Pancreatic secretory trypsin inhibitor precursor        | IPI00020687     | 9 kDa   | 10  | 25  | 3   | 6   | 10  | 11  | 17  | 5   | 10  | 0.0701 | 0.4613 | 2.2 | 0.6  |
| SPINT1 Isoform 2 of Kunitz-type protease inhibitor 1 precursor | IPI00011643     | 57 kDa  | 18  | 14  | 12  | 21  | 25  | 21  | 16  | 16  | 23  | 0.2803 | 0.1160 | 1.4 | 1.5  |
| SPINT2 Kunitz-type protease inhibitor 2 precursor              | IPI00011662     | 28 kDa  | 24  | 17  | 16  | 12  | 12  | 12  | 20  | 14  | 12  | 0.3331 | 0.1345 | 0.8 | 0.6  |
| SPOCK2 Testican-2 precursor                                    | IPI00006128     | 47 kDa  | 4   | 15  | 2   | 5   | 7   | 4   | 9   | 4   | 5   | 0.4465 | 0.5761 | 1.5 | 0.6  |
| SPP1 Isoform A of Osteopontin precursor                        | IPI00021000     | 35 kDa  | 410 | 398 | 210 | 168 | 259 | 326 | 404 | 189 | 292 | 0.1213 | 0.0834 | 1.5 | 0.7  |
| SPP1 Isoform C of Osteopontin precursor                        | IPI00218875     | 32 kDa  | 363 | 358 | 0   | 0   | 218 | 0   | 361 | 0   | 109 | 0.4226 | 0.1471 | -   | 0.3  |
| SPRR1A Cornifin-A                                              | IPI00017987     | 10 kDa  | 4   | 10  | 5   | 4   | 3   | 3   | 7   | 5   | 3   | 0.1279 | 0.3843 | 0.7 | 0.5  |
| SPRR2G Small proline-rich protein 2G                           | IPI00000849     | 8 kDa   | 1   | 2   | 3   | 1   | 1   | 1   | 2   | 2   | 1   | 0.4417 | 0.3292 | 0.5 | 0.7  |
| SPRR3 Small proline-rich protein 3                             | IPI00082931     | 18 kDa  | 7   | 4   | 0   | 2   | 0   | 0   | 6   | 1   | 0   | 0.4226 | 0.0727 | 0.0 | 0.0  |
| SRI Sorcin                                                     | IPI00027175     | 22 kDa  | 4   | 2   | 1   | 4   | 1   | 1   | 3   | 3   | 1   | 0.4297 | 0.1653 | 0.4 | 0.4  |
| ST13 Hsc70-interacting protein                                 | IPI00032826     | 41 kDa  | 2   | 2   | 0   | 1   | 0   | 0   | 2   | 1   | 0   | 0.4226 | 0.0081 | 0.0 | 0.0  |
| ST6GAL1 Beta-galactoside alpha-2,6-sialyltransferase 1         | IPI00013887     | 47 kDa  | 4   | 1   | 2   | 3   | 0   | 0   | 2   | 3   | 0   | 0.0340 | 0.2187 | 0.0 | 0.0  |
| STOM Erythrocyte band 7 integral membrane protein              | IPI00219682     | 32 kDa  | 8   | 9   | 7   | 9   | 4   | 5   | 9   | 8   | 5   | 0.0826 | 0.0217 | 0.6 | 0.6  |
| SULF2 Isoform 1 of Extracellular sulfatase Sulf-2 precursor    | IPI00297252     | 100 kDa | 2   | 1   | 2   | 0   | 0   | 0   | 2   | 1   | 0   | 0.4226 | 0.1357 | 0.0 | 0.0  |
| SUSD2 Sushi domain-containing protein 2 precursor              | IPI00021302     | 90 kDa  | 23  | 19  | 23  | 28  | 6   | 5   | 21  | 26  | 5   | 0.0130 | 0.0146 | 0.2 | 0.3  |
| TAGLN2 Transgelin-2                                            | IPI00550363     | 22 kDa  | 5   | 5   | 2   | 3   | 1   | 1   | 5   | 3   | 1   | 0.0909 | 0.0007 | 0.4 | 0.2  |
| TALDO1 Transaldolase                                           | IPI00744692     | 38 kDa  | 0   | 1   | 7   | 6   | 0   | 0   | 1   | 7   | 0   | 0.0077 | 0.4226 | 0.0 | 0.0  |
| TAOK1 Isoform 1 of Serine/threonine-protein kinase TAO1        | IPI00002232     | 116 kDa | 4   | 6   | 2   | 3   | 6   | 9   | 5   | 3   | 7   | 0.1117 | 0.3696 | 2.7 | 1.5  |
| TBCA Tubulin-specific chaperone A                              | IPI00217236     | 13 kDa  | 4   | 5   | 0   | 4   | 2   | 1   | 4   | 2   | 2   | 0.8586 | 0.0978 | 0.8 | 0.4  |
| TCTN3 Isoform 2 of Tectonic-3 precursor                        | IPI00737059     | 48 kDa  | 2   | 2   | 1   | 0   | 0   | 1   | 2   | 1   | 1   | 0.9932 | 0.1010 | 1.0 | 0.2  |
| TF Serotransferrin precursor                                   | IPI00022463     | 77 kDa  | 428 | 402 | 381 | 390 | 943 | 891 | 415 | 386 | 917 | 0.0025 | 0.0033 | 2.4 | 2.2  |
| TFF1 Trefoil factor 1 precursor                                | IPI00022283     | 9 kDa   | 16  | 14  | 6   | 8   | 17  | 20  | 15  | 7   | 18  | 0.0360 | 0.2240 | 2.5 | 1.2  |
| TFF2 Trefoil factor 2 precursor                                | IPI00010675     | 14 kDa  | 103 | 96  | 52  | 52  | 95  | 105 | 100 | 52  | 100 | 0.0119 | 0.9604 | 1.9 | 1.0  |
| TFF3 trefoil factor 3 precursor                                | IPI00018909     | 14 kDa  | 23  | 35  | 21  | 18  | 32  | 35  | 29  | 19  | 34  | 0.0295 | 0.5308 | 1.7 | 1.2  |
| TGFBR1 TGF-beta receptor type-1 precursor                      | IPI00005733     | 56 kDa  | 7   | 7   | 3   | 1   | 6   | 6   | 7   | 2   | 6   | 0.0806 | 0.1435 | 2.8 | 0.8  |

|                                                                              |             |          |    |    |    |    |    |    |    |    |    |        |        |     |     |
|------------------------------------------------------------------------------|-------------|----------|----|----|----|----|----|----|----|----|----|--------|--------|-----|-----|
| TGM3 Protein-glutamine gamma-glutamyltransferase E precursor                 | IPI00300376 | 77 kDa   | 0  | 0  | 1  | 2  | 0  | 3  | 0  | 2  | 2  | 0.9810 | 0.4226 | 1.0 | -   |
| TGM4 Protein-glutamine gamma-glutamyltransferase 4                           | IPI00290396 | 77 kDa   | 48 | 66 | 15 | 11 | 8  | 3  | 57 | 13 | 5  | 0.1136 | 0.0310 | 0.4 | 0.1 |
| TGOLN2 Isoform TGN51 of Trans-Golgi network integral membrane protein        | IPI00012545 | 51 kDa   | 5  | 6  | 6  | 6  | 14 | 8  | 5  | 6  | 11 | 0.3062 | 0.2510 | 1.7 | 2.0 |
| THBD Thrombomodulin precursor                                                | IPI00010737 | 60 kDa   | 11 | 10 | 12 | 12 | 6  | 9  | 10 | 12 | 7  | 0.0884 | 0.1701 | 0.6 | 0.7 |
| THBS1 Thrombospondin-1 precursor                                             | IPI00296099 | 129 kDa  | 26 | 28 | 24 | 32 | 14 | 9  | 27 | 28 | 11 | 0.0733 | 0.0338 | 0.4 | 0.4 |
| THBS2 Thrombospondin-2 precursor                                             | IPI00018769 | 130 kDa  | 1  | 2  | 0  | 1  | 3  | 3  | 2  | 1  | 3  | 0.0340 | 0.0540 | 6.3 | 2.0 |
| THY1 Thy-1 membrane glycoprotein precursor                                   | IPI00022892 | 18 kDa   | 19 | 16 | 16 | 12 | 20 | 13 | 18 | 14 | 16 | 0.6286 | 0.7743 | 1.2 | 0.9 |
| TIMP1 Metalloproteinase inhibitor 1 precursor                                | IPI00032292 | 23 kDa   | 4  | 1  | 3  | 2  | 2  | 2  | 2  | 3  | 2  | 0.5018 | 0.9323 | 0.8 | 0.9 |
| TIMP2 Metalloproteinase inhibitor 2 precursor                                | IPI00027166 | 24 kDa   | 23 | 12 | 7  | 14 | 6  | 3  | 17 | 11 | 4  | 0.2184 | 0.1418 | 0.4 | 0.3 |
| TINAGL1 Isoform 1 of Tubulointerstitial nephritis antigen-like protein       | IPI00005563 | 52 kDa   | 4  | 5  | 3  | 4  | 6  | 4  | 4  | 4  | 5  | 0.2501 | 0.5837 | 1.3 | 1.1 |
| TLN1 Talin-1                                                                 | IPI00298994 | 270 kDa  | 0  | 0  | 0  | 0  | 2  | 0  | 0  | 0  | 1  | 0.4226 | 0.4226 | -   | -   |
| TMED1 Transmembrane emp24 domain-containing protein 1                        | IPI00009976 | 25 kDa   | 1  | 0  | 3  | 0  | 1  | 0  | 1  | 2  | 1  | 0.5998 | 0.9572 | 0.3 | 0.9 |
| TMED3 Transmembrane emp24 domain-containing protein 3                        | IPI00604599 | 25 kDa   | 1  | 3  | 1  | 2  | 1  | 0  | 2  | 2  | 1  | 0.3075 | 0.2798 | 0.4 | 0.3 |
| TMED7 Transmembrane emp24 domain-containing protein 7                        | IPI00032825 | 25 kDa   | 2  | 2  | 4  | 2  | 3  | 4  | 2  | 3  | 4  | 0.6428 | 0.0961 | 1.2 | 1.7 |
| TMEM106B Transmembrane protein 106B                                          | IPI00395903 | 31 kDa   | 41 | 31 | 22 | 11 | 2  | 6  | 36 | 17 | 4  | 0.1651 | 0.0273 | 0.3 | 0.1 |
| TMEM132A Isoform 1 of Transmembrane protein 132A precursor                   | IPI00301865 | 110 kDa  | 10 | 10 | 6  | 7  | 0  | 0  | 10 | 7  | 0  | 0.0043 | 0.0004 | 0.0 | 0.0 |
| TMEM149 Isoform 1 of Transmembrane protein 149 precursor                     | IPI00002910 | 38 kDa   | 10 | 7  | 2  | 4  | 10 | 8  | 8  | 3  | 9  | 0.0705 | 0.8367 | 2.8 | 1.0 |
| TMSB4X Thymosin beta-4                                                       | IPI00220828 | 5 kDa    | 1  | 2  | 2  | 5  | 2  | 0  | 2  | 4  | 1  | 0.3090 | 0.7114 | 0.3 | 0.7 |
| TNC Isoform 1 of Tenascin precursor                                          | IPI00031008 | 241 kDa  | 5  | 18 | 13 | 13 | 9  | 11 | 11 | 13 | 10 | 0.0855 | 0.8298 | 0.7 | 0.9 |
| TNFRSF12A Isoform 1 of Tumor necrosis factor receptor superfamily member 12A | IPI00010277 | 14 kDa   | 0  | 3  | 2  | 2  | 2  | 2  | 2  | 2  | 2  | 0.1562 | 0.6973 | 1.0 | 1.4 |
| TNFRSF14 Tumor necrosis factor receptor superfamily member 14                | IPI00024331 | 30 kDa   | 10 | 19 | 12 | 7  | 9  | 15 | 14 | 9  | 12 | 0.5838 | 0.7141 | 1.3 | 0.8 |
| TNFRSF17 Tumor necrosis factor receptor superfamily member 17                | IPI00293877 | 20 kDa   | 0  | 2  | 1  | 0  | 0  | 0  | 1  | 1  | 0  | 0.4226 | 0.4226 | 0.0 | 0.0 |
| TNFRSF1B Isoform 1 of Tumor necrosis factor receptor superfamily member 1B   | IPI00023501 | 48 kDa   | 8  | 11 | 11 | 12 | 18 | 24 | 10 | 12 | 21 | 0.1014 | 0.0795 | 1.8 | 2.1 |
| TNFRSF8 Isoform Long of Tumor necrosis factor receptor superfamily member 8  | IPI00006073 | 64 kDa   | 0  | 0  | 1  | 0  | 1  | 2  | 0  | 1  | 2  | 0.2794 | 0.0901 | 3.1 | -   |
| TNXB 456 kDa protein                                                         | IPI00644296 | 456 kDa  | 42 | 53 | 48 | 56 | 28 | 29 | 47 | 52 | 28 | 0.0303 | 0.0745 | 0.5 | 0.6 |
| TPI1 Isoform 1 of Triosephosphate isomerase                                  | IPI00465028 | 31 kDa   | 29 | 27 | 26 | 16 | 7  | 11 | 28 | 21 | 9  | 0.1695 | 0.0134 | 0.4 | 0.3 |
| TPP1 Isoform 1 of Tripeptidyl-peptidase 1 precursor                          | IPI00298237 | 61 kDa   | 32 | 24 | 15 | 16 | 19 | 18 | 28 | 15 | 18 | 0.0158 | 0.1465 | 1.2 | 0.7 |
| TPT1 Tumor protein, translationally-controlled 1                             | IPI00009943 | 22 kDa   | 2  | 2  | 3  | 1  | 0  | 0  | 2  | 2  | 0  | 0.1881 | 0.0081 | 0.0 | 0.0 |
| TRHDE Thyrotropin-releasing hormone-degrading ectoenzyme                     | IPI00007798 | 117 kDa  | 35 | 38 | 33 | 36 | 10 | 12 | 36 | 35 | 11 | 0.0067 | 0.0054 | 0.3 | 0.3 |
| TSG101 Isoform 1 of Tumor susceptibility gene 101 protein                    | IPI00018434 | 44 kDa   | 13 | 12 | 6  | 13 | 9  | 10 | 13 | 10 | 9  | 0.8679 | 0.0444 | 0.9 | 0.7 |
| TSPAN1 Tetraspanin-1                                                         | IPI00030936 | 26 kDa   | 4  | 6  | 7  | 5  | 6  | 5  | 5  | 6  | 5  | 0.5228 | 0.6499 | 0.9 | 1.1 |
| TSTA3 GDP-L-fucose synthetase                                                | IPI00014361 | 36 kDa   | 2  | 0  | 0  | 0  | 0  | 0  | 1  | 0  | 0  | -      | 0.4226 | -   | 0.0 |
| TTN Isoform 2 of Titin                                                       | IPI00023283 | 3806 kDa | 5  | 5  | 8  | 6  | 13 | 10 | 5  | 7  | 11 | 0.1909 | 0.0664 | 1.6 | 2.3 |
| TTR Transthyretin precursor                                                  | IPI00022432 | 16 kDa   | 17 | 13 | 24 | 21 | 10 | 5  | 15 | 23 | 8  | 0.0361 | 0.1333 | 0.3 | 0.5 |
| TUBA1C Tubulin alpha-1C chain                                                | IPI00218343 | 50 kDa   | 4  | 0  | 1  | 0  | 0  | 1  | 2  | 1  | 1  | 0.9932 | 0.5707 | 1.0 | 0.3 |
| TUBB2C Tubulin beta-2C chain                                                 | IPI00007752 | 50 kDa   | 6  | 2  | 4  | 2  | 0  | 4  | 4  | 3  | 2  | 0.7162 | 0.5925 | 0.7 | 0.5 |
| TWSG1 Isoform 1 of Twisted gastrulation protein homolog                      | IPI00410487 | 25 kDa   | 4  | 3  | 2  | 3  | 8  | 9  | 3  | 3  | 8  | 0.0141 | 0.0119 | 3.1 | 2.5 |
| TXN Thioredoxin                                                              | IPI00216298 | 12 kDa   | 6  | 5  | 4  | 6  | 2  | 4  | 5  | 5  | 3  | 0.3034 | 0.1917 | 0.6 | 0.6 |
| TXNDC17 Thioredoxin domain-containing protein 17                             | IPI00646689 | 14 kDa   | 1  | 2  | 2  | 2  | 1  | 0  | 2  | 2  | 1  | 0.1071 | 0.2630 | 0.3 | 0.3 |
| TXNDC5;MUTED Thioredoxin domain-containing protein 5                         | IPI00171438 | 48 kDa   | 11 | 11 | 11 | 8  | 2  | 3  | 11 | 9  | 3  | 0.0334 | 0.0040 | 0.3 | 0.2 |
| TYRO3 Tyrosine-protein kinase receptor TYRO3 precursor                       | IPI00030887 | 97 kDa   | 2  | 0  | 1  | 0  | 0  | 3  | 1  | 1  | 2  | 0.5890 | 0.8566 | 3.0 | 1.3 |
| UBA1 Ubiquitin-like modifier-activating enzyme 1                             | IPI00645078 | 118 kDa  | 6  | 8  | 3  | 4  | 0  | 1  | 7  | 4  | 1  | 0.0495 | 0.0296 | 0.1 | 0.1 |
| UBE2D2 Ubiquitin-conjugating enzyme E2D 2 isoform 2                          | IPI00019932 | 14 kDa   | 0  | 2  | 1  | 0  | 0  | 0  | 1  | 1  | 0  | 0.4226 | 0.4226 | 0.0 | 0.0 |
| UBE2L3 Ubiquitin-conjugating enzyme E2 L3                                    | IPI00021347 | 18 kDa   | 1  | 2  | 1  | 4  | 0  | 0  | 2  | 3  | 0  | 0.2336 | 0.0574 | 0.0 | 0.0 |
| UBE2N Ubiquitin-conjugating enzyme E2 N                                      | IPI00003949 | 17 kDa   | 2  | 7  | 1  | 0  | 1  | 1  | 5  | 1  | 1  | 0.4030 | 0.2570 | 2.1 | 0.2 |
| UBE2V1;TMEM189-UBE2V1 Isoform 1 of Ubiquitin-conjugating enzyme E2 V1        | IPI00019599 | 26 kDa   | 4  | 1  | 1  | 0  | 2  | 0  | 2  | 1  | 1  | 0.6862 | 0.5544 | 2.1 | 0.5 |
| UCHL1 Ubiquitin carboxyl-terminal hydrolase isozyme L1                       | IPI00018352 | 25 kDa   | 2  | 5  | 2  | 2  | 0  | 0  | 4  | 2  | 0  | 0.0001 | 0.1046 | 0.0 | 0.0 |

|                                                           |             |         |      |      |      |      |      |      |      |      |      |        |        |     |     |
|-----------------------------------------------------------|-------------|---------|------|------|------|------|------|------|------|------|------|--------|--------|-----|-----|
| UEVLD Isoform 1 of Ubiquitin-conjugating enzyme E2 varia  | IPI00746183 | 52 kDa  | 1    | 4    | 3    | 2    | 3    | 5    | 3    | 3    | 4    | 0.2819 | 0.4239 | 1.7 | 1.7 |
| UMOD Isoform 1 of Uromodulin precursor                    | IPI00013945 | 70 kDa  | 1724 | 1921 | 1712 | 1938 | 1693 | 1907 | 1823 | 1825 | 1800 | 0.8856 | 0.8904 | 1.0 | 1.0 |
| UNC5C Isoform 1 of Netrin receptor UNC5C precursor        | IPI00293757 | 103 kDa | 0    | 0    | 4    | 0    | 4    | 2    | 0    | 2    | 3    | 0.6775 | 0.1009 | 1.5 | -   |
| UPK2 Uroplakin-2 precursor                                | IPI00012113 | 19 kDa  | 4    | 2    | 0    | 4    | 2    | 4    | 3    | 2    | 3    | 0.6624 | 0.7657 | 1.6 | 1.2 |
| VAMP8 Vesicle-associated membrane protein 8               | IPI00030911 | 11 kDa  | 1    | 3    | 1    | 0    | 0    | 0    | 2    | 1    | 0    | 0.4226 | 0.1450 | 0.0 | 0.0 |
| VASN Vasorin precursor                                    | IPI00395488 | 72 kDa  | 139  | 153  | 145  | 146  | 133  | 126  | 146  | 146  | 129  | 0.0510 | 0.1697 | 0.9 | 0.9 |
| VAT1 Synaptic vesicle membrane protein VAT-1 homolog      | IPI00156689 | 42 kDa  | 0    | 2    | 0    | 0    | 0    | 0    | 1    | 0    | 0    | -      | 0.4226 | -   | 0.0 |
| VCAM1 Isoform 1 of Vascular cell adhesion protein 1 precu | IPI00018136 | 81 kDa  | 30   | 24   | 28   | 26   | 65   | 42   | 27   | 27   | 53   | 0.1472 | 0.1569 | 2.0 | 2.0 |
| VCAN Isoform V0 of Versican core protein precursor        | IPI00009802 | 373 kDa | 16   | 16   | 11   | 10   | 7    | 9    | 16   | 10   | 8    | 0.1026 | 0.0150 | 0.7 | 0.5 |
| VCL Isoform 1 of Vinculin                                 | IPI00291175 | 117 kDa | 11   | 17   | 7    | 6    | 0    | 2    | 14   | 7    | 1    | 0.0430 | 0.0598 | 0.2 | 0.1 |
| VDAC1 Voltage-dependent anion-selective channel protei    | IPI00216308 | 31 kDa  | 4    | 3    | 1    | 0    | 0    | 0    | 3    | 1    | 0    | 0.4226 | 0.0081 | 0.0 | 0.0 |
| VIL1 Villin-1                                             | IPI00218852 | 93 kDa  | 0    | 0    | 5    | 6    | 0    | 0    | 0    | 6    | 0    | 0.0063 | -      | 0.0 | -   |
| VIM Vimentin                                              | IPI00418471 | 54 kDa  | 0    | 0    | 19   | 6    | 0    | 0    | 0    | 13   | 0    | 0.1881 | -      | 0.0 | -   |
| VMO1 Vitelline membrane outer layer protein 1 homolog     | IPI00216914 | 22 kDa  | 58   | 68   | 39   | 52   | 12   | 16   | 63   | 45   | 14   | 0.0415 | 0.0130 | 0.3 | 0.2 |
| VNN1 Pantetheinase precursor                              | IPI00030871 | 57 kDa  | 19   | 20   | 16   | 16   | 21   | 21   | 20   | 16   | 21   | 0.0037 | 0.0846 | 1.3 | 1.1 |
| VPS25 Vacuolar protein-sorting-associated protein 25      | IPI00031655 | 21 kDa  | 2    | 2    | 0    | 1    | 0    | 0    | 2    | 1    | 0    | 0.4226 | 0.0081 | 0.0 | 0.0 |
| VPS28 Vacuolar protein sorting-associated protein 28 hom  | IPI00007155 | 25 kDa  | 10   | 6    | 4    | 10   | 3    | 2    | 8    | 7    | 3    | 0.2797 | 0.1150 | 0.4 | 0.3 |
| VPS37B Vacuolar protein sorting-associated protein 37B    | IPI00002926 | 31 kDa  | 1    | 3    | 3    | 0    | 2    | 4    | 2    | 2    | 3    | 0.4751 | 0.4933 | 2.0 | 1.5 |
| VPS37D Vacuolar protein sorting-associated protein 37D    | IPI00374354 | 40 kDa  | 1    | 2    | 1    | 0    | 0    | 0    | 2    | 1    | 0    | 0.4226 | 0.0574 | 0.0 | 0.0 |
| VPS4A Vacuolar protein sorting-associating protein 4A     | IPI00411356 | 49 kDa  | 4    | 6    | 0    | 2    | 4    | 1    | 5    | 1    | 3    | 0.4767 | 0.4210 | 2.6 | 0.6 |
| VPS4B Vacuolar protein sorting-associating protein 4B     | IPI00182728 | 49 kDa  | 7    | 5    | 5    | 3    | 3    | 2    | 6    | 4    | 3    | 0.3551 | 0.1127 | 0.6 | 0.4 |
| VSIG4 Isoform 1 of V-set and immunoglobulin domain-coni   | IPI00027038 | 44 kDa  | 1    | 5    | 5    | 9    | 10   | 8    | 3    | 7    | 9    | 0.6097 | 0.1297 | 1.2 | 2.8 |
| VSIG8 Isoform 1 of V-set and immunoglobulin domain-coni   | IPI00376274 | 44 kDa  | 0    | 0    | 0    | 0    | 0    | 12   | 0    | 0    | 6    | 0.4226 | 0.4226 | -   | -   |
| VTA1 Vacuolar protein sorting-associated protein VTA1 hoi | IPI00017160 | 34 kDa  | 12   | 7    | 11   | 8    | 10   | 5    | 9    | 9    | 8    | 0.5524 | 0.6366 | 0.8 | 0.8 |
| VTN Vitronectin precursor                                 | IPI00298971 | 54 kDa  | 52   | 55   | 35   | 41   | 48   | 39   | 53   | 38   | 44   | 0.4574 | 0.2005 | 1.1 | 0.8 |
| VWA1 Isoform 1 of von Willebrand factor A domain-contai   | IPI00396383 | 47 kDa  | 1    | 0    | 0    | 2    | 0    | 0    | 1    | 1    | 0    | 0.4226 | 0.4226 | 0.0 | 0.0 |
| VWF von Willebrand factor precursor                       | IPI00023014 | 309 kDa | 6    | 10   | 4    | 5    | 2    | 4    | 8    | 5    | 3    | 0.3314 | 0.1703 | 0.7 | 0.4 |
| WBP2 WW domain-binding protein 2                          | IPI00032050 | 28 kDa  | 0    | 2    | 1    | 2    | 0    | 0    | 1    | 2    | 0    | 0.0905 | 0.4226 | 0.0 | 0.0 |
| WDR1 Isoform 2 of WD repeat-containing protein 1          | IPI00216256 | 58 kDa  | 2    | 1    | 0    | 2    | 0    | 1    | 2    | 1    | 1    | 0.7106 | 0.3180 | 0.5 | 0.3 |
| WFDC2 Isoform 1 of WAP four-disulfide core domain prote   | IPI00291488 | 13 kDa  | 98   | 110  | 59   | 62   | 86   | 90   | 104  | 61   | 88   | 0.0089 | 0.1221 | 1.4 | 0.8 |
| WISP2 WNT1-inducible-signaling pathway protein 2 precu    | IPI00022052 | 27 kDa  | 13   | 10   | 14   | 18   | 14   | 28   | 12   | 16   | 21   | 0.5231 | 0.3065 | 1.3 | 1.8 |
| XPNPEP2 Xaa-Pro aminopeptidase 2 precursor                | IPI00439344 | 76 kDa  | 7    | 14   | 6    | 7    | 3    | 2    | 11   | 7    | 3    | 0.0306 | 0.1501 | 0.4 | 0.3 |
| YES1 Proto-oncogene tyrosine-protein kinase Yes           | IPI00013981 | 61 kDa  | 2    | 2    | 1    | 1    | 0    | 1    | 2    | 1    | 1    | 0.4421 | 0.1010 | 0.5 | 0.2 |
| YWHAB Isoform Long of 14-3-3 protein beta/alpha           | IPI00216318 | 28 kDa  | 8    | 7    | 7    | 6    | 0    | 1    | 8    | 7    | 1    | 0.0161 | 0.0147 | 0.1 | 0.1 |
| YWHAE 14-3-3 protein epsilon                              | IPI00000816 | 29 kDa  | 16   | 14   | 5    | 7    | 7    | 1    | 15   | 6    | 4    | 0.4938 | 0.0625 | 0.6 | 0.3 |
| YWHAG 14-3-3 protein gamma                                | IPI00220642 | 28 kDa  | 8    | 9    | 5    | 9    | 0    | 0    | 9    | 7    | 0    | 0.0681 | 0.0012 | 0.0 | 0.0 |
| YWHAQ 14-3-3 protein theta                                | IPI00018146 | 28 kDa  | 6    | 4    | 3    | 4    | 0    | 0    | 5    | 4    | 0    | 0.0169 | 0.0376 | 0.0 | 0.0 |
| YWHAZ 14-3-3 protein zeta/delta                           | IPI00021263 | 28 kDa  | 13   | 14   | 7    | 11   | 8    | 2    | 14   | 9    | 5    | 0.3203 | 0.0908 | 0.5 | 0.4 |
| ZNF749;RNASE2;HLA-DRB1;HLA-DRB4;LOC100133583;LOC:         | IPI00019449 | 18 kDa  | 183  | 148  | 163  | 171  | 186  | 222  | 166  | 167  | 204  | 0.1832 | 0.2695 | 1.2 | 1.2 |
|                                                           | IPI00387120 | 13 kDa  | 43   | 41   | 43   | 40   | 61   | 55   | 42   | 42   | 58   | 0.0404 | 0.0371 | 1.4 | 1.4 |
|                                                           | IPI00783287 | 13 kDa  | 94   | 93   | 92   | 120  | 80   | 69   | 93   | 106  | 75   | 0.1722 | 0.0842 | 0.7 | 0.8 |
|                                                           | IPI00829956 | 13 kDa  | 29   | 29   | 24   | 28   | 33   | 19   | 29   | 26   | 26   | 0.9989 | 0.7293 | 1.0 | 0.9 |
|                                                           | IPI00387106 | 12 kDa  | 14   | 15   | 12   | 14   | 13   | 8    | 15   | 13   | 10   | 0.4836 | 0.2690 | 0.8 | 0.7 |
|                                                           | IPI00398220 | 12 kDa  | 22   | 28   | 8    | 8    | 23   | 9    | 25   | 8    | 16   | 0.4117 | 0.3768 | 1.9 | 0.6 |
|                                                           | IPI00816799 | 13 kDa  | 18   | 21   | 18   | 19   | 21   | 16   | 19   | 18   | 19   | 0.9461 | 0.7607 | 1.0 | 0.9 |
|                                                           | IPI00385253 | 14 kDa  | 14   | 15   | 14   | 9    | 26   | 18   | 15   | 12   | 22   | 0.1460 | 0.2030 | 1.9 | 1.5 |
|                                                           | IPI00876888 | 52 kDa  | 324  | 317  | 412  | 407  | 318  | 283  | 320  | 409  | 301  | 0.0249 | 0.3803 | 0.7 | 0.9 |

|             |        |     |     |     |     |     |     |     |     |     |        |        |     |     |
|-------------|--------|-----|-----|-----|-----|-----|-----|-----|-----|-----|--------|--------|-----|-----|
| IPI00890703 | 12 kDa | 10  | 13  | 12  | 10  | 11  | 13  | 11  | 11  | 12  | 0.4961 | 0.7713 | 1.1 | 1.1 |
| IPI00735451 | 13 kDa | 7   | 6   | 7   | 12  | 9   | 10  | 7   | 10  | 9   | 0.8125 | 0.0698 | 0.9 | 1.4 |
| IPI00384404 | 13 kDa | 19  | 31  | 34  | 61  | 37  | 31  | 25  | 47  | 34  | 0.4436 | 0.3037 | 0.7 | 1.4 |
| IPI00883855 | 12 kDa | 17  | 30  | 20  | 46  | 31  | 25  | 23  | 33  | 28  | 0.7348 | 0.6104 | 0.8 | 1.2 |
| IPI00387101 | 12 kDa | 18  | 28  | 13  | 14  | 26  | 6   | 23  | 14  | 16  | 0.8047 | 0.6160 | 1.2 | 0.7 |
| IPI00387113 | 12 kDa | 8   | 5   | 10  | 9   | 13  | 5   | 7   | 9   | 9   | 0.9750 | 0.6059 | 1.0 | 1.4 |
| IPI00387025 | 12 kDa | 5   | 7   | 5   | 5   | 6   | 10  | 6   | 5   | 8   | 0.3767 | 0.5487 | 1.4 | 1.3 |
| IPI00387116 | 11 kDa | 12  | 9   | 14  | 11  | 22  | 14  | 10  | 13  | 18  | 0.3268 | 0.2234 | 1.4 | 1.7 |
| IPI00784519 | 25 kDa | 180 | 150 | 162 | 159 | 235 | 246 | 165 | 161 | 241 | 0.0044 | 0.0409 | 1.5 | 1.5 |
| IPI00384402 | 12 kDa | 12  | 11  | 13  | 10  | 18  | 14  | 11  | 12  | 16  | 0.1895 | 0.1516 | 1.4 | 1.4 |
| IPI00896424 | 9 kDa  | 6   | 5   | 3   | 3   | 2   | 2   | 5   | 3   | 2   | 0.0021 | 0.0217 | 0.7 | 0.4 |
| IPI00827580 | 12 kDa | 5   | 4   | 4   | 3   | 2   | 2   | 4   | 4   | 2   | 0.1180 | 0.0307 | 0.6 | 0.5 |
| IPI00827839 | 12 kDa | 5   | 10  | 10  | 11  | 15  | 8   | 7   | 10  | 11  | 0.8282 | 0.4807 | 1.1 | 1.5 |
| IPI00827876 | 14 kDa | 14  | 0   | 14  | 38  | 25  | 21  | 7   | 26  | 23  | 0.8509 | 0.1616 | 0.9 | 3.3 |
| IPI00890733 | 11 kDa | 6   | 3   | 1   | 2   | 3   | 4   | 4   | 2   | 4   | 0.0877 | 0.7006 | 2.4 | 0.8 |
| IPI00453476 | 29 kDa | 7   | 4   | 1   | 3   | 1   | 0   | 6   | 2   | 1   | 0.3180 | 0.0961 | 0.3 | 0.1 |
| IPI00382436 | 11 kDa | 0   | 6   | 3   | 2   | 12  | 14  | 3   | 3   | 13  | 0.0106 | 0.0856 | 5.0 | 4.3 |
| IPI00827939 | 12 kDa | 7   | 4   | 2   | 4   | 9   | 8   | 6   | 3   | 8   | 0.0524 | 0.2752 | 2.6 | 1.5 |
| IPI00387109 | 13 kDa | 2   | 3   | 0   | 2   | 3   | 3   | 3   | 1   | 3   | 0.1648 | 0.2056 | 3.1 | 1.2 |
| IPI00387100 | 12 kDa | 19  | 25  | 0   | 5   | 22  | 3   | 22  | 3   | 13  | 0.4117 | 0.4368 | 4.9 | 0.6 |
| IPI00386131 | 14 kDa | 1   | 4   | 4   | 6   | 4   | 0   | 3   | 5   | 2   | 0.3367 | 0.8925 | 0.4 | 0.8 |
| IPI00384399 | 11 kDa | 2   | 3   | 1   | 2   | 2   | 0   | 3   | 2   | 1   | 0.7382 | 0.2961 | 0.7 | 0.4 |
| IPI00383717 | 24 kDa | 0   | 51  | 0   | 0   | 105 | 86  | 26  | 0   | 95  | 0.0095 | 0.1241 | -   | 3.7 |
| IPI00387095 | 12 kDa | 5   | 3   | 0   | 0   | 1   | 2   | 4   | 0   | 2   | 0.0901 | 0.1601 | -   | 0.4 |
| IPI00830035 | 13 kDa | 0   | 0   | 5   | 3   | 0   | 0   | 0   | 4   | 0   | 0.0617 | -      | 0.0 | -   |
| IPI00382539 | 14 kDa | 0   | 0   | 1   | 1   | 3   | 0   | 0   | 1   | 2   | 0.7498 | 0.4226 | 1.6 | -   |
| IPI00642632 | 11 kDa | 42  | 35  | 0   | 0   | 0   | 0   | 38  | 0   | 0   | -      | 0.0081 | -   | 0.0 |

**FEMALE**

| Protein Name                                           | Accession Number | Molecular Weight | H   |     |    |    |       |       |         |      | t-test |            | PDAC/H | PDAC/CP |             |
|--------------------------------------------------------|------------------|------------------|-----|-----|----|----|-------|-------|---------|------|--------|------------|--------|---------|-------------|
|                                                        |                  |                  | CP1 | CP2 | H1 | H2 | PDAC1 | PDAC2 | CP Mean | Mean | Mean   | PDAC vs. H |        |         | PDAC vs. CP |
| - 22 kDa protein                                       | IPI00219910      | 22 kDa           | 3   | 3   | 0  | 0  | 0     | 0     | 3       | 0    | 0      | -          | 0.0049 | -       | 0.0         |
| - 54 kDa protein                                       | IPI00375601      | 54 kDa           | 0   | 3   | 0  | 0  | 4     | 2     | 2       | 0    | 3      | 0.0468     | 0.5512 | -       | 1.8         |
| - 55 kDa protein                                       | IPI00029863      | 55 kDa           | 19  | 21  | 12 | 11 | 6     | 5     | 20      | 11   | 5      | 0.0196     | 0.0062 | 0.5     | 0.3         |
| cDNA FLD77778                                          | IPI00876888      | 52 kDa           | 340 | 339 | 0  | 0  | 437   | 441   | 339     | 0    | 439    | 0.0000     | 0.0005 | -       | 1.3         |
| - Cold agglutinin FS-1 L-chain (Fragment)              | IPI00827773      | 12 kDa           | 0   | 33  | 0  | 0  | 36    | 0     | 17      | 0    | 18     | 0.4226     | 0.9617 | -       | 1.1         |
| - REV25-2 (Fragment)                                   | IPI00816794      | 15 kDa           | 8   | 8   | 0  | 0  | 0     | 7     | 8       | 0    | 4      | 0.4226     | 0.3334 | -       | 0.4         |
| A1BG Alpha-1B-glycoprotein                             | IPI00022895      | 54 kDa           | 123 | 123 | 42 | 26 | 195   | 200   | 123     | 34   | 198    | 0.0025     | 0.0009 | 5.8     | 1.6         |
| A2LD1 AIG2-like domain-containing protein 1            | IPI00900332      | 17 kDa           | 4   | 5   | 0  | 0  | 0     | 0     | 4       | 0    | 0      | -          | 0.0049 | -       | 0.0         |
| A2M Alpha-2-macroglobulin                              | IPI00478003      | 163 kDa          | 54  | 37  | 49 | 39 | 31    | 24    | 45      | 44   | 27     | 0.1053     | 0.1929 | 0.6     | 0.6         |
| A2ML1 Alpha-2-macroglobulin-like protein 1             | IPI00419215      | 161 kDa          | 19  | 29  | 24 | 0  | 9     | 0     | 24      | 12   | 4      | 0.6070     | 0.0964 | 0.4     | 0.2         |
| ABCB1 Multidrug resistance protein 1                   | IPI00027481      | 141 kDa          | 52  | 48  | 20 | 16 | 42    | 48    | 50      | 18   | 45     | 0.0161     | 0.3111 | 2.5     | 0.9         |
| ABHD14B Isoform 1 of Abhydrolase domain-containing prc | IPI00063827      | 22 kDa           | 16  | 18  | 5  | 4  | 9     | 15    | 17      | 4    | 12     | 0.1484     | 0.2816 | 2.8     | 0.7         |
| ABHD6;LOC643635;CAPS calcyphosine isoform b            | IPI00103067      | 27 kDa           | 2   | 6   | 0  | 0  | 0     | 0     | 4       | 0    | 0      | -          | 0.1751 | -       | 0.0         |
| ACAN aggrecan isoform 2 precursor                      | IPI00027377      | 250 kDa          | 44  | 30  | 31 | 18 | 27    | 14    | 37      | 24   | 21     | 0.7327     | 0.2346 | 0.8     | 0.6         |
| ACE Isoform Somatic-1 of Angiotensin-converting enzyme | IPI00437751      | 150 kDa          | 37  | 28  | 0  | 0  | 9     | 13    | 32      | 0    | 11     | 0.0370     | 0.0530 | -       | 0.3         |
| ACE2 Isoform 1 of Angiotensin-converting enzyme 2      | IPI00465187      | 92 kDa           | 12  | 0   | 0  | 0  | 0     | 0     | 6       | 0    | 0      | -          | 0.4226 | -       | 0.0         |



|                                                           |             |         |      |      |      |      |      |      |      |      |      |        |        |     |     |
|-----------------------------------------------------------|-------------|---------|------|------|------|------|------|------|------|------|------|--------|--------|-----|-----|
| ACP2 Lysosomal acid phosphatase                           | IPI00003807 | 48 kDa  | 57   | 59   | 23   | 33   | 61   | 56   | 58   | 28   | 58   | 0.0310 | 0.9061 | 2.1 | 1.0 |
| ACPP Isoform 2 of Prostatic acid phosphatase              | IPI00289983 | 48 kDa  | 60   | 69   | 41   | 38   | 15   | 12   | 65   | 39   | 13   | 0.0056 | 0.0087 | 0.3 | 0.2 |
| ACTG1 Actin, cytoplasmic 2                                | IPI00021440 | 42 kDa  | 143  | 139  | 337  | 372  | 82   | 106  | 141  | 354  | 94   | 0.0066 | 0.0622 | 0.3 | 0.7 |
| ACTN1 Alpha-actinin-1                                     | IPI00013508 | 103 kDa | 0    | 0    | 49   | 27   | 0    | 0    | 0    | 38   | 0    | 0.0711 | -      | 0.0 | -   |
| ACTN4 Alpha-actinin-4                                     | IPI00013808 | 105 kDa | 27   | 25   | 54   | 33   | 26   | 6    | 26   | 44   | 16   | 0.2046 | 0.4219 | 0.4 | 0.6 |
| ACTR2 Actin-related protein 2                             | IPI00005159 | 45 kDa  | 0    | 0    | 6    | 12   | 0    | 0    | 0    | 9    | 0    | 0.1080 | -      | 0.0 | -   |
| ACTR3 Actin-related protein 3                             | IPI00028091 | 47 kDa  | 3    | 3    | 6    | 0    | 0    | 0    | 3    | 3    | 0    | 0.4226 | 0.0049 | 0.0 | 0.0 |
| ACVR1B Isoform 1 of Activin receptor type-1B              | IPI00005732 | 57 kDa  | 15   | 18   | 17   | 19   | 15   | 13   | 17   | 18   | 14   | 0.0802 | 0.2966 | 0.8 | 0.8 |
| ACY1 cDNA FLJ60317, highly similar to Aminoacylase-1      | IPI00009268 | 56 kDa  | 16   | 17   | 0    | 0    | 5    | 4    | 17   | 0    | 4    | 0.0270 | 0.0059 | -   | 0.3 |
| ACY3 Aspartoacylase-2                                     | IPI00063025 | 35 kDa  | 2    | 2    | 0    | 0    | 0    | 0    | 2    | 0    | 0    | -      | 0.0049 | -   | 0.0 |
| ADAMTSL2 ADAMTS-like protein 2                            | IPI00644346 | 105 kDa | 9    | 3    | 8    | 4    | 5    | 0    | 6    | 6    | 2    | 0.3764 | 0.4210 | 0.4 | 0.4 |
| AFM Afamin                                                | IPI00019943 | 69 kDa  | 26   | 40   | 27   | 20   | 109  | 85   | 33   | 24   | 97   | 0.0278 | 0.0452 | 4.1 | 2.9 |
| AGA N(4)-(beta-N-acetylglucosaminy)-L-asparaginase        | IPI00026259 | 37 kDa  | 15   | 12   | 9    | 12   | 12   | 18   | 13   | 11   | 15   | 0.2909 | 0.6228 | 1.4 | 1.1 |
| AGRN Agrin                                                | IPI00374563 | 215 kDa | 114  | 84   | 38   | 34   | 58   | 63   | 99   | 36   | 61   | 0.0143 | 0.1256 | 1.7 | 0.6 |
| AGT Angiotensinogen                                       | IPI00032220 | 53 kDa  | 21   | 21   | 0    | 0    | 6    | 7    | 21   | 0    | 7    | 0.0043 | 0.0010 | -   | 0.3 |
| AHCY Adenosylhomocysteinase                               | IPI00012007 | 48 kDa  | 9    | 12   | 0    | 0    | 0    | 0    | 10   | 0    | 0    | -      | 0.0147 | -   | 0.0 |
| AHNAK Neuroblast differentiation-associated protein AHN   | IPI00021812 | 629 kDa | 39   | 23   | 105  | 57   | 0    | 0    | 31   | 81   | 0    | 0.0777 | 0.0603 | 0.0 | 0.0 |
| AHSG Alpha-2-HS-glycoprotein                              | IPI00022431 | 39 kDa  | 185  | 194  | 169  | 176  | 170  | 156  | 189  | 172  | 163  | 0.3671 | 0.0891 | 0.9 | 0.9 |
| AIF1L Isoform 1 of Ionized calcium-binding adapter molecu | IPI00034205 | 17 kDa  | 3    | 5    | 0    | 3    | 0    | 0    | 4    | 1    | 0    | 0.4226 | 0.0419 | 0.0 | 0.0 |
| AKR1A1 Alcohol dehydrogenase [NADP+]                      | IPI00220271 | 37 kDa  | 10   | 3    | 0    | 0    | 0    | 0    | 7    | 0    | 0    | -      | 0.1761 | -   | 0.0 |
| AKR1B1 Aldose reductase                                   | IPI00413641 | 36 kDa  | 13   | 12   | 7    | 4    | 4    | 6    | 12   | 6    | 5    | 0.7364 | 0.0300 | 0.9 | 0.4 |
| AKR1B10 Aldo-keto reductase family 1 member B10           | IPI00105407 | 36 kDa  | 0    | 2    | 0    | 0    | 0    | 0    | 1    | 0    | 0    | -      | 0.4226 | -   | 0.0 |
| ALB Isoform 1 of Serum albumin                            | IPI00745872 | 69 kDa  | 3400 | 3941 | 4296 | 4207 | 3336 | 3336 | 3670 | 4251 | 3336 | 0.0024 | 0.3415 | 0.8 | 0.9 |
| ALCAM Isoform 1 of CD166 antigen                          | IPI00015102 | 65 kDa  | 0    | 0    | 0    | 0    | 14   | 13   | 0    | 0    | 13   | 0.0006 | 0.0006 | -   | -   |
| ALDH1A1 Retinal dehydrogenase 1                           | IPI00218914 | 55 kDa  | 9    | 12   | 3    | 0    | 2    | 7    | 10   | 2    | 5    | 0.4007 | 0.1725 | 2.8 | 0.5 |
| ALDH7A1 aldehyde dehydrogenase 7 family, member A1        | IPI00221234 | 58 kDa  | 3    | 0    | 0    | 0    | 0    | 2    | 2    | 0    | 1    | 0.4226 | 0.8831 | -   | 0.8 |
| ALDH9A1 aldehyde dehydrogenase 9A1                        | IPI00479877 | 56 kDa  | 4    | 2    | 0    | 0    | 0    | 0    | 3    | 0    | 0    | -      | 0.0654 | -   | 0.0 |
| ALDOA Fructose-bisphosphate aldolase A                    | IPI00465439 | 39 kDa  | 14   | 7    | 35   | 33   | 2    | 7    | 10   | 34   | 5    | 0.0075 | 0.3121 | 0.1 | 0.5 |
| ALDOB Fructose-bisphosphate aldolase B                    | IPI00218407 | 39 kDa  | 51   | 35   | 22   | 18   | 11   | 15   | 43   | 20   | 13   | 0.1595 | 0.0737 | 0.7 | 0.3 |
| ALPI Intestinal alkaline phosphatase                      | IPI00298622 | 57 kDa  | 0    | 0    | 0    | 0    | 6    | 6    | 0    | 0    | 6    | 0.0006 | 0.0006 | -   | -   |
| AMBP Protein AMBP                                         | IPI00022426 | 39 kDa  | 1683 | 1879 | 788  | 998  | 2611 | 3035 | 1781 | 893  | 2823 | 0.0147 | 0.0467 | 3.2 | 1.6 |
| AMY1A;AMY1C;AMY2A;AMY1B Alpha-amylase 1                   | IPI00300786 | 58 kDa  | 548  | 521  | 215  | 0    | 403  | 398  | 534  | 108  | 401  | 0.1127 | 0.0106 | 3.7 | 0.7 |
| AMY1A;AMY1C;AMY2A;AMY1B Pancreatic alpha-amylase          | IPI00025476 | 58 kDa  | 644  | 617  | 250  | 223  | 454  | 454  | 631  | 237  | 454  | 0.0038 | 0.0056 | 1.9 | 0.7 |
| AMY2B Alpha-amylase 2B                                    | IPI00021447 | 58 kDa  | 548  | 529  | 0    | 189  | 391  | 392  | 538  | 95   | 391  | 0.0884 | 0.0043 | 4.1 | 0.7 |
| ANG Angiogenin                                            | IPI00008554 | 17 kDa  | 0    | 7    | 0    | 5    | 0    | 0    | 3    | 3    | 0    | 0.4226 | 0.4226 | 0.0 | 0.0 |
| ANGPTL2 Angiopoietin-related protein 2                    | IPI00007800 | 57 kDa  | 24   | 30   | 28   | 26   | 11   | 22   | 27   | 27   | 17   | 0.2221 | 0.2522 | 0.6 | 0.6 |
| ANPEP Aminopeptidase N                                    | IPI00221224 | 110 kDa | 373  | 377  | 117  | 101  | 256  | 228  | 375  | 109  | 242  | 0.0144 | 0.0112 | 2.2 | 0.6 |
| Anti-mucin1 light chain variable region (Fragment)        | IPI00827906 | 12 kDa  | 0    | 0    | 3    | 3    | 6    | 0    | 0    | 3    | 3    | 0.9975 | 0.4226 | 1.0 | -   |
| ANTXR1 Isoform 1 of Anthrax toxin receptor 1              | IPI00030431 | 63 kDa  | 8    | 0    | 0    | 0    | 12   | 14   | 4    | 0    | 13   | 0.0043 | 0.1508 | -   | 3.3 |
| ANXA1 Annexin A1                                          | IPI00218918 | 39 kDa  | 70   | 62   | 184  | 246  | 12   | 25   | 66   | 215  | 19   | 0.0252 | 0.0230 | 0.1 | 0.3 |
| ANXA11 Annexin A11                                        | IPI00414320 | 54 kDa  | 28   | 17   | 32   | 0    | 16   | 15   | 23   | 16   | 16   | 0.9808 | 0.3295 | 1.0 | 0.7 |
| ANXA2 Annexin A2                                          | IPI00455315 | 39 kDa  | 53   | 55   | 131  | 153  | 20   | 24   | 54   | 142  | 22   | 0.0083 | 0.0046 | 0.2 | 0.4 |
| ANXA3 Annexin A3                                          | IPI00024095 | 36 kDa  | 2    | 0    | 30   | 35   | 0    | 0    | 1    | 33   | 0    | 0.0065 | 0.4226 | 0.0 | 0.0 |
| ANXA4 annexin IV                                          | IPI00793199 | 36 kDa  | 8    | 8    | 8    | 15   | 0    | 0    | 8    | 12   | 0    | 0.0784 | 0.0000 | 0.0 | 0.0 |
| ANXA5 Annexin A5                                          | IPI00329801 | 36 kDa  | 7    | 3    | 15   | 12   | 0    | 0    | 5    | 14   | 0    | 0.0103 | 0.0983 | 0.0 | 0.0 |
| ANXA6 annexin VI isoform 2                                | IPI00002459 | 75 kDa  | 8    | 6    | 5    | 0    | 4    | 4    | 7    | 2    | 4    | 0.6256 | 0.1022 | 1.6 | 0.5 |
| ANXA7 cDNA, FLJ92798, highly similar to Homo sapiens ani  | IPI00002460 | 53 kDa  | 7    | 9    | 7    | 8    | 4    | 5    | 8    | 8    | 4    | 0.0519 | 0.0857 | 0.6 | 0.5 |

|                                                                         |             |         |     |     |     |     |     |     |     |     |     |        |        |     |     |
|-------------------------------------------------------------------------|-------------|---------|-----|-----|-----|-----|-----|-----|-----|-----|-----|--------|--------|-----|-----|
| AOX1 Aldehyde oxidase                                                   | IPI00029715 | 148 kDa | 4   | 0   | 0   | 0   | 0   | 0   | 2   | 0   | 0   | -      | 0.4226 | -   | 0.0 |
| APCS Serum amyloid P-component                                          | IPI00022391 | 25 kDa  | 13  | 8   | 3   | 3   | 0   | 2   | 11  | 3   | 1   | 0.2623 | 0.0760 | 0.4 | 0.1 |
| APEH Acylamino-acid-releasing enzyme                                    | IPI00337741 | 81 kDa  | 0   | 0   | 0   | 0   | 4   | 4   | 0   | 0   | 4   | 0.0006 | 0.0006 | -   | -   |
| APLP2 Isoform 1 of Amyloid-like protein 2                               | IPI00031030 | 87 kDa  | 8   | 8   | 0   | 0   | 0   | 0   | 8   | 0   | 0   | -      | 0.0000 | -   | 0.0 |
| APOA1 Apolipoprotein A-I                                                | IPI00021841 | 31 kDa  | 48  | 66  | 65  | 83  | 14  | 20  | 57  | 74  | 17  | 0.0275 | 0.0511 | 0.2 | 0.3 |
| APOA2 Apolipoprotein A-II                                               | IPI00021854 | 11 kDa  | 11  | 10  | 0   | 4   | 6   | 5   | 11  | 2   | 5   | 0.2553 | 0.0233 | 2.7 | 0.5 |
| APOA4 Apolipoprotein A-IV                                               | IPI00304273 | 45 kDa  | 40  | 39  | 5   | 4   | 20  | 15  | 40  | 4   | 18  | 0.0283 | 0.0108 | 4.0 | 0.4 |
| APOD Apolipoprotein D                                                   | IPI00006662 | 21 kDa  | 368 | 377 | 307 | 376 | 289 | 323 | 372 | 341 | 306 | 0.4519 | 0.0633 | 0.9 | 0.8 |
| APOE Apolipoprotein E                                                   | IPI00021842 | 36 kDa  | 48  | 39  | 25  | 31  | 0   | 0   | 44  | 28  | 0   | 0.0104 | 0.0101 | 0.0 | 0.0 |
| APOH Beta-2-glycoprotein 1                                              | IPI00298828 | 38 kDa  | 91  | 89  | 122 | 97  | 98  | 97  | 90  | 109 | 98  | 0.4523 | 0.0281 | 0.9 | 1.1 |
| APOM Apolipoprotein M                                                   | IPI00030739 | 21 kDa  | 4   | 0   | 2   | 4   | 4   | 13  | 2   | 3   | 8   | 0.3879 | 0.3345 | 2.6 | 4.2 |
| APP Isoform APP770 of Amyloid beta A4 protein (Fragment)                | IPI00006608 | 87 kDa  | 43  | 36  | 28  | 27  | 17  | 15  | 39  | 28  | 16  | 0.0089 | 0.0261 | 0.6 | 0.4 |
| APRT Adenine phosphoribosyltransferase                                  | IPI00218693 | 20 kDa  | 0   | 3   | 0   | 0   | 0   | 0   | 2   | 0   | 0   | -      | 0.4226 | -   | 0.0 |
| AQP1 Aquaporin-1                                                        | IPI00024689 | 29 kDa  | 17  | 0   | 12  | 0   | 0   | 0   | 9   | 6   | 0   | 0.4226 | 0.4226 | 0.0 | 0.0 |
| AQP2 Aquaporin-2                                                        | IPI00012818 | 29 kDa  | 0   | 8   | 28  | 30  | 0   | 0   | 4   | 29  | 0   | 0.0014 | 0.4226 | 0.0 | 0.0 |
| ARF1 ADP-ribosylation factor 1                                          | IPI00215914 | 21 kDa  | 11  | 10  | 15  | 10  | 5   | 5   | 11  | 12  | 5   | 0.1146 | 0.0034 | 0.4 | 0.5 |
| ARF4 ADP-ribosylation factor 4                                          | IPI00215918 | 21 kDa  | 0   | 2   | 0   | 0   | 0   | 0   | 1   | 0   | 0   | -      | 0.4226 | -   | 0.0 |
| ARF5 ADP-ribosylation factor 5                                          | IPI00215919 | 21 kDa  | 0   | 0   | 9   | 0   | 0   | 0   | 0   | 5   | 0   | 0.4226 | -      | 0.0 | -   |
| ARF6 ADP-ribosylation factor 6                                          | IPI00215920 | 20 kDa  | 5   | 0   | 5   | 0   | 0   | 0   | 3   | 2   | 0   | 0.4226 | 0.4226 | 0.0 | 0.0 |
| ARHGDI1 Rho GDP-dissociation inhibitor 2                                | IPI00003817 | 23 kDa  | 0   | 0   | 22  | 23  | 4   | 2   | 0   | 23  | 3   | 0.0021 | 0.0468 | 0.1 | -   |
| ARMET Protein ARMET                                                     | IPI00328748 | 27 kDa  | 0   | 0   | 5   | 0   | 0   | 0   | 0   | 2   | 0   | 0.4226 | -      | 0.0 | -   |
| ARPC2 Actin-related protein 2/3 complex subunit 2                       | IPI00005161 | 34 kDa  | 0   | 0   | 7   | 10  | 0   | 0   | 0   | 8   | 0   | 0.0238 | -      | 0.0 | -   |
| ARPC3 Actin-related protein 2/3 complex subunit 3                       | IPI00005162 | 21 kDa  | 0   | 0   | 7   | 0   | 0   | 0   | 0   | 3   | 0   | 0.4226 | -      | 0.0 | -   |
| ARPC5 Isoform 1 of Actin-related protein 2/3 complex subunit 5          | IPI00550234 | 16 kDa  | 0   | 0   | 7   | 7   | 0   | 0   | 0   | 7   | 0   | 0.0001 | -      | 0.0 | -   |
| ARSA Putative uncharacterized protein DKFZp686G12235                    | IPI00329685 | 54 kDa  | 38  | 32  | 0   | 0   | 37  | 48  | 35  | 0   | 43  | 0.0165 | 0.3416 | -   | 1.2 |
| ARSB Arylsulfatase B                                                    | IPI00306576 | 60 kDa  | 0   | 3   | 0   | 0   | 0   | 4   | 2   | 0   | 2   | 0.4226 | 0.9871 | -   | 1.0 |
| ARSF Arylsulfatase F                                                    | IPI00008405 | 66 kDa  | 4   | 7   | 0   | 0   | 0   | 0   | 5   | 0   | 0   | -      | 0.0644 | -   | 0.0 |
| ASAH1 Acid ceramidase                                                   | IPI00013698 | 45 kDa  | 41  | 37  | 37  | 31  | 55  | 59  | 39  | 34  | 57  | 0.0243 | 0.0270 | 1.7 | 1.5 |
| ASAM Adipocyte adhesion molecule                                        | IPI00024929 | 41 kDa  | 3   | 3   | 0   | 3   | 0   | 0   | 3   | 1   | 0   | 0.4226 | 0.0049 | 0.0 | 0.0 |
| ASS1 Argininosuccinate synthase                                         | IPI00020632 | 51 kDa  | 22  | 21  | 0   | 0   | 0   | 0   | 21  | 0   | 0   | -      | 0.0009 | -   | 0.0 |
| ATP1A1 Isoform Long of Sodium/potassium-transporting ATPase             | IPI00006482 | 113 kDa | 15  | 14  | 0   | 0   | 0   | 0   | 14  | 0   | 0   | -      | 0.0017 | -   | 0.0 |
| ATP6AP2 Renin receptor                                                  | IPI00168884 | 39 kDa  | 3   | 3   | 0   | 0   | 0   | 0   | 3   | 0   | 0   | -      | 0.0049 | -   | 0.0 |
| ATP6V1A V-type proton ATPase catalytic subunit A                        | IPI00007682 | 68 kDa  | 5   | 6   | 0   | 0   | 0   | 0   | 5   | 0   | 0   | -      | 0.0049 | -   | 0.0 |
| ATP6V1B1 V-type proton ATPase subunit B, kidney isoform                 | IPI00304911 | 57 kDa  | 7   | 5   | 3   | 0   | 0   | 0   | 6   | 2   | 0   | 0.4226 | 0.0400 | 0.0 | 0.0 |
| ATP6V1G1 V-type proton ATPase subunit G 1                               | IPI00025285 | 14 kDa  | 2   | 2   | 0   | 3   | 0   | 0   | 2   | 1   | 0   | 0.4226 | 0.0049 | 0.0 | 0.0 |
| ATRN Isoform 2 of Attractin                                             | IPI00162735 | 141 kDa | 260 | 251 | 277 | 256 | 170 | 192 | 256 | 266 | 181 | 0.0287 | 0.0228 | 0.7 | 0.7 |
| AXL AXL receptor tyrosine kinase isoform 1                              | IPI00296992 | 98 kDa  | 57  | 62  | 80  | 68  | 42  | 43  | 60  | 74  | 42  | 0.0332 | 0.0222 | 0.6 | 0.7 |
| AZGP1 alpha-2-glycoprotein 1, zinc                                      | IPI00166729 | 34 kDa  | 391 | 415 | 149 | 173 | 890 | 874 | 403 | 161 | 882 | 0.0004 | 0.0009 | 5.5 | 2.2 |
| AZU1 Azurocidin                                                         | IPI00022246 | 27 kDa  | 0   | 0   | 53  | 71  | 7   | 11  | 0   | 62  | 9   | 0.0272 | 0.0294 | 0.1 | -   |
| B2M Beta-2-microglobulin                                                | IPI00004656 | 14 kDa  | 54  | 60  | 22  | 25  | 44  | 48  | 57  | 23  | 46  | 0.0145 | 0.1044 | 2.0 | 0.8 |
| B3GNT1 N-acetyllactosaminide beta-1,3-N-acetylglucosaminyltransferase 1 | IPI00009997 | 47 kDa  | 19  | 12  | 10  | 7   | 6   | 9   | 15  | 9   | 8   | 0.7792 | 0.2102 | 0.9 | 0.5 |
| B4GALT1 Isoform Long of Beta-1,4-galactosyltransferase 1                | IPI00215767 | 44 kDa  | 0   | 2   | 0   | 0   | 0   | 0   | 1   | 0   | 0   | -      | 0.4226 | -   | 0.0 |
| BAMBI BMP and activin membrane-bound inhibitor homologue 1              | IPI00011899 | 29 kDa  | 3   | 3   | 6   | 7   | 0   | 7   | 3   | 6   | 4   | 0.5227 | 0.9368 | 0.6 | 1.1 |
| BASP1 Brain acid soluble protein 1                                      | IPI00299024 | 23 kDa  | 5   | 3   | 23  | 19  | 4   | 4   | 4   | 21  | 4   | 0.0135 | 0.5278 | 0.2 | 0.9 |
| BBOX1 Gamma-butyrobetaine dioxygenase                                   | IPI00027416 | 45 kDa  | 4   | 0   | 0   | 0   | 0   | 0   | 2   | 0   | 0   | -      | 0.4226 | -   | 0.0 |
| BCAM Lutheran blood group glycoprotein                                  | IPI00002406 | 67 kDa  | 10  | 10  | 6   | 0   | 0   | 0   | 10  | 3   | 0   | 0.4226 | 0.0003 | 0.0 | 0.0 |
| BDH2 Isoform 1 of 3-hydroxybutyrate dehydrogenase type II               | IPI00607799 | 27 kDa  | 3   | 2   | 0   | 0   | 0   | 0   | 3   | 0   | 0   | -      | 0.0168 | -   | 0.0 |

|                                                                               |             |         |     |     |    |    |    |    |     |    |    |        |        |     |     |
|-------------------------------------------------------------------------------|-------------|---------|-----|-----|----|----|----|----|-----|----|----|--------|--------|-----|-----|
| BGN Biglycan                                                                  | IPI00010790 | 42 kDa  | 23  | 17  | 25 | 27 | 0  | 0  | 20  | 26 | 0  | 0.0011 | 0.0196 | 0.0 | 0.0 |
| BHMT Betaine--homocysteine S-methyltransferase 1                              | IPI00004101 | 45 kDa  | 33  | 30  | 0  | 0  | 4  | 2  | 31  | 0  | 3  | 0.0468 | 0.0034 | -   | 0.1 |
| BHMT2 Betaine--homocysteine S-methyltransferase 2                             | IPI00014363 | 40 kDa  | 10  | 0   | 0  | 0  | 0  | 0  | 5   | 0  | 0  | -      | 0.4226 | -   | 0.0 |
| BID Isoform 1 of BH3-interacting domain death agonist                         | IPI00413587 | 22 kDa  | 0   | 6   | 0  | 0  | 0  | 0  | 3   | 0  | 0  | -      | 0.4226 | -   | 0.0 |
| BPI Bactericidal permeability-increasing protein                              | IPI00827847 | 54 kDa  | 0   | 0   | 12 | 11 | 0  | 0  | 0   | 11 | 0  | 0.0009 | -      | 0.0 | -   |
| BST1 ADP-ribosyl cyclase 2                                                    | IPI00026240 | 36 kDa  | 0   | 0   | 0  | 0  | 7  | 5  | 0   | 0  | 6  | 0.0468 | 0.0468 | -   | -   |
| BTD biotinidase precursor                                                     | IPI00218413 | 61 kDa  | 38  | 32  | 22 | 16 | 41 | 48 | 35  | 19 | 45 | 0.0317 | 0.1767 | 2.3 | 1.3 |
| BTN2A1 butyrophilin, subfamily 2, member A1 isoform 2 p                       | IPI00019862 | 38 kDa  | 64  | 40  | 37 | 31 | 17 | 20 | 52  | 34 | 19 | 0.0395 | 0.1072 | 0.5 | 0.4 |
| C11orf52 Uncharacterized protein C11orf52                                     | IPI00059185 | 14 kDa  | 3   | 0   | 2  | 0  | 0  | 2  | 2   | 1  | 1  | 0.9896 | 0.8831 | 1.0 | 0.8 |
| C11orf54 Isoform 1 of Ester hydrolase C11orf54                                | IPI00072044 | 35 kDa  | 12  | 10  | 0  | 0  | 14 | 19 | 11  | 0  | 16 | 0.0248 | 0.2031 | -   | 1.5 |
| C16orf89 hypothetical protein LOC146556 isoform 2                             | IPI00166766 | 45 kDa  | 6   | 7   | 7  | 5  | 0  | 0  | 6   | 6  | 0  | 0.0143 | 0.0049 | 0.0 | 0.0 |
| C17orf101 Isoform 1 of PKHD domain-containing transmembrane protein C17orf101 | IPI00002884 | 36 kDa  | 3   | 0   | 0  | 0  | 0  | 0  | 2   | 0  | 0  | -      | 0.4226 | -   | 0.0 |
| C17orf37 Uncharacterized protein C17orf37                                     | IPI00878073 | 12 kDa  | 0   | 8   | 0  | 3  | 4  | 4  | 4   | 1  | 4  | 0.2372 | 0.9313 | 2.7 | 0.9 |
| C17orf61 UPF0451 protein C17orf61                                             | IPI00166483 | 12 kDa  | 5   | 5   | 0  | 0  | 0  | 0  | 5   | 0  | 0  | -      | 0.0017 | -   | 0.0 |
| C19orf10 UPF0556 protein C19orf10                                             | IPI00056357 | 19 kDa  | 10  | 12  | 3  | 0  | 5  | 7  | 11  | 2  | 6  | 0.1690 | 0.0683 | 3.5 | 0.6 |
| C1orf123 UPF0587 protein C1orf123                                             | IPI00016605 | 18 kDa  | 0   | 2   | 0  | 0  | 0  | 0  | 1   | 0  | 0  | -      | 0.4226 | -   | 0.0 |
| C1orf58 BRO1 domain-containing protein BROX                                   | IPI00065500 | 46 kDa  | 19  | 16  | 16 | 15 | 6  | 5  | 18  | 16 | 5  | 0.0090 | 0.0175 | 0.4 | 0.3 |
| C1orf68 Skin-specific protein 32                                              | IPI00023078 | 26 kDa  | 2   | 0   | 6  | 5  | 7  | 0  | 1   | 6  | 4  | 0.6636 | 0.5528 | 0.7 | 3.7 |
| C1RL Complement C1r subcomponent-like protein                                 | IPI00009793 | 53 kDa  | 59  | 70  | 74 | 83 | 41 | 44 | 65  | 79 | 42 | 0.0163 | 0.0616 | 0.5 | 0.7 |
| C1S Complement C1s subcomponent                                               | IPI00017696 | 77 kDa  | 3   | 5   | 3  | 3  | 6  | 5  | 4   | 3  | 5  | 0.1044 | 0.2671 | 1.8 | 1.4 |
| C3 Complement C3 (Fragment)                                                   | IPI00783987 | 187 kDa | 130 | 112 | 57 | 37 | 82 | 80 | 121 | 47 | 81 | 0.0750 | 0.0496 | 1.7 | 0.7 |
| C4A Complement component 4B                                                   | IPI00887154 | 193 kDa | 112 | 106 | 34 | 30 | 29 | 30 | 109 | 32 | 29 | 0.2870 | 0.0015 | 0.9 | 0.3 |
| C5 Complement C5                                                              | IPI00032291 | 188 kDa | 12  | 8   | 0  | 0  | 0  | 0  | 10  | 0  | 0  | -      | 0.0364 | -   | 0.0 |
| C5orf32 UPF0467 protein C5orf32                                               | IPI00382821 | 11 kDa  | 4   | 2   | 3  | 3  | 5  | 0  | 3   | 3  | 2  | 0.8307 | 0.8240 | 0.8 | 0.8 |
| C6 Complement component 6 precursor                                           | IPI00879709 | 106 kDa | 0   | 0   | 2  | 3  | 4  | 5  | 0   | 3  | 4  | 0.0866 | 0.0136 | 1.7 | -   |
| C6orf108 c-Myc-responsive protein Rcl                                         | IPI00007926 | 19 kDa  | 4   | 5   | 0  | 0  | 0  | 0  | 4   | 0  | 0  | -      | 0.0049 | -   | 0.0 |
| C6orf72 Uncharacterized protein C6orf72                                       | IPI00026031 | 37 kDa  | 0   | 9   | 0  | 0  | 0  | 0  | 5   | 0  | 0  | -      | 0.4226 | -   | 0.0 |
| C7 Complement component C7                                                    | IPI00296608 | 94 kDa  | 39  | 37  | 42 | 50 | 22 | 30 | 38  | 46 | 26 | 0.0707 | 0.0854 | 0.6 | 0.7 |
| C8G Complement component C8 gamma chain                                       | IPI00011261 | 22 kDa  | 4   | 2   | 0  | 0  | 0  | 0  | 3   | 0  | 0  | -      | 0.0654 | -   | 0.0 |
| C9 Complement component C9                                                    | IPI00022395 | 63 kDa  | 0   | 5   | 0  | 0  | 0  | 0  | 2   | 0  | 0  | -      | 0.4226 | -   | 0.0 |
| CA1 Carbonic anhydrase 1                                                      | IPI00215983 | 29 kDa  | 2   | 6   | 8  | 0  | 0  | 0  | 4   | 4  | 0  | 0.4226 | 0.1751 | 0.0 | 0.0 |
| CA2 Carbonic anhydrase 2                                                      | IPI00218414 | 29 kDa  | 8   | 12  | 8  | 11 | 0  | 0  | 10  | 9  | 0  | 0.0209 | 0.0310 | 0.0 | 0.0 |
| CA4 Carbonic anhydrase 4                                                      | IPI00027466 | 35 kDa  | 6   | 5   | 0  | 0  | 0  | 0  | 5   | 0  | 0  | -      | 0.0168 | -   | 0.0 |
| CAB39 Calcium-binding protein 39                                              | IPI00032561 | 40 kDa  | 5   | 0   | 12 | 8  | 0  | 0  | 3   | 10 | 0  | 0.0285 | 0.4226 | 0.0 | 0.0 |
| CACNA2D1 Dihydropyridine receptor alpha 2 subunit                             | IPI00470535 | 125 kDa | 3   | 5   | 0  | 0  | 0  | 0  | 4   | 0  | 0  | -      | 0.0419 | -   | 0.0 |
| CADM1 Isoform 1 of Cell adhesion molecule 1                                   | IPI00003813 | 49 kDa  | 22  | 24  | 34 | 22 | 16 | 0  | 23  | 28 | 8  | 0.1892 | 0.2071 | 0.3 | 0.4 |
| CADM3 Isoform 2 of Cell adhesion molecule 3                                   | IPI00009619 | 47 kDa  | 7   | 10  | 0  | 0  | 0  | 8  | 9   | 0  | 4  | 0.4226 | 0.4159 | -   | 0.5 |
| CADM4 Cell adhesion molecule 4                                                | IPI00176427 | 43 kDa  | 48  | 52  | 50 | 65 | 40 | 39 | 50  | 58 | 39 | 0.1452 | 0.0330 | 0.7 | 0.8 |
| CALB1 Calbindin                                                               | IPI00220361 | 30 kDa  | 6   | 7   | 8  | 16 | 0  | 0  | 6   | 12 | 0  | 0.0973 | 0.0049 | 0.0 | 0.0 |
| CALM3;CALM1;CALM2 Calmodulin                                                  | IPI00075248 | 17 kDa  | 4   | 5   | 16 | 20 | 11 | 12 | 4   | 18 | 12 | 0.0856 | 0.0037 | 0.6 | 2.7 |
| CALML3 Calmodulin-like protein 3                                              | IPI00216984 | 17 kDa  | 4   | 0   | 14 | 15 | 2  | 5  | 2   | 14 | 4  | 0.0130 | 0.5557 | 0.2 | 1.8 |
| CALML5 Calmodulin-like protein 5                                              | IPI00021536 | 16 kDa  | 0   | 5   | 8  | 7  | 0  | 0  | 2   | 7  | 0  | 0.0075 | 0.4226 | 0.0 | 0.0 |
| CALR Calreticulin                                                             | IPI00020599 | 48 kDa  | 0   | 0   | 17 | 8  | 0  | 0  | 0   | 13 | 0  | 0.1089 | -      | 0.0 | -   |
| CALU Isoform 2 of Calumenin                                                   | IPI00045396 | 37 kDa  | 2   | 0   | 0  | 0  | 0  | 0  | 1   | 0  | 0  | -      | 0.4226 | -   | 0.0 |
| CAMP Cathelicidin antimicrobial peptide precursor                             | IPI00292532 | 20 kDa  | 4   | 0   | 45 | 45 | 16 | 11 | 2   | 45 | 13 | 0.0076 | 0.0791 | 0.3 | 6.7 |
| CANT1 Isoform 1 of Soluble calcium-activated nucleotidase 1                   | IPI00103175 | 45 kDa  | 9   | 2   | 0  | 0  | 2  | 2  | 6   | 0  | 2  | 0.0006 | 0.4370 | -   | 0.4 |
| CAP1 Isoform 1 of Adenylyl cyclase-associated protein 1                       | IPI00008274 | 52 kDa  | 0   | 0   | 36 | 39 | 0  | 0  | 0   | 38 | 0  | 0.0023 | -      | 0.0 | -   |

|                                                            |             |         |     |     |     |     |     |     |     |     |     |        |        |      |     |
|------------------------------------------------------------|-------------|---------|-----|-----|-----|-----|-----|-----|-----|-----|-----|--------|--------|------|-----|
| CAPG Macrophage-capping protein                            | IPI00027341 | 39 kDa  | 9   | 2   | 20  | 29  | 0   | 6   | 6   | 24  | 3   | 0.0582 | 0.6073 | 0.1  | 0.5 |
| CAPN1 Calpain-1 catalytic subunit                          | IPI00011285 | 82 kDa  | 0   | 2   | 2   | 0   | 0   | 0   | 1   | 1   | 0   | 0.4226 | 0.4226 | 0.0  | 0.0 |
| CAPN5 cDNA FLJ46245 fis, clone TESTI4020596, highly simil  | IPI00643994 | 77 kDa  | 3   | 3   | 0   | 0   | 0   | 0   | 3   | 0   | 0   | -      | 0.0049 | -    | 0.0 |
| CAPN7 Calpain-7                                            | IPI00003765 | 93 kDa  | 8   | 7   | 0   | 0   | 0   | 2   | 7   | 0   | 1   | 0.4226 | 0.0404 | -    | 0.2 |
| CAPNS1 Calpain small subunit 1                             | IPI00025084 | 28 kDa  | 0   | 0   | 10  | 11  | 0   | 0   | 0   | 11  | 0   | 0.0005 | -      | 0.0  | -   |
| CAPZA1 F-actin-capping protein subunit alpha-1             | IPI00005969 | 33 kDa  | 2   | 2   | 0   | 0   | 0   | 0   | 2   | 0   | 0   | -      | 0.0049 | -    | 0.0 |
| CAPZB Isoform 1 of F-actin-capping protein subunit beta    | IPI00026185 | 34 kDa  | 0   | 0   | 13  | 7   | 0   | 0   | 10  | 0   | 0   | 0.0809 | -      | 0.0  | -   |
| CASP14 Caspase-14                                          | IPI00013885 | 28 kDa  | 9   | 12  | 16  | 18  | 29  | 22  | 10  | 17  | 26  | 0.1133 | 0.0442 | 1.5  | 2.5 |
| CAST cDNA FLJ77737, highly similar to Homo sapiens calpa   | IPI00302047 | 47 kDa  | 0   | 0   | 6   | 4   | 0   | 0   | 0   | 5   | 0   | 0.0285 | -      | 0.0  | -   |
| CAT Catalase                                               | IPI00465436 | 60 kDa  | 0   | 0   | 20  | 20  | 2   | 0   | 0   | 20  | 1   | 0.0047 | 0.4226 | 0.1  | -   |
| CBR1 Carbonyl reductase [NADPH] 1                          | IPI00295386 | 30 kDa  | 0   | 6   | 0   | 0   | 0   | 0   | 3   | 0   | 0   | -      | 0.4226 | -    | 0.0 |
| CBX3;LOC653972 Chromobox protein homolog 3                 | IPI00297579 | 21 kDa  | 0   | 0   | 2   | 0   | 0   | 0   | 0   | 1   | 0   | 0.4226 | -      | 0.0  | -   |
| CD14 Monocyte differentiation antigen CD14                 | IPI00029260 | 40 kDa  | 142 | 142 | 89  | 74  | 269 | 242 | 142 | 81  | 255 | 0.0076 | 0.0131 | 3.1  | 1.8 |
| CD160 CD160 antigen                                        | IPI00296067 | 20 kDa  | 4   | 5   | 9   | 10  | 0   | 0   | 4   | 9   | 0   | 0.0002 | 0.0049 | 0.0  | 0.0 |
| CD177 Isoform 1 of CD177 antigen                           | IPI00297444 | 46 kDa  | 0   | 0   | 13  | 0   | 14  | 11  | 0   | 6   | 12  | 0.4696 | 0.0153 | 1.9  | -   |
| CD209 Isoform 1 of CD209 antigen                           | IPI00028136 | 46 kDa  | 3   | 5   | 0   | 0   | 7   | 7   | 4   | 0   | 7   | 0.0006 | 0.0520 | -    | 1.9 |
| CD248 Isoform 1 of Endosialin                              | IPI00006971 | 81 kDa  | 141 | 130 | 174 | 150 | 119 | 128 | 136 | 162 | 124 | 0.0942 | 0.2191 | 0.8  | 0.9 |
| CD27 CD27 antigen                                          | IPI00002435 | 29 kDa  | 23  | 33  | 10  | 38  | 16  | 19  | 28  | 24  | 18  | 0.6764 | 0.1861 | 0.7  | 0.6 |
| CD276 Isoform 1 of CD276 antigen                           | IPI00410488 | 57 kDa  | 12  | 0   | 12  | 0   | 12  | 0   | 6   | 6   | 6   | 0.9643 | 0.9821 | 1.1  | 1.0 |
| CD300A Isoform 1 of CMRF35-like molecule 8                 | IPI00414784 | 33 kDa  | 20  | 17  | 16  | 19  | 11  | 11  | 19  | 18  | 11  | 0.0438 | 0.0308 | 0.6  | 0.6 |
| CD300E cDNA FLJ61198, highly similar to Homo sapiens CD    | IPI00376457 | 28 kDa  | 0   | 3   | 8   | 10  | 0   | 0   | 2   | 9   | 0   | 0.0065 | 0.4226 | 0.0  | 0.0 |
| CD300LG Isoform 1 of CMRF35-like molecule 9                | IPI00152018 | 36 kDa  | 100 | 85  | 134 | 105 | 70  | 56  | 93  | 120 | 63  | 0.0732 | 0.0987 | 0.5  | 0.7 |
| CD320 CD320 antigen                                        | IPI00641251 | 29 kDa  | 7   | 0   | 13  | 8   | 0   | 0   | 4   | 10  | 0   | 0.0445 | 0.4226 | 0.0  | 0.0 |
| CD33 Myeloid cell surface antigen CD33                     | IPI00022203 | 40 kDa  | 6   | 5   | 3   | 0   | 0   | 0   | 5   | 2   | 0   | 0.4226 | 0.0168 | 0.0  | 0.0 |
| CD40 Isoform I of Tumor necrosis factor receptor superfam  | IPI00018282 | 31 kDa  | 0   | 3   | 0   | 0   | 0   | 0   | 2   | 0   | 0   | -      | 0.4226 | -    | 0.0 |
| CD44 Isoform 12 of CD44 antigen                            | IPI00297160 | 39 kDa  | 181 | 199 | 170 | 187 | 149 | 174 | 190 | 178 | 162 | 0.3711 | 0.2021 | 0.9  | 0.8 |
| CD46 Isoform A of Membrane cofactor protein                | IPI00012035 | 44 kDa  | 0   | 0   | 0   | 0   | 4   | 0   | 0   | 0   | 2   | 0.4226 | 0.4226 | -    | -   |
| CD55 Decay-accelerating factor splicing variant 4          | IPI00152418 | 56 kDa  | 76  | 84  | 68  | 54  | 177 | 160 | 80  | 61  | 168 | 0.0104 | 0.0113 | 2.7  | 2.1 |
| CD58 Isoform 1 of Lymphocyte function-associated antigen   | IPI00017529 | 28 kDa  | 0   | 2   | 3   | 4   | 5   | 0   | 1   | 4   | 2   | 0.6575 | 0.6743 | 0.7  | 2.2 |
| CD59 CD59 glycoprotein                                     | IPI00011302 | 14 kDa  | 274 | 291 | 282 | 388 | 300 | 339 | 283 | 335 | 320 | 0.8056 | 0.2307 | 1.0  | 1.1 |
| CD5L CD5 antigen-like                                      | IPI00025204 | 38 kDa  | 4   | 8   | 8   | 10  | 11  | 17  | 6   | 9   | 14  | 0.2099 | 0.1449 | 1.6  | 2.3 |
| CD63 CD63 antigen                                          | IPI00215998 | 26 kDa  | 14  | 0   | 0   | 0   | 0   | 0   | 7   | 0   | 0   | -      | 0.4226 | -    | 0.0 |
| CD84 Isoform 3 of SLAM family member 5                     | IPI00022039 | 37 kDa  | 20  | 18  | 14  | 14  | 21  | 17  | 19  | 14  | 19  | 0.1574 | 0.8932 | 1.4  | 1.0 |
| CD9 CD9 antigen                                            | IPI00215997 | 25 kDa  | 29  | 30  | 36  | 35  | 7   | 8   | 29  | 36  | 8   | 0.0003 | 0.0008 | 0.2  | 0.3 |
| CDA Cytidine deaminase                                     | IPI00027983 | 16 kDa  | 0   | 0   | 6   | 0   | 0   | 0   | 0   | 3   | 0   | 0.4226 | -      | 0.0  | -   |
| CDC42 Isoform 2 of Cell division control protein 42 homolo | IPI00016786 | 21 kDa  | 13  | 8   | 7   | 8   | 6   | 7   | 11  | 8   | 7   | 0.3528 | 0.2621 | 0.9  | 0.6 |
| CDH1 Epithelial cadherin                                   | IPI00025861 | 97 kDa  | 56  | 65  | 38  | 31  | 165 | 136 | 60  | 35  | 151 | 0.0166 | 0.0276 | 4.3  | 2.5 |
| CDH13 Cadherin-13                                          | IPI00024046 | 78 kDa  | 52  | 55  | 51  | 50  | 55  | 45  | 54  | 51  | 50  | 0.8796 | 0.5366 | 1.0  | 0.9 |
| CDH19 Cadherin-19                                          | IPI00028135 | 87 kDa  | 4   | 0   | 0   | 0   | 0   | 0   | 2   | 0   | 0   | -      | 0.4226 | -    | 0.0 |
| CDH2 Cadherin-2                                            | IPI00290085 | 100 kDa | 28  | 18  | 9   | 15  | 24  | 24  | 23  | 12  | 24  | 0.0565 | 0.9379 | 2.0  | 1.0 |
| CDH3 Isoform 2 of Cadherin-3                               | IPI00645614 | 87 kDa  | 0   | 0   | 0   | 0   | 0   | 26  | 0   | 0   | 13  | 0.4226 | 0.4226 | -    | -   |
| CDH6 Isoform 1 of Cadherin-6                               | IPI00024035 | 88 kDa  | 11  | 15  | 8   | 5   | 19  | 12  | 13  | 7   | 15  | 0.1473 | 0.6265 | 2.2  | 1.2 |
| cDNA FLD58478, highly similar to Cadherin-11               | IPI00909283 | 86 kDa  | 59  | 53  | 10  | 0   | 75  | 79  | 56  | 5   | 77  | 0.0062 | 0.0311 | 14.8 | 1.4 |
| CEACAM5 Protein                                            | IPI00880101 | 76 kDa  | 0   | 0   | 15  | 22  | 6   | 6   | 0   | 18  | 6   | 0.0671 | 0.0006 | 0.3  | -   |
| CEACAM6 Carcinoembryonic antigen-related cell adhesion     | IPI00027412 | 37 kDa  | 0   | 0   | 0   | 5   | 0   | 0   | 0   | 3   | 0   | 0.4226 | -      | 0.0  | -   |
| CEACAM7 Isoform 2a of Carcinoembryonic antigen-related     | IPI00028270 | 29 kDa  | 0   | 0   | 10  | 12  | 0   | 0   | 0   | 11  | 0   | 0.0065 | -      | 0.0  | -   |
| CEACAM8 Carcinoembryonic antigen-related cell adhesion     | IPI00013972 | 38 kDa  | 10  | 13  | 19  | 22  | 17  | 12  | 11  | 20  | 15  | 0.2291 | 0.4006 | 0.7  | 1.3 |

|                                                            |             |         |     |     |     |     |     |     |     |     |     |        |        |     |     |
|------------------------------------------------------------|-------------|---------|-----|-----|-----|-----|-----|-----|-----|-----|-----|--------|--------|-----|-----|
| CEL carboxyl ester lipase precursor                        | IPI00099670 | 80 kDa  | 66  | 73  | 72  | 59  | 16  | 14  | 69  | 65  | 15  | 0.0174 | 0.0040 | 0.2 | 0.2 |
| CETP Isoform 1 of Cholesteryl ester transfer protein       | IPI00006173 | 55 kDa  | 8   | 12  | 0   | 0   | 10  | 14  | 10  | 0   | 12  | 0.0294 | 0.4901 | -   | 1.2 |
| CFB cDNA FLJ55673, highly similar to Complement factor B   | IPI00019591 | 141 kDa | 48  | 45  | 28  | 31  | 12  | 17  | 46  | 30  | 14  | 0.0309 | 0.0064 | 0.5 | 0.3 |
| CFH Isoform 1 of Complement factor H                       | IPI00029739 | 139 kDa | 34  | 21  | 86  | 86  | 40  | 54  | 27  | 86  | 47  | 0.0338 | 0.1834 | 0.5 | 1.7 |
| CFHR1 Complement factor H-related protein 1                | IPI00011264 | 38 kDa  | 18  | 15  | 10  | 0   | 20  | 19  | 16  | 5   | 19  | 0.1133 | 0.2079 | 3.7 | 1.2 |
| CFHR2 Isoform Long of Complement factor H-related prote    | IPI00006154 | 31 kDa  | 0   | 0   | 0   | 0   | 0   | 18  | 0   | 0   | 9   | 0.4226 | 0.4226 | -   | -   |
| CFI Complement factor I                                    | IPI00291867 | 66 kDa  | 56  | 63  | 57  | 52  | 30  | 30  | 60  | 54  | 30  | 0.0102 | 0.0147 | 0.5 | 0.5 |
| CFL1 Cofilin-1                                             | IPI00012011 | 19 kDa  | 9   | 3   | 27  | 26  | 6   | 6   | 6   | 26  | 6   | 0.0004 | 0.9585 | 0.2 | 1.0 |
| CFP Properdin                                              | IPI00021364 | 51 kDa  | 0   | 0   | 7   | 0   | 0   | 0   | 0   | 3   | 0   | 0.4226 | -      | 0.0 | -   |
| CHI3L1 Chitinase-3-like protein 1                          | IPI00002147 | 43 kDa  | 0   | 2   | 0   | 3   | 0   | 0   | 1   | 1   | 0   | 0.4226 | 0.4226 | 0.0 | 0.0 |
| CHIT1 Isoform 3 of Chitotriosidase-1                       | IPI00375364 | 49 kDa  | 0   | 0   | 5   | 4   | 0   | 0   | 0   | 4   | 0   | 0.0039 | -      | 0.0 | -   |
| CHL1 Isoform 2 of Neural cell adhesion molecule L1-like pr | IPI00299059 | 137 kDa | 56  | 58  | 44  | 52  | 46  | 51  | 57  | 48  | 48  | 0.9146 | 0.0808 | 1.0 | 0.9 |
| CHMP1A Isoform 1 of Charged multivesicular body protein    | IPI00382452 | 22 kDa  | 2   | 0   | 3   | 4   | 0   | 0   | 1   | 4   | 0   | 0.0065 | 0.4226 | 0.0 | 0.0 |
| CHMP1B Charged multivesicular body protein 1b              | IPI00156984 | 22 kDa  | 10  | 7   | 7   | 14  | 0   | 0   | 8   | 10  | 0   | 0.0911 | 0.0318 | 0.0 | 0.0 |
| CHMP2A Charged multivesicular body protein 2a              | IPI00004416 | 25 kDa  | 13  | 8   | 20  | 15  | 0   | 0   | 11  | 17  | 0   | 0.0179 | 0.0508 | 0.0 | 0.0 |
| CHMP2B Charged multivesicular body protein 2b              | IPI00550181 | 24 kDa  | 3   | 0   | 5   | 0   | 0   | 0   | 2   | 2   | 0   | 0.4226 | 0.4226 | 0.0 | 0.0 |
| CHMP4B Charged multivesicular body protein 4b              | IPI00025974 | 25 kDa  | 3   | 6   | 7   | 10  | 0   | 0   | 4   | 8   | 0   | 0.0238 | 0.0866 | 0.0 | 0.0 |
| CHMP5 Charged multivesicular body protein 5                | IPI00100796 | 25 kDa  | 5   | 0   | 8   | 15  | 0   | 0   | 3   | 12  | 0   | 0.0784 | 0.4226 | 0.0 | 0.0 |
| CHODL Isoform 1 of Chondrolectin                           | IPI00017202 | 30 kDa  | 3   | 0   | 6   | 7   | 0   | 0   | 2   | 6   | 0   | 0.0065 | 0.4226 | 0.0 | 0.0 |
| CILP Cartilage intermediate layer protein 1                | IPI00289275 | 133 kDa | 8   | 12  | 0   | 3   | 4   | 8   | 10  | 1   | 6   | 0.2218 | 0.3212 | 4.4 | 0.6 |
| CILP2 Cartilage intermediate layer protein 2 precursor     | IPI00216780 | 127 kDa | 3   | 0   | 0   | 0   | 0   | 0   | 2   | 0   | 0   | -      | 0.4226 | -   | 0.0 |
| CKB Creatine kinase B-type                                 | IPI00022977 | 43 kDa  | 3   | 0   | 0   | 0   | 0   | 0   | 2   | 0   | 0   | -      | 0.4226 | -   | 0.0 |
| CLC Eosinophil lysophospholipase                           | IPI00216071 | 16 kDa  | 0   | 0   | 7   | 5   | 0   | 0   | 0   | 6   | 0   | 0.0143 | -      | 0.0 | -   |
| CLEC14A C-type lectin domain family 14 member A            | IPI00240345 | 52 kDa  | 30  | 21  | 32  | 19  | 11  | 15  | 25  | 26  | 13  | 0.2168 | 0.1404 | 0.5 | 0.5 |
| CLEC3B Putative uncharacterized protein DKFZp686H1724f     | IPI00792115 | 18 kDa  | 61  | 60  | 53  | 65  | 22  | 33  | 60  | 59  | 28  | 0.0598 | 0.0260 | 0.5 | 0.5 |
| CLEC4G C-type lectin domain family 4 member G              | IPI00243602 | 33 kDa  | 11  | 7   | 14  | 11  | 6   | 6   | 9   | 12  | 6   | 0.0523 | 0.2939 | 0.5 | 0.7 |
| CLIC1 Chloride intracellular channel protein 1             | IPI00010896 | 27 kDa  | 7   | 5   | 6   | 23  | 0   | 0   | 6   | 14  | 0   | 0.2375 | 0.0400 | 0.0 | 0.0 |
| CLIC4 Chloride intracellular channel protein 4             | IPI00001960 | 29 kDa  | 0   | 7   | 0   | 0   | 0   | 0   | 3   | 0   | 0   | -      | 0.4226 | -   | 0.0 |
| CLN5 ceroid-lipofuscinosis, neuronal 5                     | IPI00026050 | 46 kDa  | 3   | 9   | 0   | 0   | 7   | 4   | 6   | 0   | 6   | 0.1067 | 0.8846 | -   | 0.9 |
| CLPS Colipase                                              | IPI00022232 | 12 kDa  | 3   | 5   | 0   | 4   | 0   | 0   | 4   | 2   | 0   | 0.4226 | 0.0419 | 0.0 | 0.0 |
| CLSTN1 Isoform 2 of Calsyntenin-1 (Fragment)               | IPI00007257 | 109 kDa | 3   | 0   | 2   | 0   | 2   | 0   | 2   | 1   | 1   | 0.9643 | 0.9074 | 1.1 | 0.8 |
| CLU Clusterin                                              | IPI00291262 | 52 kDa  | 191 | 210 | 227 | 291 | 128 | 135 | 200 | 259 | 131 | 0.0588 | 0.0200 | 0.5 | 0.7 |
| CMBL Carboxymethylenebutenolidase homolog                  | IPI00383046 | 28 kDa  | 5   | 0   | 0   | 0   | 0   | 0   | 3   | 0   | 0   | -      | 0.4226 | -   | 0.0 |
| CNDP2 Cytosolic non-specific dipeptidase                   | IPI00177728 | 53 kDa  | 9   | 6   | 0   | 0   | 0   | 0   | 7   | 0   | 0   | -      | 0.0450 | -   | 0.0 |
| CNP Isoform CNPI of 2',3'-cyclic-nucleotide 3'-phosphodies | IPI00220993 | 45 kDa  | 3   | 3   | 0   | 0   | 0   | 0   | 3   | 0   | 0   | -      | 0.0049 | -   | 0.0 |
| CNTFR Ciliary neurotrophic factor receptor alpha           | IPI00003102 | 41 kDa  | 32  | 26  | 30  | 16  | 29  | 33  | 29  | 23  | 31  | 0.4023 | 0.6957 | 1.3 | 1.1 |
| CNTN1 Isoform 1 of Contactin-1                             | IPI00029751 | 113 kDa | 86  | 82  | 98  | 99  | 35  | 48  | 84  | 99  | 42  | 0.0140 | 0.0274 | 0.4 | 0.5 |
| COCH Cochlin                                               | IPI00012386 | 59 kDa  | 9   | 8   | 10  | 11  | 15  | 12  | 9   | 11  | 13  | 0.2257 | 0.0962 | 1.3 | 1.6 |
| COL12A1 Isoform 4 of Collagen alpha-1(XII) chain           | IPI00302944 | 325 kDa | 17  | 17  | 25  | 23  | 12  | 15  | 17  | 24  | 14  | 0.0308 | 0.1589 | 0.6 | 0.8 |
| COL15A1 Collagen alpha-1(XV) chain                         | IPI00295414 | 142 kDa | 34  | 45  | 63  | 61  | 10  | 8   | 39  | 62  | 9   | 0.0004 | 0.0316 | 0.1 | 0.2 |
| COL18A1 Isoform 2 of Collagen alpha-1(XVIII) chain         | IPI00022822 | 154 kDa | 25  | 22  | 8   | 0   | 0   | 0   | 23  | 4   | 0   | 0.4226 | 0.0044 | 0.0 | 0.0 |
| COL1A2 Collagen alpha-2(I) chain                           | IPI00304962 | 129 kDa | 2   | 0   | 0   | 0   | 0   | 0   | 1   | 0   | 0   | -      | 0.4226 | -   | 0.0 |
| COL28A1 Isoform 1 of Collagen alpha-1(XXVIII) chain        | IPI00657936 | 117 kDa | 6   | 0   | 12  | 7   | 5   | 0   | 3   | 9   | 2   | 0.1910 | 0.9074 | 0.3 | 0.8 |
| COL4A1 Putative uncharacterized protein COL4A1             | IPI00743696 | 161 kDa | 18  | 16  | 13  | 10  | 5   | 4   | 17  | 11  | 4   | 0.0594 | 0.0084 | 0.4 | 0.2 |
| COL4A2 Collagen alpha-2(IV) chain                          | IPI00306322 | 168 kDa | 70  | 58  | 19  | 20  | 6   | 7   | 64  | 19  | 7   | 0.0066 | 0.0116 | 0.3 | 0.1 |
| COL6A1 Collagen alpha-1(VI) chain                          | IPI00291136 | 109 kDa | 257 | 299 | 348 | 354 | 174 | 171 | 278 | 351 | 173 | 0.0003 | 0.0384 | 0.5 | 0.6 |
| COL6A2 Isoform 2C2A of Collagen alpha-2(VI) chain          | IPI00220613 | 97 kDa  | 3   | 3   | 5   | 0   | 4   | 4   | 3   | 2   | 4   | 0.6256 | 0.2366 | 1.6 | 1.1 |

|                                                          |             |         |     |     |     |     |     |     |     |     |     |        |        |      |     |
|----------------------------------------------------------|-------------|---------|-----|-----|-----|-----|-----|-----|-----|-----|-----|--------|--------|------|-----|
| COL6A3 Isoform 1 of Collagen alpha-3(VI) chain           | IPI00022200 | 344 kDa | 51  | 54  | 31  | 45  | 41  | 44  | 53  | 38  | 42  | 0.6009 | 0.0389 | 1.1  | 0.8 |
| COLEC12 Isoform 1 of Collectin-12                        | IPI00414467 | 82 kDa  | 11  | 13  | 0   | 0   | 14  | 13  | 12  | 0   | 13  | 0.0006 | 0.2366 | -    | 1.1 |
| COMP Cartilage oligomeric matrix protein                 | IPI00028030 | 83 kDa  | 0   | 6   | 7   | 7   | 0   | 0   | 3   | 7   | 0   | 0.0001 | 0.4226 | 0.0  | 0.0 |
| CORO1A Coronin-1A                                        | IPI00010133 | 51 kDa  | 0   | 0   | 14  | 11  | 0   | 0   | 0   | 12  | 0   | 0.0143 | -      | 0.0  | -   |
| COTL1 Coactosin-like protein                             | IPI00017704 | 16 kDa  | 19  | 28  | 10  | 12  | 20  | 14  | 23  | 11  | 17  | 0.1977 | 0.3492 | 1.5  | 0.7 |
| CP Ceruloplasmin                                         | IPI00017601 | 122 kDa | 303 | 308 | 34  | 34  | 479 | 459 | 305 | 34  | 469 | 0.0005 | 0.0040 | 13.9 | 1.5 |
| CPE Carboxypeptidase E precursor                         | IPI00031121 | 64 kDa  | 30  | 26  | 12  | 7   | 30  | 24  | 28  | 9   | 27  | 0.0463 | 0.7146 | 2.9  | 0.9 |
| CPM Carboxypeptidase M                                   | IPI00026270 | 51 kDa  | 30  | 29  | 39  | 56  | 20  | 15  | 29  | 48  | 18  | 0.0725 | 0.0375 | 0.4  | 0.6 |
| CPN2 Carboxypeptidase N subunit 2                        | IPI00479116 | 61 kDa  | 24  | 28  | 57  | 56  | 16  | 9   | 26  | 56  | 13  | 0.0060 | 0.0764 | 0.2  | 0.5 |
| CPNE3 Copine-3                                           | IPI00024403 | 60 kDa  | 4   | 3   | 6   | 3   | 2   | 0   | 4   | 4   | 1   | 0.2665 | 0.1903 | 0.3  | 0.3 |
| CPNE8 Copine-8                                           | IPI00384746 | 63 kDa  | 5   | 3   | 0   | 0   | 0   | 0   | 4   | 0   | 0   | -      | 0.0318 | -    | 0.0 |
| CPVL Probable serine carboxypeptidase CPVL               | IPI00301395 | 54 kDa  | 47  | 39  | 10  | 10  | 32  | 40  | 43  | 10  | 36  | 0.0219 | 0.3440 | 3.6  | 0.8 |
| CPZ Isoform 2 of Carboxypeptidase Z                      | IPI00179185 | 73 kDa  | 6   | 7   | 5   | 0   | 0   | 0   | 6   | 2   | 0   | 0.4226 | 0.0049 | 0.0  | 0.0 |
| CR1 Complement receptor type 1                           | IPI00412546 | 273 kDa | 16  | 9   | 8   | 10  | 11  | 7   | 13  | 9   | 9   | 0.8948 | 0.4743 | 1.0  | 0.7 |
| CRABP2 Cellular retinoic acid-binding protein 2          | IPI00216088 | 16 kDa  | 13  | 15  | 16  | 12  | 7   | 8   | 14  | 14  | 8   | 0.0875 | 0.0291 | 0.6  | 0.6 |
| CRB2 Isoform 1 of Crumbs homolog 2                       | IPI00410585 | 134 kDa | 7   | 7   | 0   | 0   | 2   | 0   | 7   | 0   | 1   | 0.4226 | 0.0443 | -    | 0.2 |
| CRIM1 Cysteine-rich motor neuron 1 protein               | IPI00009294 | 114 kDa | 3   | 6   | 2   | 0   | 4   | 5   | 4   | 1   | 4   | 0.1351 | 0.9279 | 3.7  | 1.0 |
| CRNN Cornulin                                            | IPI00297056 | 54 kDa  | 15  | 16  | 45  | 44  | 5   | 0   | 16  | 44  | 2   | 0.0039 | 0.0360 | 0.1  | 0.2 |
| CRP Isoform 1 of C-reactive protein                      | IPI00022389 | 25 kDa  | 4   | 2   | 0   | 0   | 0   | 4   | 3   | 0   | 2   | 0.4226 | 0.5557 | -    | 0.6 |
| CRTAC1 Isoform 1 of Cartilage acidic protein 1           | IPI00451624 | 71 kDa  | 0   | 5   | 0   | 0   | 0   | 0   | 2   | 0   | 0   | -      | 0.4226 | -    | 0.0 |
| CRYAB Alpha-crystallin B chain                           | IPI00021369 | 20 kDa  | 5   | 8   | 7   | 0   | 7   | 0   | 7   | 3   | 4   | 0.9643 | 0.5593 | 1.1  | 0.6 |
| CRYGD Gamma-crystallin D                                 | IPI00215881 | 21 kDa  | 5   | 3   | 0   | 0   | 0   | 0   | 4   | 0   | 0   | -      | 0.0318 | -    | 0.0 |
| CRYL1 Isoform 1 of Lambda-crystallin homolog             | IPI00006443 | 35 kDa  | 6   | 6   | 0   | 0   | 0   | 0   | 6   | 0   | 0   | -      | 0.0004 | -    | 0.0 |
| CRYM Mu-crystallin homolog                               | IPI00000949 | 34 kDa  | 2   | 0   | 0   | 0   | 0   | 0   | 1   | 0   | 0   | -      | 0.4226 | -    | 0.0 |
| Cryocryoglobulin #REF! kappa light chain variable region | IPI00890703 | 12 kDa  | 12  | 10  | 0   | 0   | 0   | 0   | 11  | 0   | 0   | -      | 0.0053 | -    | 0.0 |
| CRYZ Quinone oxidoreductase                              | IPI00000792 | 35 kDa  | 3   | 7   | 2   | 0   | 0   | 0   | 5   | 1   | 0   | 0.4226 | 0.1268 | 0.0  | 0.0 |
| CSF1 Isoform 1 of Macrophage colony-stimulating factor 1 | IPI00015881 | 60 kDa  | 20  | 16  | 14  | 19  | 24  | 24  | 18  | 16  | 24  | 0.1095 | 0.1025 | 1.4  | 1.3 |
| CSPG4 Chondroitin sulfate proteoglycan 4                 | IPI00019157 | 250 kDa | 23  | 22  | 36  | 38  | 14  | 13  | 22  | 37  | 13  | 0.0024 | 0.0051 | 0.4  | 0.6 |
| CST3 Cystatin-C                                          | IPI00032293 | 16 kDa  | 41  | 25  | 34  | 25  | 26  | 21  | 33  | 29  | 24  | 0.4074 | 0.3671 | 0.8  | 0.7 |
| CST4 Cystatin-S                                          | IPI00032294 | 16 kDa  | 10  | 10  | 5   | 0   | 6   | 7   | 10  | 2   | 7   | 0.2068 | 0.0176 | 2.9  | 0.7 |
| CST6 Cystatin-M                                          | IPI00019954 | 17 kDa  | 38  | 43  | 38  | 39  | 62  | 59  | 40  | 39  | 61  | 0.0058 | 0.0181 | 1.6  | 1.5 |
| CSTA Cystatin-A                                          | IPI00032325 | 11 kDa  | 27  | 20  | 21  | 26  | 22  | 27  | 23  | 23  | 25  | 0.7207 | 0.7671 | 1.1  | 1.1 |
| CSTB Cystatin-B                                          | IPI00021828 | 11 kDa  | 11  | 16  | 27  | 35  | 14  | 14  | 14  | 31  | 14  | 0.0603 | 0.8990 | 0.4  | 1.0 |
| CTBS Di-N-acetylchitobiase                               | IPI00007778 | 44 kDa  | 38  | 38  | 37  | 20  | 127 | 108 | 38  | 29  | 117 | 0.0201 | 0.0145 | 4.1  | 3.1 |
| CTGF Isoform 1 of Connective tissue growth factor        | IPI00020977 | 38 kDa  | 7   | 5   | 7   | 10  | 5   | 9   | 6   | 8   | 7   | 0.7306 | 0.6342 | 0.9  | 1.2 |
| CTSA Lysosomal protective protein                        | IPI00021794 | 54 kDa  | 26  | 21  | 5   | 8   | 73  | 52  | 23  | 6   | 63  | 0.0351 | 0.0701 | 9.8  | 2.7 |
| CTSB Cathepsin B                                         | IPI00295741 | 38 kDa  | 38  | 47  | 53  | 53  | 109 | 130 | 43  | 53  | 120 | 0.0231 | 0.0207 | 2.3  | 2.8 |
| CTSC Dipeptidyl-peptidase 1                              | IPI00022810 | 52 kDa  | 31  | 44  | 20  | 19  | 112 | 103 | 37  | 19  | 107 | 0.0027 | 0.0123 | 5.5  | 2.9 |
| CTSD Cathepsin D                                         | IPI00011229 | 45 kDa  | 87  | 93  | 43  | 44  | 68  | 66  | 90  | 43  | 67  | 0.0023 | 0.0207 | 1.6  | 0.7 |
| CTSG Cathepsin G                                         | IPI00028064 | 29 kDa  | 0   | 0   | 32  | 25  | 22  | 18  | 0   | 28  | 20  | 0.2083 | 0.0132 | 0.7  | -   |
| CTSH Cathepsin H                                         | IPI00297487 | 37 kDa  | 21  | 25  | 12  | 11  | 46  | 35  | 23  | 11  | 41  | 0.0307 | 0.0913 | 3.6  | 1.8 |
| CTSL1 Cathepsin L1                                       | IPI00012887 | 38 kDa  | 8   | 8   | 9   | 10  | 12  | 17  | 8   | 9   | 14  | 0.1319 | 0.0881 | 1.5  | 1.8 |
| CTSS Cathepsin S                                         | IPI00299150 | 37 kDa  | 0   | 0   | 6   | 0   | 9   | 7   | 0   | 3   | 8   | 0.2377 | 0.0103 | 2.7  | -   |
| CTSZ Cathepsin Z                                         | IPI00002745 | 34 kDa  | 10  | 7   | 8   | 5   | 22  | 30  | 8   | 7   | 26  | 0.0374 | 0.0462 | 3.8  | 3.1 |
| CTTN Src substrate cortactin                             | IPI00029601 | 62 kDa  | 0   | 2   | 0   | 3   | 0   | 0   | 1   | 1   | 0   | 0.4226 | 0.4226 | 0.0  | 0.0 |
| CUBN Cubilin                                             | IPI00160130 | 399 kDa | 833 | 848 | 683 | 704 | 864 | 838 | 840 | 694 | 851 | 0.0112 | 0.5462 | 1.2  | 1.0 |
| CUTA Isoform A of Protein CutA                           | IPI00034319 | 21 kDa  | 0   | 6   | 5   | 0   | 0   | 0   | 3   | 2   | 0   | 0.4226 | 0.4226 | 0.0  | 0.0 |



|                                                               |                 |         |     |     |     |     |     |     |     |     |     |        |        |      |     |
|---------------------------------------------------------------|-----------------|---------|-----|-----|-----|-----|-----|-----|-----|-----|-----|--------|--------|------|-----|
| CXCL12 chemokine (C-X-C motif) ligand 12 (stromal cell-de     | IPI00413781     | 14 kDa  | 7   | 0   | 9   | 7   | 2   | 0   | 4   | 8   | 1   | 0.0602 | 0.6053 | 0.2  | 0.4 |
| CYCS Cytochrome c                                             | IPI00465315     | 12 kDa  | 11  | 5   | 10  | 8   | 0   | 2   | 8   | 9   | 1   | 0.0381 | 0.1915 | 0.1  | 0.2 |
| CYFIP1 Isoform 1 of Cytoplasmic FMR1-interacting protein      | IPI00644231     | 145 kDa | 0   | 0   | 0   | 3   | 0   | 0   | 0   | 1   | 0   | 0.4226 | -      | 0.0  | -   |
| DAG1 Dystroglycan                                             | IPI00028911     | 98 kDa  | 24  | 21  | 8   | 8   | 0   | 0   | 22  | 8   | 0   | 0.0000 | 0.0053 | 0.0  | 0.0 |
| DBI Isoform a 1 of Acyl-CoA-binding protein                   | IPI00010182     | 10 kDa  | 4   | 0   | 6   | 0   | 4   | 4   | 2   | 3   | 4   | 0.8212 | 0.4991 | 1.3  | 1.8 |
| DCD Dermcidin                                                 | IPI00027547     | 11 kDa  | 4   | 9   | 13  | 0   | 0   | 5   | 7   | 6   | 2   | 0.6153 | 0.3513 | 0.4  | 0.4 |
| DCHS1 Protocadherin-16                                        | IPI00064262     | 346 kDa | 18  | 13  | 9   | 0   | 0   | 0   | 15  | 5   | 0   | 0.4226 | 0.0289 | 0.0  | 0.0 |
| DDAH2 N(G),N(G)-dimethylarginine dimethylaminohydrola         | IPI00000760     | 30 kDa  | 11  | 12  | 0   | 0   | 4   | 4   | 11  | 0   | 4   | 0.0006 | 0.0013 | -    | 0.3 |
| DDC Aromatic-L-amino-acid decarboxylase                       | IPI00025394     | 54 kDa  | 10  | 9   | 0   | 0   | 0   | 0   | 10  | 0   | 0   | -      | 0.0017 | -    | 0.0 |
| DDT D-dopachrome decarboxylase                                | IPI00293867     | 13 kDa  | 9   | 8   | 0   | 5   | 5   | 5   | 9   | 3   | 5   | 0.5168 | 0.0169 | 1.8  | 0.6 |
| DEFA1;LOC728358 Neutrophil defensin 1                         | IPI00005721     | 10 kDa  | 30  | 31  | 212 | 210 | 26  | 28  | 31  | 211 | 27  | 0.0001 | 0.1187 | 0.1  | 0.9 |
| DEFB1 Beta-defensin 1                                         | IPI00022290     | 7 kDa   | 6   | 8   | 6   | 7   | 5   | 6   | 7   | 6   | 5   | 0.3416 | 0.2958 | 0.9  | 0.8 |
| DLK1 Isoform Long of Protein delta homolog 1                  | IPI00160384     | 41 kDa  | 20  | 24  | 34  | 42  | 7   | 0   | 22  | 38  | 4   | 0.0268 | 0.0502 | 0.1  | 0.2 |
| DLK2 Isoform 1 of Protein delta homolog 2                     | IPI00028381     | 41 kDa  | 0   | 0   | 3   | 5   | 0   | 0   | 0   | 4   | 0   | 0.0456 | -      | 0.0  | -   |
| DLST Full-length cDNA 5-PRIME end of clone CS0DJ009YL1        | IPI00384016     | 30 kDa  | 5   | 0   | 0   | 5   | 5   | 6   | 3   | 3   | 5   | 0.4289 | 0.3668 | 2.0  | 2.2 |
| DNAH5 Dynein heavy chain 5, axonemal                          | rev_IPI00152653 | 529 kDa | 0   | 0   | 0   | 0   | 7   | 0   | 0   | 0   | 4   | 0.4226 | 0.4226 | -    | -   |
| DNASE1 Deoxyribonuclease-1                                    | IPI00031065     | 31 kDa  | 43  | 43  | 35  | 38  | 24  | 30  | 43  | 36  | 27  | 0.1022 | 0.0319 | 0.7  | 0.6 |
| DNASE2 Deoxyribonuclease-2-alpha                              | IPI00010348     | 40 kDa  | 7   | 5   | 0   | 0   | 0   | 0   | 6   | 0   | 0   | -      | 0.0400 | -    | 0.0 |
| DNER Delta and Notch-like epidermal growth factor-relate      | IPI00333140     | 78 kDa  | 8   | 8   | 17  | 20  | 10  | 7   | 8   | 19  | 9   | 0.0384 | 0.7645 | 0.5  | 1.1 |
| DPEP1 Dipeptidase 1                                           | IPI00059476     | 46 kDa  | 20  | 32  | 14  | 7   | 4   | 9   | 26  | 10  | 7   | 0.4962 | 0.1019 | 0.6  | 0.3 |
| DPP4 Dipeptidyl peptidase 4                                   | IPI00018953     | 88 kDa  | 144 | 160 | 71  | 59  | 246 | 238 | 152 | 65  | 242 | 0.0017 | 0.0102 | 3.7  | 1.6 |
| DPP7 Dipeptidyl-peptidase 2                                   | IPI00296141     | 54 kDa  | 48  | 44  | 5   | 5   | 36  | 27  | 46  | 5   | 32  | 0.0270 | 0.1012 | 6.3  | 0.7 |
| DPT Dermatopontin                                             | IPI00292130     | 24 kDa  | 27  | 30  | 27  | 27  | 36  | 28  | 28  | 27  | 32  | 0.3043 | 0.4595 | 1.2  | 1.1 |
| DSC1 desmocollin 1 isoform Dsc1b preproprotein                | IPI00007425     | 94 kDa  | 0   | 0   | 2   | 0   | 0   | 0   | 0   | 1   | 0   | 0.4226 | -      | 0.0  | -   |
| DSC2 cDNA FLJ55716, highly similar to Desmocollin-2           | IPI00025846     | 101 kDa | 40  | 29  | 7   | 5   | 57  | 65  | 34  | 6   | 61  | 0.0052 | 0.0595 | 9.9  | 1.8 |
| DSG1 Desmoglein-1                                             | IPI00025753     | 114 kDa | 7   | 0   | 0   | 0   | 14  | 0   | 4   | 0   | 7   | 0.4226 | 0.7062 | -    | 2.0 |
| DSG2 Desmoglein-2                                             | IPI00028931     | 122 kDa | 3   | 7   | 0   | 0   | 11  | 0   | 5   | 0   | 6   | 0.4226 | 0.9238 | -    | 1.1 |
| DSP Isoform DPI of Desmoplakin                                | IPI00013933     | 332 kDa | 13  | 13  | 3   | 7   | 21  | 4   | 13  | 5   | 12  | 0.5056 | 0.9606 | 2.4  | 1.0 |
| DSTN Destrin                                                  | IPI00473014     | 19 kDa  | 0   | 2   | 3   | 0   | 0   | 0   | 1   | 2   | 0   | 0.4226 | 0.4226 | 0.0  | 0.0 |
| EEF1A1 Elongation factor 1-alpha 1                            | IPI00396485     | 50 kDa  | 16  | 13  | 22  | 19  | 14  | 7   | 14  | 21  | 10  | 0.1065 | 0.3967 | 0.5  | 0.7 |
| EFEMP1 Isoform 1 of EGF-containing fibulin-like extracellul   | IPI00029658     | 55 kDa  | 205 | 206 | 207 | 212 | 88  | 95  | 206 | 210 | 91  | 0.0012 | 0.0008 | 0.4  | 0.4 |
| EFEMP2 EGF-containing fibulin-like extracellular matrix prc   | IPI00296058     | 49 kDa  | 16  | 18  | 12  | 10  | 10  | 11  | 17  | 11  | 10  | 0.8316 | 0.0317 | 1.0  | 0.6 |
| EFHD2 EF-hand domain-containing protein D2                    | IPI00060181     | 27 kDa  | 0   | 0   | 13  | 18  | 0   | 0   | 0   | 15  | 0   | 0.0256 | -      | 0.0  | -   |
| EFNA1 Isoform 1 of Ephrin-A1                                  | IPI00025840     | 24 kDa  | 6   | 6   | 7   | 7   | 0   | 0   | 6   | 7   | 0   | 0.0001 | 0.0004 | 0.0  | 0.0 |
| EFNB1 Ephrin-B1                                               | IPI00024307     | 38 kDa  | 12  | 14  | 8   | 12  | 12  | 17  | 13  | 10  | 14  | 0.2779 | 0.5547 | 1.4  | 1.1 |
| EGF Pro-epidermal growth factor                               | IPI00000073     | 134 kDa | 596 | 637 | 850 | 914 | 395 | 362 | 617 | 882 | 379 | 0.0051 | 0.0122 | 0.4  | 0.6 |
| EHD1 EH domain-containing protein 1                           | IPI00017184     | 61 kDa  | 3   | 2   | 0   | 0   | 0   | 0   | 3   | 0   | 0   | -      | 0.0168 | -    | 0.0 |
| EIF5A Isoform 2 of Eukaryotic translation initiation factor 5 | IPI00376005     | 20 kDa  | 0   | 2   | 2   | 5   | 0   | 0   | 1   | 4   | 0   | 0.1314 | 0.4226 | 0.0  | 0.0 |
| EIF6 Eukaryotic translation initiation factor 6               | IPI00010105     | 27 kDa  | 7   | 10  | 7   | 0   | 6   | 6   | 9   | 3   | 6   | 0.5338 | 0.2615 | 1.7  | 0.7 |
| ELA2 Leukocyte elastase                                       | IPI00027769     | 29 kDa  | 6   | 0   | 269 | 227 | 21  | 18  | 3   | 248 | 19  | 0.0081 | 0.0414 | 0.1  | 6.5 |
| ENDOD1 Endonuclease domain-containing 1 protein               | IPI00001952     | 55 kDa  | 20  | 24  | 7   | 0   | 24  | 33  | 22  | 3   | 28  | 0.0514 | 0.3496 | 8.2  | 1.3 |
| ENG Isoform Long of Endoglin                                  | IPI00017567     | 71 kDa  | 5   | 0   | 0   | 0   | 0   | 0   | 3   | 0   | 0   | -      | 0.4226 | -    | 0.0 |
| ENO1 Isoform alpha-enolase of Alpha-enolase                   | IPI00465248     | 47 kDa  | 49  | 44  | 80  | 82  | 17  | 27  | 46  | 81  | 22  | 0.0071 | 0.0491 | 0.3  | 0.5 |
| ENPEP Glutaryl aminopeptidase                                 | IPI00014375     | 109 kDa | 105 | 114 | 3   | 7   | 211 | 240 | 110 | 5   | 226 | 0.0042 | 0.0162 | 43.9 | 2.1 |
| ENPP2 Isoform 2 of Ectonucleotide pyrophosphatase/phos        | IPI00303210     | 105 kDa | 3   | 0   | 0   | 0   | 0   | 0   | 2   | 0   | 0   | -      | 0.4226 | -    | 0.0 |
| ENPP4 Ectonucleotide pyrophosphatase/phosphodiesterase        | IPI00007249     | 52 kDa  | 0   | 0   | 0   | 0   | 7   | 6   | 0   | 0   | 7   | 0.0132 | 0.0132 | -    | -   |
| EPHA1 Ephrin type-A receptor 1                                | IPI00294250     | 108 kDa | 3   | 0   | 0   | 0   | 4   | 0   | 2   | 0   | 2   | 0.4226 | 0.8926 | -    | 1.2 |

|                                                                    |             |         |    |     |     |     |    |    |    |     |    |        |        |     |     |
|--------------------------------------------------------------------|-------------|---------|----|-----|-----|-----|----|----|----|-----|----|--------|--------|-----|-----|
| EPHA2 Ephrin type-A receptor 2                                     | IPI00021267 | 108 kDa | 0  | 0   | 0   | 0   | 0  | 4  | 0  | 0   | 2  | 0.4226 | 0.4226 | -   | -   |
| EPHA4 Ephrin type-A receptor 4                                     | IPI00008318 | 110 kDa | 0  | 0   | 0   | 0   | 10 | 6  | 0  | 0   | 8  | 0.0592 | 0.0592 | -   | -   |
| EPHA7 Isoform 1 of Ephrin type-A receptor 7                        | IPI00016645 | 112 kDa | 0  | 0   | 0   | 0   | 0  | 4  | 0  | 0   | 2  | 0.4226 | 0.4226 | -   | -   |
| EPHB2 Isoform 1 of Ephrin type-B receptor 2                        | IPI00021275 | 117 kDa | 12 | 16  | 5   | 0   | 7  | 8  | 14 | 2   | 8  | 0.1420 | 0.0985 | 3.4 | 0.6 |
| EPHB3 Ephrin type-B receptor 3                                     | IPI00289329 | 110 kDa | 6  | 0   | 0   | 0   | 0  | 0  | 3  | 0   | 0  | -      | 0.4226 | -   | 0.0 |
| EPHB4 Ephrin receptor                                              | IPI00186826 | 103 kDa | 24 | 23  | 14  | 8   | 22 | 19 | 24 | 11  | 21 | 0.1028 | 0.2524 | 1.9 | 0.9 |
| EPHB6 Ephrin type-B receptor 6                                     | IPI00005222 | 111 kDa | 8  | 8   | 0   | 0   | 0  | 0  | 8  | 0   | 0  | -      | 0.0000 | -   | 0.0 |
| EPS8 Epidermal growth factor receptor kinase substrate 8           | IPI00290337 | 92 kDa  | 4  | 3   | 5   | 0   | 0  | 2  | 4  | 2   | 1  | 0.7054 | 0.1707 | 0.5 | 0.3 |
| EPS8L2 Isoform 1 of Epidermal growth factor receptor kinase        | IPI00414315 | 81 kDa  | 7  | 2   | 0   | 0   | 0  | 0  | 5  | 0   | 0  | -      | 0.1861 | -   | 0.0 |
| ERO1L ERO1-like protein alpha                                      | IPI00386755 | 54 kDa  | 0  | 0   | 0   | 5   | 0  | 0  | 0  | 3   | 0  | 0.4226 | -      | 0.0 | -   |
| ESAM Endothelial cell-selective adhesion molecule                  | IPI00303161 | 41 kDa  | 18 | 14  | 13  | 20  | 15 | 13 | 16 | 17  | 14 | 0.5770 | 0.4861 | 0.8 | 0.9 |
| EVPL Envoplakin                                                    | IPI00023711 | 232 kDa | 0  | 0   | 0   | 0   | 0  | 9  | 0  | 0   | 5  | 0.4226 | 0.4226 | -   | -   |
| EZR Ezrin                                                          | IPI00746388 | 69 kDa  | 65 | 60  | 110 | 74  | 56 | 48 | 62 | 92  | 52 | 0.1675 | 0.1527 | 0.6 | 0.8 |
| F11R Junctional adhesion molecule A                                | IPI00001754 | 33 kDa  | 11 | 13  | 6   | 8   | 16 | 14 | 12 | 7   | 15 | 0.0339 | 0.1233 | 2.2 | 1.3 |
| F12 Coagulation factor XII                                         | IPI00019581 | 68 kDa  | 4  | 7   | 0   | 0   | 0  | 0  | 5  | 0   | 0  | -      | 0.0644 | -   | 0.0 |
| F2 Prothrombin (Fragment)                                          | IPI00019568 | 70 kDa  | 71 | 104 | 102 | 138 | 14 | 17 | 87 | 120 | 15 | 0.0280 | 0.0479 | 0.1 | 0.2 |
| FABP1 FABP1 protein (Fragment)                                     | IPI00010290 | 15 kDa  | 3  | 9   | 3   | 5   | 11 | 12 | 6  | 4   | 12 | 0.0209 | 0.2260 | 2.6 | 1.9 |
| FABP2 Fatty acid-binding protein, intestinal                       | IPI00218477 | 15 kDa  | 2  | 0   | 0   | 0   | 4  | 0  | 1  | 0   | 2  | 0.4226 | 0.7222 | -   | 1.9 |
| FABP3 Fatty acid-binding protein, heart                            | IPI00219684 | 15 kDa  | 16 | 15  | 10  | 11  | 24 | 21 | 15 | 11  | 22 | 0.0102 | 0.0323 | 2.1 | 1.4 |
| FABP5;FABP5L7 Fatty acid-binding protein, epidermal                | IPI00007797 | 15 kDa  | 41 | 36  | 97  | 89  | 32 | 31 | 38 | 93  | 32 | 0.0052 | 0.1324 | 0.3 | 0.8 |
| FAH Fumarylacetoacetase                                            | IPI00031708 | 46 kDa  | 12 | 8   | 0   | 0   | 0  | 4  | 10 | 0   | 2  | 0.4226 | 0.0893 | -   | 0.2 |
| FAM151A Isoform 2 of Protein FAM151A                               | IPI00064917 | 44 kDa  | 0  | 0   | 0   | 0   | 0  | 7  | 0  | 0   | 4  | 0.4226 | 0.4226 | -   | -   |
| FAM3B Isoform B of Protein FAM3B                                   | IPI00067738 | 26 kDa  | 0  | 3   | 5   | 5   | 0  | 0  | 2  | 5   | 0  | 0.0065 | 0.4226 | 0.0 | 0.0 |
| FAM3C Protein FAM3C                                                | IPI00334282 | 25 kDa  | 24 | 18  | 15  | 14  | 0  | 4  | 21 | 14  | 2  | 0.0224 | 0.0276 | 0.1 | 0.1 |
| FAT4 Isoform 1 of Protocadherin Fat 4                              | IPI00852735 | 543 kDa | 40 | 30  | 0   | 0   | 0  | 0  | 35 | 0   | 0  | -      | 0.0200 | -   | 0.0 |
| FBLN1 Isoform C of Fibulin-1                                       | IPI00296537 | 74 kDa  | 42 | 41  | 53  | 34  | 40 | 35 | 42 | 44  | 38 | 0.6032 | 0.2010 | 0.9 | 0.9 |
| FBLN2 fibulin 2 isoform a precursor                                | IPI00465038 | 132 kDa | 62 | 55  | 51  | 74  | 0  | 0  | 59 | 62  | 0  | 0.0314 | 0.0033 | 0.0 | 0.0 |
| FBLN5 Fibulin-5                                                    | IPI00294615 | 50 kDa  | 22 | 17  | 19  | 7   | 17 | 15 | 20 | 13  | 16 | 0.5951 | 0.3339 | 1.3 | 0.8 |
| FBLN7 Isoform 1 of Fibulin-7                                       | IPI00167710 | 47 kDa  | 8  | 8   | 8   | 7   | 0  | 0  | 8  | 7   | 0  | 0.0075 | 0.0000 | 0.0 | 0.0 |
| FBN1 Fibrillin-1                                                   | IPI00328113 | 312 kDa | 94 | 83  | 101 | 120 | 63 | 73 | 88 | 110 | 68 | 0.0599 | 0.1132 | 0.6 | 0.8 |
| FBP1 Fructose-1,6-bisphosphatase 1                                 | IPI00073772 | 37 kDa  | 16 | 15  | 5   | 0   | 14 | 18 | 15 | 2   | 16 | 0.0489 | 0.9261 | 6.8 | 1.0 |
| FCER2 Isoform A of Low affinity immunoglobulin epsilon Fc receptor | IPI00027491 | 36 kDa  | 34 | 22  | 35  | 18  | 9  | 11 | 28 | 26  | 10 | 0.1933 | 0.0966 | 0.4 | 0.3 |
| FCGBP IgG Fc-binding protein                                       | IPI00242956 | 572 kDa | 6  | 7   | 8   | 8   | 0  | 0  | 6  | 8   | 0  | 0.0000 | 0.0049 | 0.0 | 0.0 |
| FCGR3A Low affinity immunoglobulin gamma Fc region receptor 3A     | IPI00218834 | 29 kDa  | 51 | 47  | 65  | 71  | 49 | 52 | 49 | 68  | 50 | 0.0368 | 0.7001 | 0.7 | 1.0 |
| FCGR3B Fc-gamma receptor IIIb                                      | IPI00023858 | 30 kDa  | 0  | 0   | 35  | 27  | 25 | 27 | 0  | 31  | 26 | 0.3341 | 0.0020 | 0.8 | -   |
| FCN2 Isoform 1 of Ficolin-2                                        | IPI00017530 | 34 kDa  | 6  | 10  | 0   | 0   | 2  | 4  | 8  | 0   | 3  | 0.0294 | 0.1482 | -   | 0.4 |
| FDX1 Adrenodoxin, mitochondrial                                    | IPI00019326 | 19 kDa  | 0  | 3   | 0   | 0   | 0  | 0  | 2  | 0   | 0  | -      | 0.4226 | -   | 0.0 |
| FGA Isoform 1 of Fibrinogen alpha chain                            | IPI00021885 | 95 kDa  | 44 | 43  | 34  | 50  | 21 | 48 | 43 | 42  | 35 | 0.6984 | 0.5975 | 0.8 | 0.8 |
| FGB Fibrinogen beta chain                                          | IPI00298497 | 56 kDa  | 5  | 5   | 10  | 5   | 4  | 4  | 5  | 8   | 4  | 0.2265 | 0.0329 | 0.5 | 0.8 |
| FGG Isoform Gamma-B of Fibrinogen gamma chain                      | IPI00021891 | 52 kDa  | 15 | 12  | 9   | 18  | 7  | 14 | 13 | 13  | 11 | 0.6710 | 0.5859 | 0.8 | 0.8 |
| FKBP1A Peptidyl-prolyl cis-trans isomerase FKBP1A                  | IPI00873810 | 12 kDa  | 0  | 2   | 3   | 5   | 0  | 0  | 1  | 4   | 0  | 0.0456 | 0.4226 | 0.0 | 0.0 |
| FLG Filaggrin                                                      | IPI00026256 | 435 kDa | 0  | 0   | 0   | 0   | 4  | 0  | 0  | 0   | 2  | 0.4226 | 0.4226 | -   | -   |
| FLG2 Filaggrin-2                                                   | IPI00397801 | 248 kDa | 0  | 6   | 7   | 0   | 4  | 0  | 3  | 3   | 2  | 0.7229 | 0.7954 | 0.5 | 0.6 |
| FLJ22662 hypothetical protein LOC79887                             | IPI00016255 | 63 kDa  | 0  | 0   | 6   | 4   | 0  | 0  | 0  | 5   | 0  | 0.0285 | -      | 0.0 | -   |
| FLJ45139 cDNA FLJ45139 fis, clone BRAWH3039623                     | IPI00418931 | 15 kDa  | 0  | 13  | 0   | 0   | 0  | 0  | 6  | 0   | 0  | -      | 0.4226 | -   | 0.0 |
| FLNA Isoform 2 of Filamin-A                                        | IPI00302592 | 280 kDa | 14 | 20  | 12  | 29  | 9  | 18 | 17 | 20  | 13 | 0.5498 | 0.5702 | 0.7 | 0.8 |
| FLNB Isoform 1 of Filamin-B                                        | IPI00289334 | 278 kDa | 0  | 0   | 0   | 0   | 0  | 5  | 0  | 0   | 2  | 0.4226 | 0.4226 | -   | -   |

|                                                           |             |         |     |     |     |     |     |     |     |     |     |        |        |      |     |
|-----------------------------------------------------------|-------------|---------|-----|-----|-----|-----|-----|-----|-----|-----|-----|--------|--------|------|-----|
| FLNC Isoform 1 of Filamin-C                               | IPI00178352 | 291 kDa | 10  | 14  | 6   | 11  | 5   | 13  | 12  | 8   | 9   | 0.9042 | 0.5785 | 1.1  | 0.8 |
| FLOT1 Flotillin-1                                         | IPI00027438 | 47 kDa  | 3   | 2   | 0   | 0   | 0   | 0   | 3   | 0   | 0   | -      | 0.0168 | -    | 0.0 |
| FLOT2 flotillin 2                                         | IPI00789008 | 47 kDa  | 0   | 0   | 0   | 0   | 0   | 2   | 0   | 0   | 1   | 0.4226 | 0.4226 | -    | -   |
| FLRT2 Leucine-rich repeat transmembrane protein FLRT2     | IPI00001633 | 74 kDa  | 2   | 0   | 0   | 0   | 0   | 0   | 1   | 0   | 0   | -      | 0.4226 | -    | 0.0 |
| FN1 fibronectin 1 isoform 4 preproprotein                 | IPI00414283 | 257 kDa | 274 | 270 | 264 | 312 | 251 | 251 | 272 | 288 | 251 | 0.2624 | 0.0114 | 0.9  | 0.9 |
| FOLR1 Folate receptor alpha                               | IPI00441498 | 30 kDa  | 63  | 54  | 51  | 57  | 17  | 19  | 59  | 54  | 18  | 0.0079 | 0.0121 | 0.3  | 0.3 |
| FOLR3 folate receptor 3 precursor                         | IPI00014287 | 28 kDa  | 2   | 0   | 0   | 0   | 0   | 0   | 1   | 0   | 0   | -      | 0.4226 | -    | 0.0 |
| FREM2 Isoform 1 of FRAS1-related extracellular matrix pro | IPI00180707 | 351 kDa | 102 | 65  | 0   | 0   | 0   | 0   | 83  | 0   | 0   | -      | 0.0471 | -    | 0.0 |
| FRK Tyrosine-protein kinase FRK                           | IPI00000885 | 58 kDa  | 2   | 0   | 2   | 0   | 0   | 0   | 1   | 1   | 0   | 0.4226 | 0.4226 | 0.0  | 0.0 |
| FSHB Follitropin subunit beta                             | IPI00000853 | 15 kDa  | 22  | 28  | 32  | 26  | 0   | 9   | 25  | 29  | 5   | 0.0512 | 0.0676 | 0.2  | 0.2 |
| FSTL1 Follistatin-related protein 1                       | IPI00029723 | 35 kDa  | 15  | 8   | 8   | 7   | 0   | 0   | 12  | 7   | 0   | 0.0075 | 0.0798 | 0.0  | 0.0 |
| FTH1 Ferritin heavy chain                                 | IPI00554521 | 21 kDa  | 12  | 12  | 7   | 10  | 56  | 40  | 12  | 8   | 48  | 0.0380 | 0.0441 | 5.8  | 4.1 |
| FTL Ferritin                                              | IPI00375676 | 21 kDa  | 16  | 10  | 14  | 12  | 87  | 85  | 13  | 13  | 86  | 0.0003 | 0.0017 | 6.6  | 6.5 |
| FUCA1 Tissue alpha-L-fucosidase                           | IPI00843910 | 54 kDa  | 2   | 0   | 0   | 0   | 9   | 8   | 1   | 0   | 8   | 0.0006 | 0.0181 | -    | 8.5 |
| FZD2 Frizzled-2                                           | IPI00016027 | 64 kDa  | 0   | 0   | 0   | 3   | 2   | 0   | 0   | 1   | 1   | 0.9548 | 0.4226 | 0.9  | -   |
| FZD4 Frizzled-4 precursor                                 | IPI00297420 | 60 kDa  | 8   | 9   | 0   | 0   | 5   | 0   | 9   | 0   | 2   | 0.4226 | 0.1394 | -    | 0.3 |
| G6PD glucose-6-phosphate dehydrogenase isoform a          | IPI00853547 | 62 kDa  | 0   | 0   | 8   | 0   | 0   | 0   | 0   | 4   | 0   | 0.4226 | -      | 0.0  | -   |
| GAA acid alpha-glucosidase preproprotein                  | IPI00883772 | 105 kDa | 283 | 316 | 176 | 158 | 341 | 338 | 299 | 167 | 339 | 0.0028 | 0.1338 | 2.0  | 1.1 |
| GAA Lysosomal alpha-glucosidase                           | IPI00293088 | 105 kDa | 319 | 362 | 191 | 173 | 330 | 343 | 340 | 182 | 336 | 0.0052 | 0.8698 | 1.8  | 1.0 |
| GALM Aldose 1-epimerase                                   | IPI00060200 | 38 kDa  | 4   | 5   | 0   | 0   | 0   | 0   | 4   | 0   | 0   | -      | 0.0049 | -    | 0.0 |
| GALNS N-acetylgalactosamine-6-sulfatase                   | IPI00029605 | 58 kDa  | 10  | 10  | 0   | 0   | 19  | 22  | 10  | 0   | 21  | 0.0085 | 0.0323 | -    | 2.0 |
| GALNTL4 Isoform 1 of Putative polypeptide N-acetylgalact  | IPI00168626 | 70 kDa  | 2   | 5   | 0   | 0   | 0   | 0   | 3   | 0   | 0   | -      | 0.1268 | -    | 0.0 |
| GAPDH Glyceraldehyde-3-phosphate dehydrogenase            | IPI00219018 | 36 kDa  | 32  | 31  | 44  | 56  | 25  | 21  | 32  | 50  | 23  | 0.0492 | 0.0446 | 0.5  | 0.7 |
| GC vitamin D-binding protein precursor                    | IPI00742696 | 53 kDa  | 80  | 81  | 96  | 48  | 57  | 57  | 80  | 72  | 57  | 0.6010 | 0.0003 | 0.8  | 0.7 |
| GCHFR GTP cyclohydrolase 1 feedback regulatory protein    | IPI00217253 | 10 kDa  | 11  | 17  | 8   | 5   | 9   | 11  | 14  | 7   | 10  | 0.2199 | 0.3069 | 1.4  | 0.7 |
| GDA Guanine deaminase                                     | IPI00644409 | 46 kDa  | 0   | 2   | 0   | 0   | 0   | 0   | 1   | 0   | 0   | -      | 0.4226 | -    | 0.0 |
| GDF15 Growth/differentiation factor 15                    | IPI00306543 | 34 kDa  | 11  | 6   | 2   | 0   | 9   | 6   | 8   | 1   | 7   | 0.0771 | 0.7528 | 6.3  | 0.9 |
| GDI2 cDNA FLJ60299, highly similar to Rab GDP dissociator | IPI00031461 | 51 kDa  | 11  | 3   | 13  | 7   | 0   | 0   | 7   | 10  | 0   | 0.0809 | 0.1954 | 0.0  | 0.0 |
| GGCT Isoform 1 of Gamma-glutamylcyclotransferase          | IPI00031564 | 21 kDa  | 9   | 6   | 20  | 16  | 7   | 6   | 7   | 18  | 7   | 0.0254 | 0.7367 | 0.4  | 0.9 |
| GGH Gamma-glutamyl hydrolase                              | IPI00023728 | 36 kDa  | 24  | 33  | 10  | 11  | 76  | 63  | 29  | 11  | 69  | 0.0125 | 0.0377 | 6.5  | 2.4 |
| GGT1 Isoform 1 of Gamma-glutamyltranspeptidase 1          | IPI00018901 | 61 kDa  | 21  | 20  | 0   | 0   | 0   | 0   | 20  | 0   | 0   | -      | 0.0012 | -    | 0.0 |
| GGT6 cDNA FLJ50980                                        | IPI00440764 | 51 kDa  | 0   | 3   | 0   | 0   | 0   | 0   | 2   | 0   | 0   | -      | 0.4226 | -    | 0.0 |
| GLA Alpha-galactosidase A                                 | IPI00025869 | 49 kDa  | 15  | 12  | 5   | 4   | 31  | 31  | 13  | 4   | 31  | 0.0002 | 0.0097 | 7.1  | 2.3 |
| GLB1 galactosidase, beta 1 isoform b                      | IPI00797646 | 73 kDa  | 66  | 62  | 6   | 4   | 73  | 70  | 64  | 5   | 72  | 0.0009 | 0.1049 | 14.5 | 1.1 |
| GLG1 Isoform 2 of Golgi apparatus protein 1               | IPI00414717 | 137 kDa | 40  | 47  | 9   | 14  | 11  | 4   | 44  | 11  | 7   | 0.4526 | 0.0204 | 0.6  | 0.2 |
| GLO1 Lactoylglutathione lyase                             | IPI00220766 | 21 kDa  | 3   | 0   | 2   | 3   | 0   | 0   | 2   | 3   | 0   | 0.0065 | 0.4226 | 0.0  | 0.0 |
| GLOD4 Uncharacterized protein C17orf25                    | IPI00007102 | 55 kDa  | 2   | 3   | 0   | 0   | 0   | 0   | 3   | 0   | 0   | -      | 0.0644 | -    | 0.0 |
| GLRX Glutaredoxin-1                                       | IPI00219025 | 12 kDa  | 4   | 2   | 3   | 10  | 9   | 12  | 3   | 7   | 10  | 0.3847 | 0.0569 | 1.6  | 3.3 |
| GLTP Glycolipid transfer protein                          | IPI00184363 | 24 kDa  | 0   | 5   | 0   | 0   | 0   | 0   | 2   | 0   | 0   | -      | 0.4226 | -    | 0.0 |
| GLUD1 Glutamate dehydrogenase 1, mitochondrial            | IPI00016801 | 61 kDa  | 0   | 2   | 0   | 0   | 5   | 2   | 1   | 0   | 4   | 0.1067 | 0.2850 | -    | 3.2 |
| GLUL Glutamine synthetase                                 | IPI00010130 | 42 kDa  | 0   | 0   | 22  | 15  | 0   | 0   | 0   | 18  | 0   | 0.0342 | -      | 0.0  | -   |
| GM2A Ganglioside GM2 activator                            | IPI00018236 | 21 kDa  | 70  | 66  | 16  | 30  | 163 | 170 | 68  | 23  | 167 | 0.0029 | 0.0018 | 7.2  | 2.5 |
| GMFG Glia maturation factor gamma                         | IPI00028414 | 17 kDa  | 0   | 0   | 0   | 5   | 0   | 0   | 0   | 3   | 0   | 0.4226 | -      | 0.0  | -   |
| GNA11 Guanine nucleotide-binding protein subunit alpha-   | IPI00305551 | 42 kDa  | 4   | 0   | 3   | 3   | 0   | 0   | 2   | 3   | 0   | 0.0143 | 0.4226 | 0.0  | 0.0 |
| GNA13 Guanine nucleotide-binding protein subunit alpha-   | IPI00290928 | 44 kDa  | 3   | 0   | 0   | 0   | 0   | 0   | 2   | 0   | 0   | -      | 0.4226 | -    | 0.0 |
| GNAI1 Guanine nucleotide-binding protein G(i), alpha-1 su | IPI00337415 | 40 kDa  | 13  | 6   | 8   | 4   | 5   | 0   | 9   | 6   | 2   | 0.3764 | 0.2572 | 0.4  | 0.3 |
| GNAI2 Galphai2 protein                                    | IPI00465121 | 42 kDa  | 8   | 0   | 10  | 10  | 0   | 0   | 4   | 10  | 0   | 0.0020 | 0.4226 | 0.0  | 0.0 |

|                                                             |             |         |     |     |     |     |     |     |     |     |     |        |        |      |     |
|-------------------------------------------------------------|-------------|---------|-----|-----|-----|-----|-----|-----|-----|-----|-----|--------|--------|------|-----|
| GNAI3 Guanine nucleotide-binding protein G(k) subunit alpha | IPI00220578 | 41 kDa  | 10  | 0   | 0   | 0   | 0   | 0   | 5   | 0   | 0   | -      | 0.4226 | -    | 0.0 |
| GNAS Isoform XLas-1 of Guanine nucleotide-binding protei    | IPI00095891 | 111 kDa | 4   | 7   | 6   | 4   | 0   | 0   | 5   | 5   | 0   | 0.0285 | 0.0644 | 0.0  | 0.0 |
| GNB1 Guanine nucleotide-binding protein G(l)/G(S)/G(T) s    | IPI00026268 | 37 kDa  | 12  | 12  | 27  | 34  | 0   | 7   | 12  | 30  | 4   | 0.0348 | 0.1471 | 0.1  | 0.3 |
| GNB2 Guanine nucleotide-binding protein G(l)/G(S)/G(T) s    | IPI00003348 | 37 kDa  | 0   | 10  | 29  | 31  | 0   | 0   | 5   | 30  | 0   | 0.0016 | 0.4226 | 0.0  | 0.0 |
| GNG12 Guanine nucleotide-binding protein G(l)/G(S)/G(O)     | IPI00221232 | 8 kDa   | 0   | 7   | 0   | 0   | 2   | 2   | 3   | 0   | 2   | 0.0006 | 0.7938 | -    | 0.7 |
| GNS N-acetylglucosamine-6-sulfatase                         | IPI00012102 | 62 kDa  | 65  | 66  | 13  | 10  | 160 | 167 | 65  | 11  | 164 | 0.0005 | 0.0010 | 14.7 | 2.5 |
| GOLM1 Golgi membrane protein 1                              | IPI00171411 | 46 kDa  | 59  | 54  | 66  | 64  | 27  | 39  | 57  | 65  | 33  | 0.0328 | 0.0657 | 0.5  | 0.6 |
| GOT1 Aspartate aminotransferase, cytoplasmic                | IPI00219029 | 46 kDa  | 12  | 10  | 0   | 0   | 0   | 0   | 11  | 0   | 0   | -      | 0.0053 | -    | 0.0 |
| GP1BA platelet glycoprotein Ib alpha polypeptide precurs    | IPI00748955 | 70 kDa  | 11  | 8   | 0   | 0   | 24  | 28  | 10  | 0   | 26  | 0.0082 | 0.0275 | -    | 2.7 |
| GP6 Isoform 3 of Platelet glycoprotein VI                   | IPI00102300 | 67 kDa  | 21  | 18  | 19  | 20  | 20  | 15  | 20  | 19  | 18  | 0.5317 | 0.5080 | 0.9  | 0.9 |
| GPC1 Glypican-1                                             | IPI00015688 | 62 kDa  | 10  | 9   | 8   | 4   | 0   | 0   | 10  | 6   | 0   | 0.0937 | 0.0017 | 0.0  | 0.0 |
| GPC3 Glypican-3                                             | IPI00019907 | 66 kDa  | 18  | 15  | 23  | 23  | 0   | 0   | 16  | 23  | 0   | 0.0000 | 0.0083 | 0.0  | 0.0 |
| GPC4 Glypican-4                                             | IPI00232571 | 62 kDa  | 8   | 7   | 8   | 15  | 0   | 0   | 7   | 12  | 0   | 0.0784 | 0.0053 | 0.0  | 0.0 |
| GPD1 Glycerol-3-phosphate dehydrogenase [NAD+], cytop       | IPI00295777 | 38 kDa  | 5   | 3   | 0   | 0   | 0   | 0   | 4   | 0   | 0   | -      | 0.0318 | -    | 0.0 |
| GPI Glucose-6-phosphate isomerase                           | IPI00027497 | 63 kDa  | 2   | 7   | 5   | 0   | 0   | 0   | 4   | 2   | 0   | 0.4226 | 0.2113 | 0.0  | 0.0 |
| GPR116 Isoform 1 of Probable G-protein coupled receptor     | IPI00437186 | 149 kDa | 13  | 7   | 0   | 7   | 0   | 0   | 10  | 3   | 0   | 0.4226 | 0.0821 | 0.0  | 0.0 |
| GPR180 Integral membrane protein GPR180                     | IPI00646291 | 49 kDa  | 8   | 0   | 0   | 7   | 0   | 0   | 4   | 3   | 0   | 0.4226 | 0.4226 | 0.0  | 0.0 |
| GPR56 Isoform 2 of G-protein coupled receptor 56            | IPI00397949 | 77 kDa  | 0   | 5   | 0   | 0   | 0   | 0   | 2   | 0   | 0   | -      | 0.4226 | -    | 0.0 |
| GPRC5A Retinoic acid-induced protein 3                      | IPI00022624 | 40 kDa  | 0   | 0   | 8   | 0   | 0   | 0   | 0   | 4   | 0   | 0.4226 | -      | 0.0  | -   |
| GPRC5B G-protein coupled receptor family C group 5 mem      | IPI00008239 | 45 kDa  | 49  | 33  | 51  | 41  | 4   | 5   | 41  | 46  | 4   | 0.0145 | 0.0419 | 0.1  | 0.1 |
| GPRC5C cDNA FLJ20242 fis, clone COLF6369                    | IPI00004901 | 18 kDa  | 102 | 86  | 80  | 61  | 46  | 50  | 94  | 71  | 48  | 0.1384 | 0.0286 | 0.7  | 0.5 |
| GPX3 Glutathione peroxidase 3                               | IPI00026199 | 26 kDa  | 15  | 18  | 14  | 14  | 15  | 12  | 17  | 14  | 13  | 0.8289 | 0.2853 | 1.0  | 0.8 |
| GRB2 Isoform 1 of Growth factor receptor-bound protein 2    | IPI00021327 | 25 kDa  | 0   | 0   | 10  | 11  | 0   | 0   | 0   | 11  | 0   | 0.0005 | -      | 0.0  | -   |
| GRN Isoform 1 of Granulins                                  | IPI00296713 | 64 kDa  | 55  | 65  | 53  | 45  | 95  | 85  | 60  | 49  | 90  | 0.0230 | 0.0461 | 1.8  | 1.5 |
| GSN Isoform 2 of Gelsolin                                   | IPI00646773 | 81 kDa  | 119 | 124 | 152 | 162 | 126 | 109 | 122 | 157 | 117 | 0.0570 | 0.6606 | 0.7  | 1.0 |
| GSR Isoform Mitochondrial of Glutathione reductase, mito    | IPI00016862 | 56 kDa  | 2   | 0   | 0   | 0   | 0   | 0   | 1   | 0   | 0   | -      | 0.4226 | -    | 0.0 |
| GSS Glutathione synthetase                                  | IPI00010706 | 52 kDa  | 4   | 6   | 0   | 0   | 6   | 17  | 5   | 0   | 11  | 0.1584 | 0.3403 | -    | 2.3 |
| GSTA1 Glutathione S-transferase A1                          | IPI00657682 | 26 kDa  | 10  | 14  | 15  | 11  | 0   | 7   | 12  | 13  | 4   | 0.1488 | 0.1735 | 0.3  | 0.3 |
| GSTM2 Glutathione S-transferase Mu 2                        | IPI00219067 | 26 kDa  | 0   | 0   | 6   | 0   | 0   | 0   | 0   | 3   | 0   | 0.4226 | -      | 0.0  | -   |
| GSTM3 Glutathione S-transferase Mu 3                        | IPI00246975 | 27 kDa  | 8   | 6   | 7   | 10  | 0   | 0   | 7   | 8   | 0   | 0.0238 | 0.0255 | 0.0  | 0.0 |
| GSTO1 Glutathione S-transferase omega-1                     | IPI00019755 | 28 kDa  | 6   | 5   | 9   | 12  | 0   | 0   | 5   | 11  | 0   | 0.0188 | 0.0168 | 0.0  | 0.0 |
| GSTP1 Glutathione S-transferase P                           | IPI00219757 | 23 kDa  | 9   | 10  | 32  | 35  | 6   | 7   | 10  | 34  | 7   | 0.0032 | 0.0649 | 0.2  | 0.7 |
| GUCA2A Guanylin                                             | IPI00026926 | 12 kDa  | 25  | 31  | 20  | 26  | 30  | 31  | 28  | 23  | 30  | 0.1382 | 0.5428 | 1.3  | 1.1 |
| GUCA2B Guanylate cyclase activator 2B                       | IPI00003437 | 12 kDa  | 2   | 0   | 0   | 0   | 7   | 4   | 1   | 0   | 6   | 0.1067 | 0.1770 | -    | 5.5 |
| GUSB Isoform Long of Beta-glucuronidase                     | IPI00027745 | 75 kDa  | 17  | 22  | 0   | 3   | 46  | 44  | 19  | 1   | 45  | 0.0017 | 0.0110 | 33.0 | 2.3 |
| GYG1 Isoform GN-1L of Glycogenin-1                          | IPI00180386 | 39 kDa  | 0   | 0   | 16  | 19  | 0   | 0   | 0   | 18  | 0   | 0.0065 | -      | 0.0  | -   |
| H1FO Histone H1.0                                           | IPI00550239 | 21 kDa  | 0   | 0   | 0   | 3   | 0   | 0   | 0   | 1   | 0   | 0.4226 | -      | 0.0  | -   |
| HAVCR2 Isoform 2 of Hepatitis A virus cellular receptor 2   | IPI00383032 | 16 kDa  | 50  | 39  | 50  | 52  | 49  | 41  | 45  | 51  | 45  | 0.2558 | 0.9611 | 0.9  | 1.0 |
| HBA1;HBA2 Hemoglobin subunit alpha                          | IPI00410714 | 15 kDa  | 102 | 44  | 47  | 129 | 46  | 80  | 73  | 88  | 63  | 0.6274 | 0.8015 | 0.7  | 0.9 |
| HBB Hemoglobin subunit beta                                 | IPI00654755 | 16 kDa  | 165 | 93  | 101 | 218 | 131 | 164 | 129 | 159 | 147 | 0.8638 | 0.6895 | 0.9  | 1.1 |
| HEBP1 Heme-binding protein 1                                | IPI00148063 | 21 kDa  | 0   | 2   | 0   | 0   | 0   | 0   | 1   | 0   | 0   | -      | 0.4226 | -    | 0.0 |
| HEBP2 HEBP2 protein (Fragment)                              | IPI00644697 | 24 kDa  | 0   | 2   | 3   | 10  | 0   | 0   | 1   | 7   | 0   | 0.1650 | 0.4226 | 0.0  | 0.0 |
| HEG1 Isoform 1 of Protein HEG homolog 1                     | IPI00297263 | 147 kDa | 8   | 7   | 7   | 8   | 6   | 6   | 7   | 8   | 6   | 0.1415 | 0.1331 | 0.8  | 0.8 |
| HEXA cDNA FLJ53927, highly similar to Beta-hexosaminidase   | IPI00027851 | 62 kDa  | 16  | 16  | 7   | 5   | 53  | 46  | 16  | 6   | 50  | 0.0074 | 0.0118 | 8.0  | 3.1 |
| HEXB Beta-hexosaminidase subunit beta                       | IPI00012585 | 63 kDa  | 20  | 12  | 9   | 0   | 44  | 45  | 16  | 5   | 44  | 0.0137 | 0.0220 | 9.5  | 2.8 |
| HGFAC Hepatocyte growth factor activator                    | IPI00029193 | 71 kDa  | 15  | 14  | 19  | 11  | 7   | 6   | 14  | 15  | 7   | 0.1755 | 0.0155 | 0.5  | 0.5 |
| HIST1H1B Histone H1.5                                       | IPI00217468 | 23 kDa  | 6   | 9   | 15  | 14  | 9   | 13  | 8   | 14  | 11  | 0.2643 | 0.3499 | 0.8  | 1.4 |

|                                                                 |             |         |     |     |     |     |     |     |     |     |     |        |        |     |     |
|-----------------------------------------------------------------|-------------|---------|-----|-----|-----|-----|-----|-----|-----|-----|-----|--------|--------|-----|-----|
| HIST1H1D Histone H1.3                                           | IPI00217466 | 22 kDa  | 20  | 23  | 17  | 20  | 17  | 12  | 22  | 19  | 15  | 0.3114 | 0.1623 | 0.8 | 0.7 |
| HIST1H2AB;HIST1H2AE Histone H2A type 1-B/E                      | IPI00026272 | 14 kDa  | 11  | 14  | 7   | 10  | 19  | 18  | 12  | 8   | 18  | 0.0185 | 0.0601 | 2.2 | 1.5 |
| HIST1H2BL Histone H2B type 1-L                                  | IPI00018534 | 14 kDa  | 10  | 12  | 22  | 25  | 20  | 17  | 11  | 23  | 18  | 0.1383 | 0.0557 | 0.8 | 1.7 |
| HIST1H4A;HIST1H4F;HIST1H4C;HIST1H4I;HIST1H4L;HIST1H4M           | IPI00453473 | 11 kDa  | 46  | 44  | 44  | 65  | 65  | 67  | 45  | 55  | 66  | 0.4026 | 0.0068 | 1.2 | 1.5 |
| HIST2H3A;HIST2H3D;HIST2H3C Histone H3.2                         | IPI00171611 | 15 kDa  | 22  | 26  | 37  | 38  | 36  | 20  | 24  | 38  | 28  | 0.3569 | 0.6893 | 0.7 | 1.2 |
| HK3 Hexokinase-3                                                | IPI00005118 | 99 kDa  | 0   | 0   | 0   | 3   | 0   | 0   | 0   | 1   | 0   | 0.4226 | -      | 0.0 | -   |
| HMCN1 Hemicentin 1                                              | IPI00045512 | 614 kDa | 33  | 39  | 54  | 53  | 9   | 19  | 36  | 54  | 14  | 0.0162 | 0.0648 | 0.3 | 0.4 |
| HMGB1 High mobility group protein B1                            | IPI00419258 | 25 kDa  | 0   | 0   | 15  | 12  | 0   | 0   | 0   | 14  | 0   | 0.0103 | -      | 0.0 | -   |
| HMGB2 High mobility group protein B2                            | IPI00219097 | 24 kDa  | 0   | 0   | 17  | 18  | 0   | 0   | 0   | 18  | 0   | 0.0001 | -      | 0.0 | -   |
| HNRNPK Isoform 1 of Heterogeneous nuclear ribonucleoprotein K   | IPI00216049 | 51 kDa  | 0   | 0   | 2   | 0   | 0   | 0   | 0   | 1   | 0   | 0.4226 | -      | 0.0 | -   |
| HNT Neurotrimin variant 3                                       | IPI00442294 | 39 kDa  | 15  | 17  | 17  | 0   | 24  | 19  | 16  | 9   | 21  | 0.2967 | 0.1891 | 2.4 | 1.3 |
| HPD 4-hydroxyphenylpyruvate dioxygenase                         | IPI00218297 | 45 kDa  | 3   | 2   | 0   | 0   | 0   | 0   | 3   | 0   | 0   | -      | 0.0168 | -   | 0.0 |
| HPR 47 kDa protein                                              | IPI00641737 | 47 kDa  | 59  | 48  | 58  | 60  | 210 | 231 | 54  | 59  | 220 | 0.0040 | 0.0047 | 3.7 | 4.1 |
| HPX Hemopexin                                                   | IPI00022488 | 52 kDa  | 180 | 174 | 100 | 95  | 134 | 112 | 177 | 97  | 123 | 0.1475 | 0.0424 | 1.3 | 0.7 |
| HRG Histidine-rich glycoprotein                                 | IPI00022371 | 60 kDa  | 8   | 10  | 5   | 7   | 12  | 4   | 9   | 6   | 8   | 0.6688 | 0.8198 | 1.4 | 0.9 |
| HRNR Hornerin                                                   | IPI00398625 | 282 kDa | 4   | 16  | 24  | 12  | 12  | 0   | 10  | 18  | 6   | 0.2982 | 0.7013 | 0.3 | 0.6 |
| HRS12 Ribonuclease UK114                                        | IPI00005038 | 14 kDa  | 5   | 5   | 3   | 3   | 7   | 7   | 5   | 3   | 7   | 0.0099 | 0.0117 | 2.3 | 1.5 |
| HSP90AA1 heat shock protein 90kDa alpha (cytosolic), class A    | IPI00382470 | 98 kDa  | 0   | 3   | 3   | 0   | 0   | 0   | 2   | 2   | 0   | 0.4226 | 0.4226 | 0.0 | 0.0 |
| HSPA1B;HSPA1A Heat shock 70 kDa protein 1                       | IPI00304925 | 70 kDa  | 14  | 12  | 24  | 39  | 0   | 14  | 13  | 32  | 7   | 0.1395 | 0.5137 | 0.2 | 0.6 |
| HSPA5 HSPA5 protein                                             | IPI00003362 | 72 kDa  | 30  | 10  | 20  | 27  | 12  | 0   | 20  | 23  | 6   | 0.1413 | 0.3524 | 0.3 | 0.3 |
| HSPA8 Isoform 1 of Heat shock cognate 71 kDa protein            | IPI00003865 | 71 kDa  | 43  | 36  | 32  | 46  | 34  | 19  | 39  | 39  | 26  | 0.3237 | 0.2506 | 0.7 | 0.7 |
| HSPB1 Heat shock protein beta-1                                 | IPI00025512 | 23 kDa  | 19  | 13  | 58  | 90  | 4   | 0   | 16  | 74  | 2   | 0.0465 | 0.0627 | 0.0 | 0.1 |
| HSP110 10 kDa heat shock protein, mitochondrial                 | IPI00220362 | 11 kDa  | 0   | 0   | 0   | 7   | 0   | 0   | 0   | 3   | 0   | 0.4226 | -      | 0.0 | -   |
| HSPG2 Basement membrane-specific heparan sulfate proteoglycan 2 | IPI00024284 | 469 kDa | 388 | 374 | 387 | 368 | 184 | 202 | 381 | 377 | 193 | 0.0050 | 0.0036 | 0.5 | 0.5 |
| HYAL1 Isoform 2 of Hyaluronidase-1                              | IPI00168847 | 45 kDa  | 4   | 5   | 0   | 0   | 0   | 0   | 4   | 0   | 0   | -      | 0.0049 | -   | 0.0 |
| ICAM1 Intercellular adhesion molecule 1                         | IPI00008494 | 58 kDa  | 8   | 12  | 0   | 0   | 6   | 7   | 10  | 0   | 7   | 0.0043 | 0.2290 | -   | 0.7 |
| ICAM2 Intercellular adhesion molecule 2                         | IPI00009477 | 31 kDa  | 11  | 6   | 6   | 4   | 0   | 0   | 8   | 5   | 0   | 0.0285 | 0.0854 | 0.0 | 0.0 |
| ICOSLG Isoform 1 of ICOS ligand                                 | IPI00219131 | 33 kDa  | 23  | 25  | 32  | 45  | 17  | 15  | 24  | 39  | 16  | 0.0723 | 0.0377 | 0.4 | 0.7 |
| IDH1 Isocitrate dehydrogenase [NADP] cytoplasmic                | IPI00027223 | 47 kDa  | 11  | 6   | 0   | 4   | 0   | 0   | 8   | 2   | 0   | 0.4226 | 0.0854 | 0.0 | 0.0 |
| IFI30 Gamma-interferon-inducible lysosomal thiol reductase 1    | IPI00007853 | 29 kDa  | 12  | 10  | 14  | 14  | 10  | 20  | 11  | 14  | 15  | 0.8261 | 0.5329 | 1.1 | 1.3 |
| IFNAR2 Isoform 1 of Interferon-alpha/beta receptor beta chain   | IPI00010193 | 58 kDa  | 2   | 0   | 0   | 0   | 0   | 0   | 1   | 0   | 0   | -      | 0.4226 | -   | 0.0 |
| Ig heavy chain V-II region WAH                                  | IPI00382539 | 14 kDa  | 0   | 0   | 0   | 0   | 2   | 0   | 0   | 0   | 1   | 0.4226 | 0.4226 | -   | -   |
| Ig kappa chain V-I region DEE                                   | IPI00387025 | 12 kDa  | 11  | 0   | 6   | 0   | 0   | 12  | 6   | 3   | 6   | 0.6917 | 0.9641 | 2.0 | 1.1 |
| Ig kappa chain V-I region Ni                                    | IPI00387106 | 12 kDa  | 9   | 12  | 6   | 5   | 11  | 12  | 10  | 6   | 12  | 0.0037 | 0.4378 | 2.0 | 1.1 |
| Ig kappa chain V-I region OU                                    | IPI00387098 | 12 kDa  | 0   | 0   | 0   | 18  | 0   | 0   | 0   | 9   | 0   | 0.4226 | -      | 0.0 | -   |
| Ig kappa chain V-I region Roy                                   | IPI00387100 | 12 kDa  | 0   | 0   | 0   | 0   | 0   | 4   | 0   | 0   | 2   | 0.4226 | 0.4226 | -   | -   |
| Ig kappa chain V-III region #REF!                               | IPI00387113 | 12 kDa  | 9   | 10  | 0   | 0   | 0   | 0   | 10  | 0   | 0   | -      | 0.0049 | -   | 0.0 |
| Ig kappa chain V-III region #REF! (Fragment)                    | IPI00387116 | 11 kDa  | 21  | 20  | 0   | 0   | 20  | 0   | 20  | 0   | 10  | 0.4226 | 0.4088 | -   | 0.5 |
| Ig kappa chain V-III region CLL                                 | IPI00385253 | 14 kDa  | 0   | 0   | 8   | 0   | 20  | 0   | 0   | 4   | 10  | 0.6381 | 0.4226 | 2.5 | -   |
| Ig kappa chain V-III region IARC/#REF!                          | IPI00386131 | 14 kDa  | 0   | 0   | 0   | 0   | 0   | 4   | 0   | 0   | 2   | 0.4226 | 0.4226 | -   | -   |
| Ig kappa chain V-IV region JI                                   | IPI00386132 | 15 kDa  | 24  | 23  | 21  | 12  | 36  | 35  | 24  | 17  | 36  | 0.0466 | 0.0021 | 2.2 | 1.5 |
| IGF2R Cation-independent mannose-6-phosphate receptor 2         | IPI00289819 | 274 kDa | 83  | 69  | 12  | 19  | 47  | 37  | 76  | 15  | 42  | 0.0546 | 0.0598 | 2.7 | 0.6 |
| IGFBP2 Insulin-like growth factor-binding protein 2             | IPI00297284 | 35 kDa  | 18  | 22  | 39  | 50  | 12  | 18  | 20  | 45  | 15  | 0.0396 | 0.2771 | 0.3 | 0.8 |
| IGFBP3 Insulin-like growth factor-binding protein 3             | IPI00018305 | 32 kDa  | 5   | 6   | 7   | 10  | 5   | 0   | 5   | 8   | 2   | 0.1766 | 0.3693 | 0.3 | 0.5 |
| IGFBP6 Insulin-like growth factor-binding protein 6             | IPI00029235 | 25 kDa  | 0   | 0   | 3   | 0   | 0   | 0   | 0   | 2   | 0   | 0.4226 | -      | 0.0 | -   |
| IGFBP7 Insulin-like growth factor-binding protein 7             | IPI00016915 | 29 kDa  | 171 | 143 | 173 | 193 | 68  | 77  | 157 | 183 | 73  | 0.0102 | 0.0291 | 0.4 | 0.5 |
| IGHA1;IGHV3OR16-13 IGH1 protein                                 | IPI00166866 | 53 kDa  | 190 | 210 | 221 | 229 | 175 | 186 | 200 | 225 | 180 | 0.0200 | 0.2228 | 0.8 | 0.9 |

|                                                              |             |         |     |     |     |     |     |     |     |     |     |        |        |     |     |
|--------------------------------------------------------------|-------------|---------|-----|-----|-----|-----|-----|-----|-----|-----|-----|--------|--------|-----|-----|
| IGHG1 IGHG1 protein                                          | IPI00448925 | 60 kDa  | 356 | 358 | 469 | 456 | 463 | 469 | 357 | 463 | 466 | 0.6788 | 0.0010 | 1.0 | 1.3 |
| IGHG3 IGHG3 protein                                          | IPI00472345 | 57 kDa  | 0   | 0   | 370 | 349 | 315 | 344 | 0   | 360 | 329 | 0.2404 | 0.0020 | 0.9 | -   |
| IGHG4 IGHG4 protein                                          | IPI00550640 | 52 kDa  | 181 | 205 | 0   | 0   | 235 | 270 | 193 | 0   | 252 | 0.0046 | 0.1060 | -   | 1.3 |
| IGHM IGHM protein                                            | IPI00472610 | 53 kDa  | 424 | 415 | 537 | 520 | 515 | 531 | 419 | 529 | 523 | 0.6641 | 0.0078 | 1.0 | 1.2 |
| IGHM IGHM protein                                            | IPI00549291 | 66 kDa  | 79  | 98  | 117 | 121 | 93  | 95  | 88  | 119 | 94  | 0.0078 | 0.6223 | 0.8 | 1.1 |
| IGJ immunoglobulin J chain                                   | IPI00178926 | 18 kDa  | 21  | 24  | 20  | 20  | 10  | 18  | 23  | 20  | 14  | 0.2529 | 0.1728 | 0.7 | 0.6 |
| IGKC IGKC protein                                            | IPI00909649 | 26 kDa  | 585 | 555 | 0   | 0   | 831 | 902 | 570 | 0   | 866 | 0.0017 | 0.0165 | -   | 1.5 |
| IGKC IGKC protein                                            | IPI00845354 | 25 kDa  | 525 | 490 | 0   | 0   | 755 | 824 | 507 | 0   | 789 | 0.0019 | 0.0184 | -   | 1.6 |
| IGKV1-5 IGKV1-5 protein                                      | IPI00419424 | 26 kDa  | 581 | 549 | 332 | 400 | 825 | 903 | 565 | 366 | 864 | 0.0107 | 0.0195 | 2.4 | 1.5 |
| IGKV2-24 IGKV2-24 protein                                    | IPI00440577 | 26 kDa  | 578 | 540 | 337 | 410 | 817 | 889 | 559 | 373 | 853 | 0.0112 | 0.0185 | 2.3 | 1.5 |
| IGKV3-20 IGK@ protein                                        | IPI00889156 | 26 kDa  | 583 | 556 | 344 | 404 | 832 | 902 | 570 | 374 | 867 | 0.0087 | 0.0155 | 2.3 | 1.5 |
| IGKV3D-11 Similar to Ig kappa chain V-III region VG precurs  | IPI00784430 | 13 kDa  | 14  | 10  | 9   | 7   | 12  | 9   | 12  | 8   | 11  | 0.2704 | 0.6512 | 1.4 | 0.9 |
| IGL@ IGL@ protein                                            | IPI00829877 | 25 kDa  | 209 | 196 | 0   | 0   | 204 | 242 | 202 | 0   | 223 | 0.0073 | 0.4141 | -   | 1.1 |
| IGL@ IGL@ protein                                            | IPI00745660 | 25 kDa  | 185 | 180 | 126 | 124 | 160 | 193 | 182 | 125 | 177 | 0.0860 | 0.7571 | 1.4 | 1.0 |
| IGLV1-40 V1-13 protein (Fragment)                            | IPI00789259 | 10 kDa  | 0   | 0   | 2   | 0   | 4   | 0   | 0   | 1   | 2   | 0.7778 | 0.4226 | 1.6 | -   |
| IGLV1-44 Anti-streptococcal/anti-myosin immunoglobulin       | IPI00827522 | 12 kDa  | 17  | 9   | 8   | 22  | 20  | 20  | 13  | 15  | 20  | 0.5373 | 0.2188 | 1.3 | 1.5 |
| IGLV2-18 V1-5 protein                                        | IPI00553215 | 13 kDa  | 2   | 0   | 7   | 5   | 0   | 5   | 1   | 6   | 2   | 0.2623 | 0.6482 | 0.4 | 2.4 |
| IGLV3-27 V2-19 protein                                       | IPI00552852 | 12 kDa  | 6   | 0   | 0   | 0   | 0   | 0   | 3   | 0   | 0   | -      | 0.4226 | -   | 0.0 |
| IGSF8 Isoform 1 of Immunoglobulin superfamily member 8       | IPI00056478 | 65 kDa  | 40  | 40  | 25  | 34  | 37  | 27  | 40  | 30  | 32  | 0.7432 | 0.2588 | 1.1 | 0.8 |
| IL10RB Protein                                               | IPI00788962 | 34 kDa  | 8   | 6   | 3   | 0   | 0   | 0   | 7   | 2   | 0   | 0.4226 | 0.0255 | 0.0 | 0.0 |
| IL18BP interleukin 18 binding protein precursor              | IPI00220525 | 21 kDa  | 28  | 29  | 38  | 33  | 0   | 18  | 28  | 35  | 9   | 0.1035 | 0.1587 | 0.3 | 0.3 |
| IL1RN Isoform 1 of Interleukin-1 receptor antagonist protei  | IPI00000045 | 20 kDa  | 4   | 0   | 3   | 5   | 0   | 0   | 2   | 4   | 0   | 0.0456 | 0.4226 | 0.0 | 0.0 |
| IL2RA Interleukin-2 receptor alpha chain                     | IPI00003101 | 31 kDa  | 2   | 2   | 2   | 0   | 0   | 0   | 2   | 1   | 0   | 0.4226 | 0.0049 | 0.0 | 0.0 |
| IL6ST Isoform 1 of Interleukin-6 receptor subunit beta       | IPI00297124 | 104 kDa | 29  | 20  | 19  | 16  | 21  | 18  | 24  | 17  | 19  | 0.4265 | 0.4347 | 1.1 | 0.8 |
| Immunglobulin heavy chain variable region (Fragment)         | IPI00783287 | 13 kDa  | 65  | 77  | 68  | 76  | 0   | 0   | 71  | 72  | 0   | 0.0030 | 0.0073 | 0.0 | 0.0 |
| Immunoglobulin kappa, VJ region (Fragment)                   | IPI00827580 | 12 kDa  | 4   | 3   | 0   | 0   | 0   | 0   | 4   | 0   | 0   | -      | 0.0053 | -   | 0.0 |
| INHBC Inhibin beta C chain                                   | IPI00023314 | 38 kDa  | 2   | 2   | 0   | 0   | 0   | 0   | 2   | 0   | 0   | -      | 0.0049 | -   | 0.0 |
| IQGAP1 Ras GTPase-activating-like protein IQGAP1             | IPI00009342 | 189 kDa | 8   | 5   | 0   | 0   | 0   | 0   | 6   | 0   | 0   | -      | 0.0654 | -   | 0.0 |
| ISLR Immunoglobulin superfamily containing leucine-rich r    | IPI00023648 | 46 kDa  | 20  | 20  | 0   | 0   | 11  | 13  | 20  | 0   | 12  | 0.0055 | 0.0143 | -   | 0.6 |
| ITGA3 Isoform Alpha-3A of Integrin alpha-3                   | IPI00215995 | 117 kDa | 4   | 0   | 0   | 0   | 0   | 2   | 2   | 0   | 1   | 0.4226 | 0.7584 | -   | 0.6 |
| ITGAM Integrin alpha-M                                       | IPI00217987 | 127 kDa | 0   | 0   | 0   | 5   | 0   | 0   | 0   | 3   | 0   | 0.4226 | -      | 0.0 | -   |
| ITGAV Isoform 1 of Integrin alpha-V                          | IPI00027505 | 116 kDa | 5   | 0   | 0   | 0   | 0   | 0   | 3   | 0   | 0   | -      | 0.4226 | -   | 0.0 |
| ITGB1 Isoform Beta-1A of Integrin beta-1                     | IPI00217563 | 88 kDa  | 3   | 0   | 0   | 0   | 5   | 0   | 2   | 0   | 2   | 0.4226 | 0.7663 | -   | 1.7 |
| ITGB2 Integrin beta                                          | IPI00103356 | 78 kDa  | 0   | 0   | 2   | 0   | 0   | 0   | 0   | 1   | 0   | 0.4226 | -      | 0.0 | -   |
| ITIH1 Inter-alpha-trypsin inhibitor heavy chain H1           | IPI00292530 | 101 kDa | 13  | 7   | 0   | 0   | 0   | 0   | 10  | 0   | 0   | -      | 0.0821 | -   | 0.0 |
| ITIH2 Inter-alpha-trypsin inhibitor heavy chain H2           | IPI00305461 | 106 kDa | 20  | 16  | 0   | 0   | 0   | 0   | 18  | 0   | 0   | -      | 0.0113 | -   | 0.0 |
| ITIH3 Isoform 1 of Inter-alpha-trypsin inhibitor heavy chain | IPI00028413 | 100 kDa | 5   | 7   | 0   | 0   | 0   | 0   | 6   | 0   | 0   | -      | 0.0248 | -   | 0.0 |
| ITIH4 100 kDa protein                                        | IPI00896413 | 100 kDa | 188 | 252 | 174 | 143 | 111 | 115 | 220 | 158 | 113 | 0.0982 | 0.0792 | 0.7 | 0.5 |
| ITIH5 inter-alpha trypsin inhibitor heavy chain precursor 5  | IPI00328829 | 106 kDa | 6   | 3   | 0   | 0   | 0   | 0   | 5   | 0   | 0   | -      | 0.0654 | -   | 0.0 |
| IVL cDNA FLJ61407, highly similar to Involucrin              | IPI00011692 | 70 kDa  | 35  | 44  | 151 | 127 | 11  | 11  | 39  | 139 | 11  | 0.0086 | 0.0230 | 0.1 | 0.3 |
| JAG1 Protein jagged-1                                        | IPI00099650 | 134 kDa | 4   | 0   | 0   | 0   | 0   | 0   | 2   | 0   | 0   | -      | 0.4226 | -   | 0.0 |
| JUP Junction plakoglobin                                     | IPI00554711 | 82 kDa  | 7   | 2   | 0   | 0   | 19  | 0   | 5   | 0   | 9   | 0.4226 | 0.6749 | -   | 2.0 |
| KIAA0174 Isoform 1 of Uncharacterized protein KIAA0174       | IPI00024660 | 40 kDa  | 55  | 45  | 68  | 61  | 20  | 21  | 50  | 65  | 21  | 0.0065 | 0.0287 | 0.3 | 0.4 |
| KIAA1549 Isoform 1 of UPF0606 protein KIAA1549               | IPI00896475 | 203 kDa | 6   | 7   | 3   | 4   | 5   | 0   | 6   | 4   | 2   | 0.6575 | 0.2572 | 0.7 | 0.4 |
| KIF12 Kinesin-like protein KIF12                             | IPI00062047 | 71 kDa  | 2   | 2   | 0   | 0   | 0   | 0   | 2   | 0   | 0   | -      | 0.0049 | -   | 0.0 |
| KIRREL Isoform 1 of Kin of IRRE-like protein 1               | IPI00470360 | 84 kDa  | 4   | 0   | 0   | 0   | 4   | 0   | 2   | 0   | 2   | 0.4226 | 0.9653 | -   | 0.9 |
| KL Isoform 1 of Klotho                                       | IPI00295265 | 116 kDa | 0   | 0   | 9   | 0   | 0   | 0   | 0   | 5   | 0   | 0.4226 | -      | 0.0 | -   |



|                                                                      |             |         |     |     |      |     |     |     |     |     |     |        |        |     |     |
|----------------------------------------------------------------------|-------------|---------|-----|-----|------|-----|-----|-----|-----|-----|-----|--------|--------|-----|-----|
| KLK1 Kallikrein-1                                                    | IPI00304808 | 29 kDa  | 67  | 76  | 74   | 78  | 51  | 57  | 72  | 76  | 54  | 0.0227 | 0.0809 | 0.7 | 0.8 |
| KLK13 Kallikrein-13                                                  | IPI00007726 | 31 kDa  | 5   | 3   | 8    | 8   | 0   | 0   | 4   | 8   | 0   | 0.0000 | 0.0318 | 0.0 | 0.0 |
| KLK3 Prostate-specific antigen                                       | IPI00010858 | 29 kDa  | 49  | 38  | 0    | 0   | 0   | 0   | 44  | 0   | 0   | -      | 0.0156 | -   | 0.0 |
| KLK6 Isoform 1 of Kallikrein-6                                       | IPI00023845 | 27 kDa  | 0   | 0   | 2    | 3   | 0   | 0   | 0   | 3   | 0   | 0.0065 | -      | 0.0 | -   |
| KNG1 Isoform LMW of Kininogen-1                                      | IPI00215894 | 48 kDa  | 742 | 744 | 882  | 976 | 468 | 493 | 743 | 929 | 480 | 0.0116 | 0.0023 | 0.5 | 0.6 |
| KPRP Keratinocyte proline-rich protein                               | IPI00514908 | 64 kDa  | 6   | 12  | 7    | 8   | 10  | 0   | 9   | 8   | 5   | 0.6575 | 0.5743 | 0.7 | 0.6 |
| KRT1 Keratin, type II cytoskeletal 1                                 | IPI00220327 | 66 kDa  | 648 | 623 | 1032 | 863 | 632 | 521 | 636 | 947 | 577 | 0.0664 | 0.4066 | 0.6 | 0.9 |
| KRT10 Keratin, type I cytoskeletal 10                                | IPI00009865 | 60 kDa  | 502 | 488 | 842  | 782 | 479 | 423 | 495 | 812 | 451 | 0.0126 | 0.2627 | 0.6 | 0.9 |
| KRT13 Isoform 1 of Keratin, type I cytoskeletal 13                   | IPI00009866 | 50 kDa  | 34  | 0   | 159  | 165 | 40  | 27  | 17  | 162 | 33  | 0.0030 | 0.4590 | 0.2 | 2.0 |
| KRT14 Keratin, type I cytoskeletal 14                                | IPI00384444 | 52 kDa  | 167 | 180 | 318  | 246 | 192 | 150 | 173 | 282 | 171 | 0.1149 | 0.9180 | 0.6 | 1.0 |
| KRT18 Keratin, type I cytoskeletal 18                                | IPI00554788 | 48 kDa  | 0   | 0   | 78   | 68  | 0   | 0   | 0   | 73  | 0   | 0.0042 | -      | 0.0 | -   |
| KRT2 Keratin, type II cytoskeletal 2 epidermal                       | IPI00021304 | 66 kDa  | 389 | 357 | 559  | 424 | 341 | 290 | 373 | 491 | 315 | 0.1357 | 0.1950 | 0.6 | 0.8 |
| KRT27 Keratin, type I cytoskeletal 27                                | IPI00328103 | 50 kDa  | 57  | 68  | 81   | 63  | 65  | 0   | 62  | 72  | 32  | 0.3609 | 0.4551 | 0.5 | 0.5 |
| KRT34 keratin 34                                                     | IPI00292715 | 49 kDa  | 0   | 0   | 0    | 0   | 0   | 31  | 0   | 0   | 15  | 0.4226 | 0.4226 | -   | -   |
| KRT5 Keratin, type II cytoskeletal 5                                 | IPI00009867 | 62 kDa  | 163 | 145 | 292  | 233 | 172 | 139 | 154 | 262 | 156 | 0.0862 | 0.9427 | 0.6 | 1.0 |
| KRT6A Keratin, type II cytoskeletal 6A                               | IPI00300725 | 60 kDa  | 139 | 131 | 298  | 238 | 157 | 136 | 135 | 268 | 146 | 0.0606 | 0.4193 | 0.5 | 1.1 |
| KRT78 Isoform 2 of Keratin, type II cytoskeletal 78                  | IPI00166205 | 57 kDa  | 0   | 0   | 0    | 0   | 7   | 0   | 0   | 0   | 4   | 0.4226 | 0.4226 | -   | -   |
| KRT8 Keratin, type II cytoskeletal 8                                 | IPI00554648 | 54 kDa  | 0   | 0   | 139  | 127 | 0   | 0   | 0   | 133 | 0   | 0.0021 | -      | 0.0 | -   |
| KRT9 Keratin, type I cytoskeletal 9                                  | IPI00019359 | 62 kDa  | 299 | 270 | 467  | 261 | 358 | 207 | 284 | 364 | 283 | 0.5880 | 0.9840 | 0.8 | 1.0 |
| KRTAP13-2 Keratin-associated protein 13-2                            | IPI00373959 | 19 kDa  | 0   | 0   | 0    | 0   | 0   | 5   | 0   | 0   | 2   | 0.4226 | 0.4226 | -   | -   |
| KRTAP13-4 Keratin-associated protein 13-4                            | IPI00373947 | 18 kDa  | 0   | 0   | 0    | 0   | 0   | 4   | 0   | 0   | 2   | 0.4226 | 0.4226 | -   | -   |
| L1CAM Isoform 1 of Neural cell adhesion molecule L1                  | IPI00027087 | 140 kDa | 28  | 31  | 24   | 29  | 4   | 4   | 30  | 26  | 4   | 0.0087 | 0.0036 | 0.1 | 0.1 |
| LAIR1 Isoform 2 of Leukocyte-associated immunoglobulin-1             | IPI00028015 | 30 kDa  | 61  | 56  | 57   | 64  | 42  | 53  | 59  | 60  | 48  | 0.1940 | 0.2043 | 0.8 | 0.8 |
| LAMA5 Laminin subunit alpha-5                                        | IPI00783665 | 400 kDa | 7   | 12  | 15   | 15  | 0   | 0   | 9   | 15  | 0   | 0.0000 | 0.0547 | 0.0 | 0.0 |
| LAMB1 Laminin subunit beta-1                                         | IPI00013976 | 198 kDa | 0   | 0   | 0    | 0   | 4   | 0   | 0   | 0   | 2   | 0.4226 | 0.4226 | -   | -   |
| Lambda-chain                                                         | IPI00827875 | 25 kDa  | 233 | 211 | 167  | 180 | 230 | 233 | 222 | 173 | 231 | 0.0128 | 0.4820 | 1.3 | 1.0 |
| LAMC1 Laminin subunit gamma-1                                        | IPI00298281 | 178 kDa | 17  | 8   | 6    | 4   | 4   | 0   | 13  | 5   | 2   | 0.2729 | 0.1585 | 0.4 | 0.1 |
| LAMP1 Lysosome-associated membrane glycoprotein 1                    | IPI00884105 | 45 kDa  | 18  | 24  | 22   | 29  | 40  | 41  | 21  | 25  | 41  | 0.0459 | 0.0258 | 1.6 | 1.9 |
| LAMP2 Isoform LAMP-2A of Lysosome-associated membrane glycoprotein 2 | IPI00009030 | 45 kDa  | 42  | 43  | 46   | 54  | 61  | 52  | 42  | 50  | 56  | 0.4202 | 0.0870 | 1.1 | 1.3 |
| LAYN Isoform 2 of Layilin                                            | IPI00744423 | 42 kDa  | 5   | 3   | 0    | 0   | 0   | 5   | 4   | 0   | 2   | 0.4226 | 0.5318 | -   | 0.6 |
| LBP Lipopolysaccharide-binding protein                               | IPI00032311 | 53 kDa  | 5   | 7   | 0    | 0   | 0   | 0   | 6   | 0   | 0   | -      | 0.0248 | -   | 0.0 |
| LCAT Phosphatidylcholine-sterol acyltransferase                      | IPI00022331 | 50 kDa  | 8   | 6   | 7    | 7   | 5   | 6   | 7   | 7   | 5   | 0.0936 | 0.3582 | 0.8 | 0.8 |
| LCN1 Lipocalin-1                                                     | IPI00009650 | 19 kDa  | 9   | 7   | 0    | 0   | 7   | 12  | 8   | 0   | 10  | 0.0475 | 0.5576 | -   | 1.2 |
| LCN2 Neutrophil gelatinase-associated lipocalin                      | IPI00299547 | 23 kDa  | 19  | 23  | 115  | 106 | 37  | 38  | 21  | 110 | 38  | 0.0033 | 0.0148 | 0.3 | 1.8 |
| LCP1 Plastin-2                                                       | IPI00010471 | 70 kDa  | 0   | 0   | 68   | 50  | 0   | 4   | 0   | 59  | 2   | 0.0243 | 0.4226 | 0.0 | -   |
| LDHA Isoform 1 of L-lactate dehydrogenase A chain                    | IPI00217966 | 37 kDa  | 20  | 15  | 41   | 46  | 0   | 15  | 17  | 43  | 8   | 0.0490 | 0.3491 | 0.2 | 0.4 |
| LDHB L-lactate dehydrogenase B chain                                 | IPI00219217 | 37 kDa  | 42  | 36  | 43   | 34  | 14  | 20  | 39  | 38  | 17  | 0.0582 | 0.0394 | 0.4 | 0.4 |
| LEAP2 Liver-expressed antimicrobial peptide 2                        | IPI00056309 | 9 kDa   | 15  | 15  | 9    | 10  | 9   | 8   | 15  | 9   | 8   | 0.0705 | 0.0011 | 0.9 | 0.6 |
| LGALS3 Galectin-3                                                    | IPI00465431 | 26 kDa  | 12  | 3   | 14   | 7   | 0   | 0   | 8   | 10  | 0   | 0.0999 | 0.2122 | 0.0 | 0.0 |
| LGALS3BP Galectin-3-binding protein                                  | IPI00023673 | 65 kDa  | 227 | 242 | 320  | 351 | 275 | 291 | 234 | 335 | 283 | 0.0978 | 0.0473 | 0.8 | 1.2 |
| LGALS9 Isoform Long of Galectin-9                                    | IPI00010477 | 40 kDa  | 13  | 13  | 6    | 0   | 6   | 7   | 13  | 3   | 7   | 0.3275 | 0.0057 | 2.3 | 0.5 |
| LHB Lutropin subunit beta                                            | IPI00000854 | 15 kDa  | 5   | 0   | 0    | 3   | 0   | 0   | 3   | 1   | 0   | 0.4226 | 0.4226 | 0.0 | 0.0 |
| LIFR Leukemia inhibitory factor receptor                             | IPI00444272 | 124 kDa | 4   | 3   | 0    | 0   | 0   | 0   | 4   | 0   | 0   | -      | 0.0053 | -   | 0.0 |
| LILRA5 Isoform 1 of Leukocyte immunoglobulin-like receptor 5         | IPI00158145 | 33 kDa  | 7   | 0   | 0    | 0   | 0   | 0   | 4   | 0   | 0   | -      | 0.4226 | -   | 0.0 |
| LMAN2 Vesicular integral-membrane protein VIP36                      | IPI00009950 | 40 kDa  | 132 | 144 | 101  | 103 | 87  | 87  | 138 | 102 | 87  | 0.0088 | 0.0137 | 0.9 | 0.6 |
| LMNA Isoform A of Lamin-A/C                                          | IPI00021405 | 74 kDa  | 0   | 0   | 0    | 8   | 0   | 0   | 0   | 4   | 0   | 0.4226 | -      | 0.0 | -   |
| LNPEP Isoform 2 of Leucyl-cystinyl aminopeptidase                    | IPI00221240 | 116 kDa | 3   | 5   | 0    | 0   | 0   | 0   | 4   | 0   | 0   | -      | 0.0419 | -   | 0.0 |

|                                                            |             |         |      |      |     |     |      |      |      |     |      |        |        |      |     |
|------------------------------------------------------------|-------------|---------|------|------|-----|-----|------|------|------|-----|------|--------|--------|------|-----|
| LOC100126583 cDNA FLJ41981 fis, clone SMINT2011888, h      | IPI00784830 | 53 kDa  | 128  | 147  | 169 | 170 | 131  | 134  | 138  | 170 | 132  | 0.0018 | 0.6244 | 0.8  | 1.0 |
| LOC100132802;KRTAP3-1 Keratin-associated protein 3-1       | IPI00011212 | 11 kDa  | 0    | 0    | 0   | 0   | 0    | 2    | 0    | 0   | 1    | 0.4226 | 0.4226 | -    | -   |
| LOC100133739 Putative uncharacterized protein DKFZp68      | IPI00426051 | 51 kDa  | 302  | 309  | 413 | 400 | 399  | 414  | 305  | 407 | 406  | 0.9742 | 0.0062 | 1.0  | 1.3 |
| LOC124220 Uncharacterized protein UNQ773/PRO1567           | IPI00060800 | 23 kDa  | 39   | 37   | 60  | 65  | 6    | 5    | 38   | 63  | 5    | 0.0022 | 0.0016 | 0.1  | 0.1 |
| LOC284422 Transmembrane protein HSPC323                    | IPI00024925 | 15 kDa  | 3    | 3    | 0   | 0   | 0    | 0    | 3    | 0   | 0    | -      | 0.0049 | -    | 0.0 |
| LOC388344 similar to RPL13 protein                         | IPI00397611 | 24 kDa  | 2    | 0    | 0   | 0   | 0    | 0    | 1    | 0   | 0    | -      | 0.4226 | -    | 0.0 |
| LOC642103 similar to hCG1811191                            | IPI00741768 | 170 kDa | 311  | 260  | 69  | 76  | 337  | 317  | 286  | 73  | 327  | 0.0018 | 0.2696 | 4.5  | 1.1 |
| LOC642131 similar to hCG1812074                            | IPI00887332 | 51 kDa  | 0    | 0    | 0   | 0   | 10   | 0    | 0    | 0   | 5    | 0.4226 | 0.4226 | -    | -   |
| LOC652113 Immunglobulin heavy chain variable region (Fr    | IPI00745363 | 14 kDa  | 8    | 0    | 0   | 0   | 0    | 24   | 4    | 0   | 12   | 0.4226 | 0.5948 | -    | 3.0 |
| LOC728285;LOC730755;KRTAP2-4;KAP2.1B;LOC644350;LO          | IPI00013265 | 13 kDa  | 0    | 0    | 0   | 0   | 0    | 5    | 0    | 0   | 2    | 0.4226 | 0.4226 | -    | -   |
| LPA Apolipoprotein(a)                                      | IPI00029168 | 501 kDa | 62   | 65   | 47  | 41  | 27   | 25   | 63   | 44  | 26   | 0.0364 | 0.0023 | 0.6  | 0.4 |
| LPHN1 Isoform 1 of Latrophilin-1                           | IPI00183445 | 163 kDa | 5    | 0    | 0   | 0   | 0    | 0    | 3    | 0   | 0    | -      | 0.4226 | -    | 0.0 |
| LRG1 Leucine-rich alpha-2-glycoprotein                     | IPI00022417 | 38 kDa  | 149  | 139  | 31  | 34  | 214  | 223  | 144  | 33  | 219  | 0.0007 | 0.0081 | 6.7  | 1.5 |
| LRP1 Prolow-density lipoprotein receptor-related protein 1 | IPI00020557 | 505 kDa | 7    | 0    | 13  | 16  | 0    | 0    | 4    | 15  | 0    | 0.0150 | 0.4226 | 0.0  | 0.0 |
| LRP10 Isoform 1 of Low-density lipoprotein receptor-relate | IPI00414231 | 76 kDa  | 6    | 7    | 0   | 0   | 0    | 0    | 6    | 0   | 0    | -      | 0.0049 | -    | 0.0 |
| LRP2 Low-density lipoprotein receptor-related protein 2    | IPI00024292 | 522 kDa | 1196 | 1076 | 543 | 485 | 1165 | 1006 | 1136 | 514 | 1086 | 0.0213 | 0.6645 | 2.1  | 1.0 |
| LRRC15 Leucine-rich repeat-containing protein 15           | IPI00152871 | 64 kDa  | 5    | 6    | 0   | 0   | 2    | 4    | 5    | 0   | 3    | 0.0294 | 0.0683 | -    | 0.6 |
| LRRN4 Leucine-rich repeat neuronal protein 4               | IPI00216345 | 79 kDa  | 5    | 0    | 0   | 0   | 0    | 0    | 3    | 0   | 0    | -      | 0.4226 | -    | 0.0 |
| LTBP1 latent transforming growth factor beta binding prot  | IPI00302679 | 153 kDa | 0    | 6    | 0   | 0   | 5    | 0    | 3    | 0   | 2    | 0.4226 | 0.9273 | -    | 0.9 |
| LTBP2 Latent-transforming growth factor beta-binding pro   | IPI00292150 | 195 kDa | 55   | 44   | 68  | 63  | 27   | 28   | 49   | 65  | 28   | 0.0058 | 0.0623 | 0.4  | 0.6 |
| LTBP4 Isoform 2 of Latent-transforming growth factor beta  | IPI00783492 | 166 kDa | 10   | 8    | 9   | 10  | 0    | 9    | 9    | 9   | 5    | 0.4277 | 0.4667 | 0.5  | 0.5 |
| LUM Lumican                                                | IPI00020986 | 38 kDa  | 36   | 36   | 12  | 18  | 31   | 39   | 36   | 15  | 35   | 0.0552 | 0.8581 | 2.4  | 1.0 |
| LY6D Lymphocyte antigen 6D                                 | IPI00029510 | 13 kDa  | 4    | 0    | 0   | 0   | 11   | 15   | 2    | 0   | 13   | 0.0238 | 0.0598 | -    | 6.6 |
| LY6H Lymphocyte antigen 6 complex, locus H isoform b       | IPI00014964 | 17 kDa  | 7    | 7    | 6   | 4   | 17   | 19   | 7    | 5   | 18   | 0.0073 | 0.0045 | 3.7  | 2.6 |
| LYNX1 Ly-6 neurotoxin-like protein 1 isoform a             | IPI00218851 | 14 kDa  | 20   | 13   | 19  | 18  | 11   | 15   | 16   | 18  | 13   | 0.1510 | 0.5441 | 0.7  | 0.8 |
| LYPD3 Ly6/PLAUR domain-containing protein 3                | IPI00004310 | 36 kDa  | 0    | 0    | 29  | 18  | 0    | 0    | 23   | 0   | 0    | 0.0535 | -      | 0.0  | -   |
| LYPLA1 cDNA FLJ60607, highly similar to Acyl-protein thioe | IPI00007321 | 28 kDa  | 0    | 2    | 0   | 0   | 0    | 0    | 1    | 0   | 0    | -      | 0.4226 | -    | 0.0 |
| LYVE1 Lymphatic vessel endothelial hyaluronic acid recept  | IPI00290856 | 35 kDa  | 39   | 47   | 12  | 7   | 167  | 144  | 43   | 9   | 155  | 0.0061 | 0.0111 | 16.9 | 3.6 |
| LYZ Lysozyme C                                             | IPI00019038 | 17 kDa  | 17   | 15   | 46  | 45  | 12   | 9    | 16   | 46  | 11   | 0.0022 | 0.1075 | 0.2  | 0.7 |
| MADCAM1 Isoform 1 of Mucosal addressin cell adhesion n     | IPI00289931 | 40 kDa  | 20   | 18   | 16  | 8   | 15   | 8    | 19   | 12  | 12   | 0.9203 | 0.1556 | 1.0  | 0.6 |
| MAN1A1 Mannosidase, alpha, class 1A, member 1, isoform     | IPI00439446 | 75 kDa  | 15   | 21   | 25  | 18  | 5    | 0    | 18   | 22  | 2    | 0.0537 | 0.0559 | 0.1  | 0.1 |
| MAN2A1 Alpha-mannosidase 2                                 | IPI00003802 | 131 kDa | 13   | 14   | 0   | 0   | 0    | 0    | 13   | 0   | 0    | -      | 0.0009 | -    | 0.0 |
| MAN2B1 Lysosomal alpha-mannosidase                         | IPI00012989 | 114 kDa | 0    | 0    | 0   | 0   | 5    | 4    | 0    | 0   | 4    | 0.0270 | 0.0270 | -    | -   |
| MAN2B2 Isoform 1 of Epididymis-specific alpha-mannosid:    | IPI00328488 | 114 kDa | 17   | 9    | 3   | 0   | 30   | 30   | 13   | 2   | 30   | 0.0039 | 0.0509 | 17.1 | 2.3 |
| MANBA Beta-mannosidase                                     | IPI00298793 | 101 kDa | 43   | 51   | 19  | 20  | 51   | 46   | 47   | 19  | 49   | 0.0080 | 0.7440 | 2.5  | 1.0 |
| MAPK1 Mitogen-activated protein kinase 1                   | IPI00003479 | 41 kDa  | 0    | 0    | 2   | 0   | 0    | 0    | 0    | 1   | 0    | 0.4226 | -      | 0.0  | -   |
| MAPRE1 Microtubule-associated protein RP/EB family mer     | IPI00017596 | 30 kDa  | 0    | 0    | 5   | 0   | 0    | 0    | 0    | 2   | 0    | 0.4226 | -      | 0.0  | -   |
| MARCKS Myristoylated alanine-rich C-kinase substrate       | IPI00219301 | 32 kDa  | 0    | 0    | 2   | 0   | 0    | 0    | 0    | 1   | 0    | 0.4226 | -      | 0.0  | -   |
| MASP2 Isoform 1 of Mannan-binding lectin serine protease   | IPI00294713 | 76 kDa  | 120  | 146  | 63  | 49  | 58   | 56   | 133  | 56  | 57   | 0.8744 | 0.0289 | 1.0  | 0.4 |
| MATN4 matrilin 4 isoform 3 precursor                       | IPI00012325 | 55 kDa  | 0    | 3    | 0   | 0   | 0    | 0    | 2    | 0   | 0    | -      | 0.4226 | -    | 0.0 |
| MCAM Isoform 1 of Cell surface glycoprotein MUC18          | IPI00016334 | 72 kDa  | 25   | 23   | 16  | 0   | 12   | 14   | 24   | 8   | 13   | 0.5884 | 0.0147 | 1.6  | 0.6 |
| MDH1 Malate dehydrogenase, cytoplasmic                     | IPI00291005 | 36 kDa  | 4    | 7    | 5   | 8   | 0    | 0    | 5    | 6   | 0    | 0.0687 | 0.0644 | 0.0  | 0.0 |
| MDH2 Malate dehydrogenase, mitochondrial                   | IPI00291006 | 36 kDa  | 6    | 0    | 2   | 0   | 0    | 0    | 3    | 1   | 0    | 0.4226 | 0.4226 | 0.0  | 0.0 |
| MEGF8 Isoform 1 of Multiple epidermal growth factor-like   | IPI00027310 | 303 kDa | 56   | 28   | 7   | 10  | 27   | 24   | 42   | 8   | 26   | 0.0168 | 0.3719 | 3.1  | 0.6 |
| MEGF9 Multiple epidermal growth factor-like domains 9      | IPI00401283 | 63 kDa  | 6    | 9    | 0   | 4   | 4    | 4    | 8    | 2   | 4    | 0.5168 | 0.1326 | 1.8  | 0.5 |
| MFAP4 Microfibril-associated glycoprotein 4                | IPI00022792 | 29 kDa  | 0    | 0    | 3   | 0   | 0    | 0    | 0    | 2   | 0    | 0.4226 | -      | 0.0  | -   |
| MF12 Isoform 1 of Melanotransferrin                        | IPI00029275 | 80 kDa  | 22   | 13   | 22  | 26  | 9    | 0    | 17   | 24  | 4    | 0.0544 | 0.1788 | 0.2  | 0.3 |

|                                                                 |             |         |     |     |     |     |     |     |     |     |     |        |        |      |     |
|-----------------------------------------------------------------|-------------|---------|-----|-----|-----|-----|-----|-----|-----|-----|-----|--------|--------|------|-----|
| MGAM Maltase-glucoamylase, intestinal                           | IPI00220143 | 210 kDa | 405 | 334 | 79  | 83  | 435 | 397 | 370 | 81  | 416 | 0.0033 | 0.3657 | 5.1  | 1.1 |
| MIA3 Isoform 1 of Melanoma inhibitory activity protein 3        | IPI00455473 | 214 kDa | 0   | 3   | 0   | 0   | 0   | 0   | 2   | 0   | 0   | -      | 0.4226 | -    | 0.0 |
| MIIF;LOC284889 Macrophage migration inhibitory factor           | IPI00293276 | 12 kDa  | 3   | 3   | 0   | 0   | 4   | 4   | 3   | 0   | 4   | 0.0006 | 0.2366 | -    | 1.1 |
| MME Neprilysin                                                  | IPI00247063 | 86 kDa  | 77  | 68  | 17  | 7   | 7   | 6   | 72  | 12  | 7   | 0.4179 | 0.0048 | 0.6  | 0.1 |
| MMP7 Matrilysin                                                 | IPI00013400 | 30 kDa  | 9   | 9   | 2   | 5   | 0   | 0   | 9   | 4   | 0   | 0.1314 | 0.0001 | 0.0  | 0.0 |
| MMP8 Neutrophil collagenase                                     | IPI00027846 | 53 kDa  | 0   | 0   | 2   | 0   | 0   | 0   | 0   | 1   | 0   | 0.4226 | -      | 0.0  | -   |
| MMP9 Matrix metalloproteinase-9                                 | IPI00027509 | 78 kDa  | 0   | 0   | 79  | 67  | 5   | 4   | 0   | 73  | 4   | 0.0077 | 0.0270 | 0.1  | -   |
| MMRN1 Multimerin-1                                              | IPI00012269 | 138 kDa | 0   | 0   | 0   | 0   | 0   | 6   | 0   | 0   | 3   | 0.4226 | 0.4226 | -    | -   |
| MMRN2 Multimerin-2                                              | IPI00015525 | 104 kDa | 14  | 14  | 15  | 22  | 9   | 2   | 14  | 18  | 6   | 0.1084 | 0.1185 | 0.3  | 0.4 |
| MNDA Myeloid cell nuclear differentiation antigen               | IPI00013163 | 46 kDa  | 0   | 0   | 10  | 8   | 0   | 0   | 0   | 9   | 0   | 0.0143 | -      | 0.0  | -   |
| MOC52 Molybdenum cofactor synthesis protein 2 small subunit     | IPI00002968 | 10 kDa  | 7   | 7   | 2   | 0   | 2   | 4   | 7   | 1   | 3   | 0.2816 | 0.0177 | 2.6  | 0.4 |
| MPO Isoform H17 of Myeloperoxidase                              | IPI00007244 | 84 kDa  | 0   | 0   | 292 | 255 | 6   | 0   | 0   | 273 | 3   | 0.0048 | 0.4226 | 0.0  | -   |
| MPST 3-mercaptopyruvate sulfurtransferase                       | IPI00165360 | 33 kDa  | 4   | 0   | 0   | 0   | 0   | 0   | 2   | 0   | 0   | -      | 0.4226 | -    | 0.0 |
| MPZL1 Isoform 1 of Myelin protein zero-like protein 1           | IPI00022558 | 29 kDa  | 2   | 0   | 0   | 0   | 0   | 4   | 1   | 0   | 2   | 0.4226 | 0.7406 | -    | 1.8 |
| MRCL3 Myosin regulatory light chain MRCL3 variant               | IPI00604523 | 20 kDa  | 0   | 0   | 10  | 12  | 0   | 0   | 11  | 0   | 0   | 0.0065 | -      | 0.0  | -   |
| MSLN Isoform 2 of Mesothelin                                    | IPI00025110 | 68 kDa  | 10  | 13  | 0   | 0   | 2   | 5   | 11  | 0   | 4   | 0.0844 | 0.0473 | -    | 0.3 |
| MSMB Isoform PSP94 of Beta-microseminoprotein                   | IPI00414609 | 13 kDa  | 2   | 0   | 0   | 0   | 0   | 0   | 1   | 0   | 0   | -      | 0.4226 | -    | 0.0 |
| MSN Moesin                                                      | IPI00219365 | 68 kDa  | 64  | 54  | 117 | 90  | 46  | 39  | 59  | 103 | 43  | 0.0488 | 0.1116 | 0.4  | 0.7 |
| MST1 macrophage stimulating 1                                   | IPI00292218 | 82 kDa  | 0   | 2   | 0   | 0   | 0   | 0   | 1   | 0   | 0   | -      | 0.4226 | -    | 0.0 |
| MUC1 Isoform 1 of Mucin-1                                       | IPI00013955 | 122 kDa | 53  | 58  | 59  | 71  | 46  | 45  | 55  | 65  | 45  | 0.0811 | 0.0532 | 0.7  | 0.8 |
| MUC20 Isoform 1 of Mucin-20                                     | IPI00885179 | 72 kDa  | 23  | 28  | 35  | 31  | 17  | 13  | 25  | 33  | 15  | 0.0236 | 0.0873 | 0.5  | 0.6 |
| MUC5B mucin 5, subtype B, tracheobronchial                      | IPI00855918 | 597 kDa | 3   | 0   | 7   | 5   | 0   | 0   | 2   | 6   | 0   | 0.0143 | 0.4226 | 0.0  | 0.0 |
| MUC6 mucin 6, gastric                                           | IPI00401776 | 257 kDa | 27  | 26  | 7   | 15  | 4   | 0   | 27  | 11  | 2   | 0.1763 | 0.0057 | 0.2  | 0.1 |
| MUPCDH Isoform 3 of Mucin and cadherin-like protein             | IPI00180687 | 53 kDa  | 10  | 10  | 0   | 0   | 0   | 7   | 10  | 0   | 4   | 0.4226 | 0.2026 | -    | 0.3 |
| MXRA5 Matrix-remodeling-associated protein 5                    | IPI00012347 | 312 kDa | 0   | 2   | 0   | 0   | 0   | 0   | 1   | 0   | 0   | -      | 0.4226 | -    | 0.0 |
| MXRA8 Isoform 2 of Matrix-remodeling-associated protein         | IPI00153049 | 50 kDa  | 52  | 52  | 90  | 106 | 16  | 18  | 52  | 98  | 17  | 0.0095 | 0.0005 | 0.2  | 0.3 |
| MYH9 Isoform 1 of Myosin-9                                      | IPI00019502 | 227 kDa | 13  | 6   | 146 | 124 | 0   | 0   | 9   | 135 | 0   | 0.0066 | 0.1222 | 0.0  | 0.0 |
| MYL6B;MYL6 Isoform Non-muscle of Myosin light polypeptide chain | IPI00335168 | 17 kDa  | 3   | 3   | 12  | 22  | 5   | 5   | 3   | 17  | 5   | 0.1465 | 0.0245 | 0.3  | 1.5 |
| MYLK Isoform 2 of Myosin light chain kinase, smooth muscle      | IPI00221255 | 203 kDa | 0   | 5   | 3   | 4   | 0   | 6   | 2   | 4   | 3   | 0.8076 | 0.8780 | 0.8  | 1.3 |
| MYO1C myosin IC isoform a                                       | IPI00743335 | 122 kDa | 15  | 7   | 7   | 0   | 10  | 8   | 11  | 3   | 9   | 0.2552 | 0.6990 | 2.6  | 0.8 |
| MYO1D Isoform 1 of Myosin-I d                                   | IPI00329719 | 116 kDa | 4   | 3   | 0   | 0   | 0   | 0   | 4   | 0   | 0   | -      | 0.0053 | -    | 0.0 |
| Myosin-reactive immunoglobulin light chain variable region      | IPI00829980 | 12 kDa  | 0   | 8   | 0   | 0   | 0   | 4   | 4   | 0   | 2   | 0.4226 | 0.6591 | -    | 0.4 |
| NAGA Alpha-N-acetylgalactosaminidase                            | IPI00414909 | 47 kDa  | 14  | 12  | 0   | 0   | 36  | 32  | 13  | 0   | 34  | 0.0037 | 0.0127 | -    | 2.7 |
| NAGLU Alpha-N-acetylglucosaminidase                             | IPI00008787 | 82 kDa  | 60  | 78  | 17  | 23  | 70  | 65  | 69  | 20  | 67  | 0.0061 | 0.8642 | 3.3  | 1.0 |
| NAPSA Napsin-A                                                  | IPI00014055 | 45 kDa  | 14  | 10  | 6   | 4   | 9   | 14  | 12  | 5   | 11  | 0.1514 | 0.8432 | 2.3  | 0.9 |
| NCAM1 Isoform 2 of Neural cell adhesion molecule 1              | IPI00435020 | 93 kDa  | 16  | 14  | 10  | 11  | 40  | 20  | 15  | 11  | 30  | 0.1894 | 0.2685 | 2.8  | 2.0 |
| NCCRP1 FBA domain-containing protein LOC342897                  | IPI00247167 | 31 kDa  | 0   | 0   | 6   | 15  | 0   | 0   | 0   | 10  | 0   | 0.1523 | -      | 0.0  | -   |
| NEGR1 Neuronal growth regulator 1                               | IPI00176221 | 39 kDa  | 23  | 26  | 13  | 0   | 21  | 26  | 25  | 6   | 24  | 0.1276 | 0.7332 | 3.7  | 1.0 |
| NEO1 Isoform 1 of Neogenin                                      | IPI00023814 | 160 kDa | 8   | 10  | 8   | 4   | 6   | 7   | 9   | 6   | 7   | 0.8107 | 0.1830 | 1.1  | 0.7 |
| NEU1 Sialidase-1                                                | IPI00029817 | 45 kDa  | 24  | 13  | 0   | 0   | 4   | 5   | 18  | 0   | 4   | 0.0136 | 0.1313 | -    | 0.2 |
| NGFR Tumor necrosis factor receptor superfamily member 1        | IPI00027436 | 45 kDa  | 20  | 18  | 27  | 31  | 12  | 14  | 19  | 29  | 13  | 0.0246 | 0.0374 | 0.5  | 0.7 |
| NHLRC3 NHL repeat-containing protein 3                          | IPI00552937 | 38 kDa  | 11  | 12  | 2   | 0   | 14  | 13  | 11  | 1   | 13  | 0.0097 | 0.0395 | 11.5 | 1.2 |
| NID1 Isoform 1 of Nidogen-1                                     | IPI00026944 | 136 kDa | 52  | 58  | 22  | 29  | 17  | 25  | 55  | 25  | 21  | 0.4884 | 0.0185 | 0.8  | 0.4 |
| NME2 Nucleoside diphosphate kinase                              | IPI00604590 | 33 kDa  | 3   | 8   | 9   | 11  | 0   | 6   | 10  | 0   | 0   | 0.0065 | 0.1605 | 0.0  | 0.0 |
| NOMO3;NOMO1 Nodal modulator 1                                   | IPI00329352 | 134 kDa | 3   | 0   | 0   | 0   | 0   | 0   | 2   | 0   | 0   | -      | 0.4226 | -    | 0.0 |
| NOV Protein NOV homolog                                         | IPI00011140 | 39 kDa  | 28  | 21  | 22  | 26  | 7   | 15  | 24  | 24  | 11  | 0.1046 | 0.1373 | 0.5  | 0.5 |
| NP cDNA FLJ25678 fis, clone TST04067, highly similar to PU      | IPI00017672 | 33 kDa  | 0   | 0   | 5   | 0   | 0   | 0   | 0   | 2   | 0   | 0.4226 | -      | 0.0  | -   |

|                                                           |             |         |     |     |    |    |     |     |     |    |     |        |        |      |     |
|-----------------------------------------------------------|-------------|---------|-----|-----|----|----|-----|-----|-----|----|-----|--------|--------|------|-----|
| NPC2 cDNA FLJ59142, highly similar to Epididymal secretor | IPI00301579 | 22 kDa  | 68  | 59  | 53 | 52 | 98  | 123 | 63  | 53 | 111 | 0.0425 | 0.0699 | 2.1  | 1.7 |
| NQO2 Ribosyldihyronicotinamide dehydrogenase [quinor      | IPI00219129 | 26 kDa  | 2   | 0   | 0  | 0  | 0   | 0   | 1   | 0  | 0   | -      | 0.4226 | -    | 0.0 |
| NRAS GTPase NRas                                          | IPI00000005 | 21 kDa  | 0   | 5   | 0  | 0  | 0   | 0   | 2   | 0  | 0   | -      | 0.4226 | -    | 0.0 |
| NRCAM Isoform 1 of Neuronal cell adhesion molecule        | IPI00333776 | 144 kDa | 5   | 3   | 0  | 0  | 0   | 0   | 4   | 0  | 0   | -      | 0.0318 | -    | 0.0 |
| NUCB1 Nucleobindin-1                                      | IPI00295542 | 54 kDa  | 16  | 17  | 13 | 15 | 0   | 0   | 17  | 14 | 0   | 0.0065 | 0.0015 | 0.0  | 0.0 |
| NUDT1 Isoform p26 of 7,8-dihydro-8-oxoguanine triphosph   | IPI00004392 | 23 kDa  | 10  | 8   | 0  | 0  | 6   | 7   | 9   | 0  | 7   | 0.0043 | 0.1548 | -    | 0.7 |
| NUTF2 Nuclear transport factor 2                          | IPI00009901 | 14 kDa  | 14  | 14  | 9  | 11 | 9   | 6   | 14  | 10 | 7   | 0.2291 | 0.0422 | 0.7  | 0.5 |
| OLFM4 Olfactomedin-4                                      | IPI00022255 | 57 kDa  | 18  | 16  | 31 | 18 | 19  | 21  | 17  | 24 | 20  | 0.5803 | 0.2134 | 0.8  | 1.2 |
| OLR1 Oxidized low-density lipoprotein receptor 1          | IPI00001759 | 31 kDa  | 5   | 3   | 14 | 14 | 0   | 0   | 4   | 14 | 0   | 0.0001 | 0.0318 | 0.0  | 0.0 |
| OPCML Opioid-binding protein/cell adhesion molecule       | IPI00001662 | 38 kDa  | 13  | 10  | 13 | 10 | 16  | 18  | 12  | 11 | 17  | 0.0824 | 0.0751 | 1.5  | 1.5 |
| ORM1 Alpha-1-acid glycoprotein 1                          | IPI00022429 | 24 kDa  | 165 | 189 | 88 | 93 | 366 | 348 | 177 | 90 | 357 | 0.0012 | 0.0069 | 3.9  | 2.0 |
| ORM2 Alpha-1-acid glycoprotein 2                          | IPI00020091 | 24 kDa  | 123 | 132 | 57 | 60 | 285 | 281 | 128 | 58 | 283 | 0.0001 | 0.0011 | 4.9  | 2.2 |
| OSCAR Isoform 6 of Osteoclast associated immunoglobulin   | IPI00107731 | 28 kDa  | 22  | 29  | 28 | 35 | 31  | 21  | 25  | 32 | 26  | 0.4756 | 0.9072 | 0.8  | 1.0 |
| OSTF1 Osteoclast-stimulating factor 1                     | IPI00414836 | 24 kDa  | 0   | 0   | 5  | 10 | 0   | 0   | 0   | 7  | 0   | 0.1018 | -      | 0.0  | -   |
| P4HB Protein disulfide-isomerase                          | IPI00010796 | 57 kDa  | 0   | 6   | 15 | 18 | 0   | 0   | 3   | 16 | 0   | 0.0065 | 0.4226 | 0.0  | 0.0 |
| P76 Putative phospholipase B-like 2                       | IPI00169285 | 65 kDa  | 17  | 9   | 2  | 0  | 36  | 32  | 13  | 1  | 34  | 0.0052 | 0.0418 | 29.4 | 2.6 |
| PACSN3 Protein kinase C and casein kinase substrate in ne | IPI00329572 | 48 kDa  | 0   | 0   | 2  | 0  | 0   | 0   | 0   | 1  | 0   | 0.4226 | -      | 0.0  | -   |
| PAPPA2 Isoform 1 of Pappalysin-2                          | IPI00013569 | 199 kDa | 147 | 144 | 29 | 31 | 87  | 74  | 145 | 30 | 81  | 0.0156 | 0.0098 | 2.7  | 0.6 |
| PARK7 Protein DJ-1                                        | IPI00298547 | 20 kDa  | 11  | 10  | 7  | 5  | 0   | 5   | 11  | 6  | 2   | 0.2623 | 0.0733 | 0.4  | 0.2 |
| PCBD1 Pterin-4-alpha-carbinolamine dehydratase            | IPI00218568 | 12 kDa  | 2   | 0   | 0  | 0  | 2   | 2   | 1   | 0  | 2   | 0.0006 | 0.2907 | -    | 2.4 |
| PCBP1 Poly(rC)-binding protein 1                          | IPI00016610 | 37 kDa  | 4   | 0   | 13 | 14 | 0   | 0   | 2   | 13 | 0   | 0.0011 | 0.4226 | 0.0  | 0.0 |
| PCDH1 Isoform 1 of Protocadherin-1                        | IPI00000024 | 115 kDa | 32  | 33  | 0  | 5  | 19  | 22  | 33  | 3  | 21  | 0.0330 | 0.0268 | 7.5  | 0.6 |
| PCDH12 PCDH12 protein                                     | IPI00009851 | 129 kDa | 0   | 3   | 0  | 0  | 0   | 0   | 2   | 0  | 0   | -      | 0.4226 | -    | 0.0 |
| PCDH19 Isoform 2 of Protocadherin-19                      | IPI00290350 | 121 kDa | 3   | 0   | 0  | 0  | 2   | 2   | 2   | 0  | 2   | 0.0006 | 0.6003 | -    | 1.6 |
| PCDH24 Protocadherin-24                                   | IPI00307446 | 142 kDa | 38  | 46  | 35 | 41 | 95  | 98  | 42  | 38 | 96  | 0.0037 | 0.0066 | 2.5  | 2.3 |
| PCDH9 Isoform 2 of Protocadherin-9                        | IPI00006967 | 132 kDa | 4   | 3   | 3  | 5  | 5   | 7   | 4   | 4  | 6   | 0.3906 | 0.1694 | 1.4  | 1.6 |
| PCDHA9 Isoform 1 of Protocadherin alpha-9                 | IPI00001493 | 102 kDa | 2   | 0   | 0  | 0  | 0   | 0   | 1   | 0  | 0   | -      | 0.4226 | -    | 0.0 |
| PCDHGA12;PCDHGC3 Isoform 1 of Protocadherin gamma-C       | IPI00001872 | 101 kDa | 10  | 12  | 13 | 8  | 0   | 0   | 11  | 10 | 0   | 0.0445 | 0.0049 | 0.0  | 0.0 |
| PCOLCE Procollagen C-endopeptidase enhancer 1             | IPI00299738 | 48 kDa  | 25  | 25  | 15 | 14 | 24  | 20  | 25  | 14 | 22  | 0.0586 | 0.2035 | 1.5  | 0.9 |
| PCOLCE2 Procollagen C-endopeptidase enhancer 2            | IPI00002543 | 46 kDa  | 3   | 3   | 0  | 0  | 0   | 2   | 3   | 0  | 1   | 0.4226 | 0.2314 | -    | 0.4 |
| PCSK1N ProSAAS                                            | IPI00002280 | 27 kDa  | 0   | 3   | 0  | 0  | 0   | 0   | 2   | 0  | 0   | -      | 0.4226 | -    | 0.0 |
| PCYOX1 Prenylcysteine oxidase 1                           | IPI00384280 | 57 kDa  | 2   | 0   | 0  | 0  | 0   | 0   | 1   | 0  | 0   | -      | 0.4226 | -    | 0.0 |
| PDCD1LG2 Isoform 1 of Programmed cell death 1 ligand 2    | IPI00414542 | 31 kDa  | 14  | 13  | 14 | 16 | 0   | 5   | 13  | 15 | 2   | 0.0409 | 0.0466 | 0.2  | 0.2 |
| PDCD6 Programmed cell death protein 6                     | IPI00025277 | 22 kDa  | 8   | 8   | 8  | 10 | 2   | 6   | 8   | 9  | 4   | 0.1304 | 0.1545 | 0.5  | 0.5 |
| PDCD6IP PDCD6IP protein                                   | IPI00246058 | 97 kDa  | 67  | 61  | 39 | 35 | 12  | 13  | 64  | 37 | 13  | 0.0065 | 0.0034 | 0.3  | 0.2 |
| PDGFRB Beta-type platelet-derived growth factor receptor  | IPI00015902 | 124 kDa | 13  | 5   | 6  | 7  | 0   | 5   | 9   | 6  | 2   | 0.2453 | 0.3130 | 0.4  | 0.3 |
| PEBP1 Phosphatidylethanolamine-binding protein 1          | IPI00219446 | 21 kDa  | 20  | 26  | 28 | 22 | 9   | 11  | 23  | 25 | 10  | 0.0408 | 0.0570 | 0.4  | 0.4 |
| PEBP4 Phosphatidylethanolamine-binding protein 4          | IPI00163563 | 26 kDa  | 7   | 6   | 0  | 4  | 4   | 6   | 6   | 2  | 5   | 0.3530 | 0.3398 | 2.4  | 0.8 |
| PEF1 Peflin                                               | IPI00018235 | 30 kDa  | 0   | 0   | 7  | 7  | 0   | 0   | 0   | 7  | 0   | 0.0001 | -      | 0.0  | -   |
| PFN1 Profilin-1                                           | IPI00216691 | 15 kDa  | 17  | 16  | 43 | 44 | 11  | 0   | 17  | 43 | 6   | 0.0215 | 0.1900 | 0.1  | 0.3 |
| PGA4;PGA5;PGA3 pepsinogen 3, group I                      | IPI00736755 | 42 kDa  | 132 | 135 | 72 | 84 | 66  | 72  | 133 | 78 | 69  | 0.3257 | 0.0028 | 0.9  | 0.5 |
| PGC Gastricsin                                            | IPI00022213 | 42 kDa  | 0   | 0   | 0  | 0  | 6   | 6   | 0   | 0  | 6   | 0.0006 | 0.0006 | -    | -   |
| PGCP Putative uncharacterized protein ENSP00000323500     | IPI00005794 | 60 kDa  | 12  | 15  | 15 | 8  | 66  | 48  | 13  | 12 | 57  | 0.0398 | 0.0386 | 4.9  | 4.2 |
| PGD 6-phosphogluconate dehydrogenase, decarboxylating     | IPI00219525 | 53 kDa  | 6   | 6   | 43 | 42 | 0   | 0   | 6   | 43 | 0   | 0.0001 | 0.0004 | 0.0  | 0.0 |
| PGK1 Phosphoglycerate kinase 1                            | IPI00169383 | 45 kDa  | 21  | 17  | 22 | 12 | 0   | 0   | 19  | 17 | 0   | 0.0722 | 0.0093 | 0.0  | 0.0 |
| PGLS 6-phosphogluconolactonase                            | IPI00029997 | 28 kDa  | 22  | 17  | 0  | 0  | 0   | 0   | 20  | 0  | 0   | -      | 0.0141 | -    | 0.0 |
| PGLYRP1 Peptidoglycan recognition protein                 | IPI00021085 | 22 kDa  | 53  | 56  | 46 | 41 | 31  | 44  | 55  | 44 | 37  | 0.4651 | 0.1184 | 0.9  | 0.7 |

|                                                            |             |         |     |     |     |     |     |     |     |     |     |        |        |      |     |
|------------------------------------------------------------|-------------|---------|-----|-----|-----|-----|-----|-----|-----|-----|-----|--------|--------|------|-----|
| PGLYRP2 Isoform 1 of N-acetylmuramoyl-L-alanine amidas     | IPI00163207 | 62 kDa  | 33  | 43  | 5   | 0   | 39  | 31  | 38  | 2   | 35  | 0.0192 | 0.6604 | 15.0 | 0.9 |
| PGM1 Isoform 1 of Phosphoglucomutase-1                     | IPI00219526 | 61 kDa  | 2   | 0   | 0   | 0   | 0   | 0   | 1   | 0   | 0   | -      | 0.4226 | -    | 0.0 |
| PHPT1 14 kDa phosphohistidine phosphatase                  | IPI00299977 | 14 kDa  | 5   | 7   | 0   | 5   | 0   | 0   | 6   | 3   | 0   | 0.4226 | 0.0248 | 0.0  | 0.0 |
| PI16 Isoform 1 of Peptidase inhibitor 16                   | IPI00301143 | 49 kDa  | 90  | 78  | 6   | 3   | 108 | 108 | 84  | 4   | 108 | 0.0002 | 0.0557 | 25.3 | 1.3 |
| PI3 Elafin                                                 | IPI00021434 | 12 kDa  | 14  | 14  | 8   | 14  | 7   | 9   | 14  | 11  | 8   | 0.4988 | 0.0321 | 0.8  | 0.6 |
| PIGR Polymeric immunoglobulin receptor                     | IPI00004573 | 83 kDa  | 274 | 295 | 330 | 306 | 244 | 194 | 284 | 318 | 219 | 0.0692 | 0.1360 | 0.7  | 0.8 |
| PIK3IP1 Isoform 1 of Phosphoinositide-3-kinase-interacting | IPI00298388 | 28 kDa  | 60  | 65  | 80  | 105 | 44  | 51  | 62  | 92  | 47  | 0.0738 | 0.0723 | 0.5  | 0.8 |
| PIP Prolactin-inducible protein                            | IPI00022974 | 17 kDa  | 16  | 14  | 31  | 31  | 15  | 13  | 15  | 31  | 14  | 0.0031 | 0.5810 | 0.4  | 0.9 |
| PJ12239                                                    | IPI00896424 | 9 kDa   | 0   | 0   | 3   | 3   | 6   | 0   | 0   | 3   | 3   | 0.9975 | 0.4226 | 1.0  | -   |
| PKM2 Isoform M1 of Pyruvate kinase isozymes M1/M2          | IPI00220644 | 58 kDa  | 10  | 12  | 14  | 19  | 0   | 13  | 11  | 16  | 7   | 0.2900 | 0.5821 | 0.4  | 0.6 |
| PLA2G15 1-O-acylceramide synthase                          | IPI00301459 | 47 kDa  | 6   | 0   | 0   | 0   | 9   | 8   | 3   | 0   | 8   | 0.0006 | 0.2095 | -    | 2.8 |
| PLAU Urokinase-type plasminogen activator                  | IPI00296180 | 49 kDa  | 39  | 30  | 60  | 86  | 10  | 18  | 34  | 73  | 14  | 0.0475 | 0.0744 | 0.2  | 0.4 |
| PLAUR Isoform 1 of Urokinase plasminogen activator surfa   | IPI00010676 | 37 kDa  | 5   | 8   | 3   | 0   | 6   | 6   | 7   | 2   | 6   | 0.1311 | 0.7902 | 3.5  | 0.9 |
| PLD3 Phospholipase D3                                      | IPI00328243 | 55 kDa  | 3   | 3   | 0   | 0   | 11  | 6   | 3   | 0   | 9   | 0.0836 | 0.1824 | -    | 2.6 |
| PLG Plasminogen                                            | IPI00019580 | 91 kDa  | 24  | 25  | 20  | 23  | 50  | 43  | 25  | 21  | 46  | 0.0251 | 0.0278 | 2.2  | 1.9 |
| PLSCR1 Phospholipid scramblase 1                           | IPI00005181 | 35 kDa  | 4   | 7   | 8   | 12  | 4   | 5   | 5   | 10  | 4   | 0.1082 | 0.5092 | 0.4  | 0.8 |
| PLXDC1 Isoform 1 of Plexin domain-containing protein 1     | IPI00410122 | 56 kDa  | 0   | 3   | 0   | 0   | 0   | 2   | 2   | 0   | 1   | 0.4226 | 0.8187 | -    | 0.7 |
| PLXDC2 Isoform 1 of Plexin domain-containing protein 2     | IPI00044369 | 60 kDa  | 15  | 14  | 20  | 0   | 24  | 15  | 14  | 10  | 19  | 0.4610 | 0.3471 | 2.0  | 1.4 |
| PODXL Podocalyxin-like protein 1                           | IPI00299116 | 56 kDa  | 49  | 50  | 52  | 46  | 35  | 37  | 49  | 49  | 36  | 0.0474 | 0.0049 | 0.7  | 0.7 |
| PPIA Peptidyl-prolyl cis-trans isomerase A                 | IPI00419585 | 18 kDa  | 16  | 14  | 25  | 38  | 5   | 6   | 15  | 32  | 5   | 0.0534 | 0.0153 | 0.2  | 0.4 |
| PPIB Peptidyl-prolyl cis-trans isomerase B                 | IPI00646304 | 24 kDa  | 10  | 13  | 7   | 10  | 0   | 0   | 11  | 8   | 0   | 0.0238 | 0.0136 | 0.0  | 0.0 |
| PPL Perioplakin                                            | IPI00298057 | 205 kDa | 0   | 0   | 0   | 0   | 4   | 0   | 0   | 0   | 2   | 0.4226 | 0.4226 | -    | -   |
| PRCP Lysosomal Pro-X carboxypeptidase                      | IPI00001593 | 56 kDa  | 32  | 39  | 20  | 12  | 46  | 44  | 36  | 16  | 45  | 0.0176 | 0.1319 | 2.8  | 1.3 |
| PRDX1 Peroxiredoxin-1                                      | IPI00000874 | 22 kDa  | 11  | 14  | 29  | 23  | 11  | 8   | 12  | 26  | 10  | 0.0373 | 0.3180 | 0.4  | 0.8 |
| PRDX2 Peroxiredoxin-2                                      | IPI00027350 | 22 kDa  | 9   | 16  | 30  | 19  | 16  | 11  | 13  | 25  | 13  | 0.2118 | 0.8694 | 0.5  | 1.1 |
| PRDX5 Isoform Mitochondrial of Peroxiredoxin-5, mitochoi   | IPI00024915 | 22 kDa  | 4   | 5   | 6   | 11  | 0   | 0   | 4   | 8   | 0   | 0.0823 | 0.0049 | 0.0  | 0.0 |
| PRDX6 Peroxiredoxin-6                                      | IPI00220301 | 25 kDa  | 7   | 7   | 16  | 14  | 0   | 0   | 7   | 15  | 0   | 0.0075 | 0.0000 | 0.0  | 0.0 |
| PRG2 Bone marrow proteoglycan                              | IPI00010341 | 25 kDa  | 93  | 90  | 82  | 97  | 106 | 96  | 91  | 89  | 101 | 0.3277 | 0.2168 | 1.1  | 1.1 |
| PRG4 Isoform A of Proteoglycan 4                           | IPI00024825 | 151 kDa | 20  | 12  | 0   | 7   | 22  | 21  | 16  | 3   | 22  | 0.0333 | 0.2914 | 6.4  | 1.4 |
| PRKCSH cDNA FLJ59211, highly similar to Glucosidase 2 sut  | IPI00026154 | 60 kDa  | 13  | 10  | 28  | 10  | 11  | 17  | 12  | 19  | 14  | 0.6647 | 0.5397 | 0.7  | 1.2 |
| PRND Prion-like protein doppel                             | IPI00018275 | 20 kDa  | 0   | 2   | 7   | 0   | 0   | 0   | 1   | 3   | 0   | 0.4226 | 0.4226 | 0.0  | 0.0 |
| PROCR Endothelial protein C receptor precursor             | IPI00009276 | 31 kDa  | 46  | 48  | 49  | 56  | 31  | 22  | 47  | 52  | 27  | 0.0455 | 0.0449 | 0.5  | 0.6 |
| PROM1 Prominin-1                                           | IPI00012540 | 97 kDa  | 52  | 56  | 36  | 39  | 36  | 30  | 54  | 38  | 33  | 0.3200 | 0.0323 | 0.9  | 0.6 |
| PROM2 Isoform 1 of Prominin-2                              | IPI00295988 | 92 kDa  | 10  | 9   | 10  | 10  | 4   | 5   | 10  | 10  | 4   | 0.0132 | 0.0136 | 0.4  | 0.4 |
| protein (Fragment)                                         | IPI00827839 | 12 kDa  | 11  | 10  | 0   | 0   | 14  | 0   | 11  | 0   | 7   | 0.4226 | 0.6311 | -    | 0.6 |
| PROZ Isoform 1 of Vitamin K-dependent protein Z            | IPI00027843 | 45 kDa  | 8   | 5   | 90  | 82  | 0   | 0   | 6   | 86  | 0   | 0.0025 | 0.0654 | 0.0  | 0.0 |
| PRSS2 Protease serine 2 isoform B                          | IPI00011695 | 28 kDa  | 0   | 0   | 0   | 0   | 4   | 4   | 0   | 0   | 4   | 0.0006 | 0.0006 | -    | -   |
| PRSS8 Prostasin                                            | IPI00329538 | 36 kDa  | 20  | 21  | 17  | 0   | 9   | 9   | 20  | 9   | 9   | 0.9676 | 0.0022 | 1.0  | 0.4 |
| PRTN3 Myeloblastin                                         | IPI00027409 | 28 kDa  | 0   | 0   | 44  | 37  | 0   | 0   | 0   | 40  | 0   | 0.0079 | -      | 0.0  | -   |
| PSAP Isoform Sap-mu-0 of Proactivator polypeptide          | IPI00012503 | 58 kDa  | 73  | 168 | 100 | 101 | 208 | 193 | 121 | 100 | 200 | 0.0056 | 0.2403 | 2.0  | 1.7 |
| PSAT1 cDNA FLJ56437, highly similar to Phosphoserine ami   | IPI00001734 | 45 kDa  | 4   | 0   | 0   | 0   | 0   | 0   | 2   | 0   | 0   | -      | 0.4226 | -    | 0.0 |
| PSCA Prostate stem cell antigen                            | IPI00013446 | 13 kDa  | 21  | 22  | 30  | 35  | 31  | 33  | 21  | 33  | 32  | 0.8381 | 0.0104 | 1.0  | 1.5 |
| PSMA3 Isoform 2 of Proteasome subunit alpha type-3         | IPI00171199 | 28 kDa  | 2   | 0   | 0   | 0   | 0   | 0   | 1   | 0   | 0   | -      | 0.4226 | -    | 0.0 |
| PSMB2 Proteasome subunit beta type-2                       | IPI00028006 | 23 kDa  | 0   | 0   | 0   | 3   | 0   | 0   | 0   | 1   | 0   | 0.4226 | -      | 0.0  | -   |
| PSMB4 Proteasome subunit beta type-4                       | IPI00555956 | 29 kDa  | 0   | 0   | 0   | 3   | 0   | 0   | 0   | 1   | 0   | 0.4226 | -      | 0.0  | -   |
| PSMB5 Proteasome subunit beta type-5                       | IPI00479306 | 28 kDa  | 3   | 0   | 0   | 0   | 0   | 0   | 2   | 0   | 0   | -      | 0.4226 | -    | 0.0 |
| PSMB6 Proteasome subunit beta type-6                       | IPI00000811 | 25 kDa  | 0   | 2   | 0   | 4   | 0   | 0   | 1   | 2   | 0   | 0.4226 | 0.4226 | 0.0  | 0.0 |

|                                                            |             |         |     |     |     |     |     |     |     |     |     |        |        |     |     |
|------------------------------------------------------------|-------------|---------|-----|-----|-----|-----|-----|-----|-----|-----|-----|--------|--------|-----|-----|
| PSME1 Proteasome activator complex subunit 1               | IPI00479722 | 29 kDa  | 0   | 0   | 5   | 7   | 0   | 0   | 0   | 6   | 0   | 0.0344 | -      | 0.0 | -   |
| PTER Phosphotriesterase-related protein                    | IPI00100933 | 39 kDa  | 4   | 0   | 0   | 0   | 0   | 0   | 2   | 0   | 0   | -      | 0.4226 | -   | 0.0 |
| PTGDS Prostaglandin-H2 D-isomerase                         | IPI00013179 | 21 kDa  | 218 | 225 | 89  | 131 | 387 | 414 | 221 | 110 | 400 | 0.0072 | 0.0060 | 3.6 | 1.8 |
| PTGR1 Prostaglandin reductase 1                            | IPI00292657 | 36 kDa  | 6   | 5   | 0   | 0   | 0   | 0   | 5   | 0   | 0   | -      | 0.0168 | -   | 0.0 |
| PTK7 PTK7 protein tyrosine kinase 7 isoform c precursor    | IPI00168813 | 104 kDa | 4   | 0   | 0   | 0   | 0   | 0   | 2   | 0   | 0   | -      | 0.4226 | -   | 0.0 |
| PTPRC Protein tyrosine phosphatase, receptor type, C       | IPI00155168 | 131 kDa | 0   | 0   | 2   | 0   | 0   | 0   | 0   | 1   | 0   | 0.4226 | -      | 0.0 | -   |
| PTPRF Receptor-type tyrosine-protein phosphatase F         | IPI00107831 | 212 kDa | 2   | 0   | 0   | 0   | 2   | 2   | 1   | 0   | 2   | 0.0006 | 0.2907 | -   | 2.4 |
| PTPRJ Receptor-type tyrosine-protein phosphatase eta pre   | IPI00290328 | 152 kDa | 48  | 40  | 50  | 71  | 55  | 40  | 44  | 60  | 47  | 0.4208 | 0.7269 | 0.8 | 1.1 |
| PTPRK Isoform 1 of Receptor-type tyrosine-protein phosph   | IPI00015756 | 162 kDa | 4   | 0   | 0   | 0   | 0   | 0   | 2   | 0   | 0   | -      | 0.4226 | -   | 0.0 |
| PTPRM Receptor-type tyrosine-protein phosphatase mu        | IPI00293849 | 164 kDa | 4   | 0   | 0   | 0   | 0   | 0   | 2   | 0   | 0   | -      | 0.4226 | -   | 0.0 |
| PTPRS Isoform PTPS of Receptor-type tyrosine-protein pho   | IPI00289831 | 217 kDa | 20  | 17  | 21  | 18  | 0   | 7   | 19  | 19  | 4   | 0.0558 | 0.0579 | 0.2 | 0.2 |
| PVR Isoform Beta of Poliovirus receptor                    | IPI00219425 | 40 kDa  | 82  | 90  | 118 | 116 | 55  | 54  | 86  | 117 | 55  | 0.0004 | 0.0153 | 0.5 | 0.6 |
| PVRL1 Isoform Delta of Poliovirus receptor-related protein | IPI00003648 | 57 kDa  | 0   | 3   | 0   | 0   | 0   | 0   | 2   | 0   | 0   | -      | 0.4226 | -   | 0.0 |
| PVRL2 Isoform Delta of Poliovirus receptor-related protein | IPI00022661 | 58 kDa  | 45  | 44  | 23  | 23  | 22  | 31  | 44  | 23  | 27  | 0.5000 | 0.0517 | 1.1 | 0.6 |
| PVRL4 Poliovirus receptor-related protein 4                | IPI00043992 | 55 kDa  | 29  | 22  | 16  | 10  | 4   | 0   | 25  | 13  | 2   | 0.1025 | 0.0278 | 0.1 | 0.1 |
| PYCARD Isoform 1 of Apoptosis-associated speck-like prote  | IPI00001699 | 22 kDa  | 0   | 0   | 7   | 10  | 0   | 0   | 0   | 8   | 0   | 0.0238 | -      | 0.0 | -   |
| PYGM Glycogen phosphorylase, muscle form                   | IPI00218130 | 97 kDa  | 9   | 18  | 20  | 15  | 14  | 8   | 14  | 17  | 11  | 0.2182 | 0.6645 | 0.6 | 0.8 |
| QDPR Dihydropteridine reductase                            | IPI00014439 | 26 kDa  | 5   | 0   | 0   | 0   | 0   | 0   | 3   | 0   | 0   | -      | 0.4226 | -   | 0.0 |
| QPCT Glutaminyl-peptide cyclotransferase                   | IPI00003919 | 41 kDa  | 135 | 121 | 157 | 140 | 52  | 48  | 128 | 149 | 50  | 0.0079 | 0.0087 | 0.3 | 0.4 |
| QPRT Nicotinate-nucleotide pyrophosphorylase [carboxyla    | IPI00300086 | 31 kDa  | 16  | 15  | 0   | 0   | 0   | 0   | 15  | 0   | 0   | -      | 0.0011 | -   | 0.0 |
| QSOX1 Isoform 1 of Sulfhydryl oxidase 1                    | IPI00003590 | 83 kDa  | 56  | 53  | 35  | 26  | 29  | 19  | 54  | 30  | 24  | 0.4239 | 0.0262 | 0.8 | 0.4 |
| RAB10 Ras-related protein Rab-10                           | IPI00016513 | 23 kDa  | 8   | 13  | 16  | 20  | 0   | 11  | 10  | 18  | 5   | 0.1511 | 0.4789 | 0.3 | 0.5 |
| RAB11B Ras-related protein Rab-11B                         | IPI00020436 | 24 kDa  | 5   | 2   | 10  | 14  | 0   | 0   | 4   | 12  | 0   | 0.0172 | 0.1135 | 0.0 | 0.0 |
| RAB1B Ras-related protein Rab-1B                           | IPI00008964 | 22 kDa  | 8   | 9   | 10  | 0   | 0   | 0   | 9   | 5   | 0   | 0.4226 | 0.0049 | 0.0 | 0.0 |
| RAB5C Ras-related protein Rab-5C                           | IPI00016339 | 23 kDa  | 3   | 2   | 5   | 4   | 0   | 0   | 3   | 4   | 0   | 0.0039 | 0.0168 | 0.0 | 0.0 |
| RAB7A Ras-related protein Rab-7a                           | IPI00016342 | 23 kDa  | 0   | 2   | 3   | 4   | 0   | 0   | 1   | 4   | 0   | 0.0065 | 0.4226 | 0.0 | 0.0 |
| RAC1 Isoform A of Ras-related C3 botulinum toxin substrat  | IPI00010271 | 21 kDa  | 13  | 12  | 15  | 18  | 6   | 6   | 12  | 16  | 6   | 0.0163 | 0.0146 | 0.4 | 0.5 |
| RAC2 Ras-related C3 botulinum toxin substrate 2            | IPI00010270 | 21 kDa  | 0   | 0   | 0   | 15  | 0   | 0   | 0   | 7   | 0   | 0.4226 | -      | 0.0 | -   |
| RAP1B Ras-related protein Rap-1b                           | IPI00015148 | 21 kDa  | 8   | 7   | 6   | 8   | 0   | 2   | 7   | 7   | 1   | 0.0745 | 0.0404 | 0.2 | 0.2 |
| RARRES2 Retinoic acid receptor responder protein 2         | IPI00019176 | 19 kDa  | 15  | 12  | 3   | 11  | 6   | 12  | 13  | 7   | 9   | 0.7310 | 0.3274 | 1.3 | 0.7 |
| RBP1 retinol binding protein 1, cellular isoform a         | IPI00219718 | 22 kDa  | 0   | 0   | 0   | 0   | 2   | 0   | 0   | 0   | 1   | 0.4226 | 0.4226 | -   | -   |
| RBP4 Retinol-binding protein 4                             | IPI00022420 | 23 kDa  | 124 | 111 | 69  | 69  | 146 | 175 | 117 | 69  | 160 | 0.0253 | 0.1174 | 2.3 | 1.4 |
| RBP5 Retinol-binding protein 5                             | IPI00219782 | 16 kDa  | 3   | 5   | 2   | 0   | 4   | 4   | 4   | 1   | 4   | 0.1662 | 0.8572 | 3.1 | 1.0 |
| RDX Radixin                                                | IPI00903145 | 69 kDa  | 49  | 38  | 67  | 0   | 40  | 35  | 44  | 34  | 38  | 0.9151 | 0.4247 | 1.1 | 0.9 |
| REG1A Lithostathine-1-alpha                                | IPI00009027 | 19 kDa  | 125 | 132 | 104 | 93  | 208 | 195 | 129 | 98  | 201 | 0.0069 | 0.0101 | 2.0 | 1.6 |
| REG1B Lithostathine-1-beta                                 | IPI00009197 | 19 kDa  | 0   | 0   | 0   | 0   | 109 | 103 | 0   | 0   | 106 | 0.0010 | 0.0010 | -   | -   |
| RELT Tumor necrosis factor receptor superfamily member     | IPI00064377 | 46 kDa  | 21  | 16  | 16  | 23  | 17  | 15  | 19  | 20  | 16  | 0.4592 | 0.4972 | 0.8 | 0.9 |
| RETN Resistin                                              | IPI00006988 | 11 kDa  | 6   | 10  | 15  | 20  | 26  | 27  | 8   | 18  | 27  | 0.0829 | 0.0145 | 1.5 | 3.3 |
| RHCG Ammonium transporter Rh type C                        | IPI00008820 | 53 kDa  | 14  | 0   | 10  | 0   | 0   | 0   | 7   | 5   | 0   | 0.4226 | 0.4226 | 0.0 | 0.0 |
| Rheumatoid factor #REF! light chain (Fragment)             | IPI00829956 | 13 kDa  | 39  | 29  | 24  | 27  | 29  | 24  | 34  | 26  | 26  | 0.9145 | 0.3041 | 1.0 | 0.8 |
| Rheumatoid factor RF                                       | IPI00748265 | 13 kDa  | 0   | 0   | 0   | 0   | 0   | 4   | 0   | 0   | 2   | 0.4226 | 0.4226 | -   | -   |
| RHOA Transforming protein RhoA                             | IPI00478231 | 22 kDa  | 18  | 16  | 14  | 25  | 4   | 4   | 17  | 19  | 4   | 0.0994 | 0.0049 | 0.2 | 0.2 |
| RNASE1 Ribonuclease pancreatic                             | IPI00014048 | 18 kDa  | 387 | 385 | 441 | 511 | 257 | 310 | 386 | 476 | 284 | 0.0476 | 0.0596 | 0.6 | 0.7 |
| RNASE3 Eosinophil cationic protein                         | IPI00025427 | 18 kDa  | 0   | 0   | 9   | 10  | 0   | 0   | 0   | 9   | 0   | 0.0002 | -      | 0.0 | -   |
| RNASE4 Ribonuclease 4                                      | IPI00029699 | 17 kDa  | 0   | 5   | 0   | 0   | 0   | 0   | 2   | 0   | 0   | -      | 0.4226 | -   | 0.0 |
| RNASE6 Ribonuclease K6                                     | IPI00004114 | 17 kDa  | 0   | 2   | 0   | 0   | 7   | 7   | 1   | 0   | 7   | 0.0006 | 0.0344 | -   | 6.3 |
| RNASE7 Ribonuclease 7                                      | IPI00000270 | 17 kDa  | 0   | 0   | 6   | 5   | 0   | 0   | 0   | 6   | 0   | 0.0009 | -      | 0.0 | -   |



|                                                                            |             |         |     |     |     |     |     |     |     |     |     |        |        |      |     |
|----------------------------------------------------------------------------|-------------|---------|-----|-----|-----|-----|-----|-----|-----|-----|-----|--------|--------|------|-----|
| RNASET2 Isoform 1 of Ribonuclease T2                                       | IPI00414896 | 29 kDa  | 27  | 15  | 7   | 5   | 60  | 57  | 21  | 6   | 58  | 0.0010 | 0.0266 | 9.4  | 2.8 |
| RNF13 RING finger protein 13                                               | IPI00151036 | 43 kDa  | 0   | 0   | 0   | 0   | 5   | 7   | 0   | 0   | 6   | 0.0294 | 0.0294 | -    | -   |
| RNF167 E3 ubiquitin-protein ligase RNF167                                  | IPI00023511 | 38 kDa  | 3   | 0   | 0   | 0   | 0   | 0   | 2   | 0   | 0   | -      | 0.4226 | -    | 0.0 |
| RNH1 Ribonuclease inhibitor                                                | IPI00550069 | 50 kDa  | 3   | 3   | 0   | 0   | 0   | 0   | 3   | 0   | 0   | -      | 0.0049 | -    | 0.0 |
| ROBO4 Isoform 1 of Roundabout homolog 4                                    | IPI00103871 | 107 kDa | 179 | 150 | 134 | 121 | 40  | 57  | 164 | 128 | 48  | 0.0177 | 0.0205 | 0.4  | 0.3 |
| ROR1 receptor tyrosine kinase-like orphan receptor 1 isoform 1             | IPI00644416 | 44 kDa  | 8   | 0   | 0   | 0   | 0   | 6   | 4   | 0   | 3   | 0.4226 | 0.8531 | -    | 0.7 |
| ROR2 Tyrosine-protein kinase transmembrane receptor RC1                    | IPI00304999 | 105 kDa | 14  | 15  | 12  | 15  | 6   | 9   | 14  | 13  | 8   | 0.1465 | 0.0590 | 0.6  | 0.5 |
| RRAS2 Ras-related protein R-Ras2                                           | IPI00012512 | 23 kDa  | 2   | 0   | 0   | 0   | 0   | 0   | 1   | 0   | 0   | -      | 0.4226 | -    | 0.0 |
| RTN3 Isoform 3 of Reticulon-3                                              | IPI00028946 | 26 kDa  | 0   | 0   | 8   | 12  | 0   | 0   | 0   | 10  | 0   | 0.0392 | -      | 0.0  | -   |
| RTN4RL2 Reticulon-4 receptor-like 2                                        | IPI00328746 | 46 kDa  | 27  | 26  | 20  | 25  | 29  | 35  | 27  | 22  | 32  | 0.1413 | 0.2639 | 1.4  | 1.2 |
| S100A10 Protein S100-A10                                                   | IPI00183695 | 11 kDa  | 0   | 0   | 3   | 0   | 0   | 0   | 0   | 2   | 0   | 0.4226 | -      | 0.0  | -   |
| S100A11 Protein S100-A11                                                   | IPI00013895 | 12 kDa  | 8   | 15  | 35  | 46  | 19  | 20  | 11  | 41  | 19  | 0.0683 | 0.1571 | 0.5  | 1.7 |
| S100A12 Protein S100-A12                                                   | IPI00218131 | 11 kDa  | 0   | 0   | 28  | 31  | 0   | 0   | 0   | 30  | 0   | 0.0036 | -      | 0.0  | -   |
| S100A14 Protein S100-A14                                                   | IPI00010214 | 12 kDa  | 0   | 0   | 0   | 3   | 0   | 0   | 0   | 1   | 0   | 0.4226 | -      | 0.0  | -   |
| S100A16 Protein S100-A16                                                   | IPI00062120 | 12 kDa  | 0   | 0   | 5   | 0   | 0   | 0   | 0   | 2   | 0   | 0.4226 | -      | 0.0  | -   |
| S100A2 Protein S100-A2                                                     | IPI00019869 | 11 kDa  | 0   | 3   | 0   | 5   | 0   | 0   | 2   | 3   | 0   | 0.4226 | 0.4226 | 0.0  | 0.0 |
| S100A4 Protein S100-A4                                                     | IPI00032313 | 12 kDa  | 0   | 0   | 7   | 10  | 0   | 0   | 0   | 8   | 0   | 0.0238 | -      | 0.0  | -   |
| S100A6 Protein S100-A6                                                     | IPI00027463 | 10 kDa  | 8   | 9   | 7   | 8   | 11  | 9   | 9   | 8   | 10  | 0.1212 | 0.2465 | 1.4  | 1.2 |
| S100A7 Protein S100-A7                                                     | IPI00219806 | 11 kDa  | 10  | 13  | 38  | 39  | 17  | 20  | 11  | 39  | 19  | 0.0054 | 0.0594 | 0.5  | 1.7 |
| S100A8 Protein S100-A8                                                     | IPI00007047 | 11 kDa  | 48  | 69  | 254 | 263 | 90  | 77  | 59  | 258 | 83  | 0.0020 | 0.1836 | 0.3  | 1.4 |
| S100A9 Protein S100-A9                                                     | IPI00027462 | 13 kDa  | 39  | 58  | 233 | 330 | 56  | 53  | 48  | 281 | 55  | 0.0428 | 0.5727 | 0.2  | 1.1 |
| S100P Protein S100-P                                                       | IPI00017526 | 10 kDa  | 2   | 0   | 13  | 15  | 2   | 6   | 1   | 14  | 4   | 0.0421 | 0.2479 | 0.3  | 4.2 |
| SAMM50 Sorting and assembly machinery component 50 family class B member 1 | IPI00412713 | 52 kDa  | 0   | 2   | 0   | 0   | 0   | 0   | 1   | 0   | 0   | -      | 0.4226 | -    | 0.0 |
| SAT2 Diamine acetyltransferase 2                                           | IPI00061651 | 19 kDa  | 0   | 3   | 0   | 0   | 0   | 0   | 2   | 0   | 0   | -      | 0.4226 | -    | 0.0 |
| SCARB2 Lysosome membrane protein 2                                         | IPI00217766 | 54 kDa  | 3   | 0   | 0   | 0   | 4   | 0   | 2   | 0   | 2   | 0.4226 | 0.8926 | -    | 1.2 |
| SCGB1A1 Uteroglobin                                                        | IPI00006705 | 10 kDa  | 9   | 13  | 0   | 0   | 22  | 21  | 11  | 0   | 22  | 0.0006 | 0.0291 | -    | 2.0 |
| SCNN1A Isoform 2 of Amiloride-sensitive sodium channel subunit alpha 1     | IPI00334114 | 82 kDa  | 2   | 0   | 0   | 0   | 0   | 0   | 1   | 0   | 0   | -      | 0.4226 | -    | 0.0 |
| SCP2 Isoform SCPx of Non-specific lipid-transfer protein 2                 | IPI00026105 | 59 kDa  | 0   | 0   | 2   | 0   | 0   | 0   | 0   | 1   | 0   | 0.4226 | -      | 0.0  | -   |
| SCPEP1 Isoform 1 of Retinoid-inducible serine carboxypeptidase 1           | IPI00012426 | 51 kDa  | 20  | 22  | 5   | 0   | 24  | 24  | 21  | 2   | 24  | 0.0116 | 0.1038 | 10.2 | 1.1 |
| SCUBE1 SCUBE1 protein                                                      | IPI00395866 | 37 kDa  | 6   | 6   | 3   | 0   | 0   | 0   | 6   | 2   | 0   | 0.4226 | 0.0004 | 0.0  | 0.0 |
| SCUBE2 Isoform 1 of Signal peptide, CUB and EGF-like domain protein 2      | IPI00024880 | 110 kDa | 7   | 0   | 6   | 0   | 0   | 0   | 4   | 3   | 0   | 0.4226 | 0.4226 | 0.0  | 0.0 |
| SDC4 Syndecan-4                                                            | IPI00011564 | 22 kDa  | 25  | 30  | 42  | 37  | 30  | 25  | 27  | 39  | 27  | 0.0773 | 0.9724 | 0.7  | 1.0 |
| SDCBP Syntenin-1                                                           | IPI00299086 | 32 kDa  | 7   | 8   | 15  | 15  | 2   | 0   | 8   | 15  | 1   | 0.0081 | 0.0433 | 0.1  | 0.2 |
| SDF4 45 kDa calcium-binding protein                                        | IPI00106646 | 42 kDa  | 4   | 0   | 0   | 0   | 0   | 0   | 2   | 0   | 0   | -      | 0.4226 | -    | 0.0 |
| SECTM1 Secreted and transmembrane protein 1                                | IPI00170635 | 27 kDa  | 122 | 139 | 69  | 72  | 52  | 51  | 131 | 71  | 52  | 0.0062 | 0.0119 | 0.7  | 0.4 |
| SELENBP1 cDNA FLJ55757, highly similar to Selenium-binding protein 1       | IPI00012303 | 57 kDa  | 14  | 10  | 0   | 3   | 34  | 35  | 12  | 1   | 35  | 0.0025 | 0.0083 | 25.4 | 2.8 |
| SEMASA Semaphorin-5A                                                       | IPI00013880 | 121 kDa | 6   | 5   | 0   | 0   | 0   | 2   | 5   | 0   | 1   | 0.4226 | 0.0952 | -    | 0.2 |
| SERPINA1 Isoform 1 of Alpha-1-antitrypsin                                  | IPI00553177 | 47 kDa  | 484 | 522 | 518 | 473 | 483 | 426 | 503 | 495 | 454 | 0.3763 | 0.2894 | 0.9  | 0.9 |
| SERPINA3 cDNA FLJ35730 fis, clone TEST12003131, highly similar to SERPINA1 | IPI00550991 | 51 kDa  | 205 | 214 | 140 | 101 | 323 | 290 | 210 | 120 | 306 | 0.0188 | 0.0311 | 2.5  | 1.5 |
| SERPINA4 Kallistatin                                                       | IPI00328609 | 49 kDa  | 14  | 15  | 17  | 10  | 0   | 2   | 14  | 13  | 1   | 0.0956 | 0.0091 | 0.1  | 0.1 |
| SERPINA5 Plasma serine protease inhibitor                                  | IPI00007221 | 46 kDa  | 181 | 197 | 235 | 218 | 235 | 202 | 189 | 226 | 219 | 0.7133 | 0.2469 | 1.0  | 1.2 |
| SERPINA6 Corticosteroid-binding globulin                                   | IPI00027482 | 45 kDa  | 33  | 28  | 0   | 0   | 36  | 32  | 30  | 0   | 34  | 0.0037 | 0.3919 | -    | 1.1 |
| SERPINA7 Thyroxine-binding globulin                                        | IPI00292946 | 46 kDa  | 58  | 69  | 23  | 26  | 65  | 59  | 64  | 25  | 62  | 0.0068 | 0.8136 | 2.5  | 1.0 |
| SERPINB1 Leukocyte elastase inhibitor                                      | IPI00027444 | 43 kDa  | 29  | 25  | 142 | 139 | 21  | 25  | 27  | 141 | 23  | 0.0005 | 0.2480 | 0.2  | 0.8 |
| SERPINB12 SERPINB12 protein                                                | IPI00643202 | 48 kDa  | 3   | 0   | 10  | 11  | 4   | 0   | 2   | 11  | 2   | 0.0428 | 0.8926 | 0.2  | 1.2 |
| SERPINB13 Isoform 1 of Serpin B13                                          | IPI00006560 | 44 kDa  | 0   | 0   | 14  | 10  | 0   | 0   | 0   | 12  | 0   | 0.0329 | -      | 0.0  | -   |
| SERPINB3 Isoform 1 of Serpin B3                                            | IPI00022204 | 45 kDa  | 48  | 43  | 188 | 211 | 71  | 65  | 45  | 199 | 68  | 0.0084 | 0.0296 | 0.3  | 1.5 |

|                                                               |                  |         |     |     |      |      |      |      |     |      |      |        |        |     |     |
|---------------------------------------------------------------|------------------|---------|-----|-----|------|------|------|------|-----|------|------|--------|--------|-----|-----|
| SERPINB4 Serpin B4                                            | IPI00010303      | 45 kDa  | 0   | 0   | 126  | 158  | 44   | 0    | 0   | 142  | 22   | 0.0467 | 0.4226 | 0.2 | -   |
| SERPINB6 Putative uncharacterized protein DKFZp686I042        | IPI00413451      | 46 kDa  | 4   | 0   | 15   | 16   | 6    | 9    | 2   | 16   | 8    | 0.0458 | 0.1514 | 0.5 | 3.9 |
| SERPINF1 Pigment epithelium-derived factor                    | IPI00006114      | 46 kDa  | 13  | 12  | 0    | 0    | 0    | 0    | 12  | 0    | 0    | -      | 0.0036 | -   | 0.0 |
| SERPING1 Plasma protease C1 inhibitor                         | IPI00291866      | 55 kDa  | 350 | 396 | 428  | 433  | 182  | 169  | 373 | 431  | 175  | 0.0007 | 0.0144 | 0.4 | 0.5 |
| SERPINI1 Neuroserpin                                          | IPI00016150      | 46 kDa  | 14  | 10  | 6    | 0    | 6    | 4    | 12  | 3    | 5    | 0.5965 | 0.0836 | 1.7 | 0.4 |
| SEZGL2 Isoform 3 of Seizure 6-like protein 2                  | IPI00018276      | 92 kDa  | 9   | 8   | 7    | 10   | 0    | 6    | 9   | 8    | 3    | 0.2431 | 0.2034 | 0.4 | 0.3 |
| SFN Isoform 1 of 14-3-3 protein sigma                         | IPI00013890      | 28 kDa  | 4   | 0   | 23   | 27   | 0    | 0    | 2   | 25   | 0    | 0.0065 | 0.4226 | 0.0 | 0.0 |
| SGSH N-sulphoglucosamine sulphohydrolase                      | IPI00019988      | 57 kDa  | 25  | 20  | 0    | 0    | 16   | 14   | 22  | 0    | 15   | 0.0042 | 0.1325 | -   | 0.7 |
| SH3BGR1 SH3 domain-binding glutamic acid-rich-like prote      | IPI00025318      | 13 kDa  | 3   | 0   | 8    | 12   | 6    | 6    | 2   | 10   | 6    | 0.1866 | 0.0940 | 0.6 | 4.0 |
| SH3BGR3 SH3 domain-binding glutamic acid-rich-like prot       | IPI00746352      | 10 kDa  | 22  | 30  | 9    | 12   | 45   | 63   | 26  | 11   | 54   | 0.0418 | 0.1051 | 5.0 | 2.1 |
| SHISA5 Isoform 1 of Protein shisa-5                           | IPI00166039      | 26 kDa  | 13  | 10  | 13   | 11   | 11   | 15   | 12  | 12   | 13   | 0.5864 | 0.5839 | 1.1 | 1.1 |
| SHMT1 Isoform 1 of Serine hydroxymethyltransferase, cytc      | IPI00002519      | 53 kDa  | 4   | 8   | 0    | 0    | 0    | 0    | 6   | 0    | 0    | -      | 0.0972 | -   | 0.0 |
| SIAE Isoform 1 of Sialate O-acetyltransferase                 | IPI00010949      | 58 kDa  | 37  | 35  | 0    | 0    | 47   | 64   | 36  | 0    | 56   | 0.0215 | 0.1422 | -   | 1.6 |
| similar to Hepatitis B virus receptor binding protein         | IPI00883855      | 12 kDa  | 10  | 26  | 0    | 0    | 39   | 32   | 18  | 0    | 35   | 0.0088 | 0.1962 | -   | 1.9 |
| similar to Immunglobulin heavy chain variable region          | IPI00883765      | 14 kDa  | 0   | 9   | 0    | 0    | 12   | 12   | 5   | 0    | 12   | 0.0006 | 0.2449 | -   | 2.6 |
| SIRPA signal-regulatory protein alpha precursor               | IPI00332887      | 55 kDa  | 78  | 82  | 52   | 45   | 144  | 125  | 80  | 49   | 135  | 0.0135 | 0.0297 | 2.8 | 1.7 |
| SIRPB1 43 kDa protein                                         | IPI00844132      | 43 kDa  | 37  | 36  | 31   | 20   | 77   | 76   | 36  | 26   | 76   | 0.0115 | 0.0006 | 3.0 | 2.1 |
| SLAMF1 Isoform 1 of Signaling lymphocytic activation mole     | IPI00012469      | 37 kDa  | 0   | 0   | 0    | 0    | 0    | 2    | 0   | 0    | 1    | 0.4226 | 0.4226 | -   | -   |
| SLC12A1 Isoform A of Solute carrier family 12 member 1        | IPI00443898      | 121 kDa | 150 | 134 | 88   | 79   | 83   | 96   | 142 | 83   | 90   | 0.5128 | 0.0366 | 1.1 | 0.6 |
| SLC12A3 solute carrier family 12, member 3 isoform 1          | IPI00646907      | 114 kDa | 70  | 78  | 30   | 25   | 0    | 0    | 74  | 27   | 0    | 0.0103 | 0.0031 | 0.0 | 0.0 |
| SLC26A4 Pendrin                                               | IPI00012842      | 86 kDa  | 2   | 0   | 0    | 0    | 0    | 0    | 1   | 0    | 0    | -      | 0.4226 | -   | 0.0 |
| SLC2A3 Solute carrier family 2, facilitated glucose transport | IPI00003909      | 54 kDa  | 0   | 0   | 5    | 0    | 0    | 0    | 0   | 2    | 0    | 0.4226 | -      | 0.0 | -   |
| SLC2A5 Solute carrier family 2, facilitated glucose transport | IPI00027452      | 55 kDa  | 4   | 0   | 8    | 0    | 0    | 0    | 2   | 4    | 0    | 0.4226 | 0.4226 | 0.0 | 0.0 |
| SLC3A2;LOC442497 4F2 cell-surface antigen heavy chain         | IPI00027493      | 58 kDa  | 5   | 6   | 0    | 0    | 0    | 0    | 5   | 0    | 0    | -      | 0.0049 | -   | 0.0 |
| SLC44A2 Isoform 1 of Choline transporter-like protein 2       | IPI00549521      | 80 kDa  | 25  | 13  | 47   | 37   | 9    | 7    | 19  | 42   | 8    | 0.0241 | 0.2206 | 0.2 | 0.4 |
| SLC44A4 Isoform 2 of Choline transporter-like protein 4       | IPI00641073      | 79 kDa  | 0   | 12  | 7    | 8    | 14   | 0    | 6   | 8    | 7    | 0.9263 | 0.9148 | 0.9 | 1.2 |
| SLC9A3R1 Ezrin-radixin-moesin-binding phosphoprotein 5c       | IPI00003527      | 39 kDa  | 8   | 10  | 0    | 0    | 0    | 0    | 9   | 0    | 0    | -      | 0.0162 | -   | 0.0 |
| SLK Isoform 1 of STE20-like serine/threonine-protein kinase   | IPI00022827      | 143 kDa | 2   | 0   | 0    | 0    | 0    | 0    | 1   | 0    | 0    | -      | 0.4226 | -   | 0.0 |
| SLPI Antileukoproteinase                                      | IPI00008580      | 14 kDa  | 9   | 3   | 3    | 0    | 2    | 0    | 6   | 2    | 1    | 0.8390 | 0.2426 | 0.7 | 0.2 |
| SLURP1 Secreted Ly-6/uPAR-related protein 1                   | IPI00022620      | 11 kDa  | 24  | 23  | 29   | 30   | 25   | 41   | 24  | 29   | 33   | 0.7003 | 0.3651 | 1.1 | 1.4 |
| SMO Smoothened homolog                                        | IPI00018471      | 86 kDa  | 0   | 0   | 6    | 5    | 0    | 0    | 0   | 6    | 0    | 0.0009 | -      | 0.0 | -   |
| SMPDL3A Acid sphingomyelinase-like phosphodiesterase 3        | IPI00178767      | 51 kDa  | 0   | 0   | 0    | 0    | 24   | 17   | 0   | 0    | 20   | 0.0297 | 0.0297 | -   | -   |
| SNCG Gamma-synuclein                                          | IPI00297714      | 13 kDa  | 0   | 3   | 0    | 0    | 0    | 0    | 2   | 0    | 0    | -      | 0.4226 | -   | 0.0 |
| SOD1 Superoxide dismutase [Cu-Zn]                             | IPI00218733      | 16 kDa  | 9   | 8   | 7    | 7    | 6    | 24   | 9   | 7    | 15   | 0.4529 | 0.5396 | 2.2 | 1.8 |
| SOD3 Extracellular superoxide dismutase [Cu-Zn]               | IPI00027827      | 26 kDa  | 35  | 30  | 0    | 8    | 9    | 11   | 32  | 4    | 10   | 0.3147 | 0.0138 | 2.4 | 0.3 |
| SORD Sorbitol dehydrogenase                                   | IPI00216057      | 38 kDa  | 11  | 3   | 0    | 0    | 0    | 0    | 7   | 0    | 0    | -      | 0.1954 | -   | 0.0 |
| SORL1 Sortilin-related receptor                               | IPI00022608      | 248 kDa | 97  | 89  | 13   | 18   | 45   | 33   | 93  | 15   | 39   | 0.0647 | 0.0172 | 2.6 | 0.4 |
| SORT1 Sortilin                                                | IPI00217882      | 92 kDa  | 0   | 2   | 0    | 0    | 0    | 0    | 1   | 0    | 0    | -      | 0.4226 | -   | 0.0 |
| sp_ALBU_BOVIN                                                 | IPIsp_ALBU_BOVI  | 69 kDa  | 355 | 392 | 434  | 434  | 364  | 325  | 373 | 434  | 345  | 0.0450 | 0.3990 | 0.8 | 0.9 |
| sp_ANT3_HUMAN                                                 | IPIsp_ANT3_HUM   | 53 kDa  | 43  | 47  | 47   | 12   | 70   | 67   | 45  | 30   | 69   | 0.1598 | 0.0103 | 2.3 | 1.5 |
| sp_CAS1_BOVIN                                                 | IPIsp_CAS1_BOVII | 25 kDa  | 0   | 0   | 3    | 0    | 0    | 0    | 0   | 2    | 0    | 0.4226 | -      | 0.0 | -   |
| sp_TRFL_HUMAN                                                 | IPIsp_TRFL_HUM   | 78 kDa  | 12  | 6   | 604  | 581  | 57   | 34   | 9   | 593  | 46   | 0.0009 | 0.0901 | 0.1 | 5.2 |
| sp_TRYP_PIG                                                   | IPIsp_TRYP_PIG   | 24 kDa  | 831 | 875 | 1110 | 1035 | 2179 | 1812 | 853 | 1073 | 1996 | 0.0388 | 0.0252 | 1.9 | 2.3 |
| SPARCL1 15 kDa protein                                        | IPI00793166      | 15 kDa  | 8   | 0   | 0    | 0    | 0    | 0    | 4   | 0    | 0    | -      | 0.4226 | -   | 0.0 |
| SPARCL1 SPARC-like protein 1                                  | IPI00296777      | 75 kDa  | 92  | 73  | 52   | 39   | 25   | 21   | 82  | 46   | 23   | 0.0741 | 0.0267 | 0.5 | 0.3 |
| SPINK1 Pancreatic secretory trypsin inhibitor                 | IPI00020687      | 9 kDa   | 10  | 12  | 5    | 5    | 7    | 12   | 11  | 5    | 10   | 0.1736 | 0.6760 | 1.9 | 0.9 |
| SPINT1 Isoform 2 of Kunitz-type protease inhibitor 1          | IPI00011643      | 57 kDa  | 13  | 12  | 15   | 11   | 0    | 8    | 12  | 13   | 4    | 0.1966 | 0.1930 | 0.3 | 0.3 |

|                                                           |             |         |     |     |     |     |     |     |     |     |     |        |        |     |     |
|-----------------------------------------------------------|-------------|---------|-----|-----|-----|-----|-----|-----|-----|-----|-----|--------|--------|-----|-----|
| SPINT2 Kunitz-type protease inhibitor 2                   | IPI00011662 | 28 kDa  | 17  | 21  | 23  | 27  | 19  | 21  | 19  | 25  | 20  | 0.1639 | 0.6774 | 0.8 | 1.1 |
| SPOCK2 Testican-2                                         | IPI00006128 | 47 kDa  | 4   | 9   | 0   | 0   | 7   | 0   | 7   | 0   | 4   | 0.4226 | 0.5920 | -   | 0.6 |
| SPP1 Isoform A of Osteopontin                             | IPI00021000 | 35 kDa  | 344 | 319 | 178 | 195 | 173 | 183 | 332 | 187 | 178 | 0.4755 | 0.0076 | 1.0 | 0.5 |
| SPRR1A Cornifin-A                                         | IPI00914840 | 10 kDa  | 38  | 31  | 80  | 108 | 14  | 15  | 35  | 94  | 15  | 0.0293 | 0.0300 | 0.2 | 0.4 |
| SPRR1B Cornifin-B                                         | IPI00304903 | 10 kDa  | 23  | 0   | 42  | 64  | 0   | 0   | 12  | 53  | 0   | 0.0418 | 0.4226 | 0.0 | 0.0 |
| SPRR1B Small proline rich protein                         | IPI00873761 | 8 kDa   | 0   | 0   | 0   | 53  | 0   | 0   | 0   | 27  | 0   | 0.4226 | -      | 0.0 | -   |
| SPRR2A Small proline-rich protein 2A                      | IPI00017993 | 8 kDa   | 5   | 6   | 28  | 29  | 0   | 0   | 5   | 28  | 0   | 0.0002 | 0.0049 | 0.0 | 0.0 |
| SPRR2D Small proline-rich protein 2D                      | IPI00386598 | 8 kDa   | 0   | 0   | 0   | 25  | 0   | 0   | 0   | 12  | 0   | 0.4226 | -      | 0.0 | -   |
| SPRR3 Small proline-rich protein 3                        | IPI00082931 | 18 kDa  | 104 | 108 | 288 | 339 | 20  | 22  | 106 | 314 | 21  | 0.0075 | 0.0009 | 0.1 | 0.2 |
| SPTAN1 cDNA FLJ61399, highly similar to Spectrin alpha ch | IPI00744706 | 282 kDa | 0   | 0   | 6   | 3   | 0   | 0   | 0   | 4   | 0   | 0.1089 | -      | 0.0 | -   |
| SRI Sorcin                                                | IPI00027175 | 22 kDa  | 6   | 10  | 7   | 8   | 0   | 0   | 8   | 8   | 0   | 0.0065 | 0.0644 | 0.0 | 0.0 |
| STOM Erythrocyte band 7 integral membrane protein         | IPI00219682 | 32 kDa  | 10  | 0   | 37  | 34  | 2   | 2   | 5   | 36  | 2   | 0.0021 | 0.6579 | 0.1 | 0.5 |
| SULF2 Isoform 1 of Extracellular sulfatase Sulf-2         | IPI00297252 | 100 kDa | 2   | 0   | 0   | 0   | 0   | 0   | 1   | 0   | 0   | -      | 0.4226 | -   | 0.0 |
| SUSD2 Sushi domain-containing protein 2                   | IPI00021302 | 90 kDa  | 12  | 13  | 9   | 10  | 0   | 0   | 12  | 9   | 0   | 0.0002 | 0.0007 | 0.0 | 0.0 |
| TAGLN2 Transgelin-2                                       | IPI00550363 | 22 kDa  | 5   | 5   | 12  | 11  | 0   | 0   | 5   | 11  | 0   | 0.0009 | 0.0017 | 0.0 | 0.0 |
| TALDO1 Transaldolase                                      | IPI00744692 | 38 kDa  | 7   | 0   | 45  | 57  | 0   | 0   | 4   | 51  | 0   | 0.0136 | 0.4226 | 0.0 | 0.0 |
| TBCA Tubulin-specific chaperone A                         | IPI00217236 | 13 kDa  | 0   | 2   | 0   | 8   | 0   | 0   | 1   | 4   | 0   | 0.4226 | 0.4226 | 0.0 | 0.0 |
| TF Serotransferrin                                        | IPI00022463 | 77 kDa  | 636 | 579 | 557 | 516 | 377 | 411 | 608 | 536 | 394 | 0.0334 | 0.0232 | 0.7 | 0.6 |
| TFF1 Trefoil factor 1                                     | IPI00022283 | 9 kDa   | 13  | 15  | 12  | 10  | 22  | 19  | 14  | 11  | 21  | 0.0376 | 0.0793 | 2.0 | 1.5 |
| TFF2 Trefoil factor 2                                     | IPI00010675 | 14 kDa  | 117 | 141 | 96  | 106 | 68  | 87  | 129 | 101 | 78  | 0.1645 | 0.0785 | 0.8 | 0.6 |
| TFF3 trefoil factor 3 precursor                           | IPI00018909 | 14 kDa  | 21  | 23  | 16  | 18  | 21  | 30  | 22  | 17  | 25  | 0.1884 | 0.5221 | 1.5 | 1.2 |
| TGFBR1 TGF-beta receptor type-1                           | IPI00005733 | 56 kDa  | 7   | 13  | 2   | 3   | 0   | 0   | 10  | 3   | 0   | 0.0065 | 0.0740 | 0.0 | 0.0 |
| TGFBR2 Isoform 1 of TGF-beta receptor type-2              | IPI00020431 | 65 kDa  | 0   | 0   | 0   | 0   | 4   | 2   | 0   | 0   | 3   | 0.0468 | 0.0468 | -   | -   |
| TGM3 Protein-glutamine gamma-glutamyltransferase E        | IPI00300376 | 77 kDa  | 0   | 0   | 5   | 0   | 0   | 0   | 0   | 2   | 0   | 0.4226 | -      | 0.0 | -   |
| TGM4 Protein-glutamine gamma-glutamyltransferase 4        | IPI00290396 | 77 kDa  | 16  | 8   | 0   | 0   | 0   | 0   | 12  | 0   | 0   | -      | 0.0937 | -   | 0.0 |
| TGOLN2 Isoform TGN51 of Trans-Golgi network integral m    | IPI00012545 | 51 kDa  | 8   | 3   | 12  | 0   | 4   | 2   | 6   | 6   | 3   | 0.6845 | 0.3759 | 0.5 | 0.5 |
| THBD Thrombomodulin                                       | IPI00010737 | 60 kDa  | 6   | 0   | 0   | 0   | 0   | 0   | 3   | 0   | 0   | -      | 0.4226 | -   | 0.0 |
| THBS1 Thrombospondin-1                                    | IPI00296099 | 129 kDa | 21  | 16  | 15  | 12  | 30  | 19  | 19  | 14  | 24  | 0.1977 | 0.4336 | 1.8 | 1.3 |
| THY1 Thy-1 membrane glycoprotein                          | IPI00022892 | 18 kDa  | 14  | 15  | 0   | 10  | 16  | 15  | 14  | 5   | 16  | 0.1481 | 0.1794 | 3.3 | 1.1 |
| TIMP2 Metalloproteinase inhibitor 2                       | IPI00027166 | 24 kDa  | 18  | 18  | 25  | 16  | 0   | 0   | 18  | 21  | 0   | 0.0445 | 0.0001 | 0.0 | 0.0 |
| TKT cDNA FLJ54957, highly similar to Transketolase        | IPI00643920 | 69 kDa  | 0   | 0   | 17  | 27  | 0   | 0   | 0   | 22  | 0   | 0.0456 | -      | 0.0 | -   |
| TM7SF3 Transmembrane 7 superfamily member 3               | IPI00009797 | 64 kDa  | 0   | 0   | 0   | 4   | 0   | 0   | 0   | 2   | 0   | 0.4226 | -      | 0.0 | -   |
| TMBIM1 Transmembrane BAX inhibitor motif-containing p     | IPI00290452 | 35 kDa  | 9   | 0   | 9   | 0   | 0   | 0   | 5   | 5   | 0   | 0.4226 | 0.4226 | 0.0 | 0.0 |
| TMED7 Transmembrane emp24 domain-containing proteir       | IPI00032825 | 25 kDa  | 4   | 2   | 2   | 0   | 6   | 6   | 3   | 1   | 6   | 0.0523 | 0.0775 | 5.2 | 1.9 |
| TMEM106B Transmembrane protein 106B                       | IPI00395903 | 31 kDa  | 22  | 12  | 10  | 10  | 10  | 12  | 17  | 10  | 11  | 0.4725 | 0.3848 | 1.1 | 0.6 |
| TMEM132A Isoform 1 of Transmembrane protein 132A          | IPI00301865 | 110 kDa | 8   | 5   | 0   | 0   | 0   | 0   | 6   | 0   | 0   | -      | 0.0654 | -   | 0.0 |
| TMEM149 Isoform 1 of Transmembrane protein 149            | IPI00002910 | 38 kDa  | 6   | 6   | 3   | 8   | 6   | 6   | 6   | 6   | 6   | 0.9273 | 0.4440 | 1.0 | 1.0 |
| TMOD3 Tropomodulin-3                                      | IPI00005087 | 40 kDa  | 0   | 0   | 2   | 5   | 0   | 0   | 0   | 4   | 0   | 0.1314 | -      | 0.0 | -   |
| TNC Isoform 1 of Tenascin                                 | IPI00031008 | 241 kDa | 14  | 18  | 24  | 31  | 7   | 7   | 16  | 28  | 7   | 0.0280 | 0.0567 | 0.3 | 0.4 |
| TNFRSF12A Isoform 1 of Tumor necrosis factor receptor su  | IPI00010277 | 14 kDa  | 0   | 0   | 0   | 0   | 4   | 0   | 0   | 0   | 2   | 0.4226 | 0.4226 | -   | -   |
| TNFRSF14 Tumor necrosis factor receptor superfamily men   | IPI00024331 | 30 kDa  | 5   | 6   | 16  | 19  | 5   | 4   | 5   | 18  | 4   | 0.0140 | 0.3007 | 0.2 | 0.8 |
| TNFRSF1B Isoform 1 of Tumor necrosis factor receptor sup  | IPI00023501 | 48 kDa  | 20  | 16  | 15  | 16  | 19  | 22  | 18  | 16  | 21  | 0.1366 | 0.4551 | 1.3 | 1.1 |
| TNXB Isoform XB of Tenascin-X                             | IPI00025276 | 464 kDa | 25  | 29  | 30  | 38  | 19  | 12  | 27  | 34  | 15  | 0.0699 | 0.0964 | 0.4 | 0.6 |
| TOLLIP Toll-interacting protein                           | IPI00100154 | 30 kDa  | 0   | 0   | 2   | 3   | 0   | 0   | 0   | 3   | 0   | 0.0065 | -      | 0.0 | -   |
| TP53I3 Isoform 1 of Putative quinone oxidoreductase       | IPI00384643 | 36 kDa  | 4   | 0   | 0   | 0   | 0   | 0   | 2   | 0   | 0   | -      | 0.4226 | -   | 0.0 |
| TPI1 Isoform 1 of Triosephosphate isomerase               | IPI00465028 | 31 kDa  | 26  | 10  | 29  | 50  | 7   | 13  | 18  | 40  | 10  | 0.1172 | 0.4389 | 0.3 | 0.6 |
| TPM3 Isoform 2 of Tropomyosin alpha-3 chain               | IPI00218319 | 29 kDa  | 0   | 0   | 58  | 72  | 0   | 0   | 0   | 65  | 0   | 0.0119 | -      | 0.0 | -   |

|                                                                         |             |          |      |      |      |      |      |      |      |      |      |        |        |      |     |
|-------------------------------------------------------------------------|-------------|----------|------|------|------|------|------|------|------|------|------|--------|--------|------|-----|
| TPM4 Isoform 1 of Tropomyosin alpha-4 chain                             | IPI00010779 | 29 kDa   | 0    | 0    | 41   | 38   | 0    | 0    | 0    | 39   | 0    | 0.0009 | -      | 0.0  | -   |
| TPM4 Isoform 2 of Tropomyosin alpha-4 chain                             | IPI00216975 | 33 kDa   | 0    | 0    | 45   | 38   | 0    | 0    | 0    | 42   | 0    | 0.0070 | -      | 0.0  | -   |
| TPP1 Putative uncharacterized protein TPP1                              | IPI00554538 | 60 kDa   | 12   | 21   | 7    | 11   | 19   | 17   | 16   | 9    | 18   | 0.0604 | 0.8091 | 2.0  | 1.1 |
| TPT1 Tumor protein, translationally-controlled 1                        | IPI00009943 | 22 kDa   | 2    | 0    | 0    | 0    | 0    | 0    | 1    | 0    | 0    | -      | 0.4226 | -    | 0.0 |
| TRHDE Thyrotropin-releasing hormone-degrading ectoenzyme                | IPI00007798 | 117 kDa  | 26   | 25   | 9    | 11   | 16   | 13   | 26   | 10   | 15   | 0.1270 | 0.0206 | 1.4  | 0.6 |
| TSG101 Isoform 1 of Tumor susceptibility gene 101 protein               | IPI00018434 | 44 kDa   | 10   | 9    | 7    | 8    | 6    | 8    | 10   | 8    | 7    | 0.8187 | 0.1651 | 1.0  | 0.8 |
| TSPAN1 Tetraspanin-1                                                    | IPI00030936 | 26 kDa   | 12   | 10   | 29   | 16   | 5    | 0    | 11   | 23   | 2    | 0.0968 | 0.0799 | 0.1  | 0.2 |
| TTL3;ARPC4 Actin-related protein 2/3 complex subunit 4                  | IPI00554811 | 20 kDa   | 2    | 0    | 5    | 5    | 0    | 0    | 1    | 5    | 0    | 0.0065 | 0.4226 | 0.0  | 0.0 |
| TTN Isoform 2 of Titin                                                  | IPI00023283 | 3806 kDa | 10   | 0    | 15   | 0    | 0    | 0    | 5    | 8    | 0    | 0.4226 | 0.4226 | 0.0  | 0.0 |
| TTR Transthyretin                                                       | IPI00022432 | 16 kDa   | 24   | 24   | 16   | 18   | 10   | 12   | 24   | 17   | 11   | 0.0368 | 0.0050 | 0.6  | 0.5 |
| TUBA1C TUBA1C protein                                                   | IPI00166768 | 37 kDa   | 0    | 2    | 0    | 0    | 0    | 0    | 1    | 0    | 0    | -      | 0.4226 | -    | 0.0 |
| TUBB2C Tubulin beta-2C chain                                            | IPI00007752 | 50 kDa   | 7    | 3    | 0    | 0    | 0    | 0    | 5    | 0    | 0    | -      | 0.0983 | -    | 0.0 |
| TWSG1 Isoform 1 of Twisted gastrulation protein homolog                 | IPI00410487 | 25 kDa   | 0    | 0    | 0    | 0    | 0    | 4    | 0    | 0    | 2    | 0.4226 | 0.4226 | -    | -   |
| TXN Thioredoxin                                                         | IPI00216298 | 12 kDa   | 0    | 6    | 7    | 8    | 7    | 7    | 3    | 8    | 7    | 0.7031 | 0.2670 | 1.0  | 2.5 |
| TXNDC5 Thioredoxin domain-containing protein 5                          | IPI00171438 | 48 kDa   | 7    | 6    | 0    | 0    | 0    | 0    | 6    | 0    | 0    | -      | 0.0093 | -    | 0.0 |
| UBA1 Ubiquitin-like modifier-activating enzyme 1                        | IPI00645078 | 118 kDa  | 0    | 5    | 0    | 0    | 0    | 0    | 2    | 0    | 0    | -      | 0.4226 | -    | 0.0 |
| UBC;RPS27A;UBB ubiquitin and ribosomal protein S27a precursor           | IPI00179330 | 18 kDa   | 159  | 121  | 115  | 135  | 106  | 110  | 140  | 125  | 108  | 0.2432 | 0.2351 | 0.9  | 0.8 |
| UBE2L3 Ubiquitin-conjugating enzyme E2 L3                               | IPI00021347 | 18 kDa   | 0    | 0    | 5    | 0    | 0    | 0    | 0    | 2    | 0    | 0.4226 | -      | 0.0  | -   |
| UBE2N Ubiquitin-conjugating enzyme E2 N                                 | IPI00003949 | 17 kDa   | 3    | 5    | 2    | 8    | 0    | 0    | 4    | 5    | 0    | 0.2152 | 0.0419 | 0.0  | 0.0 |
| UBE2V1 Isoform 3 of Ubiquitin-conjugating enzyme E2 variable            | IPI00472498 | 16 kDa   | 2    | 3    | 0    | 4    | 0    | 0    | 3    | 2    | 0    | 0.4226 | 0.0644 | 0.0  | 0.0 |
| UEVLD cDNA FLJ54696, highly similar to Homo sapiens UEV1L               | IPI00440160 | 50 kDa   | 2    | 0    | 0    | 3    | 0    | 0    | 1    | 1    | 0    | 0.4226 | 0.4226 | 0.0  | 0.0 |
| UMOD Isoform 1 of Uromodulin                                            | IPI00013945 | 70 kDa   | 2486 | 2520 | 4483 | 4566 | 2422 | 2709 | 2503 | 4524 | 2565 | 0.0058 | 0.7093 | 0.6  | 1.0 |
| UNC5C Isoform 1 of Netrin receptor UNC5C                                | IPI00293757 | 103 kDa  | 0    | 2    | 0    | 0    | 0    | 0    | 1    | 0    | 0    | -      | 0.4226 | -    | 0.0 |
| Uncharacterized protein ENSP00000348237                                 | IPI00453476 | 29 kDa   | 8    | 7    | 7    | 10   | 0    | 0    | 7    | 8    | 0    | 0.0238 | 0.0053 | 0.0  | 0.0 |
| Uncharacterized protein ENSP00000375035                                 | IPI00735451 | 13 kDa   | 0    | 8    | 5    | 0    | 0    | 0    | 4    | 2    | 0    | 0.4226 | 0.4226 | 0.0  | 0.0 |
| Uncharacterized protein ENSP00000383556                                 | IPI00872531 | 23 kDa   | 2    | 5    | 13   | 12   | 0    | 0    | 3    | 12   | 0    | 0.0004 | 0.1268 | 0.0  | 0.0 |
| UPK1A Isoform 1 of Uroplakin-1a                                         | IPI00011279 | 29 kDa   | 5    | 0    | 44   | 50   | 0    | 0    | 3    | 47   | 0    | 0.0046 | 0.4226 | 0.0  | 0.0 |
| UPK1B Uroplakin-1b                                                      | IPI00215889 | 30 kDa   | 0    | 0    | 8    | 0    | 0    | 0    | 0    | 4    | 0    | 0.4226 | -      | 0.0  | -   |
| UPK2 Uroplakin-2                                                        | IPI00012113 | 19 kDa   | 0    | 3    | 0    | 3    | 4    | 4    | 2    | 1    | 4    | 0.2372 | 0.3845 | 2.7  | 2.1 |
| VASN Vasorin                                                            | IPI00395488 | 72 kDa   | 164  | 195  | 145  | 162  | 133  | 136  | 179  | 153  | 135  | 0.1647 | 0.1006 | 0.9  | 0.8 |
| VCAM1 Isoform 1 of Vascular cell adhesion protein 1                     | IPI00018136 | 81 kDa   | 30   | 28   | 3    | 4    | 67   | 71   | 29   | 4    | 69   | 0.0009 | 0.0030 | 18.3 | 2.4 |
| VCL Isoform 1 of Vinculin                                               | IPI00291175 | 117 kDa  | 3    | 2    | 54   | 49   | 0    | 0    | 3    | 52   | 0    | 0.0027 | 0.0168 | 0.0  | 0.0 |
| VDAC1 Voltage-dependent anion-selective channel protein 1               | IPI00216308 | 31 kDa   | 0    | 5    | 0    | 0    | 0    | 0    | 2    | 0    | 0    | -      | 0.4226 | -    | 0.0 |
| VIM Vimentin                                                            | IPI00418471 | 54 kDa   | 0    | 0    | 96   | 150  | 0    | 0    | 0    | 123  | 0    | 0.0445 | -      | 0.0  | -   |
| VMO1 Vitelline membrane outer layer protein 1 homolog                   | IPI00216914 | 22 kDa   | 47   | 61   | 61   | 75   | 25   | 21   | 54   | 68   | 23   | 0.0233 | 0.0508 | 0.3  | 0.4 |
| VNN1 Pantetheinase                                                      | IPI00030871 | 57 kDa   | 17   | 17   | 8    | 4    | 29   | 34   | 17   | 6    | 31   | 0.0183 | 0.0373 | 5.2  | 1.8 |
| VPS28 Vacuolar protein sorting-associated protein 28 homolog            | IPI00007155 | 25 kDa   | 6    | 8    | 9    | 8    | 0    | 0    | 7    | 9    | 0    | 0.0039 | 0.0209 | 0.0  | 0.0 |
| VPS37B Vacuolar protein sorting-associated protein 37B                  | IPI00002926 | 31 kDa   | 3    | 0    | 0    | 0    | 0    | 0    | 2    | 0    | 0    | -      | 0.4226 | -    | 0.0 |
| VPS37D Vacuolar protein sorting-associated protein 37D                  | IPI00374354 | 40 kDa   | 4    | 0    | 0    | 0    | 0    | 0    | 2    | 0    | 0    | -      | 0.4226 | -    | 0.0 |
| VPS4A Vacuolar protein sorting-associating protein 4A                   | IPI00411356 | 49 kDa   | 4    | 7    | 8    | 5    | 0    | 0    | 5    | 7    | 0    | 0.0364 | 0.0644 | 0.0  | 0.0 |
| VPS4B Vacuolar protein sorting-associating protein 4B                   | IPI00182728 | 49 kDa   | 3    | 0    | 6    | 0    | 0    | 0    | 2    | 3    | 0    | 0.4226 | 0.4226 | 0.0  | 0.0 |
| VSIG4 Isoform 1 of V-set and immunoglobulin domain-containing protein 4 | IPI00027038 | 44 kDa   | 5    | 7    | 6    | 3    | 7    | 5    | 6    | 4    | 6    | 0.4650 | 0.9409 | 1.4  | 1.0 |
| VTA1 LYST-interacting protein LIP5 (Fragment)                           | IPI00844002 | 26 kDa   | 7    | 7    | 5    | 5    | 15   | 0    | 7    | 5    | 7    | 0.7765 | 0.9521 | 1.5  | 1.1 |
| VTN Vitronectin                                                         | IPI00298971 | 54 kDa   | 63   | 84   | 52   | 67   | 71   | 77   | 74   | 59   | 74   | 0.2087 | 0.9793 | 1.2  | 1.0 |
| VWF von Willebrand factor                                               | IPI00023014 | 309 kDa  | 0    | 0    | 0    | 0    | 4    | 5    | 0    | 0    | 4    | 0.0136 | 0.0136 | -    | -   |
| WFDC2 Isoform 1 of WAP four-disulfide core domain protein 2             | IPI00291488 | 13 kDa   | 91   | 114  | 94   | 106  | 58   | 63   | 103  | 100  | 61   | 0.0266 | 0.0698 | 0.6  | 0.6 |
| WISP2 WNT1-inducible-signaling pathway protein 2                        | IPI00022052 | 27 kDa   | 14   | 26   | 8    | 12   | 9    | 18   | 20   | 10   | 13   | 0.6030 | 0.4581 | 1.3  | 0.7 |

|                                                   |             |        |     |     |     |     |     |     |     |     |     |        |        |        |     |     |
|---------------------------------------------------|-------------|--------|-----|-----|-----|-----|-----|-----|-----|-----|-----|--------|--------|--------|-----|-----|
| XPNPEP2 Xaa-Pro aminopeptidase 2                  | IPI00439344 | 76 kDa | 2   | 6   | 0   | 0   | 0   | 0   | 0   | 4   | 0   | 0      | -      | 0.1751 | -   | 0.0 |
| YWHAB Isoform Short of 14-3-3 protein beta/alpha  | IPI00759832 | 28 kDa | 10  | 7   | 22  | 26  | 0   | 0   | 8   | 24  | 0   | 0.0065 | 0.0318 | 0.0    | 0.0 |     |
| YWHAE 14-3-3 protein epsilon                      | IPI00000816 | 29 kDa | 8   | 10  | 21  | 19  | 0   | 0   | 9   | 20  | 0   | 0.0020 | 0.0162 | 0.0    | 0.0 |     |
| YWHAG 14-3-3 protein gamma                        | IPI00220642 | 28 kDa | 0   | 7   | 0   | 12  | 0   | 0   | 3   | 6   | 0   | 0.4226 | 0.4226 | 0.0    | 0.0 |     |
| YWHAH 14-3-3 protein eta                          | IPI00216319 | 28 kDa | 0   | 0   | 0   | 11  | 0   | 0   | 0   | 5   | 0   | 0.4226 | -      | 0.0    | -   |     |
| YWHAQ 14-3-3 protein theta                        | IPI00018146 | 28 kDa | 6   | 5   | 0   | 12  | 0   | 0   | 5   | 6   | 0   | 0.4226 | 0.0168 | 0.0    | 0.0 |     |
| YWHAZ 14-3-3 protein zeta/delta                   | IPI00021263 | 28 kDa | 13  | 12  | 49  | 59  | 0   | 2   | 12  | 54  | 1   | 0.0094 | 0.0155 | 0.0    | 0.1 |     |
| ZNF749;HLA-DRB3;LOC100133484;HLA-DRB2;LOC10013361 | IPI00019449 | 18 kDa | 186 | 196 | 141 | 167 | 142 | 143 | 191 | 154 | 142 | 0.4587 | 0.0103 | 0.9    | 0.7 |     |
|                                                   | IPI00827939 | 12 kDa | 0   | 6   | 0   | 0   | 0   | 0   | 3   | 0   | 0   | -      | 0.4226 | -      | 0.0 |     |
|                                                   | IPI00387105 | 12 kDa | 5   | 5   | 0   | 0   | 0   | 0   | 5   | 0   | 0   | -      | 0.0017 | -      | 0.0 |     |
|                                                   | IPI00470652 | 26 kDa | 15  | 0   | 0   | 0   | 0   | 0   | 8   | 0   | 0   | -      | 0.4226 | -      | 0.0 |     |
